# Supplementary material
Source: publisher figshare collection journal article supplement (https://acs.figshare.com/ndownloader/files/3782356)
Supplement: Supplementary file 1 [file 3782356]

data_global

#==============================================================================

_publ_contact_author_name             'Prof. Dr. Franc Meyer'
_publ_contact_author_address
; Institut f\"ur Anorganische Chemie
  Georg-August-Universit\"at G\"ottingen
  Tammannstra\&se 4
  D-37077 G\"ottingen
  Germany
;
_publ_contact_author_email         'franc.meyer@chemie.uni-goettingen.de'
_publ_contact_author_fax           '49(551)3933063'
_publ_contact_author_phone         '49(551)3933012'
_publ_requested_journal            'Inorg. Chem.'
_publ_requested_coeditor_name     ?

#==============================================================================

_publ_section_title
;
 1,1'-Bis(pyrazol-3-yl)ferrocene: a clip ligand that forms supramolecular
 aggregates and gives prismatic hexanuclear coinage metal complexes
;

loop_
 _publ_author_name
 _publ_author_address
     'Veronelli, Mattia'
;    Institut f\"ur Anorganische Chemie
     Georg-August-Universit\"at G\"ottingen
     Tammannstra\&se 4
     D-37077 G\"ottingen
     Germany
;
     'Dechert, Sebastian'
;    Institut f\"ur Anorganische Chemie
     Georg-August-Universit\"at G\"ottingen
     Tammannstra\&se 4
     D-37077 G\"ottingen
     Germany
;
     'Demeshko, Serhiy'
;    Institut f\"ur Anorganische Chemie
     Georg-August-Universit\"at G\"ottingen
     Tammannstra\&se 4
     D-37077 G\"ottingen
     Germany
;
     'Meyer, Franc'
;    Institut f\"ur Anorganische Chemie
     Georg-August-Universit\"at G\"ottingen
     Tammannstra\&se 4
     D-37077 G\"ottingen
     Germany
;

#==============================================================================

data_H2LH-mv191

_audit_creation_method            SHELXL-2013
_chemical_name_systematic
;
 ?
;
_chemical_name_common             ?
_chemical_melting_point           ?
_chemical_formula_moiety          
 'C18 H18 Fe N4'
_chemical_formula_sum
 'C18 H18 Fe N4'
_chemical_formula_weight          346.21

loop_
 _atom_type_symbol
 _atom_type_description
 _atom_type_scat_dispersion_real
 _atom_type_scat_dispersion_imag
 _atom_type_scat_source
 'C'  'C'   0.0033   0.0016
 'International Tables Vol C Tables 4.2.6.8 and 6.1.1.4'
 'H'  'H'   0.0000   0.0000
 'International Tables Vol C Tables 4.2.6.8 and 6.1.1.4'
 'N'  'N'   0.0061   0.0033
 'International Tables Vol C Tables 4.2.6.8 and 6.1.1.4'
 'Fe'  'Fe'   0.3463   0.8444
 'International Tables Vol C Tables 4.2.6.8 and 6.1.1.4'

_space_group_crystal_system       monoclinic
_space_group_IT_number            15
_space_group_name_H-M_alt         'C 2/c'
_space_group_name_Hall            '-C 2yc'

_shelx_space_group_comment
;
The symmetry employed for this shelxl refinement is uniquely defined
by the following loop, which should always be used as a source of
symmetry information in preference to the above space-group names.
They are only intended as comments.
;

loop_
 _space_group_symop_operation_xyz
 'x, y, z'
 '-x, y, -z+1/2'
 'x+1/2, y+1/2, z'
 '-x+1/2, y+1/2, -z+1/2'
 '-x, -y, -z'
 'x, -y, z-1/2'
 '-x+1/2, -y+1/2, -z'
 'x+1/2, -y+1/2, z-1/2'

_cell_length_a                    20.2254(13)
_cell_length_b                    13.4796(7)
_cell_length_c                    11.5855(7)
_cell_angle_alpha                 90
_cell_angle_beta                  95.455(5)
_cell_angle_gamma                 90
_cell_volume                      3144.3(3)
_cell_formula_units_Z             8
_cell_measurement_temperature     133(2)
_cell_measurement_reflns_used     17570
_cell_measurement_theta_min       1.818
_cell_measurement_theta_max       26.776

_exptl_crystal_description        block
_exptl_crystal_colour             orange
_exptl_crystal_density_meas       ?
_exptl_crystal_density_method     ?
_exptl_crystal_density_diffrn     1.463
_exptl_crystal_F_000              1440
_exptl_transmission_factor_min    ?
_exptl_transmission_factor_max    ?
_exptl_crystal_size_max           0.380
_exptl_crystal_size_mid           0.190
_exptl_crystal_size_min           0.160
_exptl_absorpt_coefficient_mu     0.963
_shelx_estimated_absorpt_T_min    0.711
_shelx_estimated_absorpt_T_max    0.861
_exptl_absorpt_correction_type    numerical
_exptl_absorpt_correction_T_min   0.7543
_exptl_absorpt_correction_T_max   0.8944
_exptl_absorpt_process_details    'X-RED (Stoe & Cie, 2002)'

_exptl_special_details
;
 ?
;

_diffrn_ambient_temperature       133(2)
_diffrn_radiation_wavelength      0.71073
_diffrn_radiation_type            MoK\a
_diffrn_source                    'fine-focus sealed tube'
_diffrn_measurement_device_type   'Stoe IPDS II'
_diffrn_measurement_method        \w
_diffrn_detector_area_resol_mean  ?
_diffrn_reflns_number             17570
_diffrn_reflns_av_unetI/netI      0.0494
_diffrn_reflns_av_R_equivalents   0.0827
_diffrn_reflns_limit_h_min        -25
_diffrn_reflns_limit_h_max        25
_diffrn_reflns_limit_k_min        -17
_diffrn_reflns_limit_k_max        17
_diffrn_reflns_limit_l_min        -14
_diffrn_reflns_limit_l_max        11
_diffrn_reflns_theta_min          1.818
_diffrn_reflns_theta_max          26.776
_diffrn_reflns_theta_full         25.242
_diffrn_measured_fraction_theta_max   0.997
_diffrn_measured_fraction_theta_full  0.999
_diffrn_reflns_Laue_measured_fraction_max    0.997
_diffrn_reflns_Laue_measured_fraction_full   0.999
_diffrn_reflns_point_group_measured_fraction_max   0.997
_diffrn_reflns_point_group_measured_fraction_full  0.999
_reflns_number_total              3359
_reflns_number_gt                 2804
_reflns_threshold_expression      'I > 2\s(I)'
_reflns_Friedel_coverage          0.000
_reflns_Friedel_fraction_max      .
_reflns_Friedel_fraction_full     .

_reflns_special_details
;
 Reflections were merged by SHELXL according to the crystal
 class for the calculation of statistics and refinement.

 _reflns_Friedel_fraction is defined as the number of unique
 Friedel pairs measured divided by the number that would be
 possible theoretically, ignoring centric projections and
 systematic absences.
;

_computing_data_collection        'X-AREA (Stoe & Cie, 2002)'
_computing_cell_refinement        'X-AREA (Stoe & Cie, 2002)'
_computing_data_reduction         'X-AREA (Stoe & Cie, 2002)'
_computing_structure_solution     'SHELXS-2013 (Sheldrick, 2013)'
_computing_structure_refinement   'SHELXL-2013 (Sheldrick, 2013)'
_computing_molecular_graphics     'DIAMOND (Brandenburg, 2001)'
_computing_publication_material   'SHELXL-2013 (Sheldrick, 2013)'

_refine_special_details
;
 ?
;
_refine_ls_structure_factor_coef  Fsqd
_refine_ls_matrix_type            full
_refine_ls_weighting_scheme       calc
_refine_ls_weighting_details
'w=1/[\s^2^(Fo^2^)+(0.0469P)^2^] where P=(Fo^2^+2Fc^2^)/3'
_atom_sites_solution_primary      ?
_atom_sites_solution_secondary    ?
_atom_sites_solution_hydrogens    mixed
_refine_ls_hydrogen_treatment     mixed
_refine_ls_extinction_method      none
_refine_ls_extinction_coef        .
_refine_ls_number_reflns          3359
_refine_ls_number_parameters      224
_refine_ls_number_restraints      0
_refine_ls_R_factor_all           0.0455
_refine_ls_R_factor_gt            0.0332
_refine_ls_wR_factor_ref          0.0810
_refine_ls_wR_factor_gt           0.0772
_refine_ls_goodness_of_fit_ref    0.999
_refine_ls_restrained_S_all       0.999
_refine_ls_shift/su_max           0.001
_refine_ls_shift/su_mean          0.000

loop_
 _atom_site_label
 _atom_site_type_symbol
 _atom_site_fract_x
 _atom_site_fract_y
 _atom_site_fract_z
 _atom_site_U_iso_or_equiv
 _atom_site_adp_type
 _atom_site_occupancy
 _atom_site_site_symmetry_order
 _atom_site_calc_flag
 _atom_site_refinement_flags_posn
 _atom_site_refinement_flags_adp
 _atom_site_refinement_flags_occupancy
 _atom_site_disorder_assembly
 _atom_site_disorder_group
Fe1 Fe 0.37178(2) 0.61749(2) 0.47656(2) 0.02111(10) Uani 1 1 d . . . . .
N1 N 0.43557(8) 0.70560(12) 0.78924(14) 0.0243(3) Uani 1 1 d . . . . .
N2 N 0.42469(8) 0.76773(12) 0.87679(15) 0.0252(3) Uani 1 1 d . . . . .
N3 N 0.45216(8) 0.87299(12) 0.58364(16) 0.0292(4) Uani 1 1 d . . . . .
N4 N 0.44484(8) 0.94322(13) 0.66528(17) 0.0301(4) Uani 1 1 d . . . . .
C1 C 0.32748(8) 0.70500(13) 0.80876(17) 0.0217(4) Uani 1 1 d . . . . .
H1A H 0.2813 0.6908 0.7979 0.026 Uiso 1 1 calc R U . . .
C2 C 0.37713(8) 0.66640(13) 0.74609(16) 0.0203(4) Uani 1 1 d . . . . .
C3 C 0.35962(8) 0.76869(14) 0.89046(17) 0.0232(4) Uani 1 1 d . . . . .
C4 C 0.33286(11) 0.82714(17) 0.9847(2) 0.0364(5) Uani 1 1 d . . . . .
H4A H 0.3290 0.7842 1.0520 0.055 Uiso 1 1 calc R U . . .
H4B H 0.2890 0.8534 0.9571 0.055 Uiso 1 1 calc R U . . .
H4C H 0.3630 0.8823 1.0069 0.055 Uiso 1 1 calc R U . . .
C5 C 0.37333(8) 0.59334(13) 0.65327(17) 0.0216(4) Uani 1 1 d . . . . .
C6 C 0.31329(9) 0.55585(14) 0.59312(17) 0.0238(4) Uani 1 1 d . . . . .
H6 H 0.2695 0.5761 0.6053 0.029 Uiso 1 1 calc R U . . .
C7 C 0.33043(10) 0.48339(14) 0.51223(18) 0.0277(4) Uani 1 1 d . . . . .
H7 H 0.3000 0.4464 0.4616 0.033 Uiso 1 1 calc R U . . .
C8 C 0.40084(9) 0.47566(13) 0.51993(18) 0.0265(4) Uani 1 1 d . . . . .
H8 H 0.4257 0.4326 0.4756 0.032 Uiso 1 1 calc R U . . .
C9 C 0.42747(9) 0.54389(14) 0.60576(17) 0.0246(4) Uani 1 1 d . . . . .
H9 H 0.4733 0.5549 0.6279 0.030 Uiso 1 1 calc R U . . .
C11 C 0.34433(9) 0.89803(14) 0.59202(17) 0.0245(4) Uani 1 1 d . . . . .
H11 H 0.2974 0.8941 0.5769 0.029 Uiso 1 1 calc R U . . .
C12 C 0.39147(8) 0.84396(13) 0.53827(16) 0.0219(4) Uani 1 1 d . . . . .
C13 C 0.37996(9) 0.95896(14) 0.67222(17) 0.0260(4) Uani 1 1 d . . . . .
C14 C 0.35654(12) 1.03121(18) 0.7568(2) 0.0408(5) Uani 1 1 d . . . . .
H14A H 0.3678 1.0066 0.8358 0.061 Uiso 1 1 calc R U . . .
H14B H 0.3083 1.0391 0.7426 0.061 Uiso 1 1 calc R U . . .
H14C H 0.3781 1.0954 0.7477 0.061 Uiso 1 1 calc R U . . .
C15 C 0.38325(9) 0.76763(13) 0.44971(17) 0.0230(4) Uani 1 1 d . . . . .
C16 C 0.32134(9) 0.73277(14) 0.39375(17) 0.0265(4) Uani 1 1 d . . . . .
H16 H 0.2785 0.7556 0.4086 0.032 Uiso 1 1 calc R U . . .
C17 C 0.33482(11) 0.65843(16) 0.31242(18) 0.0329(4) Uani 1 1 d . . . . .
H17 H 0.3027 0.6232 0.2633 0.039 Uiso 1 1 calc R U . . .
C18 C 0.40475(12) 0.64598(16) 0.31741(19) 0.0347(5) Uani 1 1 d . . . . .
H18 H 0.4275 0.6010 0.2720 0.042 Uiso 1 1 calc R U . . .
C19 C 0.43476(10) 0.71240(15) 0.40196(19) 0.0292(4) Uani 1 1 d . . . . .
H19 H 0.4811 0.7191 0.4233 0.035 Uiso 1 1 calc R U . . .
H1 H 0.476(3) 0.705(5) 0.761(7) 0.080 Uiso 0.49(4) 1 d . U P A 1
H2 H 0.458(4) 0.803(5) 0.905(6) 0.080 Uiso 0.51(4) 1 d . U P A 2
H3 H 0.494(4) 0.852(6) 0.587(7) 0.080 Uiso 0.46(4) 1 d . U P B 3
H4 H 0.479(3) 0.957(5) 0.708(6) 0.080 Uiso 0.54(4) 1 d . U P B 4

loop_
 _atom_site_aniso_label
 _atom_site_aniso_U_11
 _atom_site_aniso_U_22
 _atom_site_aniso_U_33
 _atom_site_aniso_U_23
 _atom_site_aniso_U_13
 _atom_site_aniso_U_12
Fe1 0.02240(14) 0.02110(14) 0.01991(15) -0.00082(11) 0.00241(9) -0.00011(10)
N1 0.0203(7) 0.0310(8) 0.0213(8) 0.0006(7) 0.0009(6) -0.0029(6)
N2 0.0224(7) 0.0291(8) 0.0240(9) 0.0004(7) 0.0018(6) -0.0016(6)
N3 0.0235(7) 0.0275(8) 0.0351(10) 0.0053(7) -0.0058(7) -0.0019(6)
N4 0.0251(8) 0.0301(9) 0.0332(10) 0.0058(8) -0.0073(7) -0.0013(7)
C1 0.0168(8) 0.0251(9) 0.0227(9) 0.0007(7) 0.0004(7) 0.0004(6)
C2 0.0198(8) 0.0223(9) 0.0186(9) 0.0045(7) 0.0012(7) 0.0001(6)
C3 0.0228(8) 0.0239(9) 0.0229(10) 0.0014(7) 0.0028(7) -0.0001(7)
C4 0.0359(11) 0.0398(12) 0.0339(13) -0.0124(10) 0.0061(9) 0.0006(9)
C5 0.0210(8) 0.0230(9) 0.0211(9) 0.0024(7) 0.0030(7) -0.0003(6)
C6 0.0212(8) 0.0255(9) 0.0250(10) 0.0006(8) 0.0035(7) -0.0028(7)
C7 0.0320(9) 0.0238(9) 0.0276(10) -0.0021(8) 0.0046(8) -0.0057(7)
C8 0.0329(10) 0.0210(9) 0.0266(10) 0.0013(8) 0.0080(8) 0.0028(7)
C9 0.0223(8) 0.0265(9) 0.0253(10) 0.0039(8) 0.0031(7) 0.0033(7)
C11 0.0205(8) 0.0268(9) 0.0255(10) 0.0010(7) -0.0010(7) 0.0013(7)
C12 0.0217(8) 0.0210(8) 0.0222(10) 0.0057(7) -0.0023(7) -0.0007(7)
C13 0.0283(9) 0.0257(9) 0.0231(10) 0.0029(8) -0.0017(7) 0.0005(7)
C14 0.0511(13) 0.0406(12) 0.0310(12) -0.0098(10) 0.0060(10) -0.0005(10)
C15 0.0255(9) 0.0216(9) 0.0220(10) 0.0042(7) 0.0019(7) 0.0008(7)
C16 0.0299(9) 0.0251(9) 0.0231(10) 0.0024(8) -0.0040(8) 0.0010(7)
C17 0.0470(12) 0.0305(10) 0.0198(10) 0.0001(8) -0.0042(8) -0.0021(9)
C18 0.0538(13) 0.0274(10) 0.0250(11) -0.0003(8) 0.0146(9) 0.0022(9)
C19 0.0329(10) 0.0252(9) 0.0311(11) 0.0040(8) 0.0110(8) -0.0007(7)

_geom_special_details
;
 All esds (except the esd in the dihedral angle between two l.s. planes)
 are estimated using the full covariance matrix.  The cell esds are taken
 into account individually in the estimation of esds in distances, angles
 and torsion angles; correlations between esds in cell parameters are only
 used when they are defined by crystal symmetry.  An approximate (isotropic)
 treatment of cell esds is used for estimating esds involving l.s. planes.
;

loop_
 _geom_bond_atom_site_label_1
 _geom_bond_atom_site_label_2
 _geom_bond_distance
 _geom_bond_site_symmetry_2
 _geom_bond_publ_flag
Fe1 C9 2.0427(19) . ?
Fe1 C16 2.0469(19) . ?
Fe1 C8 2.0486(18) . ?
Fe1 C7 2.0503(19) . ?
Fe1 C17 2.052(2) . ?
Fe1 C19 2.053(2) . ?
Fe1 C6 2.0536(18) . ?
Fe1 C18 2.056(2) . ?
Fe1 C15 2.0639(18) . ?
Fe1 C5 2.070(2) . ?
N1 C2 1.347(2) . ?
N1 N2 1.349(2) . ?
N2 C3 1.341(2) . ?
N3 C12 1.347(2) . ?
N3 N4 1.356(3) . ?
N4 C13 1.339(2) . ?
C1 C3 1.392(3) . ?
C1 C2 1.395(3) . ?
C2 C5 1.455(3) . ?
C3 C4 1.489(3) . ?
C5 C6 1.433(2) . ?
C5 C9 1.436(3) . ?
C6 C7 1.419(3) . ?
C7 C8 1.422(3) . ?
C8 C9 1.422(3) . ?
C11 C13 1.389(3) . ?
C11 C12 1.393(3) . ?
C12 C15 1.451(3) . ?
C13 C14 1.490(3) . ?
C15 C16 1.433(3) . ?
C15 C19 1.434(3) . ?
C16 C17 1.420(3) . ?
C17 C18 1.420(3) . ?
C18 C19 1.420(3) . ?

loop_
 _geom_angle_atom_site_label_1
 _geom_angle_atom_site_label_2
 _geom_angle_atom_site_label_3
 _geom_angle
 _geom_angle_site_symmetry_1
 _geom_angle_site_symmetry_3
 _geom_angle_publ_flag
C9 Fe1 C16 158.08(8) . . ?
C9 Fe1 C8 40.68(8) . . ?
C16 Fe1 C8 160.39(8) . . ?
C9 Fe1 C7 68.36(8) . . ?
C16 Fe1 C7 124.68(8) . . ?
C8 Fe1 C7 40.60(8) . . ?
C9 Fe1 C17 159.51(8) . . ?
C16 Fe1 C17 40.53(8) . . ?
C8 Fe1 C17 123.30(8) . . ?
C7 Fe1 C17 107.71(8) . . ?
C9 Fe1 C19 106.87(8) . . ?
C16 Fe1 C19 68.36(8) . . ?
C8 Fe1 C19 120.65(8) . . ?
C7 Fe1 C19 156.28(8) . . ?
C17 Fe1 C19 68.17(9) . . ?
C9 Fe1 C6 68.51(7) . . ?
C16 Fe1 C6 108.83(8) . . ?
C8 Fe1 C6 68.34(8) . . ?
C7 Fe1 C6 40.46(8) . . ?
C17 Fe1 C6 122.44(8) . . ?
C19 Fe1 C6 161.47(8) . . ?
C9 Fe1 C18 123.01(8) . . ?
C16 Fe1 C18 68.13(9) . . ?
C8 Fe1 C18 106.52(8) . . ?
C7 Fe1 C18 121.26(8) . . ?
C17 Fe1 C18 40.45(9) . . ?
C19 Fe1 C18 40.44(9) . . ?
C6 Fe1 C18 157.17(8) . . ?
C9 Fe1 C15 121.65(8) . . ?
C16 Fe1 C15 40.81(7) . . ?
C8 Fe1 C15 156.69(7) . . ?
C7 Fe1 C15 161.56(8) . . ?
C17 Fe1 C15 68.46(8) . . ?
C19 Fe1 C15 40.76(8) . . ?
C6 Fe1 C15 125.16(8) . . ?
C18 Fe1 C15 68.34(8) . . ?
C9 Fe1 C5 40.85(7) . . ?
C16 Fe1 C5 122.88(8) . . ?
C8 Fe1 C5 68.51(8) . . ?
C7 Fe1 C5 68.29(8) . . ?
C17 Fe1 C5 158.25(8) . . ?
C19 Fe1 C5 124.24(8) . . ?
C6 Fe1 C5 40.67(7) . . ?
C18 Fe1 C5 160.17(8) . . ?
C15 Fe1 C5 108.18(7) . . ?
C2 N1 N2 108.81(15) . . ?
C3 N2 N1 109.08(16) . . ?
C12 N3 N4 108.62(17) . . ?
C13 N4 N3 108.97(17) . . ?
C3 C1 C2 105.74(15) . . ?
N1 C2 C1 108.08(16) . . ?
N1 C2 C5 121.52(16) . . ?
C1 C2 C5 130.34(16) . . ?
N2 C3 C1 108.29(16) . . ?
N2 C3 C4 121.41(17) . . ?
C1 C3 C4 130.23(17) . . ?
C6 C5 C9 106.96(17) . . ?
C6 C5 C2 125.51(16) . . ?
C9 C5 C2 127.52(16) . . ?
C6 C5 Fe1 69.04(11) . . ?
C9 C5 Fe1 68.55(11) . . ?
C2 C5 Fe1 128.26(13) . . ?
C7 C6 C5 108.36(16) . . ?
C7 C6 Fe1 69.64(11) . . ?
C5 C6 Fe1 70.29(10) . . ?
C6 C7 C8 108.36(17) . . ?
C6 C7 Fe1 69.89(11) . . ?
C8 C7 Fe1 69.63(10) . . ?
C7 C8 C9 107.87(16) . . ?
C7 C8 Fe1 69.76(11) . . ?
C9 C8 Fe1 69.44(10) . . ?
C8 C9 C5 108.44(16) . . ?
C8 C9 Fe1 69.88(11) . . ?
C5 C9 Fe1 70.60(11) . . ?
C13 C11 C12 105.95(16) . . ?
N3 C12 C11 108.09(17) . . ?
N3 C12 C15 121.39(17) . . ?
C11 C12 C15 130.51(16) . . ?
N4 C13 C11 108.36(17) . . ?
N4 C13 C14 121.16(19) . . ?
C11 C13 C14 130.47(18) . . ?
C16 C15 C19 106.91(18) . . ?
C16 C15 C12 126.06(17) . . ?
C19 C15 C12 127.03(17) . . ?
C16 C15 Fe1 68.96(10) . . ?
C19 C15 Fe1 69.21(11) . . ?
C12 C15 Fe1 126.55(13) . . ?
C17 C16 C15 108.48(17) . . ?
C17 C16 Fe1 69.92(12) . . ?
C15 C16 Fe1 70.23(10) . . ?
C16 C17 C18 108.04(18) . . ?
C16 C17 Fe1 69.55(11) . . ?
C18 C17 Fe1 69.92(12) . . ?
C19 C18 C17 108.20(18) . . ?
C19 C18 Fe1 69.68(12) . . ?
C17 C18 Fe1 69.62(12) . . ?
C18 C19 C15 108.36(18) . . ?
C18 C19 Fe1 69.88(12) . . ?
C15 C19 Fe1 70.03(11) . . ?

loop_
 _geom_hbond_atom_site_label_D
 _geom_hbond_atom_site_label_H
 _geom_hbond_atom_site_label_A
 _geom_hbond_distance_DH
 _geom_hbond_distance_HA
 _geom_hbond_distance_DA
 _geom_hbond_angle_DHA
 _geom_hbond_site_symmetry_A
N1 H1 N1  0.92(6) 1.93(6) 2.841(3) 177(8) 2_656
N2 H2 N3  0.86(8) 2.04(8) 2.865(2) 160(7) 2_656
N3 H3 N2  0.88(9) 2.02(9) 2.865(2) 161(7) 2_656
N4 H4 N4  0.83(6) 2.04(6) 2.828(3) 160(6) 2_656

_refine_diff_density_max    0.395
_refine_diff_density_min   -0.316
_refine_diff_density_rms    0.066

_shelxl_version_number 2013-4

_shelx_res_file
;
TITL mv191 in C2/c
CELL  0.71073  20.2254  13.4796  11.5855   90.000   95.455   90.000
ZERR     8.00   0.0013   0.0007   0.0007    0.000    0.005    0.000
LATT   7
SYMM  - X,   Y, 1/2 - Z
SFAC  C    H    N    FE
UNIT  144  144  32   8
EQIV $1 -x+1, y, -z+3/2
HTAB N1 N1_$1
HTAB N2 N3_$1
HTAB N3 N2_$1
HTAB N4 N4_$1
FMAP   2
PLAN    5
SIZE     0.16   0.19   0.38
ACTA
L.S.  10
TEMP  -140.00
WGHT    0.046900
FVAR       0.30447   0.48978   0.46111
FE1   4    0.371784    0.617493    0.476564    11.00000    0.02240    0.02110 =
         0.01991   -0.00082    0.00241   -0.00011
N1    3    0.435569    0.705605    0.789237    11.00000    0.02033    0.03105 =
         0.02127    0.00057    0.00092   -0.00289
N2    3    0.424690    0.767729    0.876793    11.00000    0.02235    0.02912 =
         0.02396    0.00035    0.00179   -0.00164
N3    3    0.452156    0.872993    0.583644    11.00000    0.02349    0.02745 =
         0.03508    0.00533   -0.00582   -0.00186
N4    3    0.444839    0.943219    0.665276    11.00000    0.02508    0.03007 =
         0.03325    0.00585   -0.00730   -0.00135
C1    1    0.327481    0.705003    0.808763    11.00000    0.01685    0.02514 =
         0.02273    0.00068    0.00035    0.00045
AFIX  43
H1A   2    0.281302    0.690787    0.797950    11.00000   -1.20000
AFIX   0
C2    1    0.377131    0.666403    0.746089    11.00000    0.01981    0.02234 =
         0.01865    0.00452    0.00124    0.00012
C3    1    0.359619    0.768693    0.890465    11.00000    0.02280    0.02388 =
         0.02292    0.00137    0.00282   -0.00014
C4    1    0.332860    0.827140    0.984661    11.00000    0.03594    0.03983 =
         0.03391   -0.01240    0.00614    0.00057
AFIX 137
H4A   2    0.328959    0.784239    1.051967    11.00000   -1.50000
H4B   2    0.288994    0.853396    0.957117    11.00000   -1.50000
H4C   2    0.363014    0.882255    1.006898    11.00000   -1.50000
AFIX   0
C5    1    0.373327    0.593339    0.653267    11.00000    0.02096    0.02297 =
         0.02106    0.00245    0.00300   -0.00028
C6    1    0.313294    0.555850    0.593124    11.00000    0.02123    0.02555 =
         0.02496    0.00060    0.00353   -0.00279
AFIX  43
H6    2    0.269502    0.576059    0.605330    11.00000   -1.20000
AFIX   0
C7    1    0.330425    0.483395    0.512233    11.00000    0.03201    0.02377 =
         0.02764   -0.00206    0.00465   -0.00566
AFIX  43
H7    2    0.300043    0.446372    0.461579    11.00000   -1.20000
AFIX   0
C8    1    0.400835    0.475661    0.519931    11.00000    0.03292    0.02096 =
         0.02660    0.00125    0.00801    0.00279
AFIX  43
H8    2    0.425672    0.432567    0.475607    11.00000   -1.20000
AFIX   0
C9    1    0.427471    0.543887    0.605759    11.00000    0.02232    0.02646 =
         0.02526    0.00386    0.00310    0.00331
AFIX  43
H9    2    0.473322    0.554873    0.627899    11.00000   -1.20000
AFIX   0
C11   1    0.344331    0.898034    0.592021    11.00000    0.02053    0.02683 =
         0.02552    0.00102   -0.00101    0.00130
AFIX  43
H11   2    0.297411    0.894054    0.576915    11.00000   -1.20000
AFIX   0
C12   1    0.391469    0.843961    0.538270    11.00000    0.02166    0.02100 =
         0.02218    0.00574   -0.00233   -0.00070
C13   1    0.379959    0.958963    0.672224    11.00000    0.02828    0.02568 =
         0.02310    0.00295   -0.00165    0.00045
C14   1    0.356543    1.031212    0.756812    11.00000    0.05109    0.04061 =
         0.03100   -0.00978    0.00598   -0.00053
AFIX 137
H14A  2    0.367805    1.006638    0.835848    11.00000   -1.50000
H14B  2    0.308287    1.039063    0.742551    11.00000   -1.50000
H14C  2    0.378139    1.095440    0.747657    11.00000   -1.50000
AFIX   0
C15   1    0.383245    0.767626    0.449708    11.00000    0.02546    0.02159 =
         0.02201    0.00419    0.00192    0.00081
C16   1    0.321343    0.732773    0.393751    11.00000    0.02991    0.02510 =
         0.02310    0.00237   -0.00398    0.00099
AFIX  43
H16   2    0.278518    0.755574    0.408585    11.00000   -1.20000
AFIX   0
C17   1    0.334822    0.658428    0.312417    11.00000    0.04700    0.03053 =
         0.01976    0.00009   -0.00423   -0.00210
AFIX  43
H17   2    0.302681    0.623170    0.263253    11.00000   -1.20000
AFIX   0
C18   1    0.404754    0.645985    0.317408    11.00000    0.05380    0.02744 =
         0.02502   -0.00030    0.01459    0.00219
AFIX  43
H18   2    0.427531    0.601000    0.272018    11.00000   -1.20000
AFIX   0
C19   1    0.434757    0.712396    0.401962    11.00000    0.03289    0.02524 =
         0.03113    0.00398    0.01098   -0.00073
AFIX  43
H19   2    0.481070    0.719088    0.423263    11.00000   -1.20000
AFIX   0
PART    1
H1    2    0.476341    0.705390    0.760929    21.00000   10.08000
PART    2
H2    2    0.458027    0.802581    0.905095   -21.00000   10.08000
PART    3
H3    2    0.493551    0.851920    0.586537    31.00000   10.08000
PART    4
H4    2    0.478557    0.957203    0.708163   -31.00000   10.08000
HKLF    4

REM  mv191 in C2/c
REM R1 =  0.0332 for    2804 Fo > 4sig(Fo)  and  0.0455 for all    3359 data
REM    224 parameters refined using      0 restraints

END

WGHT      0.0469      0.0000

REM Highest difference peak  0.395,  deepest hole -0.316,  1-sigma level  0.066
Q1    1   0.3973  0.5750  0.4437  11.00000  0.05    0.39
Q2    1   0.3784  0.5326  0.4965  11.00000  0.05    0.37
Q3    1   0.3728  0.6992  0.4748  11.00000  0.05    0.37
Q4    1   0.4089  0.5849  0.4600  11.00000  0.05    0.36
Q5    1   0.3799  0.6662  0.4211  11.00000  0.05    0.36
;
_shelx_res_checksum   68678

_shelx_hkl_file
;
   2   0   0  250.46   15.35   0
  -2   0   0  293.57   16.77   0
   2   0   0  285.44   18.87   0
  -2   0   0  248.79   15.46   0
   6   0   0  155.81    9.96   0
  -6   0   0  141.47   10.19   0
   6   0   0  129.80   10.08   0
  -6   0   0  152.98   10.25   0
  -8   0   0  108.87   11.03   0
   8   0   0   80.04    8.62   0
  -8   0   0   83.25    8.84   0
   8   0   0   86.65    9.01   0
 -10   0   0  943.13   13.29   0
 -10   0   0  848.48   12.17   0
  10   0   0 1003.15   14.05   0
  10   0   0  777.16   11.86   0
 -12   0   0  732.31   11.18   0
  12   0   0  686.34   10.90   0
  12   0   0  788.79   11.78   0
 -12   0   0  818.34   13.67   0
  14   0   0   13.76    8.41   0
 -14   0   0   23.15    8.85   0
  14   0   0   33.33   10.10   0
 -14   0   0   19.58    8.41   0
 -16   0   0 1704.18   15.43   0
  16   0   0 1642.71   13.65   0
  16   0   0 2016.41   15.36   0
 -16   0   0 1930.77   17.20   0
 -18   0   0   90.48   12.03   0
  18   0   0   87.62   11.27   0
  18   0   0   67.96   11.29   0
 -18   0   0   66.37    9.30   0
 -20   0   0  722.23   11.63   0
  20   0   0  750.00   11.57   0
  20   0   0  872.07   14.29   0
 -20   0   0  874.23   13.30   0
 -22   0   0    9.94   10.18   0
  22   0   0   12.03   10.22   0
 -22   0   0    5.73   10.95   0
  22   0   0    5.91   10.05   0
 -24   0   0  155.34   11.58   0
  24   0   0  176.40   11.96   0
  24   0   0  150.32   11.56   0
 -24   0   0  201.46   12.37   0
  -1  -1   0 1593.05   32.13   0
  -1   1   0 1625.81   35.32   0
   1   1   0 1596.96   30.10   0
   1  -1   0 1722.09   34.13   0
  -1  -1   0 1944.21   33.90   0
   1   1   0 1863.32   33.95   0
  -3  -1   0 3162.75   30.80   0
   3   1   0 2705.83   27.61   0
  -3   1   0 2718.84   28.51   0
   3  -1   0 2807.10   28.52   0
  -3   1   0 3258.01   34.78   0
  -3  -1   0 2719.85   27.80   0
   3   1   0 3217.47   31.48   0
  -5   1   0  646.87   13.86   0
   5  -1   0  671.00   13.90   0
   5   1   0  640.11   13.92   0
   5   1   0  765.02   15.24   0
  -5  -1   0  646.21   14.16   0
  -5   1   0  777.45   16.88   0
  -5  -1   0  764.44   16.71   0
   5  -1   0  779.68   16.71   0
   7  -1   0   48.95    8.46   0
   7   1   0   40.01    8.82   0
  -7  -1   0   40.97    8.99   0
   7   1   0   45.70   11.05   0
  -7   1   0   48.43   10.45   0
  -7   1   0   42.21   10.52   0
  -7  -1   0   56.02    9.39   0
   7  -1   0   43.06    8.51   0
  -9  -1   0  629.58   11.78   0
   9   1   0  596.07   12.86   0
   9  -1   0  595.86   12.73   0
  -9  -1   0  495.71   12.18   0
   9   1   0  486.11   10.49   0
  -9   1   0  604.73   11.61   0
  -9   1   0  502.66   10.66   0
   9  -1   0  508.59   10.72   0
 -11  -1   0   71.68    8.60   0
  11  -1   0   67.26    8.37   0
  11  -1   0   75.21    8.08   0
 -11  -1   0   80.84    8.83   0
  11   1   0   84.84   10.05   0
 -11   1   0   74.43   10.06   0
 -11   1   0   68.01    8.55   0
  11   1   0   67.58    8.39   0
  13   1   0   81.37    8.47   0
  13  -1   0   88.76    8.36   0
 -13  -1   0  101.72   10.67   0
 -13  -1   0   79.38    8.67   0
  13   1   0   88.39    8.39   0
 -13   1   0   81.00   10.38   0
  13  -1   0   81.26    8.44   0
 -13   1   0   74.20    8.53   0
  15   1   0  229.85    9.58   0
  15   1   0  280.91   11.59   0
 -15   1   0  297.50   10.18   0
 -15  -1   0  234.63    9.63   0
  15  -1   0  271.08   11.24   0
 -15   1   0  261.21   11.10   0
 -15  -1   0  288.55   11.97   0
  15  -1   0  229.48    9.33   0
 -17  -1   0   91.63    9.39   0
 -17   1   0   98.33    9.19   0
  17   1   0   95.72    9.12   0
 -17  -1   0  122.46   11.85   0
  17   1   0  115.90    9.42   0
  17  -1   0   98.05   11.00   0
  17  -1   0   93.40    9.25   0
 -17   1   0  112.57   11.74   0
 -19  -1   0  747.75   14.42   0
 -19   1   0  667.75   11.46   0
  19   1   0  667.38   11.48   0
  19  -1   0  771.96   13.72   0
 -19  -1   0  703.14   11.62   0
  19  -1   0  664.33   11.36   0
  19   1   0  775.01   12.10   0
 -19   1   0  752.03   12.69   0
  21   1   0   83.93   10.15   0
  21  -1   0   87.30   10.22   0
 -21   1   0   89.16   12.44   0
 -21  -1   0   88.80   10.87   0
  21   1   0   94.24   10.27   0
 -21   1   0  104.68   11.05   0
  21  -1   0  101.66   10.25   0
 -21  -1   0   83.63   12.58   0
  23   1   0  203.79   11.46   0
  23  -1   0  178.10   13.51   0
  23  -1   0  200.05   13.45   0
 -23  -1   0  173.20   11.18   0
 -23  -1   0  205.95   14.63   0
 -23   1   0  213.61   14.34   0
 -23   1   0  181.34   13.62   0
  23   1   0  173.36   11.15   0
 -25   1   0    5.07   14.49   0
  25   1   0    4.51   11.71   0
  25  -1   0   10.18   11.65   0
  25   1   0    9.12   11.42   0
 -25   1   0    5.87   15.36   0
 -25  -1   0   -1.42   12.13   0
 -25  -1   0    7.07   14.21   0
   0  -2   0  409.32   15.97   0
   0   2   0  422.26   16.31   0
  -2   2   0   21.38   10.89   0
   2   2   0   19.53   10.70   0
   2   2   0   27.84   11.35   0
  -2  -2   0   22.31   11.30   0
  -2  -2   0   22.73   13.27   0
   2  -2   0   24.17   12.99   0
  -4  -2   0    8.70   10.11   0
   4   2   0    3.31   12.21   0
  -4  -2   0   10.15   10.67   0
   4   2   0    5.64   10.78   0
   4  -2   0    5.73    9.41   0
   6  -2   0   25.27   10.71   0
   6   2   0   32.03    9.56   0
   6   2   0   18.61    9.12   0
  -6  -2   0   22.23    9.46   0
  -6   2   0   20.35   10.20   0
  -6   2   0   22.05    8.62   0
  -6  -2   0   17.72    9.16   0
  -8  -2   0  255.41   10.45   0
   8   2   0  206.74    9.45   0
  -8   2   0  215.62    9.54   0
   8   2   0  245.91   10.37   0
  -8   2   0  268.37   11.51   0
  -8  -2   0  215.00    9.59   0
   8  -2   0  228.33    9.51   0
  10  -2   0   19.46    9.36   0
  10   2   0   19.29    8.31   0
 -10  -2   0    7.55    8.42   0
 -10   2   0   16.13    9.79   0
  10   2   0   21.21    8.47   0
 -10   2   0   17.81    9.69   0
  10  -2   0   12.22    7.94   0
 -10  -2   0   19.34   10.30   0
 -12  -2   0  151.44    9.35   0
  12   2   0  137.13    9.20   0
 -12   2   0  132.52    8.97   0
 -12  -2   0  136.65    8.70   0
  12   2   0  129.34    8.83   0
  12  -2   0  130.78    8.82   0
  12  -2   0  140.48   10.29   0
 -12   2   0  143.97   10.40   0
 -14   2   0   10.54    8.25   0
 -14   2   0    9.52   10.45   0
  14  -2   0   15.20    7.96   0
  14   2   0   14.53    8.36   0
 -14  -2   0    9.28   10.56   0
  14   2   0   12.31    8.43   0
 -14  -2   0   14.69    8.25   0
  14  -2   0    9.12    8.19   0
 -16   2   0   14.42    8.88   0
 -16  -2   0   11.26    9.10   0
  16   2   0    3.65    8.90   0
  16  -2   0    6.65    8.83   0
 -16   2   0   13.51    8.68   0
 -16  -2   0    7.13    8.92   0
  16   2   0    2.03    8.83   0
  16  -2   0    6.34   10.21   0
 -18   2   0   28.53    9.73   0
  18  -2   0   26.03    9.03   0
 -18  -2   0   20.47   11.90   0
  18   2   0   24.11    9.27   0
 -18  -2   0   25.94    9.39   0
  18   2   0   25.74   11.55   0
 -18   2   0   29.24    9.08   0
  18  -2   0   15.06   11.08   0
  20   2   0   53.89   12.19   0
 -20   2   0   49.78   10.36   0
 -20  -2   0   59.62   10.47   0
 -20  -2   0   55.65    9.87   0
 -20   2   0   57.06    9.85   0
  20   2   0   63.45    9.90   0
  20  -2   0   38.79   11.67   0
  22   2   0   18.58   10.60   0
 -22   2   0   32.41   13.48   0
  22   2   0   26.97   10.46   0
 -22  -2   0   25.22   10.59   0
  22  -2   0   22.48   10.42   0
 -22   2   0   28.87   10.54   0
 -22  -2   0   33.48   10.94   0
  24  -2   0   -4.23   11.14   0
 -24   2   0    3.93   11.41   0
  24   2   0    4.46   13.71   0
 -24  -2   0    2.91   14.35   0
 -24   2   0    3.87   14.67   0
 -24  -2   0    9.76   13.78   0
  24   2   0   10.90   11.11   0
  -1   3   0  914.92   18.78   0
  -1  -3   0 1019.73   18.75   0
  -1  -3   0  832.92   16.46   0
   1  -3   0  935.12   17.19   0
   1   3   0 1000.36   18.79   0
   3   3   0  686.94   15.66   0
   3   3   0  811.16   15.33   0
  -3  -3   0  808.77   15.07   0
  -3   3   0  706.43   16.40   0
   3  -3   0  705.71   14.85   0
  -3  -3   0  705.34   14.40   0
   5   3   0  870.24   14.30   0
  -5  -3   0  697.84   13.34   0
  -5  -3   0  832.19   14.33   0
   5  -3   0  755.66   13.72   0
  -5   3   0  656.68   15.10   0
   5   3   0  712.22   14.47   0
   7  -3   0  772.44   14.07   0
   7   3   0  708.12   13.60   0
  -7   3   0  894.68   14.97   0
  -7  -3   0  812.80   13.40   0
  -7  -3   0  688.28   13.86   0
   7   3   0  816.95   13.39   0
  -9   3   0  187.52   10.64   0
  -9  -3   0  184.68   11.48   0
  -9   3   0  162.22    8.82   0
   9   3   0  153.63   10.46   0
   9   3   0  196.90    9.78   0
   9  -3   0  158.94   10.45   0
  -9  -3   0  154.65    9.01   0
 -11  -3   0  949.84   12.89   0
  11   3   0  912.33   12.71   0
 -11  -3   0  815.82   11.74   0
 -11   3   0  925.52   12.98   0
 -11   3   0  852.19   13.43   0
  11   3   0  782.34   11.65   0
  11  -3   0  796.29   13.02   0
 -13   3   0   73.82   10.43   0
  13  -3   0   65.76   10.20   0
 -13  -3   0   72.34    9.02   0
 -13   3   0   65.34   10.26   0
 -13  -3   0   56.94    8.63   0
  13   3   0   60.43   10.34   0
  13   3   0   77.08    8.80   0
 -15   3   0  708.43   13.32   0
  15   3   0  587.62   10.62   0
  15  -3   0  620.01   10.69   0
 -15  -3   0  589.15   12.45   0
 -15   3   0  631.65   10.73   0
 -15  -3   0  679.85   13.19   0
  15   3   0  724.65   11.65   0
 -17  -3   0  135.81    9.66   0
 -17   3   0  150.67    9.47   0
 -17   3   0  159.49   11.81   0
  17   3   0  128.82    9.38   0
  17  -3   0  133.69   10.93   0
  17   3   0  170.81    9.85   0
 -17  -3   0  153.27   12.36   0
  19   3   0  264.68   10.41   0
 -19  -3   0  243.44   10.64   0
 -19  -3   0  232.59   10.28   0
  19  -3   0  199.15   10.04   0
 -19   3   0  233.42   12.00   0
 -19   3   0  237.20   10.91   0
  19   3   0  235.87    9.89   0
 -21  -3   0   74.36   13.37   0
  21   3   0   59.16   12.23   0
  21  -3   0   62.56   10.23   0
 -21   3   0   61.59   13.43   0
  21   3   0   70.91   10.37   0
 -21   3   0   59.24   12.40   0
 -21  -3   0   55.15   10.34   0
  23   3   0   94.10   11.17   0
  23   3   0  102.28   10.80   0
 -23   3   0  104.16   14.59   0
 -23  -3   0  117.98   11.72   0
 -23   3   0  115.48   11.05   0
  23  -3   0   96.17   11.04   0
 -23  -3   0   85.61   11.26   0
  25   3   0   10.87   11.81   0
  25  -3   0    8.71   11.81   0
 -25  -3   0    1.57   11.94   0
 -25   3   0    3.78   11.84   0
   0   4   0  469.90   12.63   0
   0  -4   0  482.03   12.55   0
  -2  -4   0    6.25    8.92   0
  -2   4   0   11.37    9.00   0
   2  -4   0    6.36    8.52   0
  -2  -4   0    4.70    9.65   0
   2   4   0    5.83   11.99   0
   2   4   0    6.40    8.88   0
  -4  -4   0 1212.07   15.27   0
  -4   4   0 1128.70   16.28   0
   4   4   0 1347.60   16.48   0
   4  -4   0 1219.88   17.21   0
   4   4   0 1141.87   16.28   0
  -4  -4   0 1383.75   16.10   0
  -6   4   0   73.30   10.36   0
   6   4   0   94.10    9.48   0
  -6  -4   0   92.62   11.26   0
   6  -4   0   91.39   10.76   0
   6   4   0   76.29    8.81   0
  -6  -4   0   73.61    9.13   0
   8   4   0 3327.76   20.29   0
  -8  -4   0 2649.91   18.47   0
   8   4   0 2557.50   18.04   0
  -8   4   0 2737.43   20.91   0
  -8  -4   0 2994.91   20.91   0
   8  -4   0 3116.92   20.43   0
  -8   4   0 3343.98   22.68   0
 -10   4   0   83.22    8.79   0
  10   4   0   66.40    8.67   0
 -10  -4   0   62.79    8.52   0
  10   4   0   82.99   10.97   0
  10  -4   0   83.73    8.29   0
 -10  -4   0   86.10    8.92   0
  12  -4   0 1790.43   16.05   0
 -12  -4   0 2021.47   15.71   0
  12   4   0 1868.95   15.38   0
  12   4   0 1629.43   13.82   0
 -12  -4   0 1632.81   15.52   0
 -12   4   0 2031.40   17.97   0
  14   4   0    0.58    8.69   0
 -14  -4   0   -0.15    8.68   0
  14   4   0   -5.61    8.54   0
 -14   4   0    1.52    8.12   0
 -14  -4   0   -1.37    8.84   0
  14  -4   0   -5.64   10.06   0
 -14   4   0    1.60    8.17   0
 -16   4   0  161.66    8.94   0
 -16  -4   0  184.58    9.79   0
 -16   4   0  185.18    9.84   0
 -16  -4   0  155.83    9.44   0
  16   4   0  169.59    9.35   0
  16  -4   0  154.31    9.49   0
  16   4   0  185.71    9.78   0
  18  -4   0   12.09    8.98   0
  18   4   0   13.61   11.51   0
 -18   4   0    4.97    9.01   0
 -18   4   0    7.15   11.53   0
  18   4   0   18.22    9.20   0
 -18  -4   0   15.19    9.63   0
 -18  -4   0    8.60    9.51   0
 -20  -4   0   40.24    9.83   0
  20   4   0   34.17    9.93   0
  20  -4   0   25.79    9.62   0
 -20   4   0   20.28    9.75   0
 -20  -4   0   33.55   10.36   0
 -20   4   0   34.26   12.92   0
  20   4   0   43.99    9.75   0
  22   4   0   63.80   10.86   0
 -22  -4   0   49.86   13.69   0
  22  -4   0   41.32   10.48   0
  22   4   0   64.84   10.71   0
 -22  -4   0   58.53   10.95   0
 -22   4   0   53.95   13.95   0
  24   4   0  291.18   12.51   0
 -24  -4   0  280.78   12.99   0
 -24  -4   0  224.54   12.15   0
 -24   4   0  269.63   16.25   0
  24   4   0  217.68   11.76   0
  24  -4   0  235.97   14.55   0
   1  -5   0   28.46    8.88   0
   1   5   0   33.92    9.15   0
  -1  -5   0   30.38   10.94   0
  -1  -5   0   29.03   10.72   0
  -1   5   0   29.46    9.11   0
  -3  -5   0 1144.02   14.45   0
  -3  -5   0  991.41   15.51   0
   3   5   0 1045.69   14.12   0
  -3   5   0 1015.78   16.27   0
   3   5   0 1097.43   14.76   0
   3  -5   0 1048.77   15.62   0
   5   5   0 1186.80   15.60   0
   5  -5   0 1320.15   15.64   0
   5   5   0 1405.69   15.46   0
  -5  -5   0 1385.64   15.13   0
  -5  -5   0 1294.19   14.53   0
  -5   5   0 1317.10   16.40   0
   7   5   0 2240.13   17.25   0
   7   5   0 1812.38   16.97   0
   7  -5   0 1909.94   16.72   0
  -7  -5   0 2068.62   16.95   0
  -7   5   0 1709.18   16.99   0
  -7  -5   0 1876.55   15.85   0
  -9  -5   0 2046.03   17.11   0
  -9   5   0 2100.98   18.81   0
  -9   5   0 2804.07   20.77   0
   9  -5   0 2337.13   18.25   0
  -9  -5   0 2554.59   17.21   0
   9   5   0 2037.99   15.73   0
   9   5   0 2489.30   17.69   0
 -11   5   0  974.67   14.44   0
  11   5   0  784.16   11.45   0
  11  -5   0  838.35   11.77   0
  11   5   0  922.87   12.50   0
 -11  -5   0  934.61   12.35   0
 -11  -5   0  778.06   13.18   0
 -11   5   0  772.53   13.46   0
 -13  -5   0  284.60    9.98   0
  13   5   0  346.07   10.26   0
 -13  -5   0  326.88   10.01   0
  13   5   0  276.52    9.80   0
  13  -5   0  309.69    9.71   0
 -13   5   0  342.08   11.81   0
 -15   5   0  712.20   12.04   0
 -15  -5   0  587.68   11.02   0
 -15  -5   0  653.91   11.37   0
  15  -5   0  563.62   12.48   0
  15   5   0  643.34   11.42   0
  15   5   0  571.03   12.56   0
 -17  -5   0    2.47    9.47   0
 -17   5   0    3.24   11.19   0
  17  -5   0   -1.17    8.86   0
  17   5   0    2.63    9.29   0
  17   5   0   14.17    9.32   0
 -17  -5   0   12.02    9.45   0
 -19   5   0  530.05   14.34   0
 -19  -5   0  495.29   11.87   0
  19   5   0  442.25   13.15   0
  19  -5   0  460.95   11.03   0
  19   5   0  541.72   11.63   0
 -19  -5   0  462.93   11.42   0
  21  -5   0   14.95   10.27   0
 -21  -5   0    5.53   10.59   0
 -21   5   0    0.74   13.43   0
  21   5   0   18.86   10.30   0
  21   5   0   25.66   10.40   0
 -21  -5   0   11.46   10.65   0
 -23   5   0  153.40   15.38   0
  23   5   0  132.84   11.55   0
 -23  -5   0  129.98   11.76   0
  23  -5   0  127.27   11.35   0
  23   5   0  130.00   11.48   0
 -23  -5   0  131.16   12.04   0
   0   6   0  253.71   10.14   0
   0  -6   0  244.72   10.03   0
  -2   6   0   15.95    8.31   0
  -2  -6   0   14.56    8.69   0
  -2  -6   0   14.63   10.11   0
   2  -6   0   14.12    9.96   0
   2   6   0   11.15    8.87   0
   4   6   0   11.25    8.31   0
  -4   6   0   12.68    7.92   0
   4  -6   0    8.17    9.55   0
   4   6   0   12.80    8.68   0
  -4  -6   0    4.99   10.21   0
  -4  -6   0    9.71    8.63   0
   6   6   0   22.20   10.72   0
   6   6   0    4.12   10.00   0
  -6  -6   0    7.34    8.43   0
  -6   6   0   11.52    7.96   0
  -6  -6   0   24.29   10.46   0
   8   6   0   12.76   10.11   0
  -8   6   0   10.52    9.69   0
   8   6   0   12.80    9.12   0
  -8  -6   0   10.24    9.11   0
  -8  -6   0   14.72    8.62   0
   8  -6   0   17.99    9.55   0
  10   6   0  106.51    9.43   0
  10  -6   0  106.03   10.34   0
 -10   6   0   83.50    8.59   0
 -10  -6   0  108.07   11.27   0
  10   6   0   88.40   10.61   0
 -10  -6   0   99.66    8.99   0
 -10   6   0  105.00   10.70   0
 -12  -6   0  230.41    9.88   0
 -12   6   0  205.69    9.37   0
 -12  -6   0  201.67    9.57   0
  12   6   0  199.44    9.60   0
  12   6   0  234.95   10.22   0
  12  -6   0  216.03   11.20   0
 -12   6   0  246.21   11.20   0
 -14  -6   0  198.18    9.90   0
  14   6   0  194.25    9.80   0
 -14   6   0  237.66   11.76   0
 -14  -6   0  239.90    9.93   0
  14  -6   0  221.21   11.68   0
  14   6   0  239.02   12.47   0
 -14   6   0  187.57   11.32   0
  16   6   0  264.71   10.17   0
 -16  -6   0  251.58   12.39   0
 -16  -6   0  212.40   10.13   0
  16  -6   0  255.29    9.90   0
  16   6   0  208.95   11.94   0
 -16   6   0  253.22   10.51   0
 -16   6   0  215.99   11.86   0
  18  -6   0  106.44   11.97   0
  18   6   0  106.46    9.89   0
 -18   6   0  127.45   12.43   0
 -18   6   0   95.56   12.01   0
 -18  -6   0  105.81   10.30   0
 -18  -6   0  122.76   10.22   0
  18   6   0  122.82   12.13   0
  20   6   0   37.36   12.73   0
  20  -6   0   47.36   10.36   0
 -20  -6   0   40.96   10.63   0
 -20   6   0   40.13   13.09   0
 -20  -6   0   27.61   10.88   0
  20   6   0   25.80   10.60   0
 -20   6   0   27.59   12.46   0
 -22   6   0   11.97   13.72   0
  22   6   0   33.87   13.54   0
  22   6   0   18.47   11.07   0
 -22  -6   0   14.93   11.14   0
  22  -6   0   18.89   11.03   0
 -22   6   0   16.96   14.54   0
 -22  -6   0   20.76   11.85   0
  -1  -7   0   51.21   10.00   0
   1  -7   0   58.73    8.28   0
  -1   7   0   65.60    8.49   0
   1   7   0   53.85   10.70   0
  -1  -7   0   59.79    8.68   0
  -3  -7   0  396.08   12.48   0
  -3  -7   0  341.87   10.01   0
  -3   7   0  388.76   10.40   0
   3   7   0  382.54   12.30   0
   3  -7   0  385.29   10.10   0
  -5  -7   0  687.23   11.77   0
  -5   7   0  560.15   12.61   0
   5   7   0  545.56   12.68   0
   5   7   0  674.99   11.78   0
   5  -7   0  594.15   12.46   0
  -5  -7   0  548.37   11.13   0
  -7   7   0  487.30   12.24   0
  -7  -7   0  558.51   11.26   0
   7   7   0  605.11   11.57   0
   7   7   0  501.66   12.28   0
  -7  -7   0  522.18   10.76   0
   9  -7   0  358.31   11.68   0
   9   7   0  401.32   10.62   0
   9   7   0  338.63   11.50   0
  -9   7   0  341.94   11.61   0
  -9  -7   0  338.15   10.11   0
  -9  -7   0  389.83   10.40   0
 -11   7   0  153.02    9.29   0
  11   7   0  109.30    9.20   0
 -11  -7   0  115.44    9.23   0
 -11   7   0  113.25    8.77   0
  11  -7   0  117.88    8.89   0
 -11  -7   0  146.89   11.57   0
  11   7   0  147.69    9.82   0
 -13  -7   0    0.58   11.20   0
  13   7   0    8.08    9.50   0
 -13  -7   0    3.69    9.39   0
  13  -7   0    0.36   10.56   0
 -13   7   0    4.69   10.66   0
  13   7   0    1.42   11.15   0
 -13   7   0   10.33   10.65   0
  15   7   0   22.22    9.79   0
 -15  -7   0   12.73    9.62   0
 -15   7   0   14.89   10.95   0
  15  -7   0   38.71   11.27   0
 -15  -7   0   28.86    9.86   0
  15   7   0    9.04    9.43   0
 -15   7   0   19.33    9.23   0
  17   7   0   29.49    9.99   0
 -17  -7   0   24.99   10.29   0
 -17  -7   0   16.79    9.61   0
  17   7   0   26.89    9.90   0
 -17   7   0   33.44   11.93   0
 -17   7   0   25.09   11.92   0
  17  -7   0   17.27    9.77   0
 -19  -7   0   20.35   10.41   0
 -19   7   0   19.65   12.27   0
 -19  -7   0   27.56   12.57   0
  19   7   0   29.03   10.25   0
  19  -7   0   12.94   12.30   0
 -19   7   0   30.78   12.51   0
  19   7   0   13.48   10.25   0
 -21  -7   0   10.00   11.10   0
 -21   7   0   -2.66   10.91   0
  21   7   0    8.66   10.94   0
 -21   7   0   12.19   13.91   0
 -21  -7   0   -3.34   11.35   0
  21  -7   0   -6.52   10.58   0
  21   7   0   -5.98   10.84   0
 -23   7   0   55.38   15.42   0
 -23  -7   0   50.48   15.17   0
  23   7   0   52.86   11.81   0
 -23  -7   0   42.74   11.93   0
  23  -7   0   49.88   12.14   0
 -23   7   0   42.45   14.39   0
  23   7   0   43.81   11.82   0
   0   8   0  975.13   13.03   0
   0  -8   0  924.84   12.55   0
   0  -8   0  796.01   13.23   0
   2  -8   0    4.25    7.98   0
  -2   8   0    5.88    9.92   0
  -2  -8   0    4.54    8.09   0
   2   8   0    2.81    8.81   0
  -2  -8   0    8.55    8.55   0
  -4  -8   0 1424.25   15.60   0
   4  -8   0 1323.98   15.07   0
   4   8   0 1455.29   14.31   0
  -4  -8   0 1135.98   14.46   0
  -4   8   0 1326.52   14.18   0
  -6  -8   0   12.20    8.87   0
  -6  -8   0   16.62    8.28   0
   6   8   0   16.75   11.09   0
   6   8   0   20.60   10.19   0
   6  -8   0   11.49    9.99   0
  -6   8   0   16.66    8.23   0
  -8  -8   0 1188.28   13.11   0
  -8   8   0 1241.72   15.06   0
   8   8   0 1131.54   14.31   0
  -8  -8   0 1388.28   14.00   0
   8   8   0 1476.17   14.37   0
 -10  -8   0   16.67    9.23   0
  10   8   0   16.39    8.89   0
  10   8   0   14.62    9.31   0
 -10  -8   0   18.87   10.89   0
 -10   8   0   12.83   10.02   0
  10  -8   0    9.61    8.68   0
  12   8   0  526.21   11.43   0
  12   8   0  445.60   10.43   0
 -12   8   0  408.11   12.49   0
 -12  -8   0  442.98   10.59   0
 -12   8   0  525.98   11.40   0
 -12  -8   0  508.94   11.40   0
  12  -8   0  455.24   12.58   0
 -14   8   0   24.25    9.30   0
 -14   8   0   13.35    8.94   0
  14   8   0   19.21   12.21   0
 -14  -8   0   25.37    9.72   0
 -14  -8   0   18.05    9.71   0
  14   8   0   23.48    9.47   0
  14  -8   0   20.07    9.04   0
  16   8   0   71.29   10.19   0
  16  -8   0   58.12    9.70   0
  16   8   0   60.93    9.83   0
 -16   8   0   69.28   11.98   0
 -16   8   0   50.37   11.89   0
 -16  -8   0   57.54    9.89   0
 -16  -8   0   54.77   10.44   0
 -18  -8   0   84.63   10.35   0
  18   8   0   70.02   12.24   0
 -18   8   0   74.14   13.01   0
 -18  -8   0   82.77   10.28   0
  18  -8   0   70.52   10.45   0
 -18   8   0   80.01   12.92   0
  18   8   0   76.34   10.43   0
  20  -8   0   72.00   11.06   0
 -20   8   0   80.14   13.86   0
 -20  -8   0   85.63   11.34   0
  20   8   0   65.68   10.77   0
 -20   8   0   59.76   13.31   0
 -20  -8   0   66.02   11.13   0
  20   8   0   70.02   13.48   0
 -22  -8   0   81.89   12.12   0
  22  -8   0   68.03   11.52   0
  22   8   0   74.42   14.50   0
 -22   8   0   75.43   14.74   0
  22   8   0   66.29   11.58   0
 -22  -8   0   38.94   14.53   0
 -22   8   0   58.02   14.26   0
  -1  -9   0  353.93   10.23   0
  -1   9   0  355.16   11.70   0
   1  -9   0  347.67   10.06   0
  -1  -9   0  324.66    9.86   0
   1   9   0  376.76   10.45   0
   3  -9   0  271.43    9.45   0
  -3  -9   0  242.40    9.55   0
  -3   9   0  269.12    9.74   0
  -3  -9   0  279.97    9.94   0
   3   9   0  276.40    9.98   0
   5   9   0  216.22    9.99   0
  -5   9   0  215.43   11.10   0
  -5  -9   0  204.18    9.70   0
   5  -9   0  204.24    9.30   0
  -5  -9   0  179.38   11.02   0
  -7  -9   0  289.60   12.28   0
   7  -9   0  274.56   11.24   0
  -7   9   0  281.71   11.51   0
   7   9   0  302.88   10.45   0
  -7  -9   0  264.84    9.72   0
  -9  -9   0   80.82    9.70   0
  -9   9   0   77.11    8.92   0
   9   9   0   94.92    9.62   0
   9  -9   0   82.68    9.07   0
  -9  -9   0   87.39    9.14   0
   9   9   0   63.98   10.84   0
  11  -9   0  237.25    9.98   0
 -11   9   0  211.91   11.60   0
 -11  -9   0  245.04   10.44   0
  11   9   0  266.68   10.63   0
  11   9   0  201.18    9.58   0
 -11  -9   0  211.90    9.89   0
 -13   9   0  209.66   12.04   0
  13   9   0  152.12    9.79   0
  13  -9   0  162.04    9.96   0
 -13  -9   0  189.33   10.68   0
 -13  -9   0  149.36    9.94   0
  13   9   0  186.30   10.75   0
 -13   9   0  147.13   11.84   0
 -15  -9   0  136.34   10.73   0
  15   9   0  122.50   10.17   0
 -15   9   0  115.66   10.05   0
  15  -9   0  111.29   10.21   0
 -15   9   0  141.28   12.45   0
  15   9   0  132.58   10.72   0
 -15  -9   0  124.82   10.04   0
  17  -9   0  256.48   10.84   0
 -17  -9   0  239.52   11.02   0
 -17  -9   0  251.26   11.33   0
  17   9   0  236.41   11.18   0
 -17   9   0  285.61   13.68   0
 -17   9   0  231.90   13.13   0
  17   9   0  260.77   11.43   0
  19   9   0   80.40   11.39   0
  19  -9   0   55.79   11.00   0
  19   9   0   44.85   10.71   0
 -19   9   0   77.07   13.53   0
 -19   9   0   57.65   13.26   0
 -19  -9   0   72.74   11.36   0
 -19  -9   0   53.62   13.37   0
  21   9   0   56.06   11.87   0
  21   9   0   31.22   14.11   0
  21  -9   0   39.26   14.29   0
 -21   9   0   34.38   14.19   0
 -21   9   0   47.78   14.55   0
 -21  -9   0   51.97   11.79   0
 -21  -9   0   32.03   12.04   0
   0  10   0   10.80   10.72   0
   0 -10   0   10.14    8.56   0
   0 -10   0   16.38   10.15   0
  -2 -10   0   20.91    8.77   0
  -2 -10   0   19.33    8.46   0
   2  10   0   18.16    8.92   0
  -2  10   0   18.59    8.84   0
   2 -10   0   17.86   10.48   0
  -4 -10   0   14.13    8.66   0
   4  10   0   17.55    9.23   0
  -4 -10   0   18.01    9.09   0
  -4  10   0   16.57    8.86   0
   4 -10   0   17.18    8.50   0
  -6  10   0   78.65   10.98   0
  -6 -10   0   93.98    9.40   0
   6 -10   0   78.78   10.72   0
   6  10   0   96.36    9.83   0
  -6 -10   0   71.23    9.10   0
  -8 -10   0   61.80   11.38   0
  -8  10   0   63.42   11.08   0
  -8 -10   0   65.25    9.58   0
   8  10   0   65.77    9.80   0
 -10 -10   0  116.39    9.67   0
  10  10   0  134.84   10.41   0
 -10  10   0  111.00   11.53   0
  10 -10   0  125.29   11.64   0
 -10 -10   0  125.65   10.33   0
  10  10   0  120.15    9.65   0
  12  10   0   39.39    9.60   0
 -12  10   0   27.01   11.39   0
  12 -10   0   32.03   11.63   0
  12  10   0   25.56   10.12   0
 -12 -10   0   11.60    9.75   0
 -12 -10   0   29.43   10.04   0
 -14  10   0   68.95   12.13   0
  14  10   0   58.10   10.86   0
 -14 -10   0   64.25   12.88   0
 -14 -10   0   55.67   12.25   0
 -14  10   0   50.18   11.84   0
  14  10   0   49.93   10.16   0
  14 -10   0   54.48   12.00   0
 -16 -10   0   12.02   13.41   0
  16  10   0   26.75   11.01   0
  16  10   0   21.27   10.35   0
 -16  10   0   16.87   12.47   0
 -16 -10   0   16.65   10.38   0
 -16  10   0   21.59   12.47   0
  16 -10   0   18.02   12.54   0
 -18 -10   0    8.86   10.86   0
  18 -10   0    6.31   10.75   0
 -18  10   0    1.88   13.43   0
  18  10   0   13.39   10.89   0
 -18  10   0   -4.48   13.13   0
 -18 -10   0    5.71   11.16   0
  18  10   0   11.68   13.56   0
 -20  10   0   51.09   14.78   0
  20  10   0   33.47   11.86   0
 -20 -10   0   40.40   12.10   0
 -20 -10   0   38.01   11.65   0
  20  10   0   39.11   11.75   0
  20 -10   0   53.08   11.58   0
 -20  10   0   43.55   14.43   0
   1  11   0   20.13    9.10   0
  -1  11   0   23.10    8.90   0
   1 -11   0   21.51    8.78   0
  -1 -11   0   28.92    9.02   0
  -1 -11   0   26.62   10.62   0
   1 -11   0   10.52   10.84   0
  -3 -11   0   18.61    8.97   0
  -3 -11   0   20.82   11.12   0
   3 -11   0   35.91   10.94   0
   3  11   0   24.84    9.16   0
  -3  11   0   23.60   11.19   0
   5 -11   0   71.93   11.16   0
  -5  11   0   78.91   11.44   0
   5  11   0   80.90    9.80   0
  -5 -11   0   94.62    9.62   0
  -5 -11   0   75.41    9.24   0
   7 -11   0   14.03   10.97   0
  -7 -11   0   10.50    9.07   0
   7  11   0   14.72    9.75   0
  -7  11   0   14.00    9.14   0
  -7 -11   0    7.34    9.43   0
   9  11   0   40.07   12.45   0
  -9 -11   0   38.30    9.59   0
  -9  11   0   41.37   11.64   0
  -9 -11   0   59.28   12.27   0
 -11  11   0  127.38   12.44   0
  11 -11   0  139.95   10.07   0
  11  11   0  152.99   10.88   0
 -11 -11   0  115.13   12.35   0
 -11 -11   0  152.79   10.80   0
  11  11   0  136.06   10.09   0
 -13 -11   0   30.96   10.88   0
  13  11   0   19.83   10.16   0
 -13  11   0   22.44   12.19   0
 -13 -11   0   29.17   12.38   0
  13  11   0   20.33   11.04   0
  13 -11   0   29.63   10.10   0
  15 -11   0   18.93   10.29   0
 -15  11   0   18.35   13.06   0
  15  11   0    1.67   12.92   0
 -15 -11   0   10.81   10.40   0
 -15  11   0    5.60   12.71   0
 -15 -11   0    7.38   11.07   0
  15  11   0   15.84   13.70   0
 -17  11   0   13.64   13.53   0
 -17 -11   0    5.56   10.91   0
 -17  11   0    3.80   13.41   0
  17  11   0   13.08   11.90   0
  17  11   0    1.84   10.94   0
  17 -11   0   10.83   10.88   0
 -17 -11   0   10.16   11.51   0
 -19 -11   0   14.69   12.18   0
  19  11   0    9.11   11.61   0
  19 -11   0   19.70   11.76   0
 -19  11   0    7.76   14.33   0
 -19  11   0   10.56   14.36   0
 -19 -11   0   10.20   11.80   0
  19  11   0    6.17   11.77   0
   0  12   0  736.89   12.05   0
   0 -12   0  724.06   11.77   0
   0 -12   0  609.73   13.43   0
  -2  12   0   67.03   11.92   0
  -2 -12   0   89.88   11.73   0
   2  12   0   80.30    9.95   0
   2 -12   0   70.83   11.25   0
   2 -12   0   93.16    9.65   0
  -2 -12   0   94.27   11.40   0
   4 -12   0  156.13    9.92   0
   4  12   0  161.78   12.29   0
  -4 -12   0  140.66    9.94   0
  -4 -12   0  142.54   12.18   0
  -4  12   0  175.56   10.07   0
  -6 -12   0   42.33    9.86   0
  -6  12   0   33.54   11.77   0
   6  12   0   46.26   10.11   0
  -6 -12   0   31.00    9.63   0
   6 -12   0   39.73    9.27   0
  -8 -12   0    9.26    9.69   0
   8  12   0    8.16   10.02   0
  -8 -12   0   13.73    9.84   0
  -8  12   0    5.47   12.03   0
 -10 -12   0   68.09   12.35   0
 -10 -12   0   85.51   10.73   0
 -10  12   0   71.58   10.08   0
  10  12   0   82.07   10.59   0
  10 -12   0   68.58   12.33   0
  12  12   0  206.48   11.36   0
  12 -12   0  183.26   13.19   0
 -12 -12   0  194.01   11.35   0
 -12  12   0  171.94   13.11   0
 -12 -12   0  169.97   13.23   0
 -14 -12   0   69.60   11.51   0
 -14 -12   0   62.17   10.91   0
  14  12   0   64.73   10.83   0
  14  12   0   74.07   11.76   0
 -14  12   0   76.43   13.42   0
 -14  12   0   52.68   13.31   0
  14 -12   0   67.89   10.83   0
  16 -12   0  238.20   12.14   0
 -16 -12   0  234.48   12.43   0
 -16  12   0  274.32   12.43   0
  16  12   0  261.35   12.51   0
 -16  12   0  199.39   14.72   0
  16  12   0  217.50   11.74   0
 -16 -12   0  209.94   11.98   0
 -18 -12   0    6.12   11.87   0
  18  12   0   12.68   12.15   0
  18  12   0    7.65   12.44   0
 -18  12   0   11.46   14.66   0
  -1  13   0  257.53   10.87   0
   1  13   0  268.45   10.70   0
   1 -13   0  220.51   12.61   0
  -1 -13   0  246.18   10.64   0
   1 -13   0  251.27   10.53   0
  -1 -13   0  262.05   10.68   0
   3  13   0  105.65   10.26   0
  -3 -13   0  102.00   10.05   0
  -3 -13   0  117.46   10.04   0
   3 -13   0  103.40   12.22   0
  -3  13   0  105.23   10.52   0
   3 -13   0  112.89   12.06   0
   5  13   0  400.29   13.34   0
  -5 -13   0  331.84   11.08   0
  -5 -13   0  374.37   11.19   0
   5 -13   0  355.75   13.34   0
  -5  13   0  343.14   11.51   0
  -7 -13   0   57.13   10.28   0
   7 -13   0   67.59   10.29   0
   7  13   0   80.68   10.73   0
  -7 -13   0   69.85   10.54   0
  -7  13   0   65.99   10.34   0
  -9 -13   0  177.21   11.04   0
   9  13   0  174.93   11.16   0
  -9  13   0  166.60   13.45   0
  -9 -13   0  150.41   10.86   0
  11 -13   0  137.65   13.50   0
 -11 -13   0  145.13   11.76   0
 -11 -13   0  131.52   11.16   0
 -11  13   0  128.06   13.71   0
  11  13   0  152.49   11.72   0
 -13  13   0   27.62   13.43   0
  13 -13   0   14.43   13.70   0
  13  13   0   23.79   11.66   0
 -13 -13   0   20.58   11.40   0
 -13 -13   0   21.25   11.56   0
 -15 -13   0  183.88   12.42   0
  15 -13   0  206.02   14.90   0
 -15  13   0  187.39   15.11   0
 -15 -13   0  213.32   12.67   0
  15  13   0  249.43   12.71   0
 -15  13   0  239.40   15.11   0
   0 -14   0  139.45   10.58   0
   0 -14   0  121.64   12.56   0
   0  14   0  154.08   10.88   0
  -2  14   0   24.72   10.03   0
   2 -14   0   17.46   12.41   0
  -2 -14   0   15.93   10.13   0
   2 -14   0   19.78   12.56   0
  -2 -14   0    7.21   12.46   0
   2  14   0   19.99   10.32   0
   4 -14   0  267.30   11.27   0
   4  14   0  281.62   13.62   0
  -4  14   0  295.95   13.70   0
   4 -14   0  238.44   13.48   0
  -4 -14   0  250.21   11.03   0
  -4 -14   0  270.85   11.34   0
  -6  14   0   26.95   10.67   0
  -6 -14   0   28.40   13.08   0
   6 -14   0   26.43   10.54   0
   6  14   0   36.94   13.20   0
  -6 -14   0   38.56   10.42   0
   8 -14   0  300.04   11.70   0
  -8  14   0  291.45   14.28   0
  -8 -14   0  275.75   11.66   0
   8  14   0  335.78   12.07   0
  -8 -14   0  297.53   11.83   0
  10 -14   0    4.52   10.85   0
 -10 -14   0   17.33   11.40   0
 -10 -14   0   23.84   11.44   0
 -10  14   0    7.43   13.21   0
  10  14   0   10.82   11.19   0
 -12 -14   0   75.93   14.21   0
  12 -14   0   89.74   14.06   0
 -12  14   0  102.01   11.85   0
 -12 -14   0  112.36   12.26   0
  12  14   0  102.99   12.29   0
 -14 -14   0   16.72   12.35   0
  14  14   0   24.94   12.46   0
  14 -14   0   18.95   12.02   0
 -14  14   0   19.55   14.61   0
 -14 -14   0    5.10   11.69   0
  -1  15   0   42.79   10.97   0
   1 -15   0   30.96   10.74   0
  -1 -15   0   23.77   13.13   0
   1 -15   0   28.17   13.19   0
   1  15   0   38.57   13.21   0
  -1 -15   0   32.13   10.55   0
   3 -15   0   59.41   13.14   0
   3  15   0   62.47   11.27   0
  -3 -15   0   54.68   11.01   0
  -3  15   0   51.20   13.55   0
   3 -15   0   48.86   10.70   0
  -3 -15   0   44.75   10.74   0
  -5  15   0   14.17   13.62   0
  -5 -15   0   14.44   10.83   0
   5 -15   0   13.76   10.61   0
   5 -15   0   -0.73   12.93   0
  -5 -15   0   10.32   10.88   0
   5  15   0   10.07   10.95   0
  -7 -15   0   19.24   11.07   0
  -7  15   0   14.91   11.12   0
   7 -15   0    7.15   11.02   0
   7  15   0   15.93   11.21   0
  -7 -15   0  -21.23   11.31   0
  -9  15   0    0.01   14.05   0
   9  15   0    7.74   11.89   0
  -9 -15   0    0.51   11.54   0
  -9 -15   0   35.21   14.40   0
  11 -15   0   -1.37   14.52   0
 -11 -15   0   12.46   12.27   0
  11  15   0   -6.75   11.99   0
 -11 -15   0   10.32   14.58   0
 -11  15   0   -0.87   11.88   0
   0  16   0   12.79   13.86   0
   0 -16   0    6.47   13.86   0
   0 -16   0   -1.98   11.36   0
  -2  16   0    0.19   14.34   0
  -2 -16   0    5.33   11.39   0
   2 -16   0    1.06   11.14   0
   2 -16   0    2.26   11.29   0
   2  16   0  -10.28   11.28   0
  -2 -16   0   -3.57   11.45   0
   4 -16   0   27.47   13.89   0
   4  16   0   15.31   11.75   0
  -4 -16   0   16.80   11.64   0
  -4 -16   0   15.96   11.13   0
  -4  16   0   22.18   14.22   0
   4 -16   0   16.31   13.81   0
  -6 -16   0    5.76   11.54   0
   6 -16   0    7.11   14.29   0
  -6 -16   0    0.76   14.37   0
   6 -16   0   12.74   14.33   0
  -6  16   0   11.55   14.45   0
   6  16   0   12.70   11.87   0
  -8  16   0    4.95   12.24   0
   8  16   0   11.30   12.03   0
  -8 -16   0   12.53   14.72   0
  -8 -16   0    5.33   14.70   0
   1 -17   0   10.47   12.06   0
  -1  17   0   10.91   12.06   0
   1  17   0    8.89   12.30   0
  -1 -17   0   29.17   11.92   0
  -1 -17   0   11.67   14.70   0
   1 -17   0   -0.81   11.91   0
 -25   1   1   46.54   14.36   0
 -25   1   1   45.46   15.45   0
  25   1  -1   40.94   14.45   0
  25   1  -1   34.40   11.85   0
  25  -1  -1   49.59   11.97   0
  25  -1  -1   40.66   11.65   0
 -25  -1   1   28.29   15.21   0
 -25  -1   1   54.41   11.66   0
 -23   1   1   12.66   10.71   0
  23   1  -1   12.86   10.64   0
 -23   1   1   15.76   11.63   0
 -23  -1   1   17.36   11.32   0
  23  -1  -1    7.71   10.54   0
 -23  -1   1   18.86   10.84   0
  23  -1  -1   19.08   13.12   0
  23   1  -1   20.13   10.64   0
 -21  -1   1  101.67   10.19   0
  21  -1  -1  120.78   12.43   0
 -21  -1   1  122.93   13.41   0
  21  -1  -1  102.01   12.43   0
  21   1  -1   94.99   10.23   0
 -21   1   1  120.47   11.13   0
  21   1  -1  118.46   12.63   0
 -21   1   1  124.37   10.47   0
 -19  -1   1   81.27   12.34   0
  19  -1  -1   62.67   11.48   0
 -19  -1   1   57.15    9.80   0
 -19   1   1   55.30   11.57   0
  19  -1  -1   72.81    9.36   0
  19   1  -1   73.55    9.60   0
  19   1  -1   55.32   11.62   0
 -19   1   1   72.87   12.28   0
  17  -1  -1  264.06   11.91   0
  17  -1  -1  208.10   11.53   0
  17   1  -1  254.49   11.89   0
 -17  -1   1  257.33   10.48   0
 -17  -1   1  223.81    9.83   0
 -17   1   1  269.38   12.74   0
  17   1  -1  208.54   11.43   0
 -17   1   1  215.20    9.89   0
  15   1  -1  210.30   11.31   0
  15  -1  -1  186.00    9.13   0
  15  -1  -1  224.99    9.42   0
 -15   1   1  207.63    9.49   0
 -15  -1   1  199.85   11.30   0
 -15   1   1  233.57   11.75   0
 -15  -1   1  220.05   11.84   0
  15   1  -1  192.88    9.27   0
  13   1  -1  300.94   11.38   0
  13   1  -1  245.62    9.26   0
 -13  -1   1  279.23   11.36   0
 -13   1   1  293.90   11.93   0
  13  -1  -1  276.62    9.64   0
 -13  -1   1  259.14    9.46   0
 -13   1   1  272.56    9.27   0
  13  -1  -1  248.24    9.22   0
 -11   1   1  242.24    9.16   0
  11   1  -1  282.00   11.28   0
 -11   1   1  279.91   11.96   0
  11  -1  -1  257.15    9.14   0
  11   1  -1  236.96    9.21   0
 -11  -1   1  254.25    9.42   0
  11  -1  -1  275.49    9.86   0
 -11  -1   1  275.54   11.74   0
   9  -1  -1  202.43   10.77   0
   9   1  -1  207.11   11.45   0
  -9  -1   1  176.84    9.04   0
  -9   1   1  172.18   10.63   0
   9  -1  -1  184.49   10.44   0
  -9  -1   1  228.44    9.99   0
  -9   1   1  215.46   11.41   0
   9   1  -1  181.98   10.41   0
  -7   1   1 1140.00   14.11   0
  -7   1   1 1266.82   19.20   0
  -7  -1   1 1075.09   14.49   0
  -7  -1   1 1277.29   18.46   0
   7   1  -1 1082.53   14.06   0
   7   1  -1 1310.64   17.17   0
   7  -1  -1 1331.83   18.60   0
   7  -1  -1 1094.99   15.40   0
  -5   1   1 1098.24   21.24   0
   5   1  -1  943.98   16.47   0
  -5  -1   1 1087.24   18.02   0
   5  -1  -1  983.10   15.10   0
   5   1  -1 1073.87   18.27   0
  -5   1   1  995.20   15.40   0
   5  -1  -1 1104.67   20.83   0
  -5  -1   1 1034.22   15.80   0
   3  -1  -1 3206.68   27.66   0
  -3  -1   1 2967.95   29.60   0
  -3   1   1 3605.80   53.82   0
   3  -1  -1 3505.26   54.39   0
   3   1  -1 2933.10   27.94   0
   3   1  -1 3283.92   32.96   0
  -3  -1   1 3265.23   33.30   0
  -1  -1   1 7991.42   54.33   0
   1   1  -1 8189.81   56.62   0
   1   1   1  341.99   16.02   0
  -1   1  -1  283.71   16.60   0
  -1  -1  -1  272.72   14.86   0
  -1  -1  -1  350.88   16.07   0
   3   1   1 2473.13   25.00   0
  -3  -1  -1 2435.29   25.12   0
  -3   1  -1 2629.02   30.67   0
  -3  -1  -1 3079.12   26.62   0
   3   1   1 2976.76   26.34   0
  -3   1  -1 3198.70   27.29   0
   3  -1   1 2612.43   30.43   0
  -5  -1  -1   95.91   10.29   0
   5   1   1  109.83   12.07   0
   5   1   1   89.77   10.30   0
   5  -1   1  103.47    9.79   0
  -5   1  -1   90.66   11.54   0
  -5  -1  -1  105.08   10.33   0
   5  -1   1   90.16    9.74   0
  -5   1  -1  108.83    9.81   0
   7   1   1  300.58   12.30   0
  -7  -1  -1  358.26   10.71   0
   7  -1   1  339.59   10.44   0
  -7   1  -1  311.36   10.61   0
   7  -1   1  369.65   10.73   0
  -7  -1  -1  306.60   12.32   0
  -7   1  -1  368.41   12.30   0
   7   1   1  371.05   10.63   0
  -9  -1  -1 1259.02   13.81   0
  -9  -1  -1 1379.14   15.06   0
  -9   1  -1 1383.53   14.91   0
   9   1   1 1130.02   13.79   0
   9  -1   1 1250.47   15.08   0
   9   1   1 1385.68   14.66   0
  -9   1  -1 1282.45   13.77   0
   9  -1   1 1351.40   15.60   0
  11  -1   1 1772.14   15.95   0
 -11   1  -1 1487.73   14.25   0
  11   1   1 1622.48   14.74   0
  11   1   1 1504.91   13.94   0
  11  -1   1 1412.20   15.14   0
 -11  -1  -1 1685.96   15.31   0
 -11  -1  -1 1472.10   14.19   0
 -11   1  -1 1671.59   15.12   0
 -13   1  -1  513.70   11.96   0
 -13  -1  -1  462.28   10.51   0
  13  -1   1  466.50   10.15   0
 -13  -1  -1  435.93   10.11   0
 -13   1  -1  419.23    9.93   0
  13   1   1  475.74   11.84   0
  13  -1   1  397.00    9.84   0
  13   1   1  380.16   10.12   0
  15  -1   1 1135.30   13.98   0
 -15   1  -1 1103.21   14.46   0
 -15  -1  -1  927.02   12.07   0
  15   1   1 1076.63   12.36   0
 -15  -1  -1 1100.00   12.86   0
 -15   1  -1  927.83   11.86   0
  15   1   1  872.27   13.14   0
  15  -1   1  892.01   11.74   0
  17   1   1   23.74    9.01   0
  17  -1   1   27.50    8.83   0
 -17   1  -1   17.00    8.88   0
  17  -1   1   21.72    8.79   0
 -17  -1  -1   26.75    9.44   0
 -17  -1  -1   19.23    8.92   0
  17   1   1   24.69    9.01   0
 -17   1  -1   18.36    9.16   0
 -19   1  -1   93.91    9.67   0
  19   1   1   94.36    9.90   0
  19   1   1  111.46   11.78   0
 -19  -1  -1   91.03    9.67   0
  19  -1   1  102.24   11.60   0
  19  -1   1   82.62    9.69   0
 -19   1  -1  106.01   12.32   0
 -19  -1  -1  105.13   10.33   0
  21   1   1   15.00    9.84   0
  21   1   1    3.96    9.97   0
 -21  -1  -1    6.94    9.93   0
 -21   1  -1   12.21   10.47   0
  21  -1   1    4.42   12.31   0
 -21  -1  -1   10.51   10.51   0
 -21   1  -1    1.55   10.05   0
  21  -1   1    4.37    9.90   0
  23   1   1    0.95   10.54   0
  23  -1   1    8.41   10.52   0
 -23   1  -1    3.54   13.49   0
 -23   1  -1   10.76   13.82   0
  23   1   1    6.50   10.71   0
  23  -1   1   -2.12   11.09   0
 -23  -1  -1    7.08   13.86   0
 -23  -1  -1    5.06   10.59   0
 -25  -1  -1   32.63   15.29   0
 -25  -1  -1   22.38   11.76   0
  25   1   1   27.81   11.77   0
  25   1   1   21.38   11.57   0
  25  -1   1   13.95   11.80   0
 -25   1  -1   27.74   11.58   0
 -25   1  -1   20.45   12.58   0
  24   2  -1   34.26   11.24   0
  24  -2  -1   35.23   11.15   0
 -24   2   1   43.04   12.12   0
  24   2  -1   39.01   13.92   0
 -24  -2   1   32.50   14.72   0
 -24  -2   1   32.62   11.51   0
 -24   2   1   34.29   11.21   0
  22   2  -1  380.52   11.38   0
 -22  -2   1  407.43   11.56   0
  22   2  -1  481.57   12.08   0
 -22   2   1  417.20   13.55   0
 -22  -2   1  445.30   14.74   0
  22  -2  -1  401.12   11.35   0
 -22   2   1  487.13   15.11   0
  20  -2  -1  349.40   10.35   0
 -20  -2   1  345.01   10.93   0
 -20   2   1  413.59   12.07   0
  20   2  -1  400.83   11.26   0
 -20   2   1  363.21   10.76   0
 -20  -2   1  380.53   11.72   0
  20  -2  -1  403.32   13.00   0
  20   2  -1  332.58   10.83   0
  18   2  -1  593.93   12.98   0
  18  -2  -1  617.44   13.00   0
 -18   2   1  776.25   15.00   0
  18   2  -1  751.71   12.14   0
 -18   2   1  675.05   11.17   0
 -18  -2   1  722.37   14.03   0
  18  -2  -1  761.02   13.83   0
 -18  -2   1  668.42   11.53   0
 -16  -2   1  576.09   13.41   0
  16   2  -1  512.65   10.72   0
 -16   2   1  522.79   10.66   0
 -16  -2   1  524.77   12.47   0
  16  -2  -1  504.16   10.46   0
 -16   2   1  629.27   12.28   0
  16   2  -1  617.94   11.28   0
  16  -2  -1  623.35   12.93   0
 -14  -2   1  461.68   10.90   0
  14   2  -1  514.85   12.56   0
 -14  -2   1  419.52   10.04   0
 -14   2   1  479.61   11.21   0
  14  -2  -1  496.22   10.70   0
  14   2  -1  435.68   10.16   0
  14  -2  -1  440.55    9.83   0
 -14   2   1  419.96    9.90   0
 -12  -2   1  114.76    9.03   0
 -12  -2   1  103.86    8.81   0
  12   2  -1  126.73    8.93   0
  12   2  -1  104.20    8.65   0
 -12   2   1  129.87   10.96   0
  12  -2  -1  123.32   10.41   0
  12  -2  -1  101.26    8.43   0
 -12   2   1  109.62    8.41   0
  10  -2  -1  982.18   13.82   0
  10   2  -1 1201.43   14.27   0
 -10  -2   1  986.72   12.64   0
 -10   2   1 1015.57   14.23   0
 -10   2   1 1145.45   16.51   0
  10   2  -1 1030.03   12.80   0
 -10  -2   1 1159.37   14.23   0
  10  -2  -1 1192.57   16.18   0
  -8   2   1  199.34    9.36   0
  -8   2   1  239.94   11.54   0
   8   2  -1  218.46    9.35   0
   8  -2  -1  201.51    9.27   0
   8  -2  -1  230.86   11.41   0
   8   2  -1  228.96   10.50   0
  -8  -2   1  195.85   11.05   0
  -8  -2   1  224.88   12.19   0
   6  -2  -1 2260.29   18.70   0
   6   2  -1 2417.03   21.72   0
  -6  -2   1 2274.48   21.38   0
  -6  -2   1 2071.33   18.66   0
  -6   2   1 2473.08   26.64   0
   6   2  -1 2114.57   18.40   0
   4   2  -1  516.98   15.77   0
   4   2  -1  457.78   13.22   0
  -4  -2   1  493.88   13.58   0
  -4  -2   1  444.83   13.30   0
  -4   2   1  425.25   18.24   0
   2   2  -1 2121.03   24.15   0
   2  -2  -1 2077.22   35.06   0
  -2   2   1 2102.24   36.61   0
  -2  -2   1 2157.23   23.96   0
  -2  -2   1 1991.81   27.58   0
   2   2  -1 1969.06   26.67   0
   0  -2  -1  684.17   18.84   0
   0  -2   1  520.42   23.12   0
   0  -2   1  599.67   17.14   0
   0   2  -1  575.81   15.55   0
   0   2   1  665.99   19.08   0
   2  -2   1 5265.37   47.73   0
   2   2   1 5776.75   38.46   0
  -2  -2  -1 6045.65   37.50   0
  -2   2  -1 4724.81   33.54   0
   2   2   1 4658.05   31.61   0
  -2  -2  -1 4489.91   32.31   0
   4   2   1  826.77   16.14   0
   4   2   1  984.35   16.25   0
  -4  -2  -1 1076.93   17.76   0
   4  -2   1  908.46   17.72   0
  -4  -2  -1  821.62   14.85   0
  -4   2  -1  947.16   17.90   0
  -6   2  -1 2560.30   21.85   0
  -6  -2  -1 2475.05   21.22   0
  -6   2  -1 3053.16   23.31   0
   6   2   1 3073.32   21.54   0
   6   2   1 2550.83   19.51   0
   6  -2   1 2628.14   21.69   0
  -6  -2  -1 3097.41   23.09   0
  -8  -2  -1    9.10    8.48   0
  -8  -2  -1   11.33    8.61   0
  -8   2  -1    8.50    7.91   0
   8   2   1    4.29    8.31   0
  -8   2  -1    9.52    8.03   0
   8   2   1    2.28    8.47   0
   8  -2   1    8.24    8.00   0
 -10   2  -1  475.23   11.94   0
  10   2   1  398.36   11.99   0
  10  -2   1  475.86   10.34   0
 -10  -2  -1  471.42   11.03   0
 -10  -2  -1  392.16   10.23   0
  10  -2   1  396.31    9.97   0
 -10   2  -1  439.25   11.45   0
  10   2   1  460.14   12.20   0
  12  -2   1   29.90    7.93   0
 -12   2  -1   28.54    9.62   0
 -12  -2  -1   30.91    8.73   0
 -12   2  -1   22.03    8.21   0
  12   2   1   28.84    8.56   0
  12   2   1   29.25    8.66   0
  12  -2   1   28.64    8.21   0
 -12  -2  -1   23.22    8.36   0
  14   2   1  506.33   12.09   0
 -14  -2  -1  713.38   11.50   0
 -14  -2  -1  560.81   10.77   0
 -14   2  -1  583.94   10.63   0
  14   2   1  684.33   11.19   0
  14  -2   1  556.57   10.50   0
 -14   2  -1  666.98   11.32   0
  14  -2   1  628.86   11.01   0
 -16  -2  -1  104.32    9.31   0
  16   2   1  106.76   11.22   0
  16  -2   1  119.37   10.92   0
  16  -2   1   99.35    9.13   0
 -16   2  -1  106.18   11.33   0
 -16  -2  -1  114.12    9.61   0
  16   2   1   92.37    9.16   0
 -16   2  -1   90.65    8.92   0
 -18   2  -1  972.08   12.37   0
  18  -2   1  951.53   12.25   0
 -18  -2  -1  994.54   12.41   0
  18   2   1  912.73   12.01   0
 -18  -2  -1 1082.79   13.24   0
  18   2   1 1119.71   14.43   0
 -18   2  -1 1170.69   13.45   0
  20  -2   1   17.89   11.94   0
  20   2   1   29.95    9.84   0
 -20   2  -1   30.34   11.72   0
  20   2   1   21.90   12.16   0
 -20  -2  -1   23.46   10.03   0
 -20  -2  -1   18.02   10.34   0
 -20   2  -1   27.51   10.14   0
 -22  -2  -1  328.33   14.50   0
  22   2   1  332.97   11.66   0
 -22  -2  -1  288.24   13.71   0
  22  -2   1  298.40   11.20   0
  22   2   1  272.57   13.28   0
 -22   2  -1  332.48   14.48   0
 -22   2  -1  305.77   11.28   0
 -24  -2  -1   40.25   11.51   0
 -24  -2  -1   43.60   12.24   0
  24  -2   1   51.07   11.60   0
 -24   2  -1   50.74   14.99   0
  24   2   1   38.01   11.45   0
  24   2   1   54.92   11.20   0
 -24   2  -1   51.46   11.40   0
 -25  -3   1  119.45   15.93   0
  25  -3  -1  101.62   12.05   0
  25   3  -1   96.11   11.97   0
 -25  -3   1  104.33   15.00   0
  25   3  -1  146.06   12.45   0
 -25   3   1  152.42   16.26   0
 -23   3   1   26.06   14.35   0
 -23  -3   1   33.51   13.95   0
 -23  -3   1   20.71   11.04   0
  23   3  -1   24.43   10.82   0
 -23   3   1   21.80   10.48   0
  23   3  -1   21.73   11.00   0
  23  -3  -1   24.39   10.54   0
 -21  -3   1  162.08   10.60   0
  21   3  -1  174.56   11.03   0
  21  -3  -1  151.97   10.40   0
 -21  -3   1  170.72   10.87   0
 -21   3   1  148.44   10.53   0
 -21   3   1  193.59   14.05   0
  21   3  -1  136.17   12.58   0
  19   3  -1   39.04    9.37   0
  19  -3  -1   40.53    9.19   0
 -19   3   1   56.41   12.24   0
 -19   3   1   43.10    9.36   0
  19   3  -1   39.99    9.41   0
 -19  -3   1   40.42    9.56   0
 -19  -3   1   41.51   12.14   0
 -17   3   1  895.06   13.38   0
  17  -3  -1  744.24   11.08   0
 -17   3   1  760.09   13.01   0
  17   3  -1  849.44   13.89   0
 -17  -3   1  833.71   12.40   0
 -17  -3   1  730.75   11.47   0
  17   3  -1  729.13   11.25   0
  15  -3  -1   69.15    8.55   0
 -15   3   1   71.52   10.44   0
  15   3  -1   61.57    8.97   0
  15   3  -1   82.01    8.99   0
 -15   3   1   72.93   11.14   0
 -15  -3   1   63.89    9.05   0
 -15  -3   1   74.97   11.04   0
  13  -3  -1 1803.46   15.63   0
 -13  -3   1 1892.40   16.93   0
  13   3  -1 1933.67   15.53   0
 -13  -3   1 1744.03   14.29   0
 -13   3   1 2138.21   19.17   0
 -13   3   1 1760.27   14.25   0
  13   3  -1 1772.09   14.21   0
 -11  -3   1   13.54   10.77   0
  11  -3  -1    2.77    8.05   0
  11   3  -1    9.00    8.38   0
 -11  -3   1   -1.06    9.99   0
 -11   3   1    1.15   10.22   0
 -11   3   1    6.41    9.87   0
  11   3  -1    9.35    8.75   0
   9   3  -1 1075.68   14.09   0
  -9  -3   1  966.26   12.41   0
  -9  -3   1 1039.53   13.94   0
   9   3  -1  892.43   12.46   0
   9  -3  -1 1041.88   12.73   0
  -9   3   1 1095.54   17.69   0
   7  -3  -1  179.51   11.04   0
   7   3  -1  221.77   12.33   0
  -7   3   1  218.36   11.59   0
  -7  -3   1  189.04    9.70   0
  -7  -3   1  198.35   10.41   0
   7   3  -1  167.10    9.70   0
   5   3  -1  398.23   12.06   0
   5   3  -1  376.99   11.39   0
  -5   3   1  352.08   14.91   0
  -5  -3   1  365.44   11.55   0
  -5  -3   1  415.54   11.90   0
  -3  -3   1 3028.14   26.91   0
   3  -3  -1 3338.42   32.31   0
   3   3  -1 3060.93   25.25   0
  -3  -3   1 3485.08   25.39   0
   3   3  -1 3397.70   25.47   0
  -3   3   1 3241.62   32.70   0
   1   3  -1 4617.43   30.00   0
   1  -3  -1 4991.42   37.44   0
  -1  -3   1 4574.55   29.34   0
  -1   3   1 4726.95   37.50   0
   1   3  -1 4171.52   34.81   0
  -1  -3   1 4126.56   35.13   0
  -1  -3  -1 2252.56   21.90   0
  -1   3  -1 2280.25   23.36   0
   1   3   1 2620.36   26.49   0
  -1  -3  -1 2657.65   24.95   0
   1  -3   1 2408.39   22.21   0
  -3  -3  -1 2603.85   23.56   0
   3   3   1 2497.14   22.57   0
   3   3   1 2123.08   19.55   0
   3  -3   1 2134.98   20.33   0
  -3   3  -1 2118.11   21.17   0
  -3  -3  -1 2011.10   19.78   0
   5  -3   1 1238.23   17.74   0
  -5   3  -1 1057.34   15.28   0
   5   3   1 1420.44   17.82   0
   5   3   1 1146.31   16.04   0
  -5  -3  -1 1145.74   15.00   0
  -5  -3  -1 1423.02   16.36   0
  -7  -3  -1   45.41    8.70   0
  -7   3  -1   44.14    8.57   0
  -7  -3  -1   34.59    8.59   0
   7   3   1   28.61    8.36   0
   7  -3   1   37.03   10.06   0
   7   3   1   38.29   10.80   0
  -7   3  -1   36.90    9.74   0
  -9   3  -1  981.38   12.92   0
  -9   3  -1 1139.16   13.49   0
   9  -3   1 1018.28   12.84   0
   9   3   1 1134.36   14.64   0
  -9  -3  -1 1159.55   13.39   0
   9   3   1  887.81   12.36   0
  -9  -3  -1  905.89   12.52   0
  11   3   1   44.28    8.66   0
  11  -3   1   45.74    8.10   0
  11   3   1   41.59    8.23   0
 -11  -3  -1   44.92    8.78   0
 -11  -3  -1   37.28    8.41   0
 -11   3  -1   48.35    8.02   0
 -11   3  -1   41.47    9.56   0
 -13  -3  -1  307.68    9.81   0
  13   3   1  311.47    9.62   0
  13  -3   1  343.42    9.54   0
 -13   3  -1  348.47    9.52   0
 -13   3  -1  378.47   11.68   0
 -13  -3  -1  367.84   10.28   0
  13   3   1  362.40   10.09   0
 -15  -3  -1   33.02    9.13   0
 -15  -3  -1   27.32    9.01   0
 -15   3  -1   25.27    8.80   0
  15  -3   1   30.48    8.59   0
  15   3   1   28.60    8.90   0
  15   3   1   29.48    8.88   0
 -15   3  -1   17.84    8.66   0
  17  -3   1  143.58    9.43   0
  17   3   1  145.78    9.70   0
 -17   3  -1  147.84    9.56   0
 -17  -3  -1  141.73    9.56   0
  17   3   1  151.10    9.65   0
 -17   3  -1  165.67   11.55   0
 -17  -3  -1  147.49   10.03   0
  19   3   1   -1.01    9.86   0
 -19  -3  -1   -6.67   11.83   0
  19   3   1    3.39    9.33   0
 -19   3  -1    3.53    9.43   0
  19  -3   1   17.99    9.44   0
 -19   3  -1   -4.10    9.88   0
 -19  -3  -1   -2.61   10.04   0
  21   3   1  189.88   13.16   0
 -21  -3  -1  191.48   13.66   0
 -21  -3  -1  163.58   10.56   0
  21   3   1  155.88   10.42   0
  21  -3   1  170.67   10.48   0
 -21   3  -1  182.75   13.62   0
 -21   3  -1  180.17   12.75   0
  23   3   1   -4.82   10.77   0
 -23   3  -1   24.50   14.45   0
 -23  -3  -1    4.21   11.55   0
  23  -3   1   10.63   10.81   0
 -23  -3  -1    5.97   10.84   0
  23   3   1    0.01   11.04   0
 -23   3  -1    6.15   10.55   0
  24   4  -1   17.17   14.00   0
  24   4  -1   19.84   11.37   0
  24  -4  -1   34.30   13.70   0
 -24  -4   1   22.92   12.19   0
 -24   4   1   27.09   15.25   0
 -24  -4   1   20.09   11.39   0
 -22  -4   1   -2.90   10.63   0
  22   4  -1    9.56   12.80   0
 -22  -4   1   -2.23   13.80   0
 -22   4   1    8.65   13.70   0
  22   4  -1    1.25   12.81   0
  22  -4  -1    9.18   10.49   0
 -20   4   1   19.46   12.75   0
  20   4  -1    4.37    9.76   0
  20  -4  -1    3.78    9.40   0
 -20  -4   1   12.66    9.93   0
 -20  -4   1   10.80   12.76   0
  20   4  -1   11.82   10.04   0
  18   4  -1    6.77    9.28   0
  18  -4  -1    3.06    9.09   0
 -18   4   1    5.91   11.75   0
 -18  -4   1   12.27   12.09   0
  18   4  -1    1.40    9.46   0
 -18  -4   1    3.18    9.48   0
  16  -4  -1   11.19    8.59   0
 -16   4   1   17.02   10.95   0
  16   4  -1   12.16    8.66   0
 -16  -4   1   11.82    9.18   0
  16   4  -1   16.49    8.82   0
 -16  -4   1   17.17   11.03   0
  14   4  -1   96.77    9.10   0
  14  -4  -1   82.59    8.63   0
 -14   4   1   86.39   10.92   0
 -14  -4   1   89.91   11.25   0
  14   4  -1   76.37    8.89   0
 -14  -4   1   73.83    9.07   0
  12   4  -1  324.88   11.98   0
 -12   4   1  329.03   11.95   0
  12  -4  -1  295.11   11.09   0
  12   4  -1  265.91   11.20   0
 -12  -4   1  315.58   12.05   0
 -12  -4   1  285.83    9.58   0
  10   4  -1  573.49   11.80   0
 -10  -4   1  484.89   10.54   0
  10  -4  -1  508.98   10.60   0
 -10  -4   1  536.87   13.28   0
 -10   4   1  590.09   13.70   0
  10   4  -1  478.06   10.34   0
  -8  -4   1  153.06    9.79   0
   8   4  -1  158.48    9.81   0
   8   4  -1  130.11    8.99   0
  -8   4   1  166.81   12.32   0
  -8   4   1  132.48   10.70   0
  -8  -4   1  121.83   10.98   0
   8  -4  -1  137.93   10.79   0
   6   4  -1   20.57    9.04   0
  -6  -4   1   24.66    8.78   0
  -6   4   1   18.65    9.72   0
  -6  -4   1   21.37    8.90   0
   6   4  -1   23.03   10.53   0
  -4  -4   1    8.38   10.95   0
  -4   4   1    6.96   11.93   0
  -4  -4   1    4.94    8.97   0
   4   4  -1    0.92   10.36   0
   4  -4  -1   -0.42    9.93   0
   4   4  -1    9.87    9.12   0
   2   4  -1  425.68   13.81   0
   2  -4  -1  417.40   13.62   0
  -2  -4   1  424.73   11.98   0
  -2  -4   1  360.95   11.83   0
   2   4  -1  376.27   13.03   0
  -2   4   1  415.36   12.75   0
   0  -4   1    1.29   10.62   0
   0  -4   1    4.41    9.17   0
   0   4  -1    2.13    9.32   0
   0  -4  -1    4.20    9.13   0
   0   4   1    6.87    9.51   0
   2   4   1    3.65    9.57   0
  -2  -4  -1    4.14   11.42   0
  -2   4  -1    0.12    8.81   0
  -2  -4  -1    3.24    8.97   0
   2  -4   1    6.63   10.68   0
   4   4   1   25.65    8.75   0
  -4   4  -1   27.53    8.65   0
  -4  -4  -1   38.95   11.18   0
  -4  -4  -1   29.65   10.58   0
   4   4   1   31.41    9.41   0
  -6   4  -1  280.75    9.96   0
   6   4   1  276.85    9.80   0
  -6  -4  -1  335.41   10.48   0
   6   4   1  322.62   10.67   0
  -6  -4  -1  263.54    9.88   0
   6  -4   1  328.27   11.83   0
   8   4   1  114.35    9.19   0
  -8   4  -1  121.89   10.10   0
  -8  -4  -1  121.81    9.22   0
   8   4   1  101.36    8.76   0
  -8   4  -1  101.06    8.28   0
  -8  -4  -1   96.42    8.87   0
   8  -4   1  103.04    8.33   0
 -10  -4  -1   97.12    9.02   0
  10   4   1  110.71    8.97   0
  10   4   1   95.24    8.95   0
 -10  -4  -1   99.73    9.13   0
  10  -4   1  104.23    8.27   0
 -10   4  -1  120.91   10.11   0
  12   4   1   13.54    8.40   0
 -12   4  -1   15.26    9.80   0
  12  -4   1    6.17    9.90   0
  12   4   1   10.48    8.67   0
 -12  -4  -1   12.84   10.74   0
 -12   4  -1   11.31    9.63   0
 -12  -4  -1   19.37   10.36   0
 -14  -4  -1  232.43    9.83   0
  14   4   1  229.34    9.64   0
 -14  -4  -1  189.38    9.58   0
  14  -4   1  201.93    9.31   0
  14   4   1  190.64   11.21   0
 -14   4  -1  213.26   11.10   0
 -14   4  -1  235.65   11.43   0
  16  -4   1   71.27    9.05   0
 -16  -4  -1   61.06    9.11   0
 -16  -4  -1   85.75   11.54   0
 -16   4  -1   70.36    8.97   0
 -16   4  -1   98.34   11.06   0
  16   4   1  100.25    9.20   0
  16   4   1   67.90    9.04   0
 -18  -4  -1  317.82   10.48   0
  18   4   1  385.16   10.85   0
  18   4   1  299.22   10.29   0
  18  -4   1  325.97   12.41   0
 -18   4  -1  348.97   12.25   0
 -18   4  -1  394.13   12.77   0
 -18  -4  -1  371.26   11.15   0
  20   4   1   15.30    9.94   0
 -20   4  -1   12.41   12.00   0
 -20   4  -1   14.67   12.78   0
 -20  -4  -1   29.83   10.45   0
  20  -4   1   23.43    9.95   0
 -20  -4  -1   26.00   12.24   0
  20   4   1   29.90   12.37   0
  22   4   1   34.78   10.74   0
 -22  -4  -1   23.97   10.76   0
  22   4   1   21.90   12.91   0
 -22   4  -1   36.82   12.94   0
  22  -4   1   43.33   10.74   0
 -22  -4  -1   32.09   11.25   0
 -22   4  -1   37.24   13.87   0
 -24   4  -1   12.98   12.28   0
  24  -4   1    3.12   11.65   0
  24   4   1    1.68   13.99   0
 -24  -4  -1    5.94   15.01   0
 -24  -4  -1   10.25   11.46   0
  24   4   1   17.25   11.48   0
  23   5  -1   10.33   13.60   0
  23   5  -1  -10.21   13.55   0
  23  -5  -1   11.83   13.50   0
 -23  -5   1    6.77   11.28   0
 -23  -5   1    7.60   11.50   0
 -23   5   1   -1.24   14.93   0
  21   5  -1   12.54   10.45   0
  21   5  -1   10.03   12.65   0
 -21  -5   1   13.58   10.98   0
 -21  -5   1    9.49   10.58   0
 -21   5   1   14.89   13.55   0
  21  -5  -1   25.15   10.09   0
 -19  -5   1    2.32   10.20   0
 -19   5   1   -2.31   12.60   0
  19   5  -1   11.78    9.76   0
 -19  -5   1    8.49   10.16   0
  19  -5  -1   12.69   11.45   0
  19   5  -1    4.65   12.10   0
 -17   5   1    9.04   11.52   0
  17   5  -1   -1.57   11.07   0
  17  -5  -1    2.79    8.57   0
  17   5  -1    7.12    9.18   0
 -17  -5   1   -5.39    9.44   0
 -17  -5   1    5.68    9.35   0
 -15  -5   1    6.69    9.11   0
  15   5  -1   11.09   10.93   0
  15  -5  -1   11.88    8.49   0
 -15  -5   1    4.76    9.20   0
  15   5  -1   12.75    8.88   0
 -15   5   1   14.84   10.94   0
 -13  -5   1  241.90    9.89   0
 -13   5   1  272.12   12.23   0
 -13   5   1  204.03   11.44   0
  13   5  -1  221.14   11.11   0
 -13  -5   1  213.55    9.54   0
  13  -5  -1  235.12   11.07   0
  13   5  -1  261.00   10.04   0
 -11  -5   1   23.66    8.43   0
  11   5  -1   22.39    8.40   0
  11  -5  -1   22.53    8.24   0
  11   5  -1   28.04    9.10   0
 -11   5   1   18.74    9.99   0
 -11  -5   1   31.59   10.97   0
 -11   5   1   21.22   10.21   0
   9   5  -1  710.61   13.57   0
  -9   5   1  611.23   13.66   0
  -9   5   1  810.15   14.93   0
   9  -5  -1  704.56   11.27   0
  -9  -5   1  751.92   12.15   0
  -9  -5   1  619.58   11.40   0
   9   5  -1  625.53   11.30   0
   7   5  -1  144.93    9.49   0
  -7  -5   1  123.84    9.28   0
  -7   5   1  119.37   10.84   0
  -7  -5   1  135.08   11.16   0
   7   5  -1  111.66   10.51   0
   5   5  -1   33.53    8.85   0
  -5   5   1   30.99    9.98   0
   5  -5  -1   27.03    9.72   0
  -5  -5   1   30.81   10.50   0
  -5  -5   1   32.38   10.59   0
   5   5  -1   33.03    8.23   0
   3   5  -1  907.72   13.95   0
  -3   5   1 1038.94   16.65   0
  -3  -5   1  935.27   15.50   0
   3  -5  -1  982.57   16.03   0
  -3  -5   1 1010.39   13.97   0
   3   5  -1 1068.40   14.19   0
  -1  -5   1  122.09    9.37   0
  -1  -5   1  102.48   11.21   0
   1  -5  -1  120.04    9.77   0
   1   5  -1  116.37    9.52   0
  -1   5   1  125.78   12.00   0
  -1   5  -1 1253.39   15.40   0
  -1  -5  -1 1443.52   16.50   0
   1  -5   1 1336.43   15.16   0
  -1  -5  -1 1128.12   14.86   0
   1   5   1 1357.79   16.92   0
  -3  -5  -1  761.37   13.18   0
  -3  -5  -1  616.25   12.09   0
   3   5   1  785.23   13.48   0
   3  -5   1  719.56   12.35   0
  -3   5  -1  669.74   12.30   0
   5   5   1  532.75   11.17   0
  -5   5  -1  523.53   11.22   0
  -5  -5  -1  615.46   13.65   0
  -5  -5  -1  506.31   11.07   0
   5   5   1  633.49   12.18   0
   7  -5   1 1232.44   15.87   0
  -7  -5  -1 1145.08   13.41   0
   7   5   1 1120.26   14.60   0
  -7  -5  -1 1333.24   15.90   0
   7   5   1 1423.85   14.81   0
  -7   5  -1 1193.60   14.66   0
   9   5   1   82.93   10.99   0
  -9  -5  -1   79.00    9.21   0
  -9  -5  -1   72.03    8.91   0
  -9   5  -1   92.47   10.13   0
  -9   5  -1   67.46    8.10   0
   9   5   1   75.76    8.50   0
   9  -5   1   76.65    8.41   0
 -11  -5  -1  157.83    9.44   0
  11   5   1  163.75    9.50   0
 -11   5  -1  127.15   10.30   0
 -11   5  -1  172.66   10.70   0
  11   5   1  153.30   10.92   0
 -11  -5  -1  145.83    9.20   0
  11  -5   1  159.56    8.84   0
  13  -5   1   17.32    8.25   0
 -13   5  -1   11.12   10.20   0
 -13  -5  -1   13.34    8.77   0
 -13  -5  -1   15.42    8.99   0
  13   5   1   14.20    8.54   0
  13   5   1   13.04   10.56   0
  15   5   1   29.43    8.97   0
  15  -5   1   40.98   10.93   0
  15   5   1   44.95    9.35   0
 -15  -5  -1   26.91    9.08   0
 -15  -5  -1   45.26    9.46   0
 -15   5  -1   35.05   11.01   0
 -17  -5  -1   18.58    9.65   0
  17   5   1   13.06    9.44   0
 -17  -5  -1   10.07    9.39   0
 -17   5  -1   14.72    9.22   0
  17   5   1   17.08    9.32   0
  17  -5   1    7.27   11.23   0
  19  -5   1   48.81   12.02   0
 -19   5  -1   49.08   12.26   0
 -19  -5  -1   43.91    9.89   0
  19   5   1   32.67    9.87   0
 -19  -5  -1   42.52   10.07   0
  19   5   1   58.83   12.14   0
 -21  -5  -1   51.89   10.87   0
  21   5   1   35.66   10.40   0
 -21   5  -1   51.67   10.91   0
  21   5   1   42.99   10.40   0
  21  -5   1   43.09   10.62   0
 -21  -5  -1   41.40   10.65   0
  23   5   1    9.93   11.13   0
 -23  -5  -1   -9.84   11.38   0
 -23   5  -1    2.87   11.84   0
 -23  -5  -1    5.18   14.33   0
  23  -5   1   -6.77   13.82   0
  23   5   1    4.51   10.96   0
 -22   6   1  170.80   14.37   0
 -22  -6   1  176.93   11.57   0
 -22  -6   1  222.57   12.14   0
 -22   6   1  250.65   15.32   0
  22  -6  -1  194.99   13.90   0
  22   6  -1  200.55   11.42   0
  22   6  -1  229.96   11.73   0
 -20  -6   1    3.69   10.45   0
  20   6  -1   -2.31   12.73   0
  20   6  -1   11.33   12.41   0
 -20   6   1   12.09   13.26   0
 -20  -6   1    9.59   10.49   0
  20  -6  -1    6.00   10.07   0
 -20   6   1   -0.37   12.42   0
  18   6  -1  185.43   10.04   0
 -18   6   1  238.46   13.22   0
 -18   6   1  189.98   12.70   0
 -18  -6   1  199.96   10.48   0
  18  -6  -1  211.80   10.08   0
 -18  -6   1  240.55   10.77   0
  18   6  -1  225.46   10.51   0
 -16   6   1    3.50   12.38   0
 -16  -6   1    4.34    9.30   0
  16   6  -1   11.98    9.19   0
  16   6  -1    1.52    9.22   0
 -16  -6   1   10.83    9.48   0
  16  -6  -1   -1.16    8.81   0
 -16   6   1    8.13   11.46   0
 -14  -6   1  490.42   10.99   0
 -14   6   1  412.20   12.69   0
  14   6  -1  510.56   11.00   0
  14  -6  -1  486.34   12.20   0
 -14   6   1  522.07   13.61   0
  14   6  -1  426.00   10.20   0
 -14  -6   1  426.44   10.51   0
 -12   6   1    7.62   10.37   0
  12  -6  -1   11.45    8.27   0
  12   6  -1   10.00    8.90   0
 -12  -6   1   13.50    8.90   0
 -12   6   1   12.61   10.22   0
 -12  -6   1    6.27    8.67   0
  12   6  -1    8.29    8.45   0
 -10  -6   1 1901.22   15.63   0
  10   6  -1 1664.55   14.41   0
  10   6  -1 2070.73   17.31   0
 -10   6   1 2215.53   20.22   0
 -10  -6   1 1705.14   15.95   0
  10  -6  -1 1866.96   16.51   0
 -10   6   1 1784.34   18.32   0
  -8  -6   1   11.18   10.66   0
   8   6  -1   22.27   10.42   0
   8   6  -1   23.08    8.90   0
  -8   6   1   18.13   10.00   0
  -8  -6   1   20.11    8.57   0
   8  -6  -1   21.19    8.17   0
   6  -6  -1 3763.57   25.10   0
  -6  -6   1 3815.62   21.22   0
   6   6  -1 4204.69   21.78   0
  -6  -6   1 3675.98   21.03   0
   6   6  -1 3584.38   20.54   0
  -6   6   1 3470.91   25.45   0
  -4  -6   1    4.97    8.37   0
   4   6  -1    7.95    7.94   0
  -4   6   1    1.71    8.28   0
   4   6  -1    2.90    8.52   0
  -4  -6   1    4.15    8.04   0
   4  -6  -1    1.95    9.77   0
   2   6  -1 1724.01   16.14   0
  -2  -6   1 1658.45   17.00   0
  -2  -6   1 1485.01   16.51   0
  -2   6   1 1724.25   17.57   0
   2  -6  -1 1771.68   18.20   0
   0   6  -1  711.70   12.43   0
   0  -6  -1  736.22   12.62   0
   0  -6   1  644.78   11.94   0
   0   6   1  740.51   13.01   0
   0  -6   1  624.33   12.67   0
  -2  -6  -1  859.34   13.06   0
  -2  -6  -1  754.67   12.27   0
   2  -6   1  813.22   12.27   0
  -2   6  -1  817.28   12.66   0
   2   6   1  882.43   13.42   0
   4   6   1  250.44   12.00   0
   4  -6   1  211.77   10.78   0
  -4  -6  -1  205.92    9.52   0
  -4  -6  -1  238.42   10.01   0
  -4   6  -1  221.66   10.93   0
  -6   6  -1 1988.13   16.44   0
   6  -6   1 2219.46   19.39   0
  -6  -6  -1 2014.31   15.72   0
   6   6   1 1911.35   15.58   0
   6   6   1 2360.53   17.47   0
  -6  -6  -1 2316.94   17.31   0
   8   6   1   84.64    8.68   0
  -8   6  -1   93.64    8.35   0
   8   6   1  112.58    9.50   0
  -8  -6  -1  125.93    9.38   0
  -8  -6  -1   95.52    8.87   0
   8  -6   1  101.50   10.41   0
 -10   6  -1 1171.91   14.40   0
 -10   6  -1 1541.39   14.67   0
 -10  -6  -1 1155.57   12.88   0
 -10  -6  -1 1419.29   13.75   0
  10   6   1 1156.94   12.66   0
  10   6   1 1441.08   13.88   0
  10  -6   1 1346.96   15.26   0
  12   6   1   46.59    9.17   0
 -12   6  -1   45.63    8.51   0
 -12  -6  -1   44.82    9.12   0
  12  -6   1   34.92    8.66   0
 -12  -6  -1   38.77    9.18   0
 -12   6  -1   33.45   10.16   0
  12   6   1   48.77    9.22   0
  14  -6   1  392.66   10.47   0
 -14   6  -1  350.45   11.85   0
  14   6   1  482.78   10.89   0
 -14   6  -1  475.78   10.80   0
  14   6   1  383.71   10.14   0
 -14  -6  -1  439.86   10.98   0
 -14  -6  -1  397.56   10.33   0
 -16  -6  -1    6.41    9.45   0
 -16  -6  -1    2.33    9.50   0
  16   6   1    7.56    9.59   0
 -16   6  -1    5.53    9.16   0
 -16   6  -1    5.05    9.15   0
  16  -6   1   11.84   11.15   0
  16   6   1    3.82    9.32   0
 -18   6  -1  254.10   12.77   0
 -18  -6  -1  247.40   10.85   0
  18  -6   1  206.45   10.33   0
 -18  -6  -1  238.45   10.81   0
  18   6   1  202.43   10.64   0
  18   6   1  252.38   10.49   0
 -18   6  -1  201.95   10.40   0
  20   6   1    5.13   10.26   0
 -20   6  -1   15.38   12.89   0
  20  -6   1    3.90   10.22   0
 -20  -6  -1   14.13   10.59   0
 -20   6  -1    8.79   12.43   0
  20   6   1   16.74   10.41   0
 -20  -6  -1   10.42   10.42   0
 -22   6  -1  189.13   14.82   0
 -22  -6  -1  148.87   11.65   0
 -22   6  -1  151.21   13.83   0
  22   6   1  145.92   11.51   0
  22  -6   1  151.65   11.67   0
 -22  -6  -1  174.30   11.81   0
  22   6   1  175.05   11.96   0
 -23   7   1   26.96   14.39   0
 -23   7   1   40.25   15.39   0
  23  -7  -1   33.72   11.46   0
  23   7  -1   31.24   11.65   0
 -23  -7   1   23.16   11.75   0
 -23  -7   1   22.00   12.28   0
  23   7  -1   39.79   11.87   0
 -21   7   1   23.53   13.32   0
  21  -7  -1   37.37   13.08   0
 -21   7   1   46.65   14.26   0
  21   7  -1   40.88   10.67   0
 -21  -7   1   37.40   13.89   0
 -21  -7   1   30.40   11.04   0
  21   7  -1   27.47   13.68   0
 -19   7   1  129.85   13.13   0
 -19   7   1  113.63   12.72   0
 -19  -7   1  102.13   12.60   0
  19   7  -1   98.10   10.27   0
 -19  -7   1  136.63   11.07   0
  19  -7  -1  122.25   10.52   0
  19   7  -1  141.74   10.53   0
  17   7  -1   57.82    9.54   0
 -17  -7   1   64.93   10.15   0
  17  -7  -1   61.87    9.70   0
 -17   7   1   59.63   11.58   0
  17   7  -1   71.54   12.12   0
 -17  -7   1   59.46    9.71   0
 -17   7   1   77.37   12.01   0
  15  -7  -1  274.95   12.18   0
 -15  -7   1  236.63   10.07   0
  15   7  -1  290.77   12.40   0
 -15   7   1  287.77   12.58   0
 -15  -7   1  271.43   10.31   0
 -15   7   1  232.34   12.09   0
  15   7  -1  231.69   10.17   0
 -13   7   1    2.21   10.68   0
  13   7  -1    3.66    8.91   0
  13  -7  -1    7.21   10.50   0
  13   7  -1    1.77    9.74   0
 -13   7   1    7.39   10.79   0
 -13  -7   1   -0.24   11.04   0
 -13  -7   1    6.05    8.94   0
 -11  -7   1  121.48   10.88   0
 -11   7   1  114.37   11.07   0
  11   7  -1  131.60   10.82   0
 -11  -7   1  140.34    9.69   0
  11   7  -1  136.19    9.82   0
 -11   7   1  144.79   11.23   0
  11  -7  -1  139.81   10.88   0
   9   7  -1  441.11   10.71   0
  -9  -7   1  440.56   10.55   0
  -9  -7   1  403.71   10.38   0
   9   7  -1  384.97   10.06   0
   9  -7  -1  418.97   11.44   0
  -9   7   1  409.98   12.47   0
  -7  -7   1   13.56   10.24   0
   7   7  -1   10.37    8.82   0
   7   7  -1    7.10    8.32   0
  -7   7   1   11.58   10.13   0
  -7  -7   1   12.96    8.70   0
  -5  -7   1 1095.07   13.16   0
  -5   7   1 1137.43   15.99   0
   5   7  -1  973.61   12.98   0
   5   7  -1 1161.87   13.48   0
   5  -7  -1 1144.25   15.60   0
  -5  -7   1  964.72   14.14   0
  -3  -7   1  311.55   10.03   0
  -3  -7   1  339.00   11.96   0
  -3   7   1  346.93   12.16   0
   3  -7  -1  346.74   10.14   0
   3   7  -1  359.21   10.48   0
  -1   7   1  862.32   14.43   0
  -1  -7   1  754.63   12.14   0
   1  -7  -1  807.43   13.92   0
  -1  -7   1  712.75   12.39   0
   1   7  -1  779.57   12.33   0
   1  -7   1 2099.23   16.36   0
  -1   7  -1 2119.93   17.98   0
  -1  -7  -1 2154.07   18.58   0
  -1  -7  -1 1918.68   16.06   0
   1   7   1 2296.81   19.12   0
  -3   7  -1  344.78    9.98   0
   3   7   1  344.42   10.58   0
  -3  -7  -1  308.57   10.05   0
  -3  -7  -1  351.59   12.13   0
   3  -7   1  314.86    9.74   0
   5   7   1 1775.17   15.66   0
  -5  -7  -1 1716.84   15.48   0
  -5  -7  -1 1421.41   15.45   0
   5  -7   1 1514.69   14.63   0
  -5   7  -1 1573.71   14.88   0
   7  -7   1  261.10   11.41   0
   7   7   1  273.11   10.22   0
   7   7   1  248.16    9.50   0
  -7   7  -1  243.85    9.09   0
  -7  -7  -1  278.76   11.82   0
  -7  -7  -1  255.57    9.61   0
   9   7   1 1064.53   12.18   0
   9   7   1 1256.36   13.49   0
  -9  -7  -1 1149.98   13.10   0
  -9  -7  -1 1015.07   12.29   0
   9  -7   1 1070.26   13.26   0
  -9   7  -1  954.10   12.46   0
  11   7   1  202.47    9.95   0
 -11   7  -1  163.89   10.88   0
 -11  -7  -1  168.36    9.53   0
 -11   7  -1  205.20   11.12   0
  11  -7   1  182.81    9.32   0
 -11  -7  -1  211.02    9.93   0
  11   7   1  155.68   11.37   0
  13  -7   1  508.95   12.57   0
  13   7   1  496.57   10.71   0
  13   7   1  580.68   13.21   0
 -13  -7  -1  482.72   10.95   0
 -13   7  -1  443.63   10.62   0
 -13   7  -1  602.02   11.22   0
 -13  -7  -1  563.57   13.13   0
 -15  -7  -1   74.02   10.13   0
  15   7   1   59.57    9.74   0
 -15   7  -1   56.74   11.20   0
  15  -7   1   55.99   11.50   0
 -15   7  -1   74.57   11.47   0
  15   7   1   76.24   10.03   0
 -15  -7  -1   48.96    9.67   0
 -17  -7  -1  221.74   10.55   0
 -17   7  -1  280.44   12.70   0
  17  -7   1  238.76   12.67   0
  17   7   1  241.73   10.58   0
 -17   7  -1  215.17   12.43   0
 -17  -7  -1  275.15   10.92   0
  17   7   1  279.63   10.84   0
  19  -7   1   14.40   10.59   0
 -19  -7  -1   17.01   10.76   0
  19   7   1    6.23   10.33   0
 -19   7  -1   19.10   12.47   0
  19   7   1   25.95   12.60   0
 -19  -7  -1   21.09   12.77   0
 -19   7  -1   15.50   12.26   0
 -21  -7  -1  246.23   11.92   0
 -21   7  -1  308.55   14.65   0
 -21  -7  -1  287.07   12.29   0
 -21   7  -1  213.55   14.11   0
  21   7   1  278.26   11.74   0
  21   7   1  225.75   14.14   0
  21  -7   1  253.24   11.75   0
  23   7   1   23.70   11.60   0
 -23   7  -1   11.13   14.50   0
 -23  -7  -1   20.11   12.04   0
  22   8  -1   17.96   11.47   0
  22  -8  -1   19.32   11.38   0
  22   8  -1   19.85   11.56   0
 -22   8   1    6.61   14.08   0
 -22   8   1   18.62   14.94   0
 -22  -8   1   30.51   11.86   0
 -22  -8   1   15.46   12.10   0
  20   8  -1   15.99   10.72   0
 -20   8   1   11.21   13.58   0
 -20  -8   1   30.15   11.27   0
 -20  -8   1    4.62   13.28   0
 -20   8   1   19.13   13.31   0
  20  -8  -1   10.49   13.04   0
  20   8  -1   13.22   11.11   0
 -18   8   1  211.16   13.24   0
  18  -8  -1  234.89   13.02   0
 -18  -8   1  261.50   11.33   0
  18   8  -1  294.63   11.36   0
 -18  -8   1  222.65   10.64   0
 -18   8   1  276.86   13.85   0
  18   8  -1  231.93   10.74   0
 -16   8   1    7.24   11.22   0
  16  -8  -1    1.18    9.57   0
  16   8  -1   -2.08    9.87   0
 -16   8   1   -1.06   12.12   0
  16   8  -1    4.37    9.38   0
 -16  -8   1    0.21    9.60   0
 -16  -8   1   11.92   12.12   0
 -14   8   1  535.63   13.86   0
  14   8  -1  502.82   11.71   0
 -14   8   1  415.96   12.99   0
  14   8  -1  423.96   10.69   0
 -14  -8   1  400.79   10.59   0
 -14  -8   1  478.37   13.45   0
  14  -8  -1  470.24   12.78   0
 -12   8   1   -3.00   10.92   0
 -12  -8   1    6.56    9.61   0
 -12   8   1   -4.90   10.73   0
  12   8  -1   -1.16    9.64   0
  12  -8  -1   11.72    8.92   0
  12   8  -1    3.20    8.79   0
 -12  -8   1    0.87    8.72   0
  10   8  -1  328.60    9.85   0
  10   8  -1  375.95   10.94   0
 -10   8   1  338.09   12.34   0
 -10  -8   1  317.44    9.99   0
 -10  -8   1  371.22   12.77   0
  10  -8  -1  355.50    9.84   0
  -8  -8   1   10.60    9.15   0
   8   8  -1   14.66    8.95   0
   8   8  -1   10.24   10.24   0
  -8  -8   1   10.90    8.80   0
  -8   8   1   15.66   10.40   0
   6  -8  -1  337.88   11.70   0
  -6  -8   1  315.94   10.06   0
  -6   8   1  350.74   12.32   0
  -6  -8   1  354.48   10.35   0
   6   8  -1  386.61   12.27   0
   6   8  -1  305.09   11.32   0
   4   8  -1   61.84    9.06   0
  -4   8   1   60.66   10.43   0
  -4  -8   1   57.32   10.92   0
  -4  -8   1   58.24    8.57   0
   4  -8  -1   60.62   10.11   0
   2   8  -1  659.41   11.62   0
  -2  -8   1  687.27   11.51   0
   2  -8  -1  659.03   11.49   0
  -2  -8   1  596.55   11.45   0
  -2   8   1  668.36   11.88   0
   0  -8  -1    6.89    8.31   0
   0   8   1    8.64    8.24   0
   0  -8   1    7.19    8.48   0
   0  -8   1   11.17    8.30   0
   0   8  -1   13.39    8.36   0
   2  -8   1  518.12   10.99   0
  -2  -8  -1  564.51   11.29   0
  -2  -8  -1  470.45   12.08   0
  -2   8  -1  558.01   11.10   0
   2   8   1  569.34   11.58   0
  -4   8  -1   69.92    8.57   0
  -4  -8  -1   88.03   10.97   0
  -4  -8  -1   61.78    8.74   0
   4  -8   1   73.25    8.49   0
   4   8   1   86.36    9.29   0
  -6   8  -1  194.05    9.06   0
   6   8   1  223.78    9.94   0
  -6  -8  -1  188.62    9.70   0
   6  -8   1  183.42    8.88   0
  -6  -8  -1  182.67    9.26   0
  -8  -8  -1   13.41    9.03   0
  -8  -8  -1   19.60   10.38   0
   8   8   1   16.22    8.70   0
  -8   8  -1   18.67    8.27   0
   8  -8   1   16.90   10.27   0
   8   8   1   20.81    9.12   0
  10   8   1   83.80    9.76   0
 -10  -8  -1   83.26    9.54   0
  10   8   1   73.01    8.92   0
  10  -8   1   81.58   10.78   0
 -10   8  -1   71.96    8.65   0
 -10  -8  -1   71.63    9.17   0
  12  -8   1    2.38   10.80   0
 -12  -8  -1    1.57    9.38   0
 -12   8  -1    3.55   10.77   0
  12   8   1    8.42    8.92   0
 -12   8  -1    5.94    8.52   0
  12   8   1    5.10    9.39   0
 -12  -8  -1    2.71    9.28   0
  14  -8   1    7.52    9.04   0
  14   8   1   -3.16    9.72   0
 -14   8  -1   -0.73   11.16   0
 -14  -8  -1    2.90    9.98   0
 -14   8  -1    2.29    8.98   0
 -14  -8  -1    8.79    9.71   0
  14   8   1   11.14    9.76   0
 -16  -8  -1   -7.67   12.54   0
  16  -8   1    2.33   11.73   0
  16   8   1    2.55    9.86   0
 -16  -8  -1    9.33    9.96   0
 -16   8  -1    7.93    9.44   0
 -16   8  -1   10.28   11.60   0
  16   8   1    2.24   10.30   0
  18   8   1    7.75   10.29   0
 -18  -8  -1   -5.17   10.34   0
  18  -8   1   12.80   12.46   0
  18   8   1    6.07   10.59   0
 -18   8  -1    0.75   10.43   0
 -18  -8  -1    1.18   13.03   0
 -18   8  -1    1.24   10.04   0
 -20  -8  -1   23.33   11.00   0
 -20   8  -1   14.08   13.19   0
  20   8   1   25.04   10.91   0
  20  -8   1   19.71   10.95   0
  20   8   1   14.18   13.50   0
 -20  -8  -1   12.73   11.53   0
 -20   8  -1   22.74   13.66   0
 -22   8  -1    2.88   14.81   0
  22   8   1    6.98   11.75   0
  22   8   1   -0.30   11.75   0
 -22   8  -1    4.17   11.75   0
 -22  -8  -1    2.46   12.15   0
 -22  -8  -1  -14.77   12.00   0
  22  -8   1    8.25   11.91   0
 -21   9   1   18.55   14.67   0
  21   9  -1   32.94   11.60   0
 -21  -9   1   27.89   11.98   0
  21   9  -1   17.58   11.26   0
 -21  -9   1   18.38   12.07   0
 -21   9   1   15.13   16.40   0
  21  -9  -1   25.14   11.80   0
  19  -9  -1   21.01   13.28   0
 -19   9   1   20.81   15.67   0
 -19  -9   1   29.25   11.11   0
  19   9  -1   21.18   10.95   0
  19   9  -1   18.83   13.16   0
 -19   9   1   20.02   13.25   0
 -19  -9   1   15.65   11.32   0
  17   9  -1   14.46   10.37   0
  17  -9  -1   15.16   10.06   0
 -17  -9   1    7.04   10.18   0
 -17  -9   1   -2.93   10.55   0
  17   9  -1   12.27   10.03   0
 -17   9   1    1.85   12.28   0
 -17   9   1    7.27   12.46   0
 -15  -9   1   36.74   10.38   0
 -15  -9   1   46.45    9.78   0
 -15   9   1   39.97   11.89   0
  15   9  -1   46.36   11.65   0
  15  -9  -1   46.80   12.03   0
  15   9  -1   50.94   10.35   0
 -15   9   1   51.04   11.94   0
 -13   9   1   57.69   11.65   0
 -13   9   1   46.64   11.57   0
 -13  -9   1   56.19   10.28   0
 -13  -9   1   58.70    9.54   0
  13   9  -1   64.31   10.33   0
  13  -9  -1   51.18    9.45   0
  13   9  -1   32.29    9.61   0
  11   9  -1   44.99    9.59   0
 -11  -9   1   50.03    9.72   0
 -11  -9   1   31.23    9.36   0
 -11   9   1   35.50   11.11   0
  11   9  -1   32.98    9.10   0
  11  -9  -1   40.13    9.12   0
  -9  -9   1   69.82   11.28   0
  -9   9   1   79.23   11.32   0
   9   9  -1   99.26    9.89   0
   9   9  -1   75.25    9.20   0
  -9  -9   1   88.97    9.62   0
   7   9  -1   87.93   10.77   0
   7  -9  -1   85.49   10.64   0
  -7  -9   1   82.98    9.06   0
   7   9  -1  101.62    9.55   0
  -7   9   1   81.00   10.95   0
  -7  -9   1   89.76    9.37   0
  -5  -9   1   29.09    8.70   0
   5  -9  -1   36.48   10.19   0
  -5  -9   1   31.17    8.97   0
  -5   9   1   33.51    8.87   0
   5   9  -1   35.13    9.01   0
  -3  -9   1  551.50   10.91   0
   3   9  -1  583.59   11.22   0
   3  -9  -1  549.49   12.52   0
  -3  -9   1  475.54   10.66   0
  -3   9   1  568.26   12.83   0
  -1  -9   1    6.42   10.12   0
  -1   9   1    8.38    8.37   0
  -1  -9   1    4.07   10.33   0
   1   9  -1    6.71    8.57   0
   1  -9  -1    6.66    8.27   0
   1   9   1  284.58   10.08   0
  -1  -9  -1  254.39    9.45   0
  -1   9  -1  277.83   11.56   0
   1  -9   1  246.95   11.54   0
  -1  -9  -1  262.84    9.63   0
   1  -9   1  265.90    9.72   0
   3  -9   1   23.48   10.35   0
  -3  -9  -1   15.08    8.62   0
  -3   9  -1   22.50    8.60   0
   3   9   1   24.04    8.89   0
  -3  -9  -1   20.27    8.82   0
  -5   9  -1    9.17    8.27   0
  -5  -9  -1   12.36    8.74   0
   5  -9   1    3.74   10.05   0
   5   9   1   13.10    9.13   0
  -5  -9  -1   14.18    8.56   0
  -7   9  -1    5.09    8.51   0
  -7  -9  -1   15.00    8.48   0
  -7  -9  -1    2.39    9.12   0
   7   9   1    9.77   11.40   0
  -9  -9  -1   12.89    9.48   0
   9   9   1   12.02    9.61   0
  -9  -9  -1   14.86    8.83   0
   9  -9   1   24.57   10.80   0
   9   9   1   20.57   10.82   0
  -9   9  -1   12.45    8.58   0
  11  -9   1   78.10   11.22   0
 -11  -9  -1   69.90    9.41   0
 -11  -9  -1   80.52    9.87   0
  11   9   1   87.43   10.12   0
 -11   9  -1   69.90    8.98   0
  11   9   1   75.76   11.32   0
  13  -9   1   18.45   11.31   0
  13   9   1   28.03    9.55   0
 -13   9  -1   34.24   11.27   0
  13   9   1   25.50    9.94   0
 -13  -9  -1   18.68    9.79   0
 -13  -9  -1   18.06    9.70   0
 -13   9  -1   21.37   11.20   0
 -15   9  -1  104.88   12.02   0
 -15  -9  -1  115.66   10.78   0
 -15  -9  -1  153.77   10.89   0
  15   9   1  141.75   10.91   0
 -15   9  -1  150.47   12.28   0
  15   9   1  116.62   10.54   0
  15  -9   1  143.93   12.21   0
 -17   9  -1   37.07   12.85   0
 -17  -9  -1   44.87   10.98   0
  17   9   1   25.59   10.27   0
  17  -9   1   31.55   10.38   0
 -17  -9  -1   43.98   10.55   0
  17   9   1   37.78   10.69   0
 -17   9  -1   22.21   12.41   0
  19   9   1   20.23   10.93   0
 -19   9  -1   38.84   13.29   0
  19  -9   1   16.28   10.97   0
  19   9   1   34.88   10.98   0
 -19   9  -1   25.17   13.62   0
 -19  -9  -1   19.28   11.14   0
 -19  -9  -1   26.69   11.34   0
 -21   9  -1   25.03   13.85   0
  21   9   1   24.86   11.89   0
  21   9   1   13.05   11.66   0
 -21   9  -1   32.73   14.51   0
  21  -9   1   29.79   14.34   0
 -21  -9  -1   11.62   11.98   0
 -21  -9  -1   27.51   12.17   0
 -20  10   1   19.08   14.30   0
  20  10  -1   26.71   11.40   0
 -20  10   1   10.95   16.35   0
 -20 -10   1   33.97   11.56   0
 -20 -10   1   28.71   11.88   0
  20  10  -1   19.90   11.86   0
  20 -10  -1   20.41   14.10   0
 -18 -10   1  317.01   11.57   0
 -18  10   1  354.89   14.95   0
 -18  10   1  270.21   14.90   0
  18  10  -1  282.88   13.68   0
  18 -10  -1  313.23   14.01   0
 -18 -10   1  308.78   14.61   0
  18  10  -1  345.17   12.35   0
  16  10  -1   80.59   10.23   0
  16  10  -1   84.28   10.85   0
 -16  10   1   81.41   12.99   0
 -16 -10   1   74.00   11.06   0
 -16 -10   1   68.98   10.58   0
 -16  10   1   70.30   12.85   0
  16 -10  -1   71.32   10.56   0
  14  10  -1  289.14   11.59   0
 -14  10   1  283.42   13.04   0
 -14  10   1  225.33   13.00   0
  14 -10  -1  254.67   10.78   0
 -14 -10   1  237.05   10.65   0
 -14 -10   1  240.57   11.32   0
  14  10  -1  230.24   12.54   0
  12  10  -1   23.81   10.11   0
 -12 -10   1   22.79    9.64   0
 -12  10   1    7.66   11.66   0
  12  10  -1   14.29    9.42   0
 -12 -10   1   24.40   10.27   0
  12 -10  -1   23.39    9.35   0
 -10 -10   1  204.16    9.82   0
 -10  10   1  190.70   10.13   0
  10  10  -1  206.74   11.57   0
  10  10  -1  228.87   10.64   0
  10 -10  -1  212.80   10.18   0
 -10 -10   1  206.88   10.33   0
   8 -10  -1   26.18    9.03   0
  -8 -10   1   35.84   11.42   0
   8  10  -1   34.37   11.66   0
  -8 -10   1   30.57   11.41   0
  -8  10   1   33.85    9.16   0
   6 -10  -1  292.87   11.86   0
  -6  10   1  292.95   12.23   0
  -6 -10   1  294.12   10.38   0
  -6 -10   1  271.13   10.16   0
   6  10  -1  320.42   10.32   0
   4  10  -1  132.44   11.43   0
  -4 -10   1  124.41    9.13   0
  -4  10   1  124.34    9.41   0
  -4 -10   1  135.58    9.51   0
   4 -10  -1  119.72   11.04   0
  -2 -10   1  264.46    9.77   0
  -2 -10   1  234.19    9.65   0
  -2  10   1  263.07   11.89   0
   2  10  -1  274.83    9.75   0
   2 -10  -1  255.90    9.83   0
   0 -10  -1  180.45    9.61   0
   0 -10  -1  168.63   11.03   0
   0 -10   1  162.29   11.13   0
   0 -10   1  176.27    9.37   0
   0  10   1  191.91    9.81   0
   0  10  -1  188.57    9.52   0
  -2 -10  -1  334.21    9.88   0
  -2 -10  -1  382.00   10.41   0
   2  10   1  395.91   12.41   0
  -2  10  -1  401.08   10.25   0
   2 -10   1  325.91   11.84   0
   2 -10   1  355.33   10.02   0
  -4  10  -1   22.52   10.43   0
  -4 -10  -1   21.50   10.86   0
   4 -10   1   21.48    8.40   0
   4  10   1   21.83    9.10   0
  -4 -10  -1   18.72   10.53   0
  -6 -10  -1  424.63   12.02   0
  -6 -10  -1  556.04   11.11   0
   6 -10   1  485.20   10.83   0
   6  10   1  545.53   13.19   0
  -6  10  -1  484.53   10.76   0
   8 -10   1   25.37    9.10   0
   8  10   1   31.64    9.68   0
  -8  10  -1   28.39   10.84   0
  -8 -10  -1   26.58    8.75   0
  -8 -10  -1   21.78    9.57   0
 -10  10  -1  327.16   10.50   0
  10  10   1  374.79   11.27   0
  10 -10   1  335.04   12.68   0
 -10 -10  -1  350.68   11.13   0
 -10 -10  -1  291.10   10.03   0
 -12  10  -1  273.26   12.29   0
  12 -10   1  291.91   12.63   0
  12  10   1  317.78   11.12   0
 -12 -10  -1  333.02   10.83   0
 -12 -10  -1  248.66   10.68   0
  12  10   1  272.81   10.68   0
  14  10   1  293.52   11.35   0
 -14 -10  -1  232.39   11.10   0
 -14  10  -1  207.26   12.59   0
 -14 -10  -1  274.78   11.29   0
 -14  10  -1  290.94   10.87   0
  14  10   1  275.38   10.69   0
  14 -10   1  258.61   10.85   0
  16 -10   1  382.69   14.04   0
  16  10   1  388.02   11.44   0
 -16 -10  -1  361.23   11.85   0
 -16  10  -1  370.82   11.51   0
 -16  10  -1  461.17   14.34   0
 -16 -10  -1  433.29   12.07   0
  16  10   1  448.84   12.00   0
 -18 -10  -1  122.65   11.58   0
  18  10   1  157.07   11.83   0
  18 -10   1  131.43   11.45   0
  18  10   1  146.09   11.11   0
 -18 -10  -1  158.49   11.79   0
 -18  10  -1  128.07   13.87   0
 -18  10  -1  155.91   11.67   0
  20  10   1  114.27   11.87   0
  20  10   1  108.92   12.25   0
 -20 -10  -1  120.48   12.08   0
 -20 -10  -1  120.59   12.07   0
 -20  10  -1  108.24   14.51   0
  20 -10   1  108.39   12.28   0
 -20  10  -1  133.05   14.85   0
 -19 -11   1   24.71   11.66   0
 -19  11   1   50.70   16.58   0
  19 -11  -1   44.87   11.75   0
 -19 -11   1   51.83   12.06   0
  19  11  -1   38.92   11.38   0
  19  11  -1   39.42   11.93   0
 -19  11   1   34.60   14.50   0
  17  11  -1  300.23   12.46   0
 -17 -11   1  300.51   14.98   0
  17  11  -1  260.85   11.53   0
 -17  11   1  321.90   15.12   0
 -17  11   1  259.08   14.80   0
 -17 -11   1  256.33   11.92   0
  17 -11  -1  271.73   14.31   0
  15 -11  -1   90.91   12.90   0
  15  11  -1   86.73   12.99   0
 -15  11   1   78.78   13.06   0
 -15  11   1   98.05   13.11   0
  15  11  -1  107.42   11.63   0
 -15 -11   1   92.21   10.66   0
 -15 -11   1   76.64   14.09   0
 -13 -11   1  406.51   11.95   0
 -13 -11   1  328.49   11.34   0
 -13  11   1  461.27   14.10   0
  13 -11  -1  365.31   13.50   0
  13  11  -1  363.59   11.15   0
  13  11  -1  405.10   12.07   0
 -13  11   1  360.89   14.12   0
 -11  11   1  133.70   12.62   0
 -11 -11   1  124.06   10.15   0
  11  11  -1  144.77   10.68   0
  11 -11  -1  131.08   12.22   0
  11  11  -1  123.38   10.03   0
 -11 -11   1  162.35   10.70   0
  -9  11   1  212.74   12.50   0
  -9 -11   1  224.49   10.58   0
   9  11  -1  239.59   10.93   0
  -9 -11   1  192.56   10.20   0
   7 -11  -1  178.76    9.77   0
  -7 -11   1  174.73   10.25   0
  -7  11   1  181.52   10.24   0
  -7 -11   1  165.16    9.72   0
   7  11  -1  208.85   10.50   0
  -5  11   1   38.44    9.40   0
   5  11  -1   48.83    9.53   0
  -5 -11   1   52.23    9.51   0
   5 -11  -1   39.77   10.90   0
  -5 -11   1   38.28    9.27   0
  -3 -11   1  183.76    9.96   0
   3 -11  -1  172.18   11.41   0
  -3  11   1  182.95    9.98   0
  -3 -11   1  169.97   11.61   0
   3  11  -1  190.35    9.92   0
   1  11  -1   77.37    9.34   0
   1 -11  -1   61.05    9.13   0
  -1  11   1   74.68    9.47   0
  -1 -11   1   59.50    9.15   0
   1 -11  -1   60.55    9.11   0
  -1 -11   1   52.99   11.07   0
   1 -11   1  115.27    9.41   0
   1 -11   1  128.95    9.25   0
  -1 -11  -1  140.69    9.61   0
  -1  11  -1  136.78   11.38   0
   1  11   1  127.26    9.72   0
  -1 -11  -1  121.57   11.24   0
  -3 -11  -1  144.94    9.47   0
  -3 -11  -1  176.00    9.81   0
   3  11   1  181.62   12.10   0
   3 -11   1  166.64    9.52   0
  -3  11  -1  159.78   11.80   0
   5  11   1  367.39   10.71   0
  -5  11  -1  344.59   12.37   0
  -5 -11  -1  329.91   12.47   0
  -5 -11  -1  287.38   11.96   0
   5 -11   1  320.07   12.11   0
   7 -11   1   42.67   11.22   0
  -7  11  -1   31.84    9.35   0
  -7 -11  -1   46.04    9.29   0
   7  11   1   49.32    9.85   0
  -7 -11  -1   51.75   11.84   0
  -9  11  -1  815.95   12.33   0
  -9 -11  -1  891.60   12.88   0
   9 -11   1  888.82   14.62   0
  -9 -11  -1  798.49   12.07   0
   9  11   1  973.36   13.37   0
  11  11   1   16.23   10.44   0
 -11 -11  -1   17.36   10.36   0
  11 -11   1   22.39    9.66   0
 -11 -11  -1   10.21   12.10   0
 -11  11  -1    8.20    9.79   0
  13 -11   1  750.60   14.92   0
 -13 -11  -1  784.69   12.81   0
  13  11   1  654.84   12.21   0
 -13 -11  -1  656.91   14.49   0
 -13  11  -1  703.06   12.64   0
  13  11   1  786.38   12.95   0
 -15 -11  -1   48.60   13.33   0
  15  11   1   42.24   11.26   0
 -15  11  -1   45.30   10.72   0
 -15  11  -1   30.42   12.76   0
  15  11   1   25.31   10.43   0
  15 -11   1   40.35   12.98   0
 -15 -11  -1   44.56   10.47   0
 -17  11  -1  186.39   14.34   0
 -17 -11  -1  237.20   12.20   0
 -17 -11  -1  190.98   11.62   0
 -17  11  -1  256.92   14.59   0
  17 -11   1  209.71   11.88   0
  17  11   1  218.09   11.71   0
  17  11   1  247.24   12.25   0
  19  11   1   10.51   12.06   0
 -19 -11  -1   12.72   11.84   0
 -19 -11  -1   -1.63   12.05   0
 -19  11  -1   -3.26   14.36   0
  19 -11   1    2.28   14.54   0
 -19  11  -1   -0.99   14.68   0
  19  11   1   17.91   12.03   0
 -18 -12   1   45.77   12.32   0
  18  12  -1   56.24   12.06   0
  18  12  -1   36.82   12.61   0
 -18  12   1   41.46   16.91   0
 -18  12   1   43.74   14.82   0
  18 -12  -1   50.00   12.21   0
 -18 -12   1   42.31   14.61   0
  16 -12  -1   -3.67   13.67   0
  16  12  -1    8.07   11.89   0
 -16 -12   1    1.01   13.62   0
 -16  12   1   -2.89   13.62   0
  16  12  -1   14.61   13.91   0
 -16  12   1   -0.26   13.95   0
 -16 -12   1    4.65   11.85   0
  14  12  -1  161.99   11.90   0
 -14 -12   1  151.01   11.34   0
  14 -12  -1  167.17   11.31   0
 -14  12   1  145.38   13.70   0
  14  12  -1  148.01   13.48   0
 -14 -12   1  165.70   11.78   0
 -14  12   1  190.49   13.76   0
 -12 -12   1   -1.80   10.37   0
 -12  12   1   10.29   12.81   0
  12 -12  -1    9.17   12.63   0
 -12 -12   1    0.39   13.36   0
  12  12  -1   -1.47   10.83   0
 -10 -12   1  284.68   10.89   0
  10  12  -1  342.59   11.46   0
 -10 -12   1  322.00   11.52   0
 -10  12   1  299.82   13.68   0
  -8 -12   1   27.10    9.81   0
  -8 -12   1   25.32   10.09   0
  -8  12   1   25.09   12.20   0
   8 -12  -1   25.44   11.88   0
   8  12  -1   20.78   10.01   0
  -6 -12   1  263.82   10.74   0
   6 -12  -1  239.46   12.42   0
  -6 -12   1  254.70   10.69   0
   6  12  -1  285.37   12.96   0
  -6  12   1  274.98   12.80   0
   4 -12  -1   10.00    9.26   0
   4  12  -1    9.08    9.74   0
  -4 -12   1   -3.42   11.78   0
  -4 -12   1    1.16    9.31   0
  -4  12   1    2.35    9.52   0
   2  12  -1   42.18    9.29   0
  -2 -12   1   29.88    9.30   0
   2 -12  -1   35.57   11.58   0
   2 -12  -1   39.73    9.49   0
  -2 -12   1   36.36    9.37   0
  -2  12   1   39.43    9.74   0
   0  12  -1  136.31    9.94   0
   0  12   1  148.88   10.21   0
   0 -12  -1  140.20   11.88   0
   0 -12  -1  139.56    9.77   0
   0 -12   1  139.16    9.76   0
   0 -12   1  118.51    9.92   0
  -2  12  -1   12.33   11.70   0
   2  12   1    3.38    9.65   0
   2 -12   1   -0.17    9.47   0
  -2 -12  -1    3.55   11.64   0
  -2 -12  -1    5.74   10.93   0
   2 -12   1   -1.44   11.33   0
  -4  12  -1  111.25    9.78   0
  -4 -12  -1   84.06    9.72   0
  -4 -12  -1   99.27   12.18   0
   4  12   1  131.04   12.26   0
   4 -12   1   97.39    9.44   0
   6 -12   1  124.06   11.93   0
  -6 -12  -1  111.87    9.87   0
   6  12   1  150.40   10.34   0
  -6  12  -1  125.42    9.98   0
  -6 -12  -1  137.44   12.29   0
  -8 -12  -1    7.00    9.44   0
   8  12   1    6.29   10.12   0
  -8  12  -1   10.51    9.76   0
  -8 -12  -1    5.25   10.05   0
  10  12   1  646.26   12.70   0
 -10 -12  -1  560.11   14.51   0
  10 -12   1  534.57   14.31   0
 -10  12  -1  522.70   13.80   0
 -10 -12  -1  506.72   11.59   0
 -12 -12  -1   17.07   11.03   0
  12 -12   1   14.51   12.65   0
 -12  12  -1   15.17   10.10   0
  12  12   1   18.95   11.12   0
 -12 -12  -1   15.28   10.41   0
  14 -12   1  274.95   14.12   0
  14  12   1  286.40   12.31   0
 -14  12  -1  239.40   14.05   0
 -14 -12  -1  310.53   11.96   0
 -14 -12  -1  256.28   14.02   0
 -14  12  -1  316.72   14.08   0
 -16 -12  -1   19.73   11.70   0
 -16  12  -1   -3.45   11.33   0
  16  12   1   -1.11   11.83   0
 -16  12  -1    5.23   13.59   0
  16  12   1   -5.64   11.34   0
 -16 -12  -1    2.78   11.15   0
  16 -12   1   12.01   13.95   0
 -15  13   1   21.79   14.26   0
 -15 -13   1   40.54   11.78   0
  15  13  -1   45.85   12.35   0
 -15  13   1   27.67   14.48   0
  15 -13  -1   33.28   11.72   0
 -15 -13   1   28.66   12.14   0
  13 -13  -1    8.38   10.85   0
  13  13  -1   -2.85   14.43   0
 -13  13   1   -6.78   11.02   0
 -13 -13   1    8.77   11.02   0
 -13 -13   1    5.70   11.38   0
  11  13  -1    5.26   11.16   0
 -11 -13   1   -4.40   11.19   0
 -11  13   1   -1.65   13.13   0
  11 -13  -1    2.68   12.86   0
 -11 -13   1    0.52   10.62   0
  -9 -13   1  176.49   11.09   0
   9  13  -1  195.32   11.20   0
  -9 -13   1  164.27   13.17   0
  -9  13   1  152.85   11.21   0
  -7  13   1    0.85   12.25   0
  -7 -13   1   13.50   10.38   0
  -7 -13   1    1.58   10.19   0
   7  13  -1   13.84   10.62   0
   7 -13  -1    6.00   10.07   0
   5 -13  -1   73.48    9.99   0
  -5 -13   1   58.13   12.22   0
  -5 -13   1   77.76   12.49   0
  -5  13   1   73.70   12.51   0
   5  13  -1   76.14   10.19   0
   3  13  -1   98.99   10.24   0
   3 -13  -1   94.24   11.99   0
  -3 -13   1   91.86   12.01   0
   3 -13  -1   89.97   11.95   0
  -3  13   1   97.41   10.38   0
  -3 -13   1   91.21   10.00   0
  -1  13   1  115.94   10.26   0
   1 -13  -1  114.51   10.19   0
   1  13  -1  126.73   12.22   0
  -1 -13   1   99.52   12.26   0
  -1 -13   1  100.28    9.83   0
   1 -13  -1   99.80    9.97   0
  -1 -13  -1   19.54    9.39   0
  -1  13  -1   30.70    9.70   0
   1 -13   1   23.36    9.47   0
   1 -13   1   27.31   11.50   0
   1  13   1   28.66    9.96   0
  -1 -13  -1   24.92    9.73   0
  -3  13  -1   38.42    9.82   0
   3 -13   1   38.83   12.08   0
  -3 -13  -1   35.07    9.83   0
   3  13   1   35.25   10.20   0
   3 -13   1   30.99   11.84   0
  -3 -13  -1   32.13    9.86   0
   5  13   1    2.85    9.96   0
   5 -13   1    9.63    9.89   0
  -5 -13  -1   10.40    9.72   0
  -5  13  -1   14.43   10.07   0
  -5 -13  -1   14.46    9.66   0
  -7 -13  -1  105.84   10.66   0
  -7 -13  -1   61.96   10.18   0
  -7  13  -1   84.32   12.55   0
   7 -13   1   78.78   10.20   0
   7  13   1   91.67   10.76   0
   9  13   1   52.14   10.99   0
   9 -13   1   37.92   10.37   0
  -9  13  -1   39.18   10.49   0
  -9 -13  -1   43.78   10.29   0
  -9 -13  -1   39.57   11.07   0
 -11 -13  -1    2.98   10.71   0
  11  13   1    8.35   11.14   0
  11 -13   1   22.84   13.32   0
 -11  13  -1   22.88   10.57   0
 -11 -13  -1   15.56   11.11   0
 -13  13  -1   16.01   13.41   0
 -13 -13  -1   13.83   11.56   0
 -13 -13  -1   11.42   11.49   0
  13 -13   1    2.66   13.92   0
  13  13   1    9.14   14.44   0
  15  13   1   26.22   12.01   0
 -15 -13  -1    2.02   11.91   0
 -15 -13  -1    2.45   11.68   0
 -15  13  -1   18.39   11.83   0
 -15  13  -1    9.24   11.75   0
  15 -13   1    6.17   14.36   0
 -14  14   1   47.62   15.11   0
  14  14  -1   67.17   12.80   0
 -14 -14   1   39.27   11.93   0
 -14  14   1   49.83   14.73   0
  14 -14  -1   39.76   12.01   0
 -14 -14   1   52.07   12.56   0
  12  14  -1  326.97   12.94   0
  12 -14  -1  299.93   14.65   0
 -12 -14   1  288.55   12.78   0
 -12  14   1  294.89   15.55   0
 -12 -14   1  291.96   14.97   0
  10  14  -1  172.44   11.79   0
 -10 -14   1  166.90   11.59   0
 -10  14   1  152.50   14.36   0
 -10 -14   1  160.39   11.38   0
  -8 -14   1  198.15   11.67   0
  -8 -14   1  223.69   14.07   0
   8  14  -1  231.60   11.91   0
   8 -14  -1  201.02   13.73   0
  -8  14   1  223.03   14.08   0
  -6 -14   1  169.42   10.97   0
   6  14  -1  203.20   11.01   0
   6 -14  -1  170.94   13.28   0
  -6 -14   1  210.11   11.29   0
  -6  14   1  167.87   11.39   0
  -4 -14   1    5.53   12.54   0
   4  14  -1   -6.45   12.57   0
   4 -14  -1    5.32   12.64   0
  -4  14   1    8.31   12.79   0
   4 -14  -1    5.79   12.79   0
  -4 -14   1    6.11   10.23   0
   2  14  -1  127.03   13.01   0
   2 -14  -1  112.43   12.80   0
   2 -14  -1  119.85   10.76   0
  -2 -14   1  121.95   10.65   0
  -2 -14   1  121.78   10.71   0
  -2  14   1  135.04   10.96   0
   0 -14  -1    1.21   10.10   0
   0 -14   1    6.16   10.08   0
   0  14   1   -4.46   12.63   0
   0  14  -1    5.83   12.47   0
   0 -14   1   11.02   10.05   0
   0 -14  -1    7.89    9.87   0
  -2  14  -1  320.78   13.10   0
   2 -14   1  299.65   13.61   0
   2 -14   1  321.05   13.26   0
  -2 -14  -1  323.23   13.32   0
   2  14   1  367.87   11.48   0
  -2 -14  -1  324.76   11.07   0
  -4 -14  -1    6.28   12.41   0
   4 -14   1   10.75   12.59   0
  -4 -14  -1   18.88   10.24   0
  -4  14  -1   20.91    9.92   0
   4 -14   1   18.99   12.48   0
   4  14   1   30.55   10.39   0
  -6 -14  -1  444.56   12.32   0
   6 -14   1  409.60   11.95   0
   6  14   1  449.82   12.46   0
  -6 -14  -1  378.15   11.70   0
  -6  14  -1  432.60   14.43   0
  -8 -14  -1   52.64   10.68   0
  -8  14  -1   51.96   11.00   0
  -8 -14  -1   50.61   11.30   0
   8  14   1   58.74   13.67   0
 -10 -14  -1   95.17   11.77   0
 -10 -14  -1   92.29   11.84   0
  10  14   1  139.12   11.78   0
  10 -14   1  102.88   14.15   0
 -10  14  -1  108.71   11.10   0
 -12  14  -1   65.16   14.04   0
 -12 -14  -1   67.48   11.98   0
  12  14   1   69.12   12.22   0
  12 -14   1   53.53   14.29   0
 -12 -14  -1   67.23   11.97   0
 -14 -14  -1   42.44   12.08   0
 -14  14  -1   31.93   14.95   0
  14 -14   1   45.18   12.37   0
  14  14   1   53.94   12.38   0
 -14 -14  -1   42.46   12.58   0
  11 -15  -1   35.04   14.48   0
 -11 -15   1   41.02   14.69   0
 -11  15   1   38.82   14.73   0
  11  15  -1   61.35   12.16   0
 -11 -15   1   37.08   12.45   0
   9  15  -1   50.27   14.11   0
  -9 -15   1   43.88   11.73   0
  -9 -15   1   19.86   11.69   0
  -9  15   1   27.75   14.44   0
   7 -15  -1   77.73   13.79   0
  -7  15   1   79.30   14.20   0
   7  15  -1   88.73   11.76   0
  -7 -15   1   76.49   13.99   0
  -7 -15   1   87.67   13.89   0
  -5  15   1  132.49   11.40   0
   5 -15  -1  108.61   11.15   0
   5  15  -1  131.79   11.45   0
  -5 -15   1  120.09   11.31   0
   5 -15  -1   95.31   11.16   0
  -5 -15   1  104.62   13.63   0
   3  15  -1  161.02   11.35   0
   3 -15  -1  123.62   13.66   0
  -3  15   1  155.13   14.02   0
   3 -15  -1  107.42   11.29   0
  -3 -15   1  140.90   11.26   0
  -3 -15   1  123.32   13.34   0
  -1 -15   1  266.05   11.73   0
   1 -15  -1  267.78   13.81   0
  -1 -15   1  272.78   11.65   0
   1  15  -1  307.67   14.18   0
   1 -15  -1  292.62   14.24   0
  -1  15   1  315.61   14.47   0
  -1 -15  -1   81.59   13.37   0
   1  15   1  112.37   11.43   0
  -1 -15  -1   84.20   11.07   0
   1 -15   1   92.05   13.50   0
   1 -15   1  103.55   10.99   0
  -1  15  -1  108.06   11.26   0
   3  15   1   91.94   13.79   0
  -3 -15  -1   78.84   10.90   0
   3 -15   1   87.08   13.19   0
  -3  15  -1   82.70   11.18   0
  -3 -15  -1   88.00   11.02   0
   3 -15   1   86.09   13.51   0
  -5 -15  -1  113.36   13.51   0
   5 -15   1  115.63   13.89   0
  -5 -15  -1  131.79   11.39   0
   5 -15   1  109.89   14.32   0
   5  15   1  143.47   11.75   0
  -5  15  -1  129.32   11.39   0
   7 -15   1   -5.54   13.65   0
  -7 -15  -1  -12.34   13.43   0
  -7 -15  -1    4.22   14.08   0
  -7  15  -1   11.42   11.21   0
   7  15   1   -1.13   11.69   0
   7 -15   1   -9.12   11.32   0
  -9 -15  -1  140.70   11.97   0
  -9  15  -1  164.83   12.20   0
   9 -15   1  174.09   14.94   0
  -9 -15  -1  167.34   12.51   0
   9  15   1  186.23   12.33   0
  11 -15   1   -0.28   14.77   0
 -11 -15  -1    8.22   11.79   0
  11  15   1    6.05   12.15   0
 -11  15  -1    7.24   14.72   0
 -11 -15  -1   17.51   15.11   0
  -8 -16   1   36.73   14.89   0
   8  16  -1   39.94   12.28   0
  -8 -16   1   30.56   12.11   0
  -8  16   1   28.33   15.19   0
   8 -16  -1   34.54   14.87   0
   6  16  -1  108.30   12.19   0
  -6 -16   1   79.65   12.04   0
  -6 -16   1   72.96   12.20   0
   6 -16  -1   72.45   12.02   0
   6 -16  -1   70.22   12.11   0
  -6  16   1   78.93   15.05   0
   4 -16  -1    6.99   13.91   0
  -4  16   1   13.96   11.67   0
  -4 -16   1   11.82   11.55   0
  -4 -16   1   -0.15   14.17   0
   4  16  -1   10.98   14.44   0
   4 -16  -1    4.51   13.97   0
   2 -16  -1  238.50   14.75   0
  -2 -16   1  234.59   12.28   0
   2 -16  -1  204.35   14.23   0
  -2  16   1  256.04   12.78   0
   2  16  -1  297.02   12.65   0
  -2 -16   1  224.95   14.69   0
   0  16  -1   17.62   11.25   0
   0 -16  -1   22.75   11.72   0
   0 -16   1   38.74   11.48   0
   0 -16  -1   25.88   13.95   0
   0 -16   1   18.20   14.01   0
   0  16   1   28.06   11.86   0
  -2 -16  -1  148.01   14.33   0
   2 -16   1  141.03   11.71   0
  -2 -16  -1  158.78   14.64   0
   2  16   1  185.85   12.39   0
  -2  16  -1  173.55   14.53   0
   2 -16   1  160.08   11.75   0
  -4 -16  -1   44.20   11.71   0
   4  16   1   27.62   12.10   0
   4 -16   1   17.53   14.17   0
  -4 -16  -1   31.38   14.13   0
  -4  16  -1   32.27   11.78   0
   4 -16   1   36.65   14.15   0
   6 -16   1   13.35   14.58   0
   6 -16   1    8.29   14.24   0
  -6  16  -1    7.15   14.36   0
   6  16   1   12.01   14.95   0
  -6 -16  -1   14.44   11.78   0
  -6 -16  -1    1.86   11.42   0
  -8 -16  -1    4.87   11.72   0
   8  16   1    8.88   12.31   0
  -8  16  -1   12.86   14.53   0
  -8 -16  -1    3.80   12.36   0
   8 -16   1    5.37   14.53   0
 -24   0   2  181.55   15.55   0
 -24   0   2  178.84   11.73   0
  24   0  -2  167.59   11.62   0
  24   0  -2  175.30   14.52   0
  22   0  -2   -5.81   10.57   0
  22   0  -2    6.90   10.34   0
 -22   0   2    7.74   13.41   0
 -22   0   2   17.79   10.75   0
 -20   0   2  180.61   10.44   0
  20   0  -2  197.39   12.49   0
 -20   0   2  176.43   13.20   0
  20   0  -2  157.04   10.12   0
  18   0  -2   60.96    9.27   0
 -18   0   2   64.69   12.09   0
 -18   0   2   63.06    9.43   0
  18   0  -2   63.71   11.22   0
  16   0  -2  497.95   10.34   0
 -16   0   2  579.12   12.10   0
 -16   0   2  511.97   10.45   0
  16   0  -2  615.71   11.53   0
 -14   0   2    4.28   10.62   0
  14   0  -2    8.21   10.09   0
 -14   0   2   -4.08    8.12   0
  14   0  -2    2.95    8.10   0
  12   0  -2  741.64   11.02   0
 -12   0   2  770.05   11.36   0
 -12   0   2  851.21   13.74   0
  12   0  -2  841.99   13.28   0
  10   0  -2   48.99   10.28   0
  10   0  -2   47.67    8.01   0
 -10   0   2   44.93    8.12   0
 -10   0   2   52.59   10.75   0
  -8   0   2  907.45   12.80   0
   8   0  -2 1140.22   17.81   0
  -8   0   2 1049.10   18.22   0
   8   0  -2  947.60   14.00   0
  -6   0   2   18.86   10.72   0
   6   0  -2   26.16   11.20   0
  -6   0   2   26.25   11.26   0
   6   0  -2   19.27    8.54   0
  -4   0   2 4400.24   41.76   0
   4   0  -2 4252.82   27.93   0
   4   0  -2 4580.94   43.26   0
  -4   0   2 4243.51   28.78   0
  -2   0   2  145.89   14.86   0
   2   0  -2  152.47   14.83   0
  -2   0  -2 1276.89   23.25   0
   2   0   2 1232.50   22.78   0
  -2   0  -2 1572.64   19.52   0
   2   0   2 1585.62   19.90   0
   4   0   2 1240.12   19.42   0
   4   0   2 1451.64   17.06   0
  -4   0  -2 1530.22   17.15   0
  -4   0  -2 1217.33   18.41   0
  -6   0  -2  663.70   13.42   0
   6   0   2  717.73   13.45   0
   6   0   2  749.49   12.62   0
  -6   0  -2  836.46   12.79   0
  -8   0  -2 1364.54   16.13   0
   8   0   2 1597.54   15.39   0
  -8   0  -2 1694.55   15.19   0
   8   0   2 1345.08   15.29   0
 -10   0  -2  286.31   11.22   0
  10   0   2  247.95   11.30   0
 -10   0  -2  245.89   11.01   0
  10   0   2  307.21    9.55   0
 -12   0  -2  324.50    9.70   0
  12   0   2  246.99   11.25   0
  12   0   2  323.97    9.62   0
 -12   0  -2  285.09   11.19   0
  14   0   2  155.88    8.88   0
  14   0   2  136.37    8.91   0
 -14   0  -2  123.99    8.81   0
 -14   0  -2  175.89    9.11   0
  16   0   2   17.29    8.85   0
 -16   0  -2   11.55    9.06   0
  16   0   2   24.22    8.47   0
 -16   0  -2   11.75    8.74   0
 -18   0  -2  189.00    9.51   0
  18   0   2  186.86    9.90   0
  18   0   2  217.10   10.03   0
 -18   0  -2  218.55   12.52   0
 -20   0  -2   65.71    9.87   0
 -20   0  -2   78.42   12.79   0
  20   0   2   51.92    9.88   0
  20   0   2   76.19    9.87   0
 -22   0  -2  195.07   10.91   0
  22   0   2  173.97   13.14   0
  22   0   2  220.45   11.02   0
 -22   0  -2  204.46   11.69   0
 -24   0  -2   30.66   11.46   0
 -24   0  -2   34.08   12.08   0
  24   0   2   24.95   11.40   0
  24   0   2   31.54   11.34   0
  25   1  -2   29.04   11.77   0
  25   1  -2   22.13   11.63   0
 -25   1   2   36.84   15.58   0
 -25  -1   2   24.45   13.04   0
  25  -1  -2   20.53   13.94   0
 -25   1   2   32.60   11.71   0
  25  -1  -2   18.63   11.76   0
 -25  -1   2   27.48   11.80   0
  23  -1  -2  112.59   13.33   0
  23   1  -2  107.99   11.04   0
 -23  -1   2  108.58   11.11   0
 -23  -1   2  106.15   12.03   0
 -23   1   2  111.00   10.95   0
 -23   1   2  100.28   14.68   0
  23  -1  -2   94.13   10.76   0
  23   1  -2   98.95   13.60   0
  21   1  -2    8.21    9.76   0
  21  -1  -2   18.74    9.85   0
 -21   1   2   15.94   13.24   0
 -21  -1   2   13.13   12.94   0
  21   1  -2   15.64   12.06   0
 -21   1   2   12.91    9.96   0
 -21  -1   2   17.77    9.95   0
  21  -1  -2   11.82   11.86   0
 -19   1   2  166.27   11.95   0
  19  -1  -2  153.62    9.71   0
  19   1  -2  154.03    9.78   0
 -19  -1   2  193.03   12.76   0
 -19   1   2  173.18   13.02   0
  19  -1  -2  207.92   12.12   0
  19   1  -2  205.51   12.28   0
 -19  -1   2  188.07   10.05   0
  17  -1  -2    6.20    8.55   0
  17   1  -2   11.09   10.88   0
 -17   1   2   13.31   11.75   0
 -17  -1   2    5.46   11.37   0
 -17  -1   2   12.60    8.79   0
  17   1  -2    4.86    8.69   0
  17  -1  -2    9.07   10.83   0
 -17   1   2    7.15   10.70   0
  15  -1  -2  114.70    8.77   0
  15  -1  -2  142.44   10.71   0
 -15  -1   2  143.35    9.66   0
  15   1  -2  136.48   11.11   0
 -15   1   2  134.26   11.72   0
  15   1  -2  119.73   10.73   0
 -15   1   2  129.36    8.92   0
 -15  -1   2  136.90    9.12   0
  13   1  -2  389.06    9.73   0
 -13  -1   2  381.87    9.84   0
 -13  -1   2  447.85   12.78   0
  13   1  -2  436.02   12.12   0
 -13   1   2  379.60    9.81   0
 -13   1   2  427.90   13.18   0
  13  -1  -2  446.81   12.38   0
  13  -1  -2  376.47   11.19   0
 -11   1   2  342.49    9.64   0
 -11  -1   2  371.20   12.72   0
  11  -1  -2  342.89    9.63   0
  11   1  -2  379.05   10.98   0
  11   1  -2  318.11    9.57   0
  11  -1  -2  384.07   12.32   0
 -11   1   2  396.67   13.34   0
 -11  -1   2  332.65    9.93   0
  -9   1   2 1003.26   17.64   0
   9  -1  -2  948.55   17.61   0
  -9  -1   2  940.76   16.44   0
   9   1  -2 1008.90   16.17   0
   9  -1  -2  851.42   11.97   0
   9   1  -2  823.18   13.19   0
  -9   1   2  851.11   11.99   0
  -9  -1   2  843.94   12.14   0
  -7   1   2  788.41   12.68   0
   7  -1  -2  837.19   12.70   0
  -7   1   2  966.63   20.84   0
   7  -1  -2  975.27   19.28   0
   7   1  -2  802.42   12.63   0
   7   1  -2  991.05   17.01   0
  -7  -1   2  880.87   16.74   0
  -7  -1   2  789.53   12.83   0
  -5  -1   2  584.88   12.91   0
   5   1  -2  569.82   14.06   0
   5  -1  -2  607.11   12.64   0
  -5  -1   2  652.06   14.75   0
   5   1  -2  663.69   15.14   0
   5  -1  -2  655.88   22.65   0
  -5   1   2  640.03   23.50   0
   3   1  -2  147.97   11.93   0
  -3  -1   2  153.71   13.80   0
   3   1  -2  140.98   13.07   0
  -3  -1   2  141.79   11.18   0
   1   1  -2 2960.79   38.33   0
  -1  -1   2 2663.84   27.22   0
   1   1  -2 2735.35   27.87   0
  -1   1   2 3282.72   40.95   0
   1  -1  -2 3332.21   39.45   0
   1   1   2  561.60   15.19   0
  -1   1  -2  444.20   25.94   0
  -1  -1  -2  573.46   15.03   0
  -3  -1  -2 3718.65   28.01   0
  -3  -1  -2 4626.03   28.43   0
   3   1   2 3675.62   27.75   0
   3   1   2 4442.68   29.34   0
  -3   1  -2 3906.64   36.67   0
  -3   1  -2 4718.29   28.50   0
   3  -1   2 3789.46   36.09   0
  -5  -1  -2  528.30   14.22   0
   5  -1   2  563.30   14.72   0
   5  -1   2  626.85   12.45   0
  -5   1  -2  558.94   14.27   0
  -5  -1  -2  634.81   12.41   0
   5   1   2  517.19   14.09   0
   5   1   2  624.64   12.44   0
  -5   1  -2  623.58   13.87   0
  -7  -1  -2  358.69   10.90   0
   7   1   2  427.99   10.76   0
   7   1   2  378.38   11.08   0
   7  -1   2  493.20   10.80   0
  -7   1  -2  450.44   12.32   0
  -7   1  -2  403.72   11.20   0
  -7  -1  -2  478.65   10.72   0
   7  -1   2  368.93   12.80   0
   9  -1   2    8.10    9.72   0
  -9   1  -2   14.79    7.92   0
   9   1   2    2.15   10.33   0
   9  -1   2    2.19    7.77   0
  -9  -1  -2   10.34    8.03   0
  -9   1  -2    9.70    9.44   0
   9   1   2    1.41    7.99   0
  -9  -1  -2    8.13    8.32   0
 -11  -1  -2  236.77   11.21   0
 -11  -1  -2  263.81    9.69   0
 -11   1  -2  235.04   10.74   0
  11   1   2  262.92    9.47   0
 -11   1  -2  270.67    9.64   0
  11   1   2  209.16    9.41   0
  11  -1   2  267.37    9.27   0
  11  -1   2  234.54    9.45   0
 -13  -1  -2   -2.15   10.47   0
  13  -1   2    5.50    8.19   0
  13   1   2    3.99    8.22   0
 -13   1  -2   -0.63   10.09   0
 -13  -1  -2   -0.59    8.52   0
 -13   1  -2   -1.19   10.24   0
  13   1   2   -2.59    8.42   0
  13  -1   2    1.89    8.35   0
  15  -1   2  546.73   12.38   0
 -15   1  -2  597.98   10.86   0
  15   1   2  545.76   12.27   0
 -15  -1  -2  675.37   11.30   0
 -15   1  -2  635.29   11.04   0
  15  -1   2  661.97   10.86   0
  15   1   2  661.95   10.95   0
 -15  -1  -2  572.20   10.85   0
 -17  -1  -2  181.33   11.34   0
  17  -1   2  165.19    9.61   0
 -17  -1  -2  208.42    9.88   0
  17   1   2  170.82    9.50   0
 -17   1  -2  199.14   11.78   0
  17  -1   2  214.76    9.38   0
  17   1   2  200.62    9.80   0
 -17   1  -2  192.78   11.35   0
  19   1   2  245.58   10.40   0
 -19   1  -2  303.43   10.83   0
 -19  -1  -2  249.30   10.25   0
 -19   1  -2  253.42   10.32   0
 -19  -1  -2  289.62   11.01   0
  19   1   2  297.31   10.41   0
  19  -1   2  289.52   12.30   0
  19  -1   2  234.03   10.41   0
 -21   1  -2   20.64   12.24   0
  21   1   2   37.38   12.23   0
 -21  -1  -2   21.48   13.24   0
  21  -1   2   19.98    9.90   0
 -21   1  -2   37.20   10.67   0
  21  -1   2   38.53   12.33   0
 -21  -1  -2   27.14    9.95   0
  21   1   2   15.70   12.15   0
 -23   1  -2   68.26   11.37   0
 -23   1  -2  109.20   14.44   0
 -23  -1  -2   93.31   14.33   0
  23  -1   2   69.45   11.12   0
  23   1   2   88.96   11.08   0
  23   1   2   62.94   11.16   0
 -23  -1  -2   86.55   10.99   0
  24  -2  -2   17.79   11.02   0
 -24   2   2    6.77   15.17   0
 -24  -2   2   13.78   14.75   0
  24   2  -2    9.20   11.08   0
 -24   2   2   13.20   11.46   0
 -24  -2   2   12.57   11.33   0
  24   2  -2    4.87   11.36   0
  22  -2  -2   14.14   10.16   0
 -22  -2   2   14.81   10.66   0
 -22  -2   2   15.50   11.26   0
 -22   2   2   33.44   13.79   0
 -22   2   2   19.96   10.60   0
  22   2  -2   21.69   10.61   0
  22   2  -2   18.39   10.64   0
  20  -2  -2   46.92    9.81   0
 -20   2   2   49.10    9.68   0
  20  -2  -2   53.10   11.66   0
  20   2  -2   45.71   10.07   0
 -20  -2   2   46.05   10.18   0
 -20  -2   2   63.41   12.77   0
  20   2  -2   53.88   12.05   0
 -20   2   2   52.16   13.13   0
  18   2  -2  183.14    9.90   0
 -18   2   2  209.21   12.97   0
  18   2  -2  204.92   10.02   0
 -18   2   2  175.60    9.72   0
 -18  -2   2  178.22   10.04   0
 -18  -2   2  182.16   12.30   0
  18  -2  -2  199.89   11.85   0
  18  -2  -2  180.18    9.78   0
  16  -2  -2    7.33    8.67   0
 -16   2   2    9.67    8.80   0
 -16   2   2    9.21   11.45   0
  16  -2  -2    1.85   10.28   0
  16   2  -2    3.38    8.83   0
 -16  -2   2    5.81    9.21   0
 -16  -2   2    6.66   11.05   0
  16   2  -2    2.62    8.83   0
 -14   2   2    7.91    8.43   0
  14   2  -2   15.24    8.30   0
 -14  -2   2    3.00    8.56   0
  14   2  -2    8.84    8.50   0
 -14  -2   2    2.66   10.73   0
  14  -2  -2    7.51    8.26   0
  14  -2  -2    4.01   10.06   0
 -14   2   2    5.96   11.20   0
 -12   2   2  539.90   15.50   0
 -12  -2   2  475.20   10.30   0
  12   2  -2  445.89   10.06   0
  12   2  -2  542.95   12.81   0
 -12   2   2  449.40    9.87   0
 -12  -2   2  489.69   12.78   0
  12  -2  -2  559.97   13.14   0
  12  -2  -2  489.59    9.97   0
  10   2  -2  701.07   11.37   0
  10   2  -2  880.70   13.40   0
  10  -2  -2  826.91   16.50   0
 -10  -2   2  854.31   13.41   0
 -10   2   2  898.30   16.58   0
  10  -2  -2  744.04   12.86   0
 -10  -2   2  751.19   11.67   0
 -10   2   2  732.48   12.80   0
   8   2  -2  500.14   13.63   0
  -8  -2   2  454.44   12.35   0
  -8   2   2  530.39   18.01   0
   8  -2  -2  547.43   16.16   0
  -8  -2   2  464.14   13.51   0
   8   2  -2  423.38   10.55   0
   8  -2  -2  472.19   10.40   0
   6  -2  -2  251.01    9.92   0
  -6  -2   2  272.95   12.91   0
   6   2  -2  279.08   11.10   0
  -6   2   2  290.52   17.56   0
   6   2  -2  234.77   10.01   0
  -6  -2   2  237.46   11.92   0
  -4  -2   2  187.57   12.63   0
  -4  -2   2  177.17   10.64   0
   4   2  -2  187.70   10.84   0
   4   2  -2  175.35   12.34   0
   2   2  -2 9784.10   43.87   0
  -2  -2   2 9711.61   43.02   0
  -2  -2   2 9490.53   54.35   0
   0  -2   2   78.95   10.16   0
   0   2  -2   73.27   12.11   0
   0  -2  -2   93.53   13.52   0
   0   2   2   89.30   13.05   0
  -2  -2  -2 7240.08   36.47   0
   2   2   2 9311.67   41.95   0
  -2   2  -2 7597.32   35.76   0
  -2  -2  -2 9540.70   42.07   0
   4  -2   2  272.38   13.35   0
   4   2   2  284.79   11.10   0
  -4  -2  -2  321.40   13.01   0
   4   2   2  241.18   12.73   0
  -4  -2  -2  252.15   10.82   0
  -4   2  -2  266.90   14.19   0
  -6   2  -2   98.80   10.41   0
  -6  -2  -2  115.46    9.17   0
  -6   2  -2  119.86    9.22   0
   6   2   2  114.40    8.98   0
   6   2   2   92.89    9.19   0
   6  -2   2  103.64   10.89   0
  -6  -2  -2   85.34    9.31   0
  -8   2  -2  206.62   10.94   0
   8   2   2  181.77    9.30   0
  -8  -2  -2  181.41    9.51   0
  -8  -2  -2  210.28    9.34   0
   8  -2   2  177.47   10.65   0
  -8   2  -2  177.15   10.63   0
   8   2   2  198.39    9.22   0
  10  -2   2  297.41    9.56   0
  10   2   2  276.36    9.88   0
 -10   2  -2  331.05   11.34   0
 -10  -2  -2  363.42   10.09   0
  10   2   2  363.96    9.84   0
 -10   2  -2  308.05   11.09   0
 -10  -2  -2  289.33    9.98   0
 -12   2  -2    7.83    7.93   0
  12  -2   2    6.34    8.09   0
  12   2   2   10.05    8.37   0
 -12   2  -2   12.39    9.72   0
 -12  -2  -2   -2.64    8.35   0
 -12  -2  -2    8.32    8.61   0
  12   2   2   12.64    8.33   0
  14   2   2   40.74    8.70   0
  14  -2   2   47.27   10.57   0
 -14  -2  -2   41.50   10.33   0
 -14  -2  -2   54.26    9.09   0
 -14   2  -2   44.57    8.61   0
 -14   2  -2   51.74   10.54   0
  14   2   2   49.23   10.48   0
 -16   2  -2    4.54    8.96   0
  16   2   2   -1.92   10.86   0
 -16  -2  -2   -0.79    9.02   0
  16   2   2   -1.20    8.62   0
 -16   2  -2   15.70   10.78   0
 -16  -2  -2   -4.22    9.01   0
  16  -2   2    6.76   11.08   0
 -18   2  -2  230.03   12.26   0
  18   2   2  176.78    9.88   0
  18  -2   2  193.11   12.04   0
 -18  -2  -2  207.04   12.15   0
 -18  -2  -2  242.36   12.52   0
  18   2   2  228.81   10.21   0
 -18   2  -2  201.12   11.80   0
  20  -2   2   10.23   10.03   0
 -20   2  -2   10.78   12.34   0
 -20  -2  -2   -6.70   10.28   0
  20   2   2   10.62    9.74   0
 -20  -2  -2    8.60    9.82   0
  20   2   2   11.85   12.06   0
 -20   2  -2    7.45   12.06   0
  22   2   2   -2.13   10.29   0
 -22  -2  -2    9.91   10.91   0
  22  -2   2    5.53   10.59   0
 -22   2  -2   10.03   12.93   0
 -22  -2  -2    2.80   10.41   0
  22   2   2    1.28   10.52   0
 -22   2  -2   -8.68   13.94   0
 -24   2  -2   -3.78   14.89   0
  24   2   2    1.15   11.34   0
 -24  -2  -2   -0.03   12.02   0
 -24  -2  -2    9.71   14.07   0
  24   2   2   11.83   11.40   0
 -24   2  -2    6.91   11.41   0
  24  -2   2   -2.22   14.09   0
 -25   3   2   16.24   15.85   0
  25  -3  -2    8.88   14.08   0
  25   3  -2    5.29   11.65   0
 -25  -3   2   17.16   12.78   0
  25   3  -2   16.21   11.77   0
 -25  -3   2   10.27   12.18   0
 -23  -3   2   47.37   11.24   0
  23  -3  -2   47.51   10.88   0
 -23  -3   2   58.76   11.90   0
  23   3  -2   80.44   11.39   0
 -23   3   2   68.16   14.83   0
  23   3  -2   62.32   13.51   0
  21  -3  -2   -1.31   12.06   0
  21   3  -2    5.12    9.97   0
 -21  -3   2   14.69   10.51   0
 -21  -3   2    6.57    9.94   0
 -21   3   2    1.48   13.57   0
  21   3  -2    9.51   12.18   0
 -19   3   2  175.03   13.39   0
 -19  -3   2  175.18   10.60   0
  19   3  -2  172.70   10.24   0
  19  -3  -2  144.17    9.72   0
  19   3  -2  140.89    9.99   0
 -19  -3   2  136.17   12.07   0
  17   3  -2   22.68    9.16   0
  17   3  -2   27.16   11.32   0
 -17  -3   2   27.07    9.61   0
  17  -3  -2   32.40    9.18   0
 -17  -3   2   34.53    9.19   0
 -17   3   2   31.67    9.01   0
 -17   3   2   36.03   11.94   0
 -15  -3   2  378.12   10.86   0
  15   3  -2  399.72   12.20   0
  15   3  -2  346.18   10.00   0
 -15   3   2  393.60   13.33   0
  15  -3  -2  340.90    9.87   0
 -15  -3   2  338.61   11.80   0
 -13  -3   2   -0.74    8.51   0
  13  -3  -2    3.29    8.19   0
  13   3  -2    1.92   10.37   0
  13   3  -2    2.61    8.35   0
 -13   3   2    3.29   12.56   0
 -13  -3   2    8.59    9.01   0
 -11  -3   2  836.93   11.71   0
 -11  -3   2  931.52   13.06   0
  11   3  -2  859.05   12.04   0
 -11   3   2  988.57   18.10   0
  11   3  -2  941.08   14.51   0
  11  -3  -2  847.26   13.04   0
   9   3  -2  126.02    8.88   0
   9   3  -2  156.66   11.27   0
  -9   3   2  153.59   12.83   0
   9  -3  -2  135.78    8.75   0
  -9  -3   2  137.20    9.04   0
  -9  -3   2  129.77   11.02   0
   7   3  -2  700.17   12.88   0
  -7  -3   2  559.64   11.78   0
   7  -3  -2  623.57   11.50   0
  -7   3   2  579.12   18.57   0
  -7  -3   2  654.32   12.36   0
  -7   3   2  736.49   20.08   0
   7   3  -2  581.58   11.59   0
  -5   3   2    9.23   14.48   0
  -5  -3   2   11.32   10.82   0
  -5  -3   2    7.61    8.96   0
   5   3  -2    5.60    8.72   0
   5   3  -2   13.21    9.14   0
   3   3  -2 3483.39   28.14   0
  -3  -3   2 3479.21   29.27   0
   3   3  -2 3786.05   25.63   0
  -3  -3   2 3855.35   26.33   0
  -3   3   2 4005.74   44.56   0
   3  -3  -2 3996.95   42.42   0
   1   3  -2  417.57   16.96   0
  -1   3   2  487.82   16.77   0
   1   3  -2  437.82   12.38   0
  -1  -3   2  417.15   13.72   0
   1  -3  -2  501.40   16.27   0
  -1  -3   2  410.77   18.00   0
  -1  -3  -2 9999.99   44.64   0
   1  -3   2 8122.98   35.04   0
  -1   3  -2 8317.11   35.07   0
   1   3   2 9831.22   45.12   0
   3   3   2  182.60   12.04   0
   3   3   2  235.51   10.96   0
  -3  -3  -2  232.88   10.82   0
  -3   3  -2  177.95   10.08   0
  -3  -3  -2  178.13   10.24   0
   3  -3   2  207.11   14.22   0
   5  -3   2    2.24    9.67   0
   5   3   2    3.35    8.73   0
  -5  -3  -2    3.28    8.56   0
  -5  -3  -2    1.09    8.88   0
   5   3   2    6.58    8.43   0
  -5   3  -2    3.34    9.53   0
  -7  -3  -2   11.15    8.26   0
   7  -3   2    6.34    9.37   0
  -7  -3  -2    1.72    8.35   0
  -7   3  -2    5.98    9.51   0
  -7   3  -2    9.24    9.79   0
   7   3   2    1.67   10.15   0
   7   3   2   11.84    8.15   0
   9  -3   2  723.54   13.15   0
  -9  -3  -2  669.18   11.70   0
  -9   3  -2  900.66   12.12   0
  -9  -3  -2  880.48   12.19   0
  -9   3  -2  761.00   13.28   0
   9   3   2  674.57   11.53   0
   9   3   2  798.81   12.07   0
  11   3   2  179.56    9.33   0
  11   3   2  144.82    8.96   0
 -11  -3  -2  143.04    9.01   0
  11  -3   2  150.17   10.44   0
 -11  -3  -2  175.16    9.32   0
 -11   3  -2  175.47   10.33   0
 -11   3  -2  147.43   10.02   0
 -13  -3  -2   96.66    9.41   0
 -13   3  -2   86.65    8.50   0
  13   3   2   68.72    8.99   0
 -13  -3  -2   74.28    8.74   0
  13  -3   2   78.75   10.55   0
 -13   3  -2   89.85    8.69   0
  13   3   2   87.46    9.02   0
 -15  -3  -2  632.12   11.33   0
  15  -3   2  510.39   12.40   0
 -15  -3  -2  539.53   10.63   0
  15   3   2  500.43   12.38   0
 -15   3  -2  656.64   11.25   0
  15   3   2  615.05   11.25   0
 -15   3  -2  552.25   12.54   0
 -17  -3  -2   26.69    9.26   0
 -17   3  -2   13.68    9.18   0
  17   3   2   18.27    9.27   0
 -17  -3  -2   28.22    9.47   0
  17  -3   2   19.49    9.25   0
 -17   3  -2   21.57    9.24   0
  17   3   2   17.94    9.24   0
 -19  -3  -2  359.46   11.33   0
  19  -3   2  289.56   10.69   0
  19   3   2  282.33   10.39   0
 -19   3  -2  357.90   11.09   0
 -19  -3  -2  311.18   10.40   0
  19   3   2  343.09   10.86   0
 -19   3  -2  323.02   10.77   0
 -21   3  -2   23.47   13.01   0
 -21  -3  -2   20.89   10.65   0
  21  -3   2   13.47   12.71   0
 -21   3  -2   21.59   10.30   0
  21   3   2   10.91   12.48   0
 -21  -3  -2   14.11   10.07   0
  21   3   2   14.42   10.49   0
 -23  -3  -2   16.56   11.13   0
  23   3   2   33.55   13.57   0
 -23  -3  -2   36.56   14.47   0
  23  -3   2   22.30   11.30   0
 -23   3  -2   25.07   13.43   0
 -23   3  -2   31.35   14.40   0
  23   3   2   27.39   11.18   0
 -24   4   2  111.54   15.88   0
  24   4  -2   84.35   13.96   0
 -24  -4   2  119.72   15.33   0
 -24  -4   2  109.26   11.84   0
  24   4  -2  104.29   14.45   0
  24  -4  -2   84.03   13.80   0
 -22  -4   2   10.83   10.67   0
 -22   4   2    3.47   14.30   0
  22  -4  -2    1.05   10.26   0
  22   4  -2   13.71   10.64   0
  22   4  -2    5.14   10.53   0
 -22  -4   2    4.08   11.41   0
 -20   4   2  197.86   13.80   0
  20  -4  -2  175.10   10.19   0
 -20  -4   2  167.61   13.34   0
  20   4  -2  176.04   12.68   0
 -20  -4   2  167.47   10.64   0
  20   4  -2  165.63   12.36   0
  18   4  -2   18.03    9.27   0
 -18  -4   2   24.85    9.54   0
  18   4  -2   34.13   11.67   0
 -18  -4   2   32.19    9.94   0
 -18   4   2   33.51   12.28   0
  18  -4  -2   33.77    9.27   0
  16   4  -2  419.19   10.43   0
  16   4  -2  532.30   11.28   0
  16  -4  -2  476.72   10.34   0
 -16  -4   2  496.21   11.36   0
 -16   4   2  536.21   15.81   0
 -16  -4   2  421.78   12.49   0
  14   4  -2  163.10    9.11   0
  14   4  -2  173.03   11.57   0
 -14  -4   2  145.65   10.93   0
 -14   4   2  172.48   11.91   0
 -14  -4   2  167.28    9.84   0
  14  -4  -2  153.03    8.99   0
  12   4  -2  481.22   12.08   0
 -12   4   2  590.29   14.41   0
  12   4  -2  591.35   11.54   0
 -12  -4   2  487.47   10.67   0
 -12  -4   2  550.37   11.37   0
  12  -4  -2  521.70   10.50   0
  10   4  -2  101.88    8.75   0
 -10   4   2  100.00   12.03   0
 -10   4   2  118.05   12.45   0
  10   4  -2  113.00    9.40   0
 -10  -4   2   93.89    8.76   0
 -10  -4   2  107.46   11.41   0
  10  -4  -2  111.74    8.63   0
   8   4  -2  436.50   11.92   0
   8   4  -2  534.05   11.53   0
  -8   4   2  547.43   15.92   0
  -8   4   2  421.36   14.95   0
  -8  -4   2  408.22   10.38   0
   8  -4  -2  467.50   10.59   0
  -8  -4   2  469.32   11.19   0
   6   4  -2   32.66    9.05   0
  -6  -4   2   26.94    8.69   0
  -6   4   2   36.99   13.83   0
  -6  -4   2   30.31    8.93   0
   6   4  -2   36.11    8.37   0
  -4  -4   2 1168.32   16.51   0
   4   4  -2 1215.38   16.95   0
  -4   4   2 1323.25   23.32   0
   4  -4  -2 1265.13   21.99   0
  -4  -4   2 1276.69   15.41   0
   4   4  -2 1284.19   15.58   0
  -2   4   2  441.24   16.49   0
  -2  -4   2  422.74   11.49   0
   2  -4  -2  467.24   15.99   0
  -2  -4   2  388.96   14.12   0
   2   4  -2  398.37   14.87   0
   2   4  -2  446.14   11.71   0
   0   4   2 1354.34   19.79   0
   0  -4   2 1184.29   22.48   0
   0   4  -2 1332.79   15.45   0
   0  -4  -2 1412.32   18.34   0
   0  -4   2 1250.07   15.33   0
  -2   4  -2  649.02   13.61   0
  -2  -4  -2  612.17   12.40   0
   2  -4   2  658.79   12.30   0
   2   4   2  742.80   14.28   0
  -2  -4  -2  819.99   15.64   0
  -4  -4  -2  729.63   13.04   0
   4   4   2  589.66   11.61   0
  -4   4  -2  566.37   11.80   0
  -4  -4  -2  541.80   11.53   0
   4   4   2  701.27   13.26   0
   4  -4   2  624.39   16.60   0
  -6  -4  -2  447.10   10.81   0
   6   4   2  470.24   10.41   0
   6  -4   2  498.43   13.26   0
  -6  -4  -2  533.49   12.77   0
  -6   4  -2  436.80   10.57   0
   6   4   2  538.43   11.48   0
   8   4   2 1512.46   14.17   0
   8  -4   2 1602.69   17.55   0
  -8  -4  -2 1929.71   16.00   0
  -8   4  -2 1926.62   17.09   0
   8   4   2 1857.35   15.87   0
  -8  -4  -2 1536.25   14.62   0
 -10  -4  -2  808.38   11.88   0
  10   4   2  687.36   11.12   0
 -10   4  -2  842.86   11.82   0
  10  -4   2  714.12   11.66   0
 -10  -4  -2  661.21   11.28   0
  10   4   2  816.17   11.76   0
 -10   4  -2  728.05   11.73   0
 -12  -4  -2 1392.42   13.44   0
  12  -4   2 1489.64   15.50   0
 -12   4  -2 1888.14   16.26   0
 -12  -4  -2 1720.38   14.39   0
 -12   4  -2 1602.10   15.81   0
  12   4   2 1411.37   14.93   0
  12   4   2 1701.59   15.59   0
 -14  -4  -2  145.89    9.41   0
  14  -4   2  148.30    9.25   0
 -14   4  -2  154.06    9.10   0
  14   4   2  140.51    9.50   0
 -14  -4  -2  167.56   11.59   0
 -14   4  -2  169.46    9.30   0
  14   4   2  169.01    9.47   0
 -16   4  -2  316.49   10.03   0
  16   4   2  346.55   10.21   0
 -16  -4  -2  358.12   10.51   0
 -16  -4  -2  284.54   10.04   0
  16   4   2  282.23   10.14   0
 -16   4  -2  339.47   12.05   0
  16  -4   2  293.85   11.97   0
 -18  -4  -2   48.80    9.76   0
  18   4   2   53.13    9.53   0
 -18   4  -2   60.58   11.59   0
 -18   4  -2   76.07    9.93   0
  18  -4   2   59.67   11.67   0
  18   4   2   61.94    9.81   0
 -18  -4  -2   72.36    9.89   0
 -20  -4  -2   72.81   10.97   0
  20  -4   2   47.22   12.52   0
 -20  -4  -2   57.00   10.08   0
  20   4   2   71.81   10.10   0
 -20   4  -2   55.23   12.35   0
  20   4   2   61.65   12.55   0
 -20   4  -2   73.72   10.34   0
  22   4   2   56.79   10.83   0
 -22   4  -2   63.04   10.75   0
  22  -4   2   64.87   11.07   0
 -22  -4  -2   75.97   11.29   0
 -22  -4  -2   62.26   13.75   0
 -22   4  -2   76.01   14.03   0
  22   4   2   64.98   13.13   0
  24  -4   2   37.31   11.98   0
  24   4   2   22.05   11.75   0
 -24  -4  -2   16.03   14.52   0
 -24  -4  -2   34.10   12.32   0
 -24   4  -2   25.47   14.33   0
  24   4   2   36.42   14.18   0
 -24   4  -2   41.93   12.52   0
  23  -5  -2   73.43   13.82   0
 -23   5   2   89.10   15.62   0
  23   5  -2   69.29   11.02   0
 -23  -5   2   79.57   11.55   0
 -23  -5   2   87.74   12.17   0
  23   5  -2   71.26   11.62   0
  21   5  -2   96.62   13.19   0
  21   5  -2   97.25   10.51   0
 -21  -5   2   88.01   10.81   0
 -21  -5   2  113.82   13.88   0
 -21   5   2  142.93   16.58   0
  21  -5  -2  102.50   12.61   0
  19  -5  -2  476.60   11.06   0
 -19   5   2  539.97   17.20   0
 -19  -5   2  464.59   11.31   0
  19   5  -2  436.24   10.99   0
  19   5  -2  485.21   11.63   0
 -19  -5   2  517.90   11.92   0
  17   5  -2  192.82   10.28   0
 -17  -5   2  166.91   10.02   0
  17  -5  -2  185.25    9.71   0
  17   5  -2  165.42    9.90   0
 -17   5   2  157.26   12.07   0
 -17   5   2  203.90   13.02   0
 -17  -5   2  183.90   10.52   0
  15   5  -2  718.86   11.88   0
  15   5  -2  553.41   10.48   0
  15  -5  -2  600.85   12.48   0
 -15   5   2  514.37   14.82   0
 -15  -5   2  625.80   11.67   0
 -15  -5   2  599.51   11.01   0
 -15   5   2  664.43   16.09   0
 -13  -5   2  351.36   11.65   0
 -13   5   2  418.54   13.32   0
  13   5  -2  428.76   10.76   0
 -13   5   2  317.75   13.79   0
 -13  -5   2  419.95   10.82   0
  13   5  -2  350.55    9.71   0
  13  -5  -2  375.89    9.80   0
 -11   5   2  378.55   13.96   0
 -11  -5   2  411.62   12.86   0
  11   5  -2  461.48   10.93   0
  11  -5  -2  451.00   10.22   0
 -11   5   2  473.69   14.70   0
 -11  -5   2  386.31   10.02   0
  11   5  -2  382.63    9.96   0
   9   5  -2  620.47   11.06   0
  -9   5   2  608.62   15.86   0
  -9   5   2  777.85   16.84   0
   9   5  -2  744.19   12.38   0
  -9  -5   2  684.57   12.06   0
  -9  -5   2  648.25   13.01   0
   9  -5  -2  696.52   11.35   0
  -7  -5   2  182.16    9.24   0
   7   5  -2  200.87    9.82   0
   7   5  -2  184.84   10.78   0
  -7  -5   2  198.60    9.69   0
  -7   5   2  202.21   13.18   0
  -5   5   2  798.98   16.73   0
   5  -5  -2  762.80   16.78   0
  -5  -5   2  733.41   14.15   0
   5   5  -2  681.22   13.69   0
   5   5  -2  845.94   12.62   0
  -5  -5   2  727.35   12.36   0
  -3  -5   2  159.12    9.31   0
   3  -5  -2  160.09   11.32   0
  -3   5   2  176.52   12.02   0
   3   5  -2  150.05    9.33   0
  -3  -5   2  134.01    9.58   0
   3   5  -2  164.95    9.49   0
   1  -5  -2 1089.59   17.12   0
  -1  -5   2  946.90   16.89   0
  -1   5   2 1089.36   16.31   0
   1   5  -2  983.15   13.63   0
  -1  -5   2 1089.54   13.44   0
   1  -5   2  378.52   15.03   0
   1  -5   2  369.07   10.64   0
  -1   5  -2  381.57   12.17   0
  -1  -5  -2  434.64   11.82   0
   1   5   2  448.15   12.26   0
   3   5   2 1592.87   16.89   0
   3  -5   2 1415.67   15.04   0
  -3   5  -2 1454.49   14.71   0
  -3  -5  -2 1657.97   16.55   0
  -3  -5  -2 1313.33   14.40   0
  -5  -5  -2  161.26    9.12   0
   5  -5   2  208.61   11.71   0
   5   5   2  172.02    9.04   0
   5   5   2  207.18    9.93   0
  -5   5  -2  171.76   10.82   0
  -5  -5  -2  218.10    9.93   0
  -7  -5  -2  691.50   11.38   0
  -7  -5  -2  843.40   12.41   0
   7   5   2  779.84   13.94   0
   7  -5   2  776.93   14.51   0
   7   5   2  657.48   11.28   0
  -7   5  -2  661.55   12.59   0
   9  -5   2    7.29    9.83   0
  -9  -5  -2    8.16    8.54   0
   9   5   2   10.28    8.64   0
  -9   5  -2    3.42   10.01   0
  -9   5  -2    9.34    9.73   0
  -9  -5  -2    2.25   10.66   0
   9   5   2    6.56   10.22   0
 -11  -5  -2  389.13   10.10   0
 -11   5  -2  373.98   11.51   0
 -11  -5  -2  493.54   10.58   0
  11   5   2  409.21   10.03   0
  11  -5   2  446.95   12.03   0
  11   5   2  481.78   10.46   0
 -11   5  -2  514.79   10.57   0
  13  -5   2   22.26    8.49   0
 -13  -5  -2   16.57    8.95   0
  13   5   2   23.03    8.86   0
  13   5   2   17.17    8.88   0
 -13   5  -2   22.03    8.52   0
 -13  -5  -2   15.77    8.99   0
  15  -5   2  181.38    9.45   0
  15   5   2  186.99    9.69   0
 -15  -5  -2  179.72    9.63   0
 -15   5  -2  213.67   11.52   0
  15   5   2  203.77    9.86   0
 -15  -5  -2  209.01   10.09   0
 -17   5  -2  237.91   12.04   0
  17  -5   2  204.21    9.88   0
  17   5   2  192.79   11.95   0
 -17  -5  -2  244.44   10.49   0
  17   5   2  239.04   12.39   0
 -17  -5  -2  192.72   12.18   0
 -19  -5  -2   50.70   10.00   0
  19  -5   2   41.87   12.51   0
 -19  -5  -2   53.05   12.88   0
 -19   5  -2   50.83   10.10   0
  19   5   2   39.24    9.94   0
  19   5   2   51.98   10.18   0
  21   5   2  101.73   13.07   0
 -21   5  -2  102.37   11.43   0
 -21  -5  -2   98.22   11.17   0
  21  -5   2   83.21   13.67   0
 -21  -5  -2   88.49   10.86   0
  21   5   2   89.67   10.70   0
 -23  -5  -2   76.03   14.18   0
  23  -5   2   76.46   14.50   0
  23   5   2   66.95   11.33   0
 -23   5  -2   88.32   11.97   0
 -23  -5  -2   72.68   14.93   0
  23   5   2   92.09   11.52   0
 -22  -6   2   -6.00   10.85   0
 -22   6   2   -7.55   13.48   0
 -22   6   2    2.54   14.96   0
  22  -6  -2    2.89   13.57   0
  22   6  -2    0.17   10.70   0
  22   6  -2    7.29   10.67   0
 -22  -6   2    9.77   11.42   0
 -20  -6   2   75.89   10.53   0
  20   6  -2   73.02   12.98   0
 -20   6   2   57.15   12.47   0
  20  -6  -2   53.58   10.34   0
  20   6  -2   56.71   10.26   0
 -20  -6   2   60.40   10.82   0
 -20   6   2   85.19   15.90   0
  18   6  -2    6.77   11.66   0
  18  -6  -2   23.32   11.42   0
 -18   6   2   12.26   14.26   0
 -18   6   2    9.78   13.72   0
 -18  -6   2   -2.98    9.82   0
  18   6  -2    6.74   12.06   0
 -18  -6   2    5.44   10.01   0
  16  -6  -2  165.55   11.37   0
  16   6  -2  190.87   12.18   0
 -16   6   2  150.67   11.93   0
 -16  -6   2  151.60   10.05   0
 -16  -6   2  172.24   10.14   0
 -16   6   2  185.42   14.25   0
  16   6  -2  160.14    9.89   0
  14  -6  -2   34.37    8.80   0
  14   6  -2   23.54    9.41   0
  14   6  -2   27.83    8.83   0
 -14   6   2   28.29   11.04   0
 -14  -6   2   36.14   11.41   0
 -14  -6   2   22.20    9.04   0
 -14   6   2   22.67   12.39   0
  12  -6  -2  139.92   10.89   0
  12   6  -2  141.90    8.98   0
  12   6  -2  148.43    9.64   0
 -12   6   2  124.62   12.69   0
 -12  -6   2  121.87   10.99   0
 -12   6   2  160.01   13.10   0
 -12  -6   2  148.53    9.64   0
  10   6  -2   10.41    8.73   0
 -10   6   2    3.05   11.65   0
  10  -6  -2   -2.25    8.36   0
 -10   6   2    1.87   10.01   0
 -10  -6   2    3.41    8.87   0
 -10  -6   2    6.95    8.36   0
  10   6  -2   -1.38    8.19   0
   8   6  -2   63.10    8.91   0
  -8   6   2   64.49   12.12   0
  -8  -6   2   54.53    8.53   0
   8   6  -2   55.13   10.11   0
  -8  -6   2   69.40    8.85   0
   6  -6  -2    8.70   11.36   0
   6   6  -2    6.54    7.87   0
  -6  -6   2   10.84    8.67   0
   6   6  -2    4.26    8.66   0
  -6  -6   2    3.34   10.07   0
  -6   6   2   10.79   10.24   0
  -4  -6   2   49.18   10.20   0
  -4  -6   2   55.23    8.67   0
  -4   6   2   53.22   12.48   0
   4  -6  -2   54.36   10.39   0
   4   6  -2   62.01    8.76   0
   4   6  -2   50.90    8.10   0
  -2  -6   2    5.61   10.02   0
   2  -6  -2    4.60    9.96   0
  -2   6   2    5.96   10.46   0
  -2  -6   2    8.98    8.24   0
   2   6  -2    5.36    8.27   0
   0   6  -2  247.48    9.68   0
   0  -6  -2  259.76   11.86   0
   0   6   2  263.04   10.54   0
   0  -6   2  213.16   11.80   0
   0  -6   2  234.20    9.52   0
   2   6   2   19.16   10.56   0
   2  -6   2   16.26    8.30   0
  -2   6  -2   20.94    8.22   0
  -2  -6  -2   14.60    8.38   0
  -2  -6  -2   24.21    8.45   0
   4   6   2  561.77   13.41   0
  -4  -6  -2  497.75   10.79   0
   4  -6   2  516.71   10.62   0
  -4   6  -2  492.45   10.54   0
  -4  -6  -2  563.85   11.63   0
  -6  -6  -2   79.39   10.86   0
  -6   6  -2   57.62    8.25   0
   6   6   2   59.32    9.00   0
   6   6   2   49.09    8.39   0
   6  -6   2   60.32   12.03   0
  -6  -6  -2   49.54    8.72   0
   8  -6   2  475.19   12.81   0
  -8  -6  -2  467.08   10.41   0
  -8  -6  -2  545.89   10.99   0
   8   6   2  537.09   11.05   0
   8   6   2  468.76   10.51   0
  -8   6  -2  467.84   10.20   0
 -10  -6  -2   34.00    8.75   0
  10  -6   2   27.65   10.13   0
  10   6   2   29.34    8.53   0
 -10  -6  -2   22.80    8.67   0
 -10   6  -2   36.15    8.40   0
 -10   6  -2   27.88   10.19   0
  10   6   2   37.01    8.73   0
 -12   6  -2  232.83    9.50   0
  12   6   2  179.46    9.61   0
 -12  -6  -2  219.46   11.87   0
 -12  -6  -2  196.71   11.54   0
 -12   6  -2  177.75    9.17   0
  12   6   2  220.28    9.84   0
  12  -6   2  182.45   11.13   0
 -14   6  -2   52.43   10.87   0
 -14  -6  -2   71.13    9.46   0
  14  -6   2   72.85   10.88   0
  14   6   2   64.23    9.43   0
 -14  -6  -2   72.13    9.39   0
 -14   6  -2   81.96   11.07   0
  14   6   2   89.23   11.41   0
 -16  -6  -2   37.85    9.55   0
  16   6   2   41.23    9.45   0
 -16   6  -2   36.84    9.18   0
 -16  -6  -2   39.98   10.06   0
  16   6   2   42.44    9.75   0
 -16   6  -2   29.46    9.10   0
  16  -6   2   34.12    9.42   0
  18  -6   2   91.60    9.87   0
 -18  -6  -2   94.33   12.51   0
  18   6   2   88.03   10.05   0
  18   6   2  105.82   12.70   0
 -18  -6  -2  103.14   12.77   0
 -18   6  -2  109.19   10.18   0
 -18   6  -2   75.99    9.85   0
 -20  -6  -2   15.90   10.75   0
  20   6   2   31.25   10.62   0
 -20  -6  -2   17.47   13.33   0
 -20   6  -2   24.47   12.89   0
  20  -6   2   29.98   13.23   0
  20   6   2   14.45   10.53   0
 -20   6  -2   18.75   10.35   0
 -22   6  -2    5.73   11.55   0
 -22  -6  -2    9.69   11.52   0
  22  -6   2   14.39   11.46   0
  22   6   2    2.41   11.14   0
 -22   6  -2   14.34   13.51   0
 -22  -6  -2    2.60   11.29   0
  22   6   2   15.86   11.17   0
 -23   7   2   20.39   15.67   0
  23  -7  -2   26.19   11.71   0
  23   7  -2   11.29   11.63   0
 -23  -7   2   14.44   12.36   0
 -23  -7   2   12.64   11.71   0
 -23   7   2   20.39   16.67   0
  23   7  -2   15.87   11.96   0
  21   7  -2  102.39   11.41   0
  21   7  -2  104.62   10.98   0
 -21   7   2  123.37   14.66   0
 -21  -7   2   99.24   14.17   0
 -21  -7   2   81.58   10.87   0
  21  -7  -2  106.69   13.13   0
 -21   7   2   81.28   13.52   0
  19  -7  -2  188.98   10.71   0
  19   7  -2  171.45   10.29   0
 -19  -7   2  177.85   13.40   0
 -19  -7   2  179.64   10.58   0
 -19   7   2  225.19   16.56   0
 -19   7   2  165.91   13.29   0
  19   7  -2  204.08   11.23   0
  17   7  -2   75.06    9.49   0
 -17  -7   2   72.27    9.73   0
 -17   7   2   89.18   12.65   0
 -17  -7   2   63.83   10.43   0
 -17   7   2   61.18   13.89   0
  17  -7  -2   69.58    9.72   0
  17   7  -2   78.35   10.09   0
  15  -7  -2   86.84    9.23   0
 -15  -7   2   85.26    9.46   0
  15   7  -2  111.26    9.95   0
 -15   7   2   85.05   11.74   0
  15   7  -2   91.87    9.50   0
 -15  -7   2  100.13    9.96   0
 -15   7   2  100.94   13.76   0
  13   7  -2   10.50    9.58   0
 -13   7   2    7.10   10.53   0
 -13  -7   2    5.99    9.59   0
 -13   7   2    5.65   12.75   0
  13   7  -2    0.59    8.54   0
 -13  -7   2    7.61    8.94   0
  13  -7  -2    2.78    8.87   0
  11   7  -2    5.94    8.48   0
 -11   7   2    1.25   10.56   0
  11   7  -2    8.28    9.31   0
 -11   7   2    5.12   12.25   0
  11  -7  -2    7.57    8.22   0
 -11  -7   2   -0.37    9.30   0
 -11  -7   2    4.02   10.52   0
  -9  -7   2   90.21    9.21   0
  -9   7   2   81.39   10.91   0
   9   7  -2   86.82   11.32   0
  -9  -7   2   69.58   10.70   0
   9   7  -2   78.27   10.44   0
  -7  -7   2    0.11    8.17   0
  -7   7   2   -0.95   10.54   0
   7   7  -2    7.75    9.88   0
   7   7  -2    7.18   10.69   0
  -7  -7   2    6.04    8.66   0
   7  -7  -2    4.14    9.89   0
  -5  -7   2  187.00   10.80   0
  -5  -7   2  210.83   11.67   0
   5  -7  -2  211.91   11.59   0
  -5   7   2  229.72   12.10   0
   5   7  -2  216.39    9.70   0
   5   7  -2  206.90    8.96   0
   3   7  -2    7.43    8.60   0
   3  -7  -2   18.15   10.32   0
  -3  -7   2   18.26   10.27   0
  -3  -7   2   25.18    8.53   0
  -3   7   2   18.66    8.85   0
   1   7  -2  270.60    9.66   0
  -1  -7   2  285.13    9.73   0
   1  -7  -2  308.51   11.81   0
  -1   7   2  286.36   10.36   0
  -1  -7   2  248.92   12.13   0
  -1   7  -2   19.17   10.35   0
   1  -7   2    6.97    8.27   0
   1   7   2   19.19    8.68   0
  -1  -7  -2   18.17   10.33   0
   1  -7   2   14.56   10.34   0
  -1  -7  -2   14.63    8.48   0
   3   7   2  746.88   12.62   0
  -3   7  -2  642.28   12.73   0
  -3  -7  -2  585.49   11.01   0
   3  -7   2  634.16   11.33   0
  -3  -7  -2  731.06   11.97   0
   5  -7   2   13.04    9.90   0
   5   7   2   11.10    8.99   0
  -5  -7  -2    2.58    8.20   0
  -5   7  -2   12.70    9.95   0
  -5  -7  -2    9.37    8.81   0
   7   7   2  706.70   11.25   0
   7  -7   2  779.16   14.30   0
  -7  -7  -2  897.16   12.33   0
   7   7   2  864.46   14.04   0
  -7  -7  -2  673.97   11.21   0
  -7   7  -2  720.67   11.24   0
   9  -7   2   15.70   10.18   0
  -9  -7  -2   12.05    8.67   0
   9   7   2   18.10    8.49   0
  -9  -7  -2   16.54    8.98   0
  -9   7  -2   12.60    8.21   0
   9   7   2    8.36    9.29   0
 -11  -7  -2  301.64   11.98   0
 -11  -7  -2  367.70   10.43   0
 -11   7  -2  372.89   11.81   0
  11   7   2  365.02   10.33   0
 -11   7  -2  301.24    9.59   0
  11  -7   2  315.80   12.02   0
  11   7   2  305.73    9.97   0
 -13  -7  -2    4.73    9.21   0
  13  -7   2   13.07    8.89   0
 -13   7  -2    9.88    8.80   0
 -13   7  -2   11.63    8.90   0
  13   7   2    4.35    9.21   0
 -13  -7  -2   22.40   11.51   0
  13   7   2    8.20    9.31   0
  15   7   2   49.99    9.78   0
  15   7   2   43.01   11.83   0
 -15   7  -2   52.44   11.42   0
  15  -7   2   43.71    9.43   0
 -15  -7  -2   48.96    9.89   0
 -15   7  -2   36.27    9.29   0
 -15  -7  -2   47.66   11.79   0
 -17   7  -2    5.80   11.54   0
  17   7   2   -8.22    9.96   0
 -17   7  -2    3.75    9.67   0
  17   7   2   -1.70   10.07   0
 -17  -7  -2   -1.33   10.24   0
  17  -7   2  -11.06   12.01   0
 -17  -7  -2   -0.24   10.00   0
  19  -7   2   15.66   12.62   0
 -19  -7  -2   11.86   10.70   0
 -19   7  -2    8.76   10.57   0
  19   7   2   14.27   10.26   0
 -19  -7  -2   17.06   10.64   0
  19   7   2    7.39   10.58   0
 -19   7  -2    7.93   12.62   0
 -21  -7  -2    8.46   11.26   0
 -21   7  -2   18.29   13.49   0
  21   7   2   14.84   13.53   0
  21  -7   2   -1.52   13.97   0
 -21  -7  -2    7.89   11.50   0
  21   7   2    5.61   11.08   0
 -21   7  -2   -0.44   13.11   0
  22  -8  -2    1.64   11.32   0
 -22  -8   2   -0.04   12.15   0
  22   8  -2   11.79   11.35   0
 -22   8   2    6.07   16.19   0
 -22   8   2   10.21   17.52   0
 -22  -8   2    5.35   11.50   0
  22   8  -2    6.90   11.58   0
 -20  -8   2  293.78   13.81   0
 -20   8   2  341.94   17.26   0
  20   8  -2  301.99   14.58   0
  20  -8  -2  319.51   13.99   0
 -20   8   2  263.44   16.37   0
  20   8  -2  296.99   14.05   0
 -20  -8   2  343.57   12.25   0
 -18  -8   2  101.26   10.85   0
  18   8  -2  132.00   11.22   0
 -18   8   2  114.48   14.78   0
 -18   8   2  139.62   15.25   0
  18   8  -2  108.00   10.39   0
  18  -8  -2  135.87   12.35   0
 -18  -8   2  121.44   11.15   0
 -16   8   2  550.85   16.29   0
  16  -8  -2  663.99   11.84   0
  16   8  -2  605.64   11.32   0
 -16   8   2  719.03   17.11   0
  16   8  -2  743.59   12.37   0
 -16  -8   2  585.09   13.41   0
 -16  -8   2  631.43   12.13   0
 -14   8   2   33.82   13.26   0
 -14   8   2   44.03   13.32   0
  14  -8  -2   35.94    9.38   0
  14   8  -2   33.86   11.94   0
 -14  -8   2   35.41    9.46   0
  14   8  -2   32.89    9.25   0
 -14  -8   2   38.42    9.60   0
  12   8  -2  565.47   10.98   0
 -12   8   2  581.22   14.24   0
  12   8  -2  692.29   11.85   0
 -12   8   2  708.14   16.11   0
 -12  -8   2  539.10   12.45   0
  12  -8  -2  601.58   12.71   0
 -12  -8   2  637.71   11.87   0
  10   8  -2   25.61    8.68   0
 -10  -8   2   34.10    9.36   0
 -10   8   2   23.18   12.48   0
 -10  -8   2   23.28    8.71   0
  10  -8  -2   13.63    8.47   0
  10   8  -2   31.73    9.44   0
  -8  -8   2  364.69   12.28   0
   8   8  -2  378.75   11.83   0
   8   8  -2  440.13   10.74   0
  -8  -8   2  412.39   10.44   0
  -8   8   2  407.70   13.21   0
   6   8  -2   77.16    8.48   0
  -6  -8   2   88.93    9.13   0
   6   8  -2   88.00    9.27   0
  -6  -8   2   76.47    8.73   0
  -6   8   2   87.52   11.20   0
   6  -8  -2   84.65   10.68   0
   4   8  -2 1359.13   13.75   0
   4  -8  -2 1290.59   16.28   0
  -4   8   2 1344.81   17.30   0
  -4  -8   2 1207.94   15.48   0
  -4  -8   2 1251.10   14.89   0
  -2  -8   2  577.93   12.00   0
   2   8  -2  693.90   11.52   0
   2  -8  -2  683.37   12.11   0
  -2   8   2  682.70   13.91   0
  -2  -8   2  702.64   11.40   0
   0  -8   2 2234.20   16.30   0
   0   8  -2 2343.41   16.47   0
   0  -8  -2 2366.38   17.70   0
   0  -8   2 2104.30   19.84   0
   0   8   2 2391.76   18.28   0
  -2   8  -2  281.67   11.68   0
  -2  -8  -2  250.44    9.59   0
  -2  -8  -2  305.32    9.87   0
   2   8   2  326.96   10.43   0
   2  -8   2  293.61    9.90   0
   4   8   2 1261.45   15.31   0
   4  -8   2 1100.83   12.68   0
  -4  -8  -2 1212.18   13.56   0
  -4   8  -2 1102.31   12.77   0
  -4  -8  -2 1027.49   12.51   0
  -6  -8  -2  168.11   11.49   0
   6   8   2  166.82    9.72   0
  -6  -8  -2  137.34    9.02   0
  -6   8  -2  146.23    8.95   0
   8  -8   2  817.67   14.25   0
   8   8   2  734.02   11.56   0
   8   8   2  926.45   12.68   0
  -8  -8  -2  880.47   13.94   0
  -8   8  -2  795.63   13.05   0
  -8  -8  -2  748.03   11.67   0
  10   8   2  195.15    9.75   0
 -10   8  -2  197.78    9.31   0
  10   8   2  229.73   10.30   0
 -10  -8  -2  197.17    9.88   0
 -10  -8  -2  238.53   10.20   0
  10  -8   2  204.73   11.71   0
  12   8   2  664.96   11.75   0
 -12   8  -2  731.98   11.79   0
 -12  -8  -2  637.95   11.64   0
  12  -8   2  587.58   13.23   0
  12   8   2  559.44   10.99   0
 -12  -8  -2  574.80   11.16   0
 -12   8  -2  529.62   12.45   0
  14   8   2  152.65   10.11   0
 -14   8  -2  155.49   11.73   0
  14  -8   2  139.09   11.82   0
 -14  -8  -2  126.93   10.15   0
  14   8   2  124.72   10.13   0
 -14   8  -2  115.22   11.39   0
 -14  -8  -2  144.24   10.26   0
  16  -8   2  160.35   10.29   0
 -16   8  -2  137.31   12.11   0
 -16  -8  -2  143.07   10.49   0
  16   8   2  190.70   10.91   0
  16   8   2  152.57   10.66   0
 -16  -8  -2  165.59   10.89   0
 -16   8  -2  187.57   12.49   0
 -18  -8  -2   97.57   10.75   0
  18  -8   2   88.43   13.10   0
 -18   8  -2   72.85   12.83   0
 -18  -8  -2  104.68   11.00   0
  18   8   2   92.86   10.98   0
 -18   8  -2  104.44   13.07   0
  18   8   2   79.81   10.64   0
 -20   8  -2   70.74   13.81   0
 -20  -8  -2   64.21   11.64   0
 -20  -8  -2   53.71   11.37   0
 -20   8  -2   68.84   13.82   0
  20   8   2   74.79   11.33   0
  20   8   2   73.41   11.35   0
  20  -8   2   63.36   14.09   0
 -21  -9   2   83.61   12.00   0
  21   9  -2   91.42   11.98   0
 -21   9   2   98.68   15.43   0
 -21   9   2   78.23   16.81   0
 -21  -9   2   76.52   15.21   0
  21  -9  -2   87.27   11.60   0
  21   9  -2   80.72   11.56   0
 -19   9   2   79.65   15.92   0
 -19  -9   2   72.87   11.06   0
  19   9  -2   68.42   10.77   0
 -19   9   2   69.24   15.58   0
 -19  -9   2   51.22   14.60   0
  19   9  -2   87.51   11.52   0
  19  -9  -2   84.87   10.88   0
 -17   9   2  135.36   15.25   0
  17   9  -2  135.53   11.53   0
 -17   9   2  104.39   13.20   0
 -17  -9   2  130.09   11.22   0
  17   9  -2  125.14   10.58   0
 -17  -9   2  123.07   10.69   0
  17  -9  -2  122.55   10.60   0
  15   9  -2   31.01   10.08   0
  15   9  -2   18.22    9.55   0
 -15  -9   2   23.12    9.74   0
 -15   9   2   16.89   13.67   0
 -15  -9   2   20.80   10.35   0
 -15   9   2   10.16   13.81   0
  15  -9  -2   15.92   11.84   0
 -13   9   2   96.75   12.15   0
  13   9  -2   82.26    9.69   0
  13  -9  -2   88.57    9.27   0
 -13   9   2   80.30   12.20   0
 -13  -9   2   75.81    9.40   0
  13   9  -2  111.03   10.37   0
 -13  -9   2   79.92   10.33   0
 -11  -9   2  252.56   10.54   0
 -11   9   2  237.18   12.80   0
  11   9  -2  208.36    9.79   0
 -11  -9   2  230.72   11.99   0
  11   9  -2  241.35   12.59   0
  11  -9  -2  241.57    9.98   0
  -9  -9   2  184.88    9.89   0
  -9  -9   2  191.89   11.73   0
   9   9  -2  217.61   10.23   0
   9   9  -2  173.88   11.35   0
  -9   9   2  199.73   12.19   0
  -7  -9   2 1291.09   15.55   0
   7  -9  -2 1378.39   16.82   0
  -7  -9   2 1416.97   13.61   0
   7   9  -2 1506.77   14.28   0
   7   9  -2 1363.41   13.95   0
  -7   9   2 1490.29   17.95   0
   5  -9  -2  372.66   12.14   0
   5   9  -2  383.42   10.37   0
  -5  -9   2  374.67   12.02   0
  -5  -9   2  311.56   10.18   0
  -5   9   2  374.56   10.98   0
   3  -9  -2  951.08   14.32   0
  -3  -9   2  838.75   12.78   0
  -3   9   2 1022.22   15.43   0
  -3  -9   2  979.91   12.36   0
   3   9  -2 1007.28   12.44   0
  -1   9   2  599.30   11.70   0
   1   9  -2  559.28   10.90   0
  -1  -9   2  494.63   12.82   0
   1  -9  -2  567.37   12.66   0
  -1  -9   2  527.91   10.72   0
   1  -9   2   99.17    8.88   0
  -1   9  -2  111.58    8.93   0
  -1  -9  -2  111.86   11.29   0
   1  -9   2   95.22   10.88   0
  -1  -9  -2   98.72    8.84   0
   1   9   2  105.70    9.58   0
  -3  -9  -2  519.48   10.96   0
  -3  -9  -2  459.64   10.39   0
   3  -9   2  488.73   10.39   0
   3   9   2  536.09   11.30   0
  -3   9  -2  494.74   10.47   0
  -5   9  -2  206.14    9.32   0
  -5  -9  -2  202.66    9.39   0
   5  -9   2  194.15    9.23   0
  -5  -9  -2  202.19    9.97   0
   5   9   2  237.20    9.92   0
  -7  -9  -2  151.18    9.17   0
   7   9   2  188.34   10.29   0
  -7   9  -2  150.19    9.07   0
  -7  -9  -2  168.48   10.04   0
   7  -9   2  158.61   11.41   0
  -9   9  -2  291.49   11.67   0
   9   9   2  348.71   12.87   0
   9  -9   2  337.99   12.47   0
  -9  -9  -2  371.56   12.66   0
  -9  -9  -2  300.10   10.16   0
  11   9   2   53.73   11.53   0
  11   9   2   58.68   12.08   0
 -11   9  -2   45.61   11.05   0
 -11  -9  -2   65.03    9.68   0
 -11  -9  -2   43.93    9.57   0
  11  -9   2   53.12   11.19   0
 -13  -9  -2   65.87    9.94   0
 -13   9  -2   63.26   11.56   0
  13   9   2   72.46    9.77   0
 -13   9  -2   97.02   11.72   0
  13   9   2   83.61   12.41   0
 -13  -9  -2   83.41   10.11   0
  13  -9   2   84.50   11.77   0
 -15  -9  -2   98.06   10.63   0
  15   9   2  115.92   10.76   0
  15   9   2  108.36   12.71   0
 -15   9  -2   99.20    9.91   0
 -15  -9  -2  112.40   10.53   0
  15  -9   2  111.35   10.24   0
 -15   9  -2  137.35   12.26   0
  17  -9   2    2.28   12.61   0
 -17   9  -2    4.02   12.64   0
  17   9   2    9.60   10.60   0
 -17  -9  -2   -0.53   10.83   0
 -17  -9  -2    6.81   12.97   0
 -17   9  -2   15.62   12.76   0
  17   9   2    0.64   10.64   0
 -19  -9  -2  148.89   11.62   0
  19   9   2  155.38   11.60   0
 -19  -9  -2  162.70   11.84   0
 -19   9  -2  139.00   13.81   0
 -19   9  -2  189.61   11.85   0
  19  -9   2  143.78   14.20   0
  19   9   2  172.79   11.72   0
 -21  -9  -2   30.66   11.98   0
  21   9   2   18.43   11.87   0
 -21   9  -2    9.00   11.91   0
 -20 -10   2    0.65   11.96   0
 -20  10   2   -0.29   16.72   0
  20  10  -2   11.60   11.31   0
  20 -10  -2    5.39   14.02   0
 -20 -10   2   13.59   11.62   0
 -20  10   2   -2.24   16.56   0
  20  10  -2    0.85   12.05   0
 -18 -10   2   28.01   11.18   0
 -18 -10   2   19.67   10.96   0
  18  10  -2   21.08   11.24   0
 -18  10   2   25.40   15.66   0
 -18  10   2   23.46   15.76   0
  18 -10  -2   23.19   13.27   0
  18  10  -2   25.89   13.10   0
  16 -10  -2   -3.10   10.04   0
 -16 -10   2    8.51   10.73   0
  16  10  -2   14.22   11.12   0
  16  10  -2    6.08   10.24   0
 -16 -10   2    0.49   12.69   0
 -16  10   2    4.43   12.72   0
 -16  10   2    1.87   14.71   0
 -14 -10   2   39.44    9.93   0
  14  10  -2   29.75   12.11   0
 -14  10   2   37.75   14.28   0
  14  10  -2   46.19   10.68   0
  14 -10  -2   47.68    9.95   0
 -14  10   2   49.73   14.03   0
 -14 -10   2   50.63   13.20   0
  12  10  -2   83.65    9.69   0
 -12  10   2   68.42   12.34   0
 -12 -10   2   62.93   12.55   0
  12  10  -2   83.79   10.22   0
  12 -10  -2   74.12   11.58   0
 -12 -10   2   60.92   11.96   0
 -10 -10   2   63.79    9.86   0
  10  10  -2   65.59   12.34   0
  10  10  -2   51.88   11.64   0
 -10 -10   2   61.08   11.82   0
 -10  10   2   62.35   13.57   0
  -8 -10   2  111.65   11.85   0
  -8 -10   2  118.33    9.59   0
   8  10  -2  137.21    9.78   0
  -8  10   2  129.39   11.99   0
   8  10  -2  126.50    9.57   0
   8 -10  -2  116.00   11.55   0
  -6 -10   2  160.34   11.67   0
   6 -10  -2  176.32   11.64   0
  -6 -10   2  176.48    9.92   0
   6  10  -2  166.18   12.00   0
  -6  10   2  182.15   12.12   0
   4  10  -2   16.02    9.17   0
   4 -10  -2   16.25   10.56   0
  -4 -10   2   17.81   10.48   0
  -4 -10   2   12.06    9.19   0
  -4  10   2    9.22    8.91   0
  -2 -10   2    5.41   10.77   0
   2  10  -2   10.84    8.79   0
  -2 -10   2   13.69   10.57   0
  -2  10   2   16.22    8.86   0
   2 -10  -2   16.02   10.58   0
   0 -10   2  111.62   11.15   0
   0 -10  -2  137.92   11.24   0
   0  10   2  131.32   11.74   0
   0 -10   2  126.12    9.13   0
   0 -10  -2  102.94    8.94   0
   0  10  -2  125.25    9.18   0
  -2 -10  -2   30.70   10.79   0
  -2  10  -2   31.48   10.71   0
  -2 -10  -2   23.82   10.59   0
   2 -10   2   18.06    8.64   0
   2  10   2   39.36    9.29   0
   2 -10   2   23.52   10.71   0
   4 -10   2  537.82   10.71   0
  -4  10  -2  552.29   10.85   0
   4  10   2  613.01   11.54   0
  -4 -10  -2  559.84   11.09   0
  -4 -10  -2  491.13   10.57   0
  -6 -10  -2   14.22    9.40   0
   6  10   2   29.94    9.85   0
  -6 -10  -2   18.74    9.26   0
  -6  10  -2    8.69    8.92   0
   6 -10   2    4.70    8.70   0
   8  10   2  277.66   12.50   0
  -8 -10  -2  215.70   11.58   0
   8 -10   2  239.76   12.26   0
  -8  10  -2  223.43   11.76   0
  -8 -10  -2  238.60   10.39   0
 -10  10  -2   21.96   11.01   0
  10  10   2   21.64   12.38   0
  10 -10   2    7.78   11.34   0
 -10 -10  -2   21.42    9.85   0
 -10 -10  -2   14.10   11.72   0
  12  10   2   34.44   11.84   0
 -12 -10  -2   44.01   10.15   0
  12  10   2   47.77   10.10   0
 -12 -10  -2   28.80    9.88   0
  12 -10   2   48.94   11.87   0
 -12  10  -2   43.74    9.63   0
 -14 -10  -2  160.66   10.88   0
 -14  10  -2  159.36   12.60   0
  14  10   2  153.23   10.80   0
 -14  10  -2  204.84   10.71   0
  14  10   2  187.93   10.92   0
 -14 -10  -2  168.73   13.02   0
  14 -10   2  166.60   12.85   0
 -16  10  -2   20.57   12.70   0
  16 -10   2   26.88   10.74   0
  16  10   2   28.79   11.16   0
  16  10   2   27.27   11.07   0
 -16 -10  -2   34.42   10.87   0
 -16  10  -2   28.31   10.49   0
 -16 -10  -2   34.45   11.13   0
  18  10   2  102.61   11.76   0
 -18 -10  -2   78.14   11.75   0
 -18  10  -2   87.03   11.33   0
 -18 -10  -2   77.87   11.84   0
  18  10   2   66.47   14.07   0
  18 -10   2   86.89   11.33   0
 -18  10  -2   84.19   13.97   0
 -20 -10  -2   33.55   11.99   0
  20  10   2   20.76   12.00   0
 -19 -11   2    5.14   14.62   0
  19 -11  -2    1.37   11.52   0
 -19  11   2   -1.25   14.50   0
 -19  11   2    4.98   16.63   0
  19  11  -2    4.97   11.67   0
  19  11  -2   18.45   12.12   0
 -19 -11   2   17.25   11.84   0
  17 -11  -2   12.30   13.16   0
  17  11  -2    7.36   10.93   0
 -17 -11   2    9.87   13.52   0
  17  11  -2    7.81   11.58   0
 -17  11   2   -0.65   13.74   0
 -17  11   2    4.80   15.63   0
 -17 -11   2    0.55   11.48   0
  15 -11  -2   12.39   10.52   0
 -15 -11   2   24.11   12.77   0
 -15 -11   2   28.97   11.13   0
  15  11  -2   16.86   11.30   0
  15  11  -2   15.63   12.75   0
 -15  11   2   12.99   12.94   0
 -15  11   2   15.09   15.24   0
 -13 -11   2    7.77   12.49   0
  13  11  -2    8.05   10.46   0
  13  11  -2   11.97   10.00   0
  13 -11  -2   -2.15    9.88   0
 -13 -11   2    5.00   10.60   0
 -13  11   2   11.05   12.11   0
 -13  11   2    7.43   14.53   0
  11  11  -2   -0.16    9.81   0
 -11  11   2    0.54   14.14   0
 -11 -11   2    7.22   10.07   0
 -11 -11   2    2.77   10.17   0
  11  11  -2    7.95   10.35   0
  11 -11  -2   10.75    9.48   0
  -9  11   2   17.74   11.99   0
  -9 -11   2   14.94    9.60   0
   9  11  -2   15.66   10.10   0
  -9 -11   2   14.04    9.79   0
  -7 -11   2   41.35    9.55   0
  -7 -11   2   43.94    9.84   0
   7  11  -2   51.48    9.92   0
   7 -11  -2   33.47   11.30   0
  -7  11   2   42.11   11.56   0
  -5 -11   2    4.81    9.30   0
   5  11  -2    4.83    9.53   0
  -5 -11   2    3.85   11.05   0
   5 -11  -2    6.19   10.84   0
  -5  11   2    6.05   11.33   0
   3 -11  -2   31.30    9.02   0
  -3  11   2   37.64    9.55   0
   3  11  -2   43.91   11.52   0
  -3 -11   2   35.23    9.33   0
  -3 -11   2   29.20    9.31   0
  -1 -11   2   74.59   11.22   0
  -1 -11   2   70.83    9.39   0
   1  11  -2   90.98    9.43   0
  -1  11   2   99.78   11.56   0
   1 -11  -2   70.63    9.15   0
   1 -11  -2   74.12    9.28   0
  -1  11  -2   20.26    8.91   0
  -1 -11  -2   28.86    9.11   0
   1 -11   2   17.80    8.96   0
  -1 -11  -2   25.71   11.00   0
   1 -11   2   26.56   10.95   0
   1  11   2   39.08    9.44   0
  -3  11  -2  132.62    9.69   0
   3  11   2  158.80   12.22   0
  -3 -11  -2  124.56    9.45   0
   3 -11   2  133.44   11.55   0
  -3 -11  -2  156.23    9.75   0
   3 -11   2  159.98   11.62   0
  -5  11  -2   11.24    9.01   0
   5  11   2   16.30    9.44   0
  -5 -11  -2   10.47    8.99   0
  -5 -11  -2    6.76   11.51   0
   5 -11   2   20.83    9.01   0
  -7 -11  -2   45.01   10.02   0
  -7 -11  -2   55.41   11.48   0
  -7  11  -2   45.32    9.38   0
   7  11   2   37.23   10.11   0
   9  11   2   15.84   10.19   0
   9 -11   2   12.06   11.44   0
  -9  11  -2   22.84    9.35   0
  -9 -11  -2   10.78    9.68   0
  -9 -11  -2   23.21   10.12   0
 -11  11  -2  129.16   12.16   0
  11 -11   2  125.34   12.67   0
 -11 -11  -2  112.48   10.47   0
  11  11   2  123.13   13.30   0
 -11 -11  -2  147.06   10.72   0
  13 -11   2    1.42   12.45   0
  13  11   2    4.48   10.66   0
 -13 -11  -2   -6.11   10.38   0
 -13 -11  -2   -2.82   12.82   0
 -13  11  -2   -2.89   12.23   0
 -15  11  -2  218.42   13.35   0
 -15 -11  -2  237.14   11.64   0
  15 -11   2  252.14   14.21   0
 -15  11  -2  289.32   13.77   0
  15  11   2  245.56   11.65   0
  15  11   2  308.07   12.00   0
 -15 -11  -2  263.17   14.32   0
  17  11   2   39.73   11.82   0
 -17  11  -2   20.94   13.50   0
  17  11   2   23.49   11.60   0
  17 -11   2   42.03   11.59   0
 -17 -11  -2   38.86   11.54   0
 -17  11  -2   47.91   13.65   0
 -17 -11  -2   37.66   11.88   0
 -18 -12   2    7.23   12.25   0
 -18 -12   2   28.97   14.57   0
 -18  12   2   12.41   17.33   0
  18  12  -2    6.47   12.43   0
  18  12  -2   15.35   11.80   0
  16  12  -2  173.04   12.37   0
 -16  12   2  158.38   17.01   0
 -16 -12   2  179.03   12.31   0
  16  12  -2  144.14   11.65   0
  16 -12  -2  163.97   11.94   0
 -16  12   2  185.06   14.78   0
 -16 -12   2  158.97   11.70   0
 -14  12   2    6.67   13.51   0
  14  12  -2   17.56   11.23   0
 -14 -12   2   10.68   11.14   0
 -14 -12   2   11.80   13.94   0
  14 -12  -2    3.88   10.61   0
  14  12  -2    3.89   10.78   0
 -14  12   2    7.65   13.19   0
  12  12  -2  315.86   11.47   0
  12  12  -2  377.73   12.14   0
  12 -12  -2  338.74   11.72   0
 -12 -12   2  320.59   12.22   0
 -12  12   2  321.10   14.57   0
 -12 -12   2  335.88   13.80   0
 -10 -12   2    3.15   10.37   0
 -10 -12   2   18.28   10.53   0
 -10  12   2   17.57   12.41   0
  10  12  -2   12.82   10.69   0
  -8 -12   2  290.84   11.30   0
   8  12  -2  343.79   11.30   0
  -8 -12   2  303.13   11.12   0
  -8  12   2  301.71   13.71   0
   8 -12  -2  298.59   13.27   0
  -6 -12   2   62.35   12.01   0
   6 -12  -2   63.35    9.65   0
   6  12  -2   74.93   12.24   0
  -6 -12   2   63.72   10.01   0
  -6  12   2   61.77   12.22   0
   4 -12  -2  292.61   10.82   0
  -4 -12   2  259.52   12.75   0
   4  12  -2  300.96   10.84   0
  -4  12   2  288.99   13.35   0
  -4 -12   2  262.05   12.88   0
  -2 -12   2   11.14    9.44   0
  -2  12   2    6.00   11.80   0
  -2 -12   2    6.54    9.62   0
   2  12  -2   14.08    9.68   0
   2 -12  -2   11.35    9.32   0
   0 -12   2  152.94   11.92   0
   0 -12   2  165.02   10.18   0
   0  12   2  180.68   10.42   0
   0 -12  -2  169.98    9.88   0
   0 -12  -2  172.43    9.92   0
   0  12  -2  200.32   10.34   0
  -2 -12  -2   -0.52    9.37   0
   2  12   2    1.83    9.60   0
  -2 -12  -2   22.00   11.35   0
  -2  12  -2    3.73    9.50   0
   2 -12   2    1.34    9.21   0
   2 -12   2    7.80   11.52   0
   4 -12   2  146.32   12.16   0
   4 -12   2  166.47   10.02   0
  -4  12  -2  158.99    9.85   0
  -4 -12  -2  183.77   10.48   0
   4  12   2  190.85   10.36   0
  -4 -12  -2  158.28    9.89   0
   6  12   2   57.56   10.31   0
  -6 -12  -2   65.81   10.14   0
   6 -12   2   60.41    9.57   0
  -6  12  -2   56.19    9.75   0
  -6 -12  -2   58.41    9.79   0
  -8 -12  -2  359.54   11.35   0
  -8 -12  -2  276.48   10.70   0
  -8  12  -2  297.18   10.86   0
   8  12   2  366.44   13.62   0
   8 -12   2  317.37   11.28   0
 -10  12  -2   62.37   12.57   0
  10 -12   2   60.47   12.68   0
 -10 -12  -2   54.26   10.40   0
 -10 -12  -2   63.73   10.74   0
  10  12   2   66.56   10.60   0
 -12 -12  -2  257.88   13.89   0
 -12  12  -2  219.80   13.20   0
  12 -12   2  224.19   14.02   0
 -12 -12  -2  212.80   11.13   0
  12  12   2  262.54   11.67   0
  14 -12   2   42.38   13.78   0
 -14 -12  -2   45.36   11.11   0
 -14  12  -2   35.17   13.33   0
  14  12   2   58.20   11.32   0
 -14  12  -2   38.25   12.95   0
 -14 -12  -2   30.25   11.50   0
 -16  12  -2   63.59   14.30   0
  16 -12   2   70.72   14.53   0
 -16 -12  -2   66.80   11.63   0
 -16  12  -2   60.60   14.11   0
 -16 -12  -2   75.07   14.71   0
  16  12   2   67.53   12.07   0
  15  13  -2   57.70   11.75   0
 -15  13   2   83.57   16.60   0
 -15 -13   2   70.99   12.29   0
 -15  13   2   56.65   15.06   0
 -15 -13   2   82.96   14.56   0
  15  13  -2   76.79   14.89   0
  15 -13  -2   72.85   14.16   0
 -13 -13   2  433.07   12.91   0
  13  13  -2  449.74   13.11   0
  13 -13  -2  422.07   14.89   0
 -13 -13   2  392.56   14.91   0
 -13  13   2  411.66   17.83   0
 -11 -13   2   92.20   11.03   0
  11 -13  -2  115.37   10.90   0
 -11 -13   2  112.55   11.76   0
 -11  13   2  110.09   13.65   0
  11  13  -2  127.80   11.71   0
  -9 -13   2  791.18   13.02   0
  -9 -13   2  749.55   14.98   0
   9  13  -2  845.26   15.22   0
  -9  13   2  805.79   16.50   0
   7  13  -2  178.70   10.94   0
  -7 -13   2  156.60   13.16   0
  -7  13   2  168.84   11.10   0
   7 -13  -2  160.04   12.83   0
  -7 -13   2  156.48   13.24   0
  -5 -13   2  662.70   12.67   0
  -5  13   2  725.98   15.18   0
   5 -13  -2  667.95   14.69   0
  -5 -13   2  657.25   12.48   0
   5  13  -2  780.17   14.57   0
  -3 -13   2  142.76   12.56   0
  -3 -13   2  142.61   10.54   0
  -3  13   2  158.68   13.19   0
   3  13  -2  164.51   10.41   0
   3 -13  -2  150.36   12.56   0
  -1 -13   2  681.21   12.16   0
   1 -13  -2  659.16   14.20   0
  -1 -13   2  633.66   14.43   0
  -1  13   2  748.01   13.05   0
   1 -13  -2  591.95   11.77   0
   1  13  -2  691.29   13.84   0
  -1  13  -2  180.35   10.28   0
   1 -13   2  167.45   10.21   0
   1  13   2  181.47   10.95   0
   1 -13   2  162.09   10.75   0
  -1 -13  -2  173.57   12.71   0
  -1 -13  -2  173.90   10.25   0
  -3 -13  -2  751.26   12.65   0
   3  13   2  828.17   14.93   0
  -3 -13  -2  681.68   12.18   0
   3 -13   2  693.04   14.87   0
   3 -13   2  716.43   14.21   0
  -3  13  -2  786.66   12.47   0
  -5  13  -2  236.64   10.74   0
  -5 -13  -2  215.36   10.60   0
  -5 -13  -2  250.33   11.02   0
   5  13   2  264.83   11.31   0
   5 -13   2  204.38   13.26   0
   5 -13   2  228.23   10.64   0
  -7 -13  -2  496.05   14.26   0
  -7 -13  -2  469.34   13.23   0
  -7  13  -2  522.45   14.11   0
   7  13   2  584.25   12.49   0
  -9 -13  -2   60.51   10.88   0
  -9  13  -2   47.49   10.60   0
   9  13   2   65.21   10.93   0
   9 -13   2   44.52   12.99   0
  -9 -13  -2   54.44   10.53   0
 -11 -13  -2  229.76   11.38   0
  11  13   2  251.73   12.07   0
 -11  13  -2  225.42   13.65   0
 -11 -13  -2  236.14   11.89   0
  11 -13   2  232.41   14.17   0
  13 -13   2    5.04   13.78   0
 -13  13  -2    8.27   11.12   0
  13  13   2   -4.46   11.46   0
 -13 -13  -2    2.70   10.98   0
 -13 -13  -2   13.45   11.49   0
 -15 -13  -2  147.30   12.74   0
 -15 -13  -2  112.07   14.66   0
  15  13   2  130.15   12.45   0
 -15  13  -2  143.29   11.86   0
  15 -13   2  109.89   14.91   0
 -15  13  -2  111.05   14.29   0
  14  14  -2    2.93   12.57   0
 -14 -14   2   -5.89   12.54   0
 -14 -14   2   14.08   11.90   0
 -14  14   2   14.17   14.26   0
  14 -14  -2   23.45   14.39   0
 -14  14   2    3.59   17.45   0
  12  14  -2    5.74   11.89   0
 -12 -14   2   -1.84   11.88   0
 -12 -14   2    3.73   11.62   0
  12 -14  -2    3.02   13.78   0
 -12  14   2    8.33   16.76   0
 -10 -14   2   11.42   11.20   0
 -10 -14   2   32.47   11.44   0
  10  14  -2   17.46   14.11   0
 -10  14   2   10.43   13.97   0
  -8 -14   2   31.88   11.01   0
   8 -14  -2   18.81   13.22   0
   8  14  -2   27.25   11.26   0
  -8  14   2   27.32   13.79   0
  -8 -14   2   28.42   11.24   0
  -6 -14   2    2.69   10.79   0
  -6 -14   2    4.71   13.08   0
   6  14  -2   15.32   10.97   0
  -6  14   2    0.39   10.77   0
   6 -14  -2    3.16   12.52   0
  -4 -14   2  162.35   11.02   0
  -4 -14   2  146.99   11.05   0
  -4  14   2  180.74   13.76   0
   4 -14  -2  149.22   10.99   0
   4  14  -2  158.09   10.90   0
   2 -14  -2   43.26   10.32   0
  -2 -14   2   42.06   10.25   0
  -2 -14   2   34.67   12.64   0
  -2  14   2   49.94   13.45   0
   2 -14  -2   37.95   12.59   0
   2  14  -2   56.90   10.56   0
   0  14   2  167.31   11.43   0
   0 -14  -2  134.37   10.26   0
   0 -14   2  131.90   12.98   0
   0  14  -2  145.10   10.52   0
   0 -14  -2  150.95   11.05   0
   0 -14   2  148.17   10.77   0
   2 -14   2   25.67   12.41   0
  -2  14  -2   27.96   10.19   0
   2  14   2   36.41   13.70   0
  -2 -14  -2   26.64    9.87   0
   2 -14   2   33.99   12.99   0
  -2 -14  -2   19.72   12.84   0
  -4  14  -2   39.29   10.63   0
  -4 -14  -2   32.32   10.40   0
   4  14   2   34.21   10.88   0
  -4 -14  -2   38.83   10.76   0
   4 -14   2   53.47   10.47   0
   4 -14   2   27.66   12.68   0
   6  14   2   10.28   11.02   0
  -6 -14  -2    6.49   10.35   0
  -6 -14  -2   11.91   10.67   0
   6 -14   2    4.90   12.87   0
   6 -14   2   -1.76   10.37   0
  -6  14  -2   10.70   12.85   0
  -8  14  -2    8.95   13.31   0
   8  14   2   11.01   11.47   0
  -8 -14  -2    7.58   10.52   0
   8 -14   2   13.12   13.45   0
  -8 -14  -2    3.36   11.64   0
 -10  14  -2   50.83   13.60   0
  10  14   2   51.10   11.78   0
 -10 -14  -2   45.80   11.32   0
  10 -14   2   50.49   13.97   0
 -10 -14  -2   51.01   11.61   0
 -12 -14  -2   14.30   11.89   0
  12  14   2   25.55   11.91   0
 -12  14  -2    3.45   11.52   0
  12 -14   2    8.38   14.22   0
 -12 -14  -2    8.22   11.63   0
 -11 -15   2   22.87   12.09   0
 -11  15   2   20.97   15.28   0
  11  15  -2   38.65   12.33   0
 -11 -15   2   10.54   12.31   0
  11 -15  -2   31.16   14.16   0
  -9 -15   2   23.30   11.70   0
   9  15  -2   28.38   11.96   0
  -9  15   2   23.15   14.75   0
  -9 -15   2   44.08   11.52   0
   7 -15  -2   24.77   13.63   0
   7  15  -2    2.90   11.20   0
  -7 -15   2    9.32   14.28   0
  -7  15   2    4.72   11.53   0
  -7 -15   2   -8.24   11.29   0
  -5 -15   2   12.00   11.22   0
  -5 -15   2   17.34   13.72   0
   5  15  -2   23.84   13.73   0
  -5  15   2   13.45   13.79   0
   5 -15  -2   14.40   10.85   0
  -3 -15   2   27.69   10.96   0
  -3 -15   2   25.93   13.25   0
   3 -15  -2   21.07   13.16   0
   3  15  -2   42.88   13.42   0
  -3  15   2   29.11   14.10   0
   3 -15  -2   16.84   13.13   0
   1 -15  -2   14.74   11.04   0
  -1 -15   2   11.78   10.67   0
  -1  15   2   13.49   11.47   0
   1 -15  -2   20.60   10.65   0
   1  15  -2   20.13   10.96   0
  -1 -15   2   13.15   10.89   0
   1  15   2   -0.17   11.40   0
   1 -15   2    2.68   13.46   0
   1 -15   2    5.61   10.77   0
  -1 -15  -2   17.68   10.55   0
  -1  15  -2    5.03   10.62   0
  -1 -15  -2   -0.15   13.45   0
   3 -15   2  194.04   11.48   0
   3 -15   2  169.69   13.99   0
   3  15   2  203.83   12.35   0
  -3 -15  -2  173.12   11.20   0
  -3 -15  -2  201.61   11.90   0
  -3  15  -2  197.91   13.88   0
  -5 -15  -2   47.62   10.88   0
   5 -15   2   52.07   11.13   0
   5 -15   2   42.16   13.80   0
  -5 -15  -2   64.36   11.35   0
   5  15   2   56.22   11.62   0
  -5  15  -2   52.34   11.16   0
   7  15   2   61.61   14.36   0
  -7 -15  -2   58.29   11.36   0
  -7 -15  -2   55.01   11.61   0
   7 -15   2   56.34   13.92   0
  -7  15  -2   58.23   11.73   0
  -9  15  -2    2.85   14.19   0
   9  15   2   22.03   11.91   0
  -9 -15  -2   19.20   12.09   0
  -9 -15  -2    3.60   11.63   0
   9 -15   2    8.96   14.44   0
 -11 -15  -2   -9.11   12.02   0
 -11 -15  -2    3.44   12.18   0
  11 -15   2   -1.71   15.15   0
 -11  15  -2   -0.96   11.82   0
  11  15   2   -2.04   11.97   0
   8  16  -2   67.74   15.03   0
   8 -16  -2   31.22   14.80   0
  -8  16   2   31.62   15.47   0
  -8 -16   2   44.59   12.13   0
  -8 -16   2   57.25   15.33   0
  -6 -16   2   30.38   12.06   0
  -6 -16   2   35.02   12.16   0
   6 -16  -2   44.64   14.75   0
   6 -16  -2   27.79   14.26   0
  -6  16   2   21.88   14.88   0
   6  16  -2   40.52   12.04   0
   4 -16  -2  145.41   14.62   0
  -4 -16   2  117.58   14.76   0
  -4  16   2  152.43   15.10   0
   4 -16  -2  102.84   11.97   0
   4  16  -2  165.82   12.11   0
  -4 -16   2  129.45   11.97   0
  -2 -16   2    2.48   13.98   0
   2 -16  -2   14.24   11.25   0
  -2 -16   2   12.53   11.47   0
  -2  16   2    5.40   11.96   0
   2 -16  -2    7.94   14.03   0
   2  16  -2    0.54   11.53   0
   0 -16   2  106.48   14.58   0
   0 -16  -2  109.77   14.14   0
   0 -16  -2  121.43   14.38   0
   0  16  -2  112.32   11.95   0
   0 -16   2  114.42   11.72   0
   0  16   2  142.61   12.32   0
   2 -16   2   18.83   11.78   0
   2 -16   2   19.01   11.50   0
  -2 -16  -2    1.41   11.60   0
   2  16   2   17.65   14.75   0
  -2 -16  -2   12.26   13.72   0
  -2  16  -2    9.07   11.46   0
   4 -16   2   55.39   11.85   0
  -4  16  -2   55.88   11.63   0
  -4 -16  -2   41.25   11.45   0
   4 -16   2   52.34   14.37   0
   4  16   2   90.46   14.92   0
  -4 -16  -2   56.43   11.85   0
   6  16   2  222.15   15.51   0
   6 -16   2  187.10   14.98   0
   6 -16   2  195.65   15.25   0
  -6 -16  -2  190.03   12.26   0
  -6 -16  -2  229.65   12.74   0
  -6  16  -2  202.71   12.90   0
  25  -1  -3    2.96   14.41   0
  25   1  -3   11.93   11.86   0
  25  -1  -3   12.89   11.66   0
 -25  -1   3   16.87   11.91   0
 -25   1   3   20.48   15.72   0
  25   1  -3   17.44   11.62   0
 -25   1   3    6.73   11.86   0
 -25  -1   3    9.62   15.51   0
  23  -1  -3   64.38   10.71   0
 -23  -1   3   64.99   10.97   0
  23   1  -3   52.65   13.55   0
  23   1  -3   47.50   10.75   0
 -23   1   3   64.34   14.54   0
 -23   1   3   40.06   10.95   0
  23  -1  -3   69.30   13.38   0
 -23  -1   3   51.63   14.42   0
 -21  -1   3    4.07   10.14   0
  21  -1  -3    9.29    9.96   0
  21   1  -3   18.94    9.94   0
 -21   1   3    8.25   13.33   0
  21  -1  -3   13.25   12.31   0
 -21  -1   3    6.39   13.06   0
  21   1  -3    7.08   12.22   0
 -21   1   3   10.42   12.53   0
  19   1  -3  207.21   12.03   0
 -19   1   3  228.62   13.39   0
 -19  -1   3  238.66   13.24   0
  19  -1  -3  209.61    9.85   0
  19  -1  -3  250.56   12.75   0
  19   1  -3  239.37   10.48   0
 -19  -1   3  205.83   10.28   0
 -19   1   3  198.68    9.95   0
  17   1  -3    4.63    8.78   0
 -17  -1   3    1.74    9.01   0
  17   1  -3    4.06    8.99   0
  17  -1  -3    6.31    8.65   0
 -17   1   3    4.65   11.76   0
 -17   1   3   11.07    8.94   0
 -17  -1   3   -7.04   11.65   0
  17  -1  -3   11.96   10.83   0
  15   1  -3  263.01    9.46   0
 -15   1   3  287.83    9.52   0
 -15  -1   3  290.48   12.60   0
  15   1  -3  321.57   12.05   0
  15  -1  -3  268.75    9.43   0
  15  -1  -3  303.70   12.23   0
 -15   1   3  287.50   14.66   0
 -15  -1   3  264.82    9.67   0
 -13  -1   3   98.61    8.58   0
 -13   1   3   91.40    8.73   0
 -13   1   3  100.98   11.75   0
  13  -1  -3  100.71    8.47   0
 -13  -1   3  109.96   11.72   0
  13  -1  -3  106.85   10.82   0
  13   1  -3   92.02    8.42   0
  13   1  -3  114.38   11.15   0
  11   1  -3  283.07    9.13   0
 -11   1   3  289.05    9.35   0
  11  -1  -3  288.32    9.36   0
 -11   1   3  323.83   15.03   0
 -11  -1   3  313.24   12.93   0
  11  -1  -3  332.50   13.69   0
 -11  -1   3  280.92    9.35   0
  11   1  -3  338.79   12.64   0
  -9  -1   3   40.46    8.80   0
   9  -1  -3   38.01    8.08   0
   9   1  -3   32.52    8.15   0
  -9   1   3   39.24    8.11   0
   9   1  -3   44.80    8.74   0
  -9  -1   3   25.26    8.35   0
   9  -1  -3   45.08   11.87   0
  -9   1   3   37.56   12.72   0
  -7   1   3 1098.66   24.51   0
   7  -1  -3 1197.44   24.52   0
  -7  -1   3 1096.12   17.20   0
   7   1  -3 1090.45   16.80   0
  -7  -1   3  972.45   13.63   0
   7   1  -3  987.47   13.24   0
   7  -1  -3  996.46   14.51   0
   5   1  -3    1.46   10.16   0
  -5  -1   3    5.94    8.59   0
   5  -1  -3    9.29   10.18   0
   5  -1  -3    3.59   16.56   0
  -5  -1   3    3.77   10.54   0
  -5   1   3    3.33   15.64   0
   5   1  -3    6.69   10.57   0
  -3  -1   3 1121.86   18.38   0
   3   1  -3 1207.99   18.09   0
   3   1  -3 1281.17   18.57   0
   3  -1  -3 1139.65   26.52   0
   1   1  -3   44.61   11.48   0
   1  -1  -3   60.95   11.18   0
  -1  -1   3   48.43    9.23   0
  -1   1  -3  283.53   16.43   0
   1   1   3  354.74   13.51   0
  -1  -1  -3  376.22   11.88   0
   3   1   3  412.73   11.43   0
  -3  -1  -3  322.78   12.79   0
   3  -1   3  327.56   15.32   0
   3   1   3  326.91   11.30   0
  -3   1  -3  345.31   15.65   0
  -3  -1  -3  426.74   11.38   0
  -3   1  -3  430.72   11.33   0
  -5  -1  -3  412.03   10.47   0
  -5   1  -3  330.01   12.68   0
  -5  -1  -3  317.25   10.86   0
   5  -1   3  309.01   12.78   0
   5   1   3  325.30   12.35   0
  -5   1  -3  421.87   10.41   0
   5   1   3  362.72   10.45   0
   7   1   3  334.30   10.17   0
  -7   1  -3  371.60   12.18   0
  -7  -1  -3  333.69   10.32   0
   7  -1   3  340.74   10.97   0
   7  -1   3  413.88   10.09   0
  -7  -1  -3  409.69   10.09   0
   7   1   3  384.80   10.00   0
  -7   1  -3  434.22   10.06   0
  -9  -1  -3  843.96   11.79   0
   9   1   3  738.79   13.11   0
  -9  -1  -3  739.91   11.83   0
   9  -1   3  676.90   12.07   0
  -9   1  -3  756.21   13.34   0
   9  -1   3  846.69   11.67   0
   9   1   3  816.04   11.67   0
  -9   1  -3  862.17   11.79   0
 -11   1  -3   73.05    8.44   0
 -11   1  -3   61.63   10.02   0
 -11  -1  -3   74.44    8.38   0
 -11  -1  -3   50.29   10.49   0
  11   1   3   59.41    8.66   0
  11  -1   3   68.96    8.49   0
  11   1   3   61.85    8.38   0
  11  -1   3   56.57    8.48   0
 -13   1  -3  917.80   12.20   0
 -13  -1  -3  859.17   11.71   0
 -13  -1  -3 1055.91   12.33   0
  13  -1   3 1009.47   11.89   0
  13   1   3  878.55   11.86   0
  13  -1   3  822.93   11.90   0
  13   1   3  989.97   13.09   0
 -13   1  -3 1015.66   12.12   0
 -15   1  -3    6.15    8.78   0
 -15  -1  -3    6.40    8.85   0
  15  -1   3   -2.13   10.35   0
  15  -1   3   10.65   10.94   0
 -15   1  -3    7.61    8.68   0
  15   1   3   14.53    8.56   0
  15   1   3   13.56    8.71   0
 -15  -1  -3   12.12    8.59   0
  17  -1   3  871.56   13.65   0
  17  -1   3 1023.96   13.95   0
  17   1   3 1054.61   12.28   0
 -17  -1  -3  930.39   12.16   0
 -17   1  -3  939.09   12.35   0
 -17  -1  -3 1072.84   12.86   0
 -17   1  -3 1087.15   12.72   0
  17   1   3  875.11   11.81   0
 -19   1  -3    0.60    9.75   0
 -19  -1  -3    1.99    9.51   0
  19   1   3    7.40    9.64   0
 -19   1  -3    9.23    9.96   0
 -19  -1  -3   10.54    9.92   0
  19  -1   3    1.07   11.99   0
  19  -1   3    9.94    9.37   0
  19   1   3   -3.26   11.61   0
 -21  -1  -3  288.47   10.98   0
 -21   1  -3  336.16   13.93   0
  21   1   3  248.67   12.87   0
 -21   1  -3  278.94   13.37   0
  21   1   3  311.76   11.07   0
  21  -1   3  248.74   11.19   0
 -21  -1  -3  312.87   11.79   0
 -23   1  -3    5.42   11.13   0
 -23  -1  -3   11.94   11.61   0
 -23   1  -3   16.84   11.31   0
  23   1   3   13.69   11.06   0
  23  -1   3   -1.87   11.29   0
  23   1   3   -4.36   10.79   0
 -23  -1  -3   -9.43   13.33   0
  24  -2  -3   12.73   10.97   0
  24   2  -3   -5.06   11.23   0
 -24   2   3    3.30   15.33   0
  24   2  -3    1.50   11.15   0
 -24  -2   3   -2.81   12.23   0
 -24  -2   3    5.69   11.45   0
 -22   2   3  151.43   10.99   0
  22  -2  -3  150.37   13.01   0
 -22  -2   3  168.02   14.28   0
  22   2  -3  147.01   10.98   0
 -22   2   3  169.77   14.72   0
  22   2  -3  175.95   13.34   0
 -22  -2   3  151.44   11.16   0
 -20   2   3   -0.46   13.10   0
  20  -2  -3   -6.19    9.81   0
  20   2  -3    2.35   12.21   0
 -20   2   3   -0.93    9.87   0
  20  -2  -3   -9.16   11.91   0
 -20  -2   3   -0.25   10.33   0
  20   2  -3   -2.92    9.68   0
 -20  -2   3   -4.78   10.19   0
 -18  -2   3  208.42   12.88   0
  18   2  -3  225.03   10.17   0
 -18   2   3  226.46   13.46   0
 -18  -2   3  200.44   10.01   0
  18  -2  -3  208.56    9.86   0
  18  -2  -3  241.94   13.81   0
 -18   2   3  184.96    9.99   0
  18   2  -3  190.41    9.84   0
  16  -2  -3   10.84    8.97   0
 -16   2   3   19.09   13.70   0
 -16  -2   3   30.26    9.05   0
  16   2  -3   19.26    8.93   0
 -16   2   3   23.94    8.78   0
  16  -2  -3   23.71   12.21   0
 -16  -2   3   24.61   11.64   0
  16   2  -3   23.86   11.00   0
  14   2  -3 1063.14   13.68   0
  14  -2  -3  974.96   11.84   0
 -14  -2   3 1000.29   12.33   0
 -14   2   3  935.42   11.57   0
  14  -2  -3 1150.55   17.88   0
 -14  -2   3 1033.86   13.92   0
  14   2  -3  921.90   11.73   0
 -14   2   3 1096.34   19.13   0
 -12  -2   3   16.68    8.29   0
  12  -2  -3   -0.25    9.89   0
 -12   2   3    7.69   12.44   0
  12  -2  -3    9.47   11.33   0
 -12  -2   3    8.96   10.59   0
  12   2  -3   10.69   10.41   0
  12   2  -3   14.79    9.92   0
 -10  -2   3 2161.86   16.34   0
  10   2  -3 2186.77   16.04   0
  10   2  -3 2653.42   21.11   0
 -10  -2   3 2334.58   20.08   0
 -10   2   3 2512.79   29.37   0
  10  -2  -3 2586.39   26.65   0
  10  -2  -3 2218.72   16.32   0
  -8  -2   3    9.76    8.30   0
   8   2  -3    8.70   10.34   0
   8  -2  -3   15.58   14.23   0
   8   2  -3   11.34    8.11   0
  -8   2   3   16.07   15.93   0
  -8  -2   3   20.24   10.35   0
   8  -2  -3    8.63    8.06   0
  -6  -2   3  804.20   13.91   0
  -6  -2   3  763.64   14.15   0
   6   2  -3  721.84   13.95   0
   6   2  -3  829.27   14.30   0
   6  -2  -3  763.97   13.54   0
   4   2  -3  739.34   14.78   0
   4   2  -3  784.74   14.40   0
  -4  -2   3  788.75   13.93   0
  -4  -2   3  749.65   15.00   0
   2  -2  -3  306.00   16.24   0
  -2  -2   3  237.46   12.28   0
   2   2  -3  264.95   14.55   0
  -2   2   3  291.31   17.10   0
   2   2  -3  241.72   10.67   0
  -2  -2   3  248.02   14.70   0
   0   2  -3 3994.08   25.97   0
   0  -2  -3 5033.77   33.98   0
   0  -2   3 4039.42   25.55   0
   0   2   3 4917.05   33.25   0
  -2   2  -3 1551.63   37.07   0
  -2   2  -3 1549.94   16.38   0
  -2  -2  -3 1472.46   17.38   0
   2   2   3 1791.22   18.66   0
  -2  -2  -3 1863.40   19.97   0
  -4  -2  -3 2130.83   18.26   0
   4   2   3 1871.97   17.37   0
  -4  -2  -3 1691.84   17.56   0
  -4   2  -3 1915.48   25.48   0
   4  -2   3 1835.75   25.62   0
   4   2   3 2019.44   19.10   0
  -6   2  -3  264.86   11.68   0
  -6  -2  -3  309.44    9.72   0
  -6  -2  -3  243.96    9.93   0
   6   2   3  241.78    9.95   0
  -6   2  -3  294.47   11.38   0
   6   2   3  277.81    9.59   0
   6  -2   3  253.09   12.13   0
   8   2   3 1507.34   14.11   0
   8   2   3 1138.19   14.97   0
  -8  -2  -3 1464.27   14.15   0
  -8  -2  -3 1171.40   13.89   0
  -8   2  -3 1536.48   14.20   0
  -8   2  -3 1239.18   15.03   0
   8  -2   3 1199.03   15.26   0
 -10   2  -3   69.13   10.16   0
 -10   2  -3   61.81   10.11   0
 -10  -2  -3   63.60    8.71   0
  10  -2   3   56.22   10.36   0
  10   2   3   50.90   10.62   0
 -10  -2  -3   67.14    8.73   0
  10   2   3   62.58    8.33   0
  12  -2   3 1065.65   13.09   0
  12   2   3 1059.74   12.61   0
 -12   2  -3 1329.89   13.05   0
 -12   2  -3 1099.87   14.27   0
  12   2   3 1278.83   14.09   0
 -12  -2  -3 1356.32   13.27   0
 -12  -2  -3 1113.41   14.06   0
 -14  -2  -3  534.27   10.92   0
 -14   2  -3  474.56   10.50   0
 -14  -2  -3  420.25   10.29   0
  14  -2   3  440.40   10.57   0
 -14   2  -3  556.82   10.60   0
  14   2   3  442.33   10.35   0
  14   2   3  539.94   12.08   0
  16  -2   3  162.88   11.63   0
  16   2   3  148.89   11.28   0
 -16   2  -3  164.17    9.70   0
  16   2   3  184.66    9.40   0
 -16   2  -3  190.79    9.59   0
 -16  -2  -3  159.68    9.46   0
 -16  -2  -3  190.42   10.04   0
 -18  -2  -3  412.43   10.80   0
  18  -2   3  389.74   10.74   0
 -18  -2  -3  484.08   13.14   0
 -18   2  -3  479.99   10.85   0
  18   2   3  488.10   10.85   0
  18   2   3  377.62   12.65   0
 -18   2  -3  441.03   12.81   0
  20  -2   3   41.63   12.63   0
 -20  -2  -3   50.46   10.53   0
  20   2   3   42.12   10.18   0
 -20  -2  -3   52.80   10.09   0
  20   2   3   39.49    9.91   0
 -20   2  -3   37.96   10.38   0
 -20   2  -3   42.61   10.22   0
 -22  -2  -3   66.44   11.31   0
 -22   2  -3   95.91   11.60   0
 -22  -2  -3  112.07   14.07   0
  22  -2   3   82.64   13.66   0
 -22   2  -3   91.30   11.01   0
  22   2   3   96.16   13.36   0
  22   2   3   74.84   10.90   0
 -24   2  -3  164.57   12.85   0
 -24  -2  -3  157.26   12.84   0
  24   2   3  128.49   11.80   0
  24  -2   3  120.43   14.85   0
  24   2   3  175.85   12.00   0
 -24  -2  -3  129.43   11.86   0
 -24   2  -3  146.69   12.25   0
 -25  -3   3   30.99   12.03   0
  25   3  -3   39.73   12.08   0
  23  -3  -3   55.99   13.46   0
 -23  -3   3   85.81   14.67   0
  23   3  -3   84.82   10.93   0
 -23   3   3   84.04   15.08   0
  23   3  -3   91.98   13.79   0
 -23  -3   3   79.32   11.60   0
  21  -3  -3   96.46   10.26   0
  21   3  -3  127.81   10.41   0
 -21   3   3  115.09   14.29   0
  21   3  -3  126.03   10.83   0
 -21  -3   3  110.78   13.68   0
 -21  -3   3  111.94   10.57   0
 -19  -3   3   42.95    9.79   0
  19  -3  -3   32.40    9.50   0
  19   3  -3   47.83    9.73   0
  19   3  -3   51.55    9.81   0
 -19  -3   3   47.68   12.49   0
 -19   3   3   55.41   14.81   0
 -17   3   3  340.59   14.20   0
  17   3  -3  363.24   12.54   0
  17  -3  -3  294.46    9.92   0
 -17  -3   3  301.51   10.39   0
 -17  -3   3  328.10   13.08   0
  17   3  -3  313.32   12.16   0
  15   3  -3  140.54    9.60   0
  15  -3  -3  112.35    9.22   0
 -15  -3   3  126.59    9.34   0
 -15  -3   3  135.24   11.94   0
 -15   3   3  145.19   14.36   0
  15   3  -3  123.04    8.91   0
  13  -3  -3  104.31    8.63   0
  13   3  -3  116.26   11.34   0
 -13  -3   3   97.45    9.40   0
 -13  -3   3   92.66    8.83   0
 -13   3   3  106.86   13.59   0
  13   3  -3   91.68    8.64   0
  11   3  -3  939.62   14.31   0
  11  -3  -3  776.66   11.28   0
  11   3  -3  759.73   11.50   0
 -11   3   3  878.70   20.40   0
 -11  -3   3  843.02   14.09   0
 -11  -3   3  768.65   11.73   0
  -9  -3   3    8.12    8.01   0
  -9   3   3    8.40   16.36   0
   9   3  -3    6.08    8.42   0
   9   3  -3   13.35    7.94   0
  -9  -3   3   10.37    8.40   0
   9  -3  -3   10.28   10.00   0
   7   3  -3 1022.12   13.44   0
   7  -3  -3 1075.07   13.16   0
  -7  -3   3 1078.21   14.38   0
  -7  -3   3 1089.96   14.74   0
   7   3  -3 1167.34   14.99   0
   5   3  -3   14.06    8.16   0
  -5  -3   3   14.16   10.24   0
  -5  -3   3   13.31    8.86   0
   5   3  -3   20.20   10.82   0
  -3  -3   3 1142.61   18.49   0
   3   3  -3 1177.12   15.53   0
  -3   3   3 1295.98   27.14   0
   3   3  -3 1158.63   19.17   0
   3  -3  -3 1333.85   28.51   0
  -3  -3   3 1129.36   14.82   0
  -1   3   3  275.77   12.94   0
   1  -3  -3  304.38   15.20   0
  -1  -3   3  243.51   16.63   0
   1   3  -3  247.11   10.32   0
   1   3  -3  240.97   16.80   0
  -1  -3   3  249.62   10.35   0
   1   3   3 2438.69   22.15   0
  -1  -3  -3 2518.74   22.65   0
  -1   3  -3 2005.49   17.67   0
   1  -3   3 1992.57   17.68   0
   3  -3   3  103.17   18.41   0
  -3  -3  -3   96.42   11.05   0
  -3   3  -3   87.31    8.78   0
   3   3   3   98.36    9.33   0
  -3  -3  -3  115.65    9.47   0
  -5  -3  -3 2253.22   18.12   0
   5  -3   3 1989.11   24.02   0
  -5   3  -3 2084.95   23.84   0
  -5  -3  -3 1764.43   16.56   0
   5   3   3 1800.12   16.44   0
   5   3   3 2084.93   17.54   0
  -7   3  -3   64.30   10.17   0
   7  -3   3   60.27   11.89   0
  -7  -3  -3   63.46   10.52   0
  -7   3  -3   72.85    8.37   0
   7   3   3   62.34    8.67   0
   7   3   3   76.99    8.39   0
  -7  -3  -3   82.00    8.61   0
   9   3   3 1594.33   14.57   0
  -9  -3  -3 1619.36   14.73   0
  -9  -3  -3 1965.14   15.55   0
  -9   3  -3 1669.93   17.69   0
  -9   3  -3 2149.46   15.68   0
   9  -3   3 1612.39   16.86   0
   9   3   3 1949.34   15.23   0
 -11  -3  -3   34.94    9.02   0
 -11  -3  -3   29.78    8.62   0
 -11   3  -3   24.67    8.37   0
 -11   3  -3   26.87    8.12   0
  11   3   3   32.74   10.47   0
  11   3   3   34.78   10.39   0
  11  -3   3   38.46   10.08   0
  13  -3   3   80.97    8.89   0
 -13   3  -3   85.35    8.69   0
  13   3   3   82.16   10.70   0
 -13  -3  -3   80.83    8.72   0
 -13  -3  -3   96.41   11.15   0
  13   3   3   93.34    9.03   0
 -13   3  -3   89.60    8.73   0
  15   3   3   -2.18    9.01   0
  15  -3   3   12.18    9.00   0
 -15  -3  -3   27.05    9.37   0
 -15   3  -3   21.96    8.71   0
  15   3   3   15.27    8.95   0
 -15  -3  -3    9.21    9.08   0
 -15   3  -3    9.37    8.76   0
 -17  -3  -3   10.63    9.18   0
 -17  -3  -3   16.62    9.62   0
  17  -3   3   14.53    9.53   0
  17   3   3    9.08    8.99   0
 -17   3  -3   11.64    8.96   0
  17   3   3   16.32    9.30   0
 -17   3  -3   16.10   11.46   0
  19   3   3   72.33   10.07   0
  19  -3   3   84.46   10.21   0
 -19  -3  -3   94.81   10.62   0
 -19  -3  -3   96.56   10.03   0
  19   3   3   96.27   10.13   0
 -19   3  -3   83.40   12.35   0
 -19   3  -3   91.73   12.31   0
 -21  -3  -3   96.10   10.74   0
 -21   3  -3  118.88   11.00   0
  21  -3   3   97.27   11.12   0
  21   3   3   86.34   10.52   0
  21   3   3  106.62   10.88   0
 -21  -3  -3  103.92   11.72   0
 -21   3  -3  105.15   10.82   0
 -23  -3  -3   31.82   11.24   0
 -23   3  -3   39.68   12.16   0
  23  -3   3   30.50   14.13   0
 -23  -3  -3   36.09   12.13   0
  23   3   3   42.92   11.42   0
  23   3   3   30.45   11.62   0
 -23   3  -3   29.89   11.62   0
  24  -4  -3   28.10   11.64   0
 -24  -4   3   22.90   15.21   0
  24   4  -3   31.46   11.35   0
 -24  -4   3   30.58   11.41   0
 -24   4   3   20.73   15.66   0
  24   4  -3   27.00   14.10   0
  22  -4  -3    2.01   10.43   0
 -22  -4   3    6.10   10.80   0
  22   4  -3   13.78   12.81   0
 -22   4   3   -0.83   14.51   0
  22   4  -3   16.89   13.07   0
 -22  -4   3   10.91   14.11   0
  20   4  -3   79.70   12.49   0
 -20  -4   3   75.60   10.29   0
 -20   4   3  101.15   16.00   0
  20   4  -3   84.42   10.21   0
  20  -4  -3   77.24   10.07   0
 -20  -4   3   79.74   10.87   0
  18   4  -3   -3.00   11.41   0
  18  -4  -3   11.70    9.22   0
  18   4  -3    7.53    9.41   0
 -18  -4   3    8.99    9.51   0
 -18  -4   3   11.67    9.88   0
 -18   4   3    9.71   12.45   0
 -16  -4   3  199.99   12.37   0
  16  -4  -3  194.93    9.42   0
 -16  -4   3  183.20    9.71   0
  16   4  -3  200.10    9.39   0
 -16   4   3  218.02   15.24   0
  16   4  -3  224.90   12.24   0
 -14  -4   3   83.59    9.21   0
  14   4  -3   84.13    9.01   0
 -14   4   3  106.89   14.05   0
  14  -4  -3  100.14    8.98   0
 -14  -4   3   95.38    9.70   0
  14   4  -3  102.08    9.37   0
  12   4  -3   -4.05    8.31   0
 -12   4   3    6.12   13.61   0
  12   4  -3    3.10    8.96   0
 -12  -4   3    2.16    8.52   0
 -12  -4   3   -0.92   11.08   0
 -12   4   3    5.82   11.20   0
  12  -4  -3    0.82    8.28   0
 -10  -4   3  339.10   10.28   0
 -10   4   3  374.79   16.98   0
 -10   4   3  308.49   16.51   0
  10   4  -3  312.19    9.86   0
  10   4  -3  357.92   11.95   0
  10  -4  -3  344.81    9.72   0
 -10  -4   3  318.50   11.68   0
  -8  -4   3  630.94   11.43   0
  -8   4   3  702.44   25.66   0
   8   4  -3  633.97   12.75   0
  -8  -4   3  754.93   12.19   0
   8   4  -3  748.33   12.36   0
  -8   4   3  792.35   25.74   0
   8  -4  -3  674.83   11.39   0
   6   4  -3  791.43   12.91   0
  -6   4   3  877.25   30.84   0
  -6  -4   3  858.29   12.75   0
  -6  -4   3  767.55   12.85   0
   6   4  -3  860.60   14.57   0
   4   4  -3  376.40   10.92   0
   4   4  -3  351.68   12.63   0
  -4   4   3  429.98   19.92   0
  -4  -4   3  338.46   12.65   0
  -4  -4   3  388.96   10.72   0
   4  -4  -3  398.94   17.87   0
  -2  -4   3  437.67   15.90   0
   2   4  -3  435.88   14.30   0
  -2   4   3  526.95   16.84   0
   2   4  -3  481.82   11.25   0
  -2  -4   3  446.12   12.57   0
   2  -4  -3  520.83   15.08   0
   0   4   3 1760.26   21.01   0
   0  -4   3 1519.87   32.13   0
   0  -4  -3 1893.77   21.00   0
   0  -4   3 1588.50   15.58   0
   0   4  -3 1571.65   15.52   0
   2  -4   3   11.19    8.07   0
   2   4   3    5.05   10.86   0
  -2  -4  -3    7.04    8.83   0
  -2   4  -3    6.99    8.09   0
  -2  -4  -3    3.79    8.26   0
   2  -4   3    5.89   18.10   0
   4  -4   3  254.08   15.54   0
  -4  -4  -3  290.81   11.99   0
  -4  -4  -3  232.08    9.47   0
  -4   4  -3  222.58   11.02   0
   4   4   3  262.62   10.20   0
   6   4   3    4.18    8.48   0
  -6  -4  -3    8.22   10.33   0
   6   4   3    5.84    8.22   0
  -6   4  -3    6.45    7.95   0
   6  -4   3    5.79   11.01   0
  -6  -4  -3    1.51    8.15   0
  -8  -4  -3  330.37   10.03   0
  -8  -4  -3  260.52    9.57   0
   8   4   3  239.63    9.36   0
   8  -4   3  257.96   11.84   0
  -8   4  -3  318.79    9.73   0
   8   4   3  302.99    9.71   0
  -8   4  -3  287.50   11.77   0
 -10  -4  -3  150.12    9.16   0
  10  -4   3  123.07   10.67   0
  10   4   3  143.89    9.13   0
 -10   4  -3  150.88   10.51   0
 -10  -4  -3  117.74    9.15   0
 -10   4  -3  125.49   10.52   0
  10   4   3  128.82    8.92   0
  12  -4   3   24.13   10.29   0
 -12  -4  -3   29.92    8.87   0
 -12   4  -3   19.26    9.99   0
  12   4   3   21.89    8.63   0
 -12  -4  -3   20.44    8.98   0
 -12   4  -3   25.29    8.24   0
  12   4   3   28.13   10.99   0
  14   4   3  120.21   11.47   0
  14  -4   3  117.87    9.34   0
 -14  -4  -3  145.79    9.78   0
 -14   4  -3  148.31    9.28   0
 -14  -4  -3  120.70   11.32   0
  14   4   3  139.71    9.61   0
 -14   4  -3  127.43   10.85   0
 -16  -4  -3  154.07   11.85   0
  16  -4   3  152.88   11.86   0
 -16   4  -3  188.47    9.93   0
  16   4   3  153.24    9.94   0
  16   4   3  188.82   10.06   0
 -16   4  -3  174.23    9.63   0
 -16  -4  -3  192.63   12.37   0
 -18   4  -3    0.08    9.86   0
  18  -4   3    4.56    9.85   0
 -18  -4  -3   -4.03   10.23   0
 -18   4  -3    5.34    9.57   0
 -18  -4  -3    4.37    9.78   0
  18   4   3    6.61    9.74   0
  18   4   3    6.21    9.59   0
 -20   4  -3   53.48   10.28   0
  20  -4   3   67.62   12.78   0
 -20   4  -3   86.39   12.81   0
 -20  -4  -3   62.61   10.78   0
  20   4   3   73.21   10.34   0
 -20  -4  -3   59.57   10.28   0
  20   4   3   83.60   12.76   0
 -22  -4  -3   19.81   11.61   0
 -22  -4  -3   17.08   11.07   0
  22  -4   3   12.40   11.45   0
  22   4   3   20.78   10.96   0
 -22   4  -3   25.73   11.45   0
  22   4   3   13.91   11.08   0
 -22   4  -3   28.82   13.60   0
 -23  -5   3    3.50   11.25   0
 -23  -5   3   -5.36   12.18   0
 -23   5   3   -3.81   17.59   0
  23   5  -3    9.42   11.22   0
  23  -5  -3   -0.78   10.99   0
 -23   5   3    8.63   15.72   0
  23   5  -3   15.00   10.95   0
 -21   5   3   12.13   14.57   0
  21   5  -3   11.08   10.52   0
 -21   5   3   13.15   16.39   0
  21   5  -3   20.82   10.48   0
  21  -5  -3   14.27   10.28   0
 -21  -5   3   17.35   10.74   0
 -21  -5   3   11.16   13.69   0
 -19   5   3  363.86   15.53   0
  19   5  -3  446.46   13.67   0
 -19   5   3  477.62   17.82   0
 -19  -5   3  416.98   13.33   0
  19   5  -3  409.24   10.81   0
  19  -5  -3  393.93   12.85   0
 -19  -5   3  405.18   14.18   0
  17  -5  -3  147.10    9.72   0
  17   5  -3  172.91   10.41   0
  17   5  -3  140.17    9.44   0
 -17   5   3  180.70   15.39   0
 -17   5   3  134.63   13.77   0
 -17  -5   3  162.23   10.71   0
 -17  -5   3  143.53   10.17   0
 -15  -5   3 1129.45   12.66   0
  15  -5  -3 1165.09   12.55   0
  15   5  -3 1351.11   14.34   0
 -15   5   3 1366.96   22.22   0
  15   5  -3 1100.77   12.26   0
 -15  -5   3 1215.12   13.98   0
 -15   5   3 1084.76   18.62   0
 -13  -5   3  450.50   11.27   0
 -13  -5   3  416.68   10.24   0
  13   5  -3  487.50   12.78   0
 -13   5   3  492.80   17.51   0
  13   5  -3  415.31   11.70   0
 -13   5   3  398.98   15.84   0
  13  -5  -3  429.59   10.32   0
 -11   5   3  754.05   19.51   0
 -11  -5   3  677.74   11.94   0
  11   5  -3  623.83   11.01   0
  11   5  -3  792.13   12.36   0
 -11   5   3  611.55   18.03   0
 -11  -5   3  600.35   11.06   0
  11  -5  -3  661.07   10.95   0
  -9  -5   3  116.26    9.35   0
  -9   5   3  101.81   15.19   0
  -9  -5   3  100.82   10.49   0
   9   5  -3  111.78    9.56   0
   9  -5  -3   98.08    8.41   0
   9   5  -3  105.49   10.62   0
  -9   5   3  124.78   16.07   0
  -7  -5   3  470.61   10.92   0
   7   5  -3  453.54   12.02   0
  -7   5   3  518.98   20.25   0
   7   5  -3  544.66   11.16   0
  -7  -5   3  506.59   11.06   0
   5  -5  -3   18.83   11.59   0
  -5  -5   3   31.66    8.54   0
  -5   5   3   23.69   12.62   0
   5   5  -3   19.07   10.08   0
  -5  -5   3   19.97   10.25   0
   5   5  -3   24.71   10.48   0
  -3   5   3 1397.78   21.15   0
  -3  -5   3 1229.11   15.29   0
   3   5  -3 1286.08   14.36   0
   3  -5  -3 1467.47   21.15   0
   3   5  -3 1263.12   17.96   0
  -3  -5   3 1186.51   18.35   0
  -1  -5   3  151.84   13.98   0
  -1  -5   3  165.70    9.15   0
  -1   5   3  174.02   12.22   0
   1   5  -3  141.21   10.73   0
   1  -5  -3  188.62   11.54   0
  -1   5  -3  441.15   12.00   0
   1   5   3  541.89   12.46   0
   1  -5   3  471.89   10.53   0
   1  -5   3  460.49   18.78   0
  -1  -5  -3  554.00   12.27   0
   3  -5   3   93.80   15.26   0
   3  -5   3   82.73    8.37   0
  -3   5  -3   79.43   10.06   0
  -3  -5  -3   92.71   11.08   0
  -3  -5  -3   72.95   10.07   0
   3   5   3   94.90   11.26   0
   5  -5   3  194.02   12.80   0
   5   5   3  206.42    9.79   0
  -5  -5  -3  213.20    9.72   0
  -5  -5  -3  154.38    9.05   0
  -5   5  -3  172.81    8.96   0
   7  -5   3   19.25   10.05   0
   7   5   3   20.52   10.02   0
   7   5   3   15.61    8.52   0
  -7  -5  -3   17.81    8.19   0
  -7  -5  -3   23.99    8.45   0
  -7   5  -3   14.37    8.24   0
   9   5   3  329.95    9.99   0
  -9   5  -3  331.61    9.56   0
  -9  -5  -3  263.58    9.67   0
  -9  -5  -3  305.93    9.95   0
   9   5   3  278.29    9.63   0
  -9   5  -3  256.36   10.87   0
   9  -5   3  271.35   11.60   0
  11  -5   3   30.09    8.51   0
 -11   5  -3   44.83   10.27   0
 -11   5  -3   32.90    8.27   0
  11   5   3   48.88    9.02   0
 -11  -5  -3   35.06    8.87   0
 -11  -5  -3   38.06    9.05   0
  11   5   3   36.00    8.72   0
 -13  -5  -3   88.15    9.33   0
  13  -5   3   83.97   10.89   0
  13   5   3   87.46    9.39   0
 -13  -5  -3  109.29    9.62   0
 -13   5  -3  114.05    9.07   0
  13   5   3  111.88    9.44   0
 -15   5  -3   18.60   11.07   0
  15  -5   3    7.44   11.19   0
  15   5   3   11.31    9.44   0
 -15  -5  -3   14.17   11.38   0
  15   5   3   13.67    9.41   0
 -15   5  -3   18.26    8.92   0
 -15  -5  -3   11.80    9.62   0
 -17  -5  -3   12.51    9.45   0
  17  -5   3   14.83   11.77   0
 -17  -5  -3   11.36    9.95   0
  17   5   3   -2.67    9.63   0
  17   5   3   12.15    9.65   0
 -17   5  -3   12.31   11.50   0
 -17   5  -3   16.22    9.59   0
 -19   5  -3   99.11   10.52   0
  19   5   3   78.59   10.20   0
 -19  -5  -3   88.92   10.32   0
  19  -5   3   68.31   12.89   0
 -19  -5  -3   94.82   10.66   0
  19   5   3  107.77   10.68   0
 -19   5  -3   86.48   10.43   0
  21   5   3    6.78   10.55   0
 -21   5  -3   31.22   10.89   0
  21  -5   3   12.92   13.68   0
 -21  -5  -3   22.24   11.53   0
 -21  -5  -3   14.58   10.80   0
  21   5   3   34.33   10.90   0
 -23  -5  -3   12.65   11.61   0
 -23   5  -3   17.96   11.57   0
  23  -5   3   12.31   12.18   0
 -23  -5  -3   15.94   12.09   0
  23   5   3    3.21   11.52   0
  23   5   3   21.17   11.72   0
 -22  -6   3  130.20   11.30   0
 -22   6   3  123.43   16.09   0
  22  -6  -3  134.19   11.24   0
 -22   6   3  163.93   18.08   0
  22   6  -3  141.97   10.97   0
  22   6  -3  133.25   14.34   0
 -22  -6   3  143.77   12.24   0
  20   6  -3   53.39   12.83   0
  20  -6  -3   31.02   12.55   0
  20   6  -3   44.01   10.08   0
 -20   6   3   28.35   14.77   0
 -20   6   3   53.44   16.48   0
 -20  -6   3   34.13   12.46   0
 -20  -6   3   46.47   11.03   0
 -18   6   3  220.17   16.43   0
 -18   6   3  161.54   14.80   0
  18   6  -3  198.29   12.90   0
 -18  -6   3  188.77   10.37   0
  18   6  -3  179.08   10.08   0
 -18  -6   3  204.23   10.92   0
  18  -6  -3  183.11   10.20   0
 -16  -6   3   19.99    9.15   0
  16   6  -3   24.39   10.03   0
  16   6  -3   23.38    8.75   0
  16  -6  -3   24.85    9.12   0
 -16   6   3   25.75   14.72   0
 -16   6   3   28.69   14.28   0
 -16  -6   3   30.24    9.57   0
 -14  -6   3   75.33   11.90   0
 -14   6   3   94.73   14.95   0
 -14  -6   3   80.50    9.31   0
  14  -6  -3   83.43    9.29   0
  14   6  -3   64.74    9.08   0
 -14   6   3   65.77   14.27   0
  14   6  -3   84.84    9.76   0
 -12  -6   3  205.66    9.89   0
  12  -6  -3  195.78   11.21   0
  12   6  -3  189.08   11.00   0
  12   6  -3  230.70    9.94   0
 -12   6   3  192.02   14.71   0
 -12  -6   3  188.14    9.44   0
 -12   6   3  235.27   15.35   0
 -10   6   3  413.89   16.69   0
 -10  -6   3  436.29   10.67   0
 -10  -6   3  386.77   12.07   0
  10   6  -3  438.43   10.88   0
  10   6  -3  411.30   11.89   0
 -10   6   3  474.07   16.95   0
  10  -6  -3  417.99   10.13   0
   8   6  -3  203.73   10.69   0
  -8  -6   3  220.76    9.70   0
  -8  -6   3  208.32   11.11   0
  -8   6   3  231.18   14.32   0
   8   6  -3  227.35    9.84   0
   6   6  -3  999.71   13.39   0
  -6  -6   3 1125.53   13.31   0
   6  -6  -3 1135.80   19.45   0
  -6   6   3 1215.07   21.41   0
   6   6  -3 1127.26   13.37   0
  -6  -6   3 1075.60   15.35   0
   4   6  -3    2.21    8.47   0
  -4   6   3    6.39   12.40   0
   4  -6  -3    8.82   11.53   0
  -4  -6   3   -0.45   10.60   0
   4   6  -3    4.53   10.07   0
  -4  -6   3    7.39    8.44   0
  -2  -6   3  646.75   11.39   0
  -2  -6   3  621.94   15.08   0
   2  -6  -3  763.91   14.89   0
  -2   6   3  724.89   15.57   0
   2   6  -3  683.49   11.65   0
   0  -6   3   73.45   12.39   0
   0   6   3   91.69   11.21   0
   0   6  -3   81.29    8.77   0
   0  -6   3   85.51   10.35   0
   0  -6  -3   90.48    8.92   0
   2   6   3  589.17   11.98   0
  -2  -6  -3  513.80   10.55   0
   2  -6   3  484.97   17.59   0
   2  -6   3  506.46   10.68   0
  -2  -6  -3  602.53   11.92   0
  -2   6  -3  531.19   10.64   0
  -4  -6  -3  216.69   11.58   0
   4   6   3  224.86    9.76   0
  -4   6  -3  186.10    9.07   0
   4  -6   3  209.92   13.18   0
   4  -6   3  196.61    9.14   0
  -4  -6  -3  176.31   10.79   0
   6  -6   3  773.21   15.28   0
  -6  -6  -3  655.40   11.10   0
  -6  -6  -3  837.11   12.28   0
   6   6   3  801.93   12.32   0
  -6   6  -3  681.68   11.28   0
   8   6   3  222.13    9.68   0
  -8   6  -3  207.74    9.08   0
  -8  -6  -3  215.16    9.36   0
  -8  -6  -3  251.78    9.77   0
   8   6   3  194.95   11.16   0
   8  -6   3  223.08   11.58   0
  10   6   3  558.53   11.01   0
  10  -6   3  491.19   12.81   0
 -10  -6  -3  493.65   10.96   0
 -10   6  -3  603.67   10.72   0
 -10  -6  -3  602.05   11.20   0
  10   6   3  492.22   10.79   0
 -10   6  -3  498.55   10.25   0
  12  -6   3  393.92   12.57   0
 -12  -6  -3  388.81   10.59   0
 -12  -6  -3  469.63   10.76   0
 -12   6  -3  365.65    9.91   0
  12   6   3  373.36   10.22   0
  12   6   3  452.79   10.51   0
 -12   6  -3  473.81   10.27   0
 -14  -6  -3  336.67   10.80   0
  14  -6   3  289.06   12.22   0
 -14   6  -3  257.37    9.92   0
  14   6   3  286.59   12.63   0
 -14   6  -3  344.80   11.97   0
 -14  -6  -3  280.12   12.37   0
  14   6   3  319.50   10.35   0
  16  -6   3  317.25   12.53   0
 -16   6  -3  373.83   10.64   0
 -16  -6  -3  377.90   13.00   0
  16   6   3  305.87   10.57   0
 -16  -6  -3  300.59   10.43   0
 -16   6  -3  283.69   10.43   0
  16   6   3  377.61   10.74   0
 -18  -6  -3   87.71   10.41   0
  18   6   3   92.99   10.50   0
 -18  -6  -3  105.42   13.04   0
 -18   6  -3  113.14   12.61   0
  18  -6   3   84.94   12.62   0
  18   6   3  122.56   10.43   0
 -18   6  -3   85.33    9.97   0
 -20   6  -3  161.41   11.18   0
 -20  -6  -3  118.27   11.38   0
  20  -6   3  130.59   11.29   0
 -20   6  -3  107.64   10.69   0
  20   6   3  106.11   11.08   0
 -20  -6  -3  147.00   11.31   0
  20   6   3  138.12   11.05   0
 -22   6  -3   60.34   12.11   0
  22  -6   3   51.35   11.89   0
 -22   6  -3   47.08   11.44   0
 -22  -6  -3   37.62   11.54   0
  22   6   3   50.51   11.27   0
 -22  -6  -3   62.02   11.98   0
  22   6   3   70.45   11.50   0
  23   7  -3   55.47   12.04   0
 -23  -7   3   62.00   12.14   0
 -23  -7   3   62.23   15.42   0
  23   7  -3   58.43   11.77   0
 -23   7   3   66.72   18.79   0
 -23   7   3   57.19   17.11   0
  23  -7  -3   60.02   11.65   0
 -21  -7   3   64.99   11.25   0
  21   7  -3   63.06   11.22   0
 -21   7   3   68.05   17.61   0
  21   7  -3   52.14   10.59   0
 -21  -7   3   53.13   11.83   0
 -21   7   3   58.84   15.84   0
  21  -7  -3   67.89   10.91   0
 -19  -7   3  278.26   11.09   0
  19   7  -3  323.34   11.64   0
 -19   7   3  345.21   19.81   0
 -19   7   3  265.36   17.79   0
  19  -7  -3  288.80   11.00   0
  19   7  -3  282.75   10.84   0
 -19  -7   3  298.61   11.97   0
 -17  -7   3   44.21   10.62   0
 -17   7   3   51.24   16.53   0
  17   7  -3   47.72   12.44   0
 -17  -7   3   39.60    9.74   0
 -17   7   3   39.07   14.20   0
  17  -7  -3   41.82    9.68   0
  17   7  -3   63.36    9.28   0
 -15  -7   3  179.10   10.50   0
 -15   7   3  165.90   14.13   0
  15   7  -3  189.06    9.93   0
  15   7  -3  160.79   11.64   0
 -15  -7   3  156.72    9.87   0
  15  -7  -3  188.68   11.68   0
 -15   7   3  208.46   16.26   0
  13   7  -3   34.95   10.72   0
 -13  -7   3   43.78    9.11   0
 -13  -7   3   37.71    9.74   0
  13   7  -3   56.97    9.49   0
  13  -7  -3   45.55   11.12   0
 -13   7   3   40.50   12.89   0
 -13   7   3   53.84   14.44   0
  11  -7  -3   31.97    8.72   0
  11   7  -3   32.22   10.54   0
 -11  -7   3   36.01    8.70   0
 -11   7   3   32.79   12.71   0
 -11  -7   3   35.38    9.18   0
  11   7  -3   33.09   11.16   0
 -11   7   3   39.45   12.40   0
  -9   7   3   75.87   14.22   0
  -9  -7   3   58.74    8.96   0
  -9  -7   3   68.71    8.90   0
   9   7  -3   61.43   10.65   0
   9   7  -3   82.41    9.11   0
  -7  -7   3  473.82   12.43   0
  -7  -7   3  451.54   10.67   0
   7   7  -3  461.08   12.22   0
   7  -7  -3  486.08   15.00   0
   7   7  -3  530.77   10.99   0
  -7   7   3  515.00   16.03   0
  -5  -7   3  462.85   12.93   0
   5  -7  -3  504.75   13.63   0
   5   7  -3  436.73   12.43   0
  -5  -7   3  525.89   10.68   0
  -5   7   3  509.21   15.98   0
   5   7  -3  508.70   12.43   0
  -3  -7   3 2094.78   20.97   0
   3  -7  -3 2388.14   21.52   0
  -3   7   3 2323.22   22.68   0
   3   7  -3 2233.37   17.84   0
  -3  -7   3 2104.14   16.12   0
   1  -7  -3 1118.39   14.84   0
  -1  -7   3 1031.02   14.02   0
   1   7  -3 1030.94   14.11   0
  -1  -7   3  951.83   17.97   0
  -1   7   3 1141.56   15.25   0
   1   7   3 1626.22   16.42   0
   1  -7   3 1398.68   13.75   0
   1  -7   3 1427.84   20.63   0
  -1   7  -3 1453.83   13.84   0
  -1  -7  -3 1575.64   16.74   0
  -3  -7  -3  326.23    9.75   0
   3   7   3  396.84   10.97   0
  -3  -7  -3  402.13   10.81   0
   3  -7   3  361.21    9.93   0
  -3   7  -3  327.78   11.42   0
  -5   7  -3  581.21   10.62   0
  -5  -7  -3  556.00   10.65   0
   5  -7   3  629.76   14.65   0
  -5  -7  -3  665.72   13.41   0
   5   7   3  659.79   11.82   0
  -7  -7  -3   28.50    8.55   0
  -7   7  -3   41.48    9.91   0
  -7  -7  -3   39.91   10.86   0
   7   7   3   31.05    9.16   0
   7  -7   3   37.71   12.00   0
  -9  -7  -3  589.47   12.97   0
   9   7   3  604.13   11.30   0
  -9  -7  -3  499.55   10.88   0
   9   7   3  472.49   10.65   0
   9  -7   3  524.82   13.32   0
  -9   7  -3  515.38   10.31   0
  11   7   3   61.34    9.36   0
  11  -7   3   51.97   11.02   0
 -11   7  -3   34.59   10.44   0
 -11  -7  -3   39.29    9.40   0
 -11  -7  -3   48.28   11.46   0
  11   7   3   48.00    9.11   0
 -11   7  -3   48.62    8.85   0
  13  -7   3  351.88   12.50   0
  13   7   3  343.38   10.51   0
 -13  -7  -3  354.22   10.61   0
 -13  -7  -3  433.98   11.09   0
 -13   7  -3  328.07   10.16   0
 -13   7  -3  436.21   10.54   0
  13   7   3  385.36   10.71   0
 -15  -7  -3   17.48    9.66   0
 -15  -7  -3   17.95    9.66   0
  15  -7   3    2.36   11.59   0
 -15   7  -3    2.98    9.04   0
 -15   7  -3   17.58   11.41   0
  15   7   3   -2.27    9.54   0
  15   7   3   -1.96    9.66   0
  17  -7   3  202.22   13.23   0
  17   7   3  203.75   10.82   0
 -17  -7  -3  253.24   10.90   0
  17   7   3  250.38   10.76   0
 -17   7  -3  248.21   12.64   0
 -17   7  -3  194.07   10.51   0
 -17  -7  -3  226.07   10.84   0
 -19  -7  -3   14.98   10.53   0
  19  -7   3    8.98   10.93   0
  19   7   3   13.69   10.51   0
  19   7   3    3.14   10.47   0
 -19  -7  -3    4.38   13.49   0
 -19   7  -3   12.69   12.83   0
 -19   7  -3    5.70   10.39   0
 -21   7  -3  107.13   11.49   0
 -21  -7  -3  112.50   11.73   0
  21  -7   3   93.90   14.77   0
 -21  -7  -3  115.89   11.86   0
  21   7   3  100.43   14.08   0
  21   7   3  106.27   14.11   0
 -21   7  -3  118.54   11.74   0
 -22  -8   3    3.65   11.87   0
  22   8  -3    0.61   14.76   0
  22  -8  -3   20.39   13.88   0
  22   8  -3   -8.31   11.60   0
 -22   8   3   -2.74   20.36   0
 -22   8   3    4.46   18.78   0
 -22  -8   3   11.57   14.88   0
 -20   8   3   21.79   17.69   0
  20  -8  -3   27.59   10.72   0
 -20  -8   3   11.92   13.96   0
 -20   8   3   28.11   17.16   0
  20   8  -3   17.10   13.17   0
 -20  -8   3   19.53   11.12   0
  20   8  -3   27.46   11.21   0
 -18  -8   3    4.20   10.26   0
  18   8  -3   16.27   12.22   0
  18  -8  -3    2.84    9.98   0
  18   8  -3   14.72   10.65   0
 -18   8   3    8.62   17.15   0
 -18  -8   3    2.86   10.87   0
 -18   8   3   10.67   16.07   0
  16  -8  -3   82.73   11.71   0
  16   8  -3   74.20    9.86   0
 -16  -8   3   79.79   12.01   0
  16   8  -3   92.30   10.38   0
 -16  -8   3   84.63   10.59   0
 -16   8   3   74.33   16.06   0
 -16   8   3   87.01   14.85   0
 -14  -8   3   24.24    9.18   0
 -14   8   3   31.29   13.00   0
 -14  -8   3   18.27    9.96   0
  14   8  -3   33.87    9.74   0
  14   8  -3   27.04    9.03   0
 -14   8   3   24.43   13.56   0
  14  -8  -3   23.11   11.40   0
 -12  -8   3   19.13   11.31   0
 -12   8   3   24.58   15.00   0
  12  -8  -3   27.80    8.76   0
  12   8  -3   25.05    9.61   0
  12   8  -3   30.93    8.84   0
 -12  -8   3   22.72   11.46   0
 -12   8   3   27.20   14.50   0
 -10   8   3   31.87   13.20   0
 -10  -8   3   32.00   11.40   0
  10   8  -3   32.99   10.90   0
  10   8  -3   35.69    9.50   0
 -10  -8   3   36.55   10.86   0
   8   8  -3  327.67   10.06   0
  -8  -8   3  318.63   10.34   0
   8   8  -3  278.86    9.86   0
  -8   8   3  313.39   13.32   0
  -8  -8   3  252.35   10.04   0
  -6  -8   3   45.58   10.83   0
   6   8  -3   42.28   10.51   0
  -6  -8   3   58.07    8.83   0
  -6   8   3   43.86   13.23   0
   6   8  -3   50.33    8.95   0
   6  -8  -3   46.48   12.21   0
  -4  -8   3    6.25   10.58   0
  -4   8   3    6.37   11.11   0
   4   8  -3    7.54    8.56   0
  -4  -8   3    7.10   10.45   0
   4  -8  -3   13.58   10.36   0
   2   8  -3  133.11    9.10   0
  -2  -8   3  128.55   12.76   0
   2  -8  -3  127.53    9.37   0
  -2   8   3  133.12   11.53   0
  -2  -8   3  126.53    8.97   0
   0  -8  -3  281.36    9.92   0
   0   8   3  274.77   10.29   0
   0  -8   3  247.23   13.77   0
   0  -8   3  263.13    9.56   0
   0   8  -3  279.62    9.62   0
   2  -8   3  281.57    9.55   0
   2  -8   3  256.63   13.69   0
  -2   8  -3  289.26    9.52   0
  -2  -8  -3  272.90    9.47   0
  -2  -8  -3  316.57   10.05   0
   2   8   3  300.18   11.99   0
  -4  -8  -3    4.26    8.46   0
   4   8   3    6.61    9.01   0
   4  -8   3    6.10    8.18   0
  -4  -8  -3    8.58    8.96   0
  -4   8  -3    2.14    8.36   0
   6   8   3   14.69    8.94   0
  -6   8  -3   12.84   10.10   0
  -6  -8  -3   23.68    8.84   0
  -6  -8  -3   13.64    8.66   0
   6  -8   3   11.50   12.40   0
   8  -8   3  310.46   14.07   0
  -8   8  -3  291.64    9.50   0
   8   8   3  323.03   10.45   0
  -8  -8  -3  350.48   10.43   0
  -8  -8  -3  289.58    9.88   0
  10   8   3  163.70    9.96   0
  10   8   3  136.99    9.46   0
 -10  -8  -3  125.63    9.42   0
  10  -8   3  136.67   13.18   0
 -10   8  -3  130.68    9.10   0
 -10  -8  -3  160.77   11.99   0
  12   8   3  203.11   10.07   0
  12  -8   3  179.91   11.91   0
 -12  -8  -3  174.62   10.34   0
  12   8   3  163.20    9.91   0
 -12  -8  -3  216.42   12.20   0
 -12   8  -3  211.42    9.97   0
 -12   8  -3  167.94   11.44   0
  14   8   3  205.39   10.30   0
  14  -8   3  182.64   12.46   0
 -14  -8  -3  167.04   10.25   0
  14   8   3  165.08   10.14   0
 -14  -8  -3  207.61   10.47   0
 -14   8  -3  218.00   12.07   0
 -14   8  -3  170.97    9.76   0
 -16   8  -3    9.99   11.87   0
  16   8   3   -9.13   12.19   0
 -16  -8  -3    2.91   10.06   0
  16   8   3    7.50   12.44   0
 -16  -8  -3    5.78   10.12   0
 -16   8  -3    5.84    9.85   0
  16  -8   3    1.48   10.10   0
 -18   8  -3   31.84   12.92   0
  18   8   3   12.34   10.92   0
 -18  -8  -3   30.55   13.49   0
 -18   8  -3   34.44   10.61   0
  18  -8   3   21.19   13.22   0
 -18  -8  -3   23.96   10.64   0
  18   8   3   36.12   10.85   0
 -20  -8  -3    5.73   11.84   0
 -20  -8  -3   20.67   13.96   0
  20   8   3    5.34   11.24   0
 -20   8  -3    7.86   11.21   0
  20  -8   3    6.61   11.70   0
 -20   8  -3    6.97   11.24   0
  20   8   3   18.57   13.89   0
 -21  -9   3    5.45   11.63   0
  21   9  -3    7.24   11.75   0
 -21  -9   3   -0.17   14.84   0
 -21   9   3    6.43   18.33   0
  21   9  -3   15.59   13.69   0
 -21   9   3   11.05   18.95   0
  21  -9  -3    6.68   11.67   0
 -19  -9   3   11.53   10.71   0
 -19   9   3    5.92   18.59   0
  19   9  -3   16.89   11.26   0
 -19  -9   3    4.12   11.32   0
  19   9  -3   -4.75   12.95   0
 -19   9   3    4.81   17.71   0
  19  -9  -3    3.84   10.61   0
 -17   9   3   77.32   15.54   0
  17   9  -3   65.95   10.24   0
 -17   9   3   61.61   16.91   0
 -17  -9   3   59.31   13.51   0
  17   9  -3   76.18   11.27   0
  17  -9  -3   81.77   12.71   0
 -17  -9   3   63.30   12.91   0
 -15  -9   3    7.07    9.82   0
 -15   9   3    4.62   16.02   0
  15   9  -3    8.47   10.34   0
 -15   9   3    2.38   13.96   0
  15   9  -3    1.87    9.62   0
  15  -9  -3    1.57    9.46   0
 -15  -9   3   -5.16   10.31   0
  13   9  -3   55.32    9.71   0
 -13  -9   3   57.41   11.76   0
 -13   9   3   63.96   15.50   0
  13   9  -3   77.20   10.46   0
 -13  -9   3   65.22   10.44   0
 -13   9   3   74.06   13.73   0
  13  -9  -3   58.88    9.65   0
 -11  -9   3   34.98   11.22   0
  11  -9  -3   40.73    8.91   0
 -11  -9   3   24.57    9.52   0
  11   9  -3   33.59   11.10   0
  11   9  -3   45.40   12.04   0
 -11   9   3   31.50   13.78   0
  -9  -9   3   15.66    9.05   0
   9   9  -3   17.95    9.43   0
  -9   9   3   11.42   13.09   0
   9   9  -3   10.03   10.71   0
  -9  -9   3    8.99    9.48   0
   7   9  -3  368.94   12.51   0
  -7  -9   3  317.30   10.45   0
   7  -9  -3  310.76   13.98   0
  -7  -9   3  357.42   10.38   0
  -7   9   3  349.12   15.01   0
   7   9  -3  313.26   10.27   0
   5  -9  -3   49.63   10.81   0
  -5  -9   3   45.57    8.86   0
  -5   9   3   55.15   11.51   0
  -5  -9   3   57.61    9.02   0
   5   9  -3   65.58    9.25   0
  -3  -9   3   87.53   11.05   0
  -3   9   3  106.66   11.55   0
  -3  -9   3   87.03   11.25   0
   3  -9  -3   93.34   10.94   0
   3   9  -3  103.71    9.26   0
  -1  -9   3   46.75   10.90   0
   1   9  -3   51.96    9.01   0
  -1  -9   3   55.50    8.85   0
   1  -9  -3   60.09   10.63   0
  -1   9   3   52.70   11.10   0
   1   9   3  113.94    9.66   0
   1  -9   3   89.50   11.31   0
  -1  -9  -3   96.39   10.56   0
  -1  -9  -3  109.56    9.31   0
   1  -9   3  102.79   10.73   0
  -1   9  -3  106.35    8.99   0
  -3  -9  -3   37.80    9.05   0
   3   9   3   29.56    9.26   0
  -3   9  -3   36.20    8.62   0
  -3  -9  -3   25.91    8.33   0
   3  -9   3   23.36   10.83   0
   3  -9   3   25.75    8.48   0
   5  -9   3    6.76    8.37   0
  -5  -9  -3   18.16    8.84   0
   5   9   3   14.45   11.13   0
  -5   9  -3    9.74    8.38   0
  -5  -9  -3   14.71   10.88   0
  -7   9  -3    4.98    8.53   0
  -7  -9  -3   10.13    8.94   0
   7  -9   3    3.75   12.53   0
  -7  -9  -3    9.71    9.56   0
   7   9   3    6.61    9.19   0
  -9   9  -3  448.65   10.42   0
   9   9   3  555.11   11.25   0
   9  -9   3  493.47   13.44   0
  -9  -9  -3  476.96   10.69   0
  -9  -9  -3  551.76   11.22   0
 -11  -9  -3   55.15    9.69   0
  11  -9   3   60.56   13.31   0
 -11   9  -3   46.11   11.12   0
  11   9   3   58.16   12.23   0
 -11  -9  -3   59.09   10.01   0
  13   9   3  370.38   10.90   0
 -13   9  -3  305.37   12.36   0
  13   9   3  314.63   10.91   0
 -13  -9  -3  319.78   11.08   0
 -13   9  -3  418.54   10.78   0
 -13  -9  -3  425.13   11.20   0
  13  -9   3  352.43   13.18   0
  15   9   3   10.77   10.34   0
  15  -9   3   21.63   12.24   0
 -15  -9  -3   17.12   10.34   0
  15   9   3    8.01   10.39   0
 -15  -9  -3   26.27   10.40   0
 -15   9  -3   27.49   11.85   0
 -15   9  -3   21.59   11.94   0
  17  -9   3   92.22   13.63   0
 -17  -9  -3   82.61   13.44   0
  17   9   3  105.55   13.53   0
  17   9   3   78.44   11.14   0
 -17  -9  -3  105.96   11.33   0
 -17   9  -3   97.99   13.16   0
 -17   9  -3   84.86   10.69   0
 -19  -9  -3  -15.93   11.45   0
  19  -9   3   10.37   14.16   0
  19   9   3    7.19   11.42   0
 -19  -9  -3   18.44   11.54   0
  19   9   3   17.95   11.46   0
 -19   9  -3    6.14   11.36   0
 -19   9  -3   10.32   11.16   0
  20 -10  -3    9.09   11.72   0
 -20 -10   3   30.09   11.87   0
 -20  10   3   13.54   19.82   0
 -20 -10   3   -1.23   12.24   0
  20  10  -3   12.21   11.65   0
 -20  10   3   -1.12   19.27   0
  20  10  -3   16.54   12.05   0
 -18  10   3  264.99   17.69   0
 -18 -10   3  254.06   11.92   0
 -18 -10   3  246.11   15.06   0
  18  10  -3  248.25   11.40   0
  18  10  -3  309.81   15.05   0
 -18  10   3  310.50   18.03   0
  18 -10  -3  272.80   11.87   0
 -16  10   3   -2.60   15.17   0
  16  10  -3    3.56   13.30   0
 -16 -10   3   17.97   13.23   0
 -16 -10   3   -1.00   12.59   0
  16  10  -3    5.71   10.10   0
 -16  10   3    1.49   14.81   0
  16 -10  -3   10.51   12.41   0
 -14  10   3  555.42   17.70   0
 -14 -10   3  591.24   12.66   0
  14  10  -3  530.73   13.76   0
  14  10  -3  612.22   14.63   0
  14 -10  -3  562.20   13.49   0
 -14  10   3  649.29   17.48   0
 -14 -10   3  544.20   11.82   0
 -12  10   3    2.63   13.67   0
  12 -10  -3    2.58    9.20   0
 -12 -10   3    4.07    9.97   0
  12  10  -3    7.10    9.59   0
 -12 -10   3   -0.91    9.70   0
  12  10  -3   -0.16   10.17   0
 -12  10   3    9.35   14.12   0
 -10 -10   3 1164.04   13.50   0
  10  10  -3 1300.94   13.88   0
  10  10  -3 1085.68   15.03   0
 -10  10   3 1197.58   18.40   0
 -10 -10   3 1104.37   13.44   0
  -8 -10   3   39.34    9.31   0
   8 -10  -3   44.12   13.09   0
  -8 -10   3   48.13    9.48   0
   8  10  -3   44.85   10.99   0
   8  10  -3   52.76    9.73   0
  -8  10   3   39.87   12.00   0
  -6 -10   3  598.60   13.80   0
  -6  10   3  701.29   15.02   0
  -6 -10   3  650.95   11.53   0
   6  10  -3  709.27   11.65   0
   6 -10  -3  654.56   14.19   0
  -4 -10   3   41.53    9.29   0
  -4  10   3   46.07   11.56   0
   4 -10  -3   37.31   10.88   0
  -4 -10   3   40.72   11.11   0
   4  10  -3   51.49    9.27   0
   2  10  -3  132.76    9.54   0
  -2 -10   3  124.79    9.51   0
  -2 -10   3  108.44   11.57   0
  -2  10   3  125.57    9.95   0
   2 -10  -3  118.12    9.37   0
   0 -10  -3  668.99   12.05   0
   0  10   3  722.44   12.72   0
   0 -10   3  559.06   15.74   0
   0 -10  -3  557.93   12.41   0
   0  10  -3  626.79   11.14   0
   0 -10   3  662.61   11.13   0
   2 -10   3  205.79    9.58   0
  -2 -10  -3  212.62    9.83   0
  -2  10  -3  211.25   11.66   0
   2  10   3  217.71   12.26   0
   2 -10   3  177.84   12.12   0
  -2 -10  -3  189.69    9.52   0
  -4 -10  -3  161.12    9.65   0
  -4 -10  -3  182.47    9.87   0
  -4  10  -3  167.21    9.26   0
   4  10   3  192.52   10.15   0
   4 -10   3  153.46   13.41   0
   4 -10   3  171.52    9.36   0
   6  10   3  323.39   10.71   0
  -6 -10  -3  305.97   10.43   0
  -6 -10  -3  257.30   10.04   0
  -6  10  -3  250.86    9.90   0
   6 -10   3  272.83   12.71   0
  -8 -10  -3   -7.56    9.23   0
   8  10   3    4.66    9.57   0
   8 -10   3    2.63   12.90   0
  -8  10  -3   -0.93   11.17   0
  -8 -10  -3    4.18    9.34   0
  10 -10   3  160.45   12.26   0
  10  10   3  173.83   10.57   0
 -10 -10  -3  163.04   10.04   0
 -10 -10  -3  161.03   10.52   0
 -10  10  -3  155.73    9.79   0
  12 -10   3   54.16   11.96   0
 -12 -10  -3   41.36   10.24   0
  12  10   3   47.21   10.24   0
 -12  10  -3   50.02    9.49   0
 -12 -10  -3   56.91   12.72   0
  14 -10   3  124.30   12.89   0
 -14 -10  -3  136.01   10.79   0
  14  10   3  123.96   13.04   0
 -14  10  -3  115.24   12.63   0
 -14  10  -3  139.77   10.59   0
 -14 -10  -3  137.22   10.83   0
  14  10   3  151.00   10.79   0
 -16 -10  -3  113.44   11.32   0
  16 -10   3  107.69   11.49   0
 -16  10  -3  103.27   13.00   0
  16  10   3  137.41   13.61   0
 -16  10  -3  131.35   13.57   0
  16  10   3   85.73   11.26   0
 -16 -10  -3  127.02   11.34   0
  18 -10   3   35.73   14.20   0
  18  10   3   60.21   11.56   0
 -18  10  -3   40.35   13.69   0
  18  10   3   56.32   11.74   0
 -18 -10  -3   42.17   11.70   0
 -18 -10  -3   45.88   11.94   0
 -18  10  -3   43.12   11.43   0
  19 -11  -3   95.34   14.56   0
 -19  11   3  129.96   20.34   0
 -19  11   3  100.19   20.34   0
 -19 -11   3  121.72   12.52   0
  19  11  -3  123.36   12.52   0
  19  11  -3   97.18   14.43   0
 -19 -11   3  104.92   14.64   0
 -17 -11   3   32.45   11.15   0
 -17 -11   3   45.78   11.48   0
  17  11  -3   43.00   13.72   0
  17  11  -3   40.84   14.04   0
 -17  11   3   44.92   16.27   0
 -17  11   3   40.72   18.67   0
  17 -11  -3   44.32   11.13   0
 -15  11   3  151.74   16.65   0
 -15 -11   3  148.07   13.43   0
  15 -11  -3  151.88   13.30   0
  15  11  -3  172.05   11.55   0
 -15 -11   3  149.48   11.71   0
  15  11  -3  155.04   11.07   0
 -15  11   3  191.00   16.08   0
 -13 -11   3  144.83   10.47   0
  13  11  -3  158.11   11.18   0
 -13  11   3  140.37   15.66   0
  13  11  -3  152.73   10.44   0
 -13  11   3  168.19   15.11   0
  13 -11  -3  147.31   12.67   0
 -13 -11   3  138.29   11.05   0
 -11 -11   3   -1.86    9.95   0
  11  11  -3   14.75   10.26   0
 -11 -11   3    2.24   10.36   0
  11  11  -3   -1.04   12.17   0
 -11  11   3    4.62   14.56   0
  -9 -11   3  126.43   12.31   0
   9  11  -3  126.13   12.52   0
  -9 -11   3  131.89   10.29   0
   9  11  -3  123.50    9.91   0
  -9  11   3  138.57   13.10   0
  -7 -11   3    0.69   11.84   0
   7 -11  -3    2.44   11.27   0
   7  11  -3    8.35    9.79   0
  -7  11   3   10.47   12.03   0
  -7 -11   3   -0.49    9.66   0
   5 -11  -3   43.38   11.42   0
  -5  11   3   51.01   12.06   0
   5  11  -3   42.88    9.75   0
  -5 -11   3   34.71    9.65   0
  -5 -11   3   24.60   11.82   0
  -3 -11   3  283.79   10.34   0
  -3 -11   3  281.31   12.46   0
  -3  11   3  365.93   13.19   0
   3 -11  -3  308.47   12.45   0
   3  11  -3  308.89   10.38   0
  -1 -11   3   27.14   11.38   0
   1  11  -3   27.20    9.26   0
  -1 -11   3   42.49    9.28   0
  -1  11   3   31.05    9.79   0
   1 -11  -3   29.07    9.34   0
   1  11   3  775.73   12.85   0
  -1  11  -3  744.64   11.56   0
  -1 -11  -3  726.79   12.14   0
   1 -11   3  657.96   14.59   0
  -1 -11  -3  660.78   11.29   0
   1 -11   3  712.45   11.41   0
  -3 -11  -3   20.12    9.42   0
   3 -11   3   11.91    8.90   0
  -3 -11  -3   20.42    9.01   0
   3 -11   3   16.68   13.05   0
   3  11   3   18.31    9.71   0
  -3  11  -3   23.63    8.99   0
  -5 -11  -3  371.36   10.88   0
   5  11   3  375.10   12.70   0
  -5  11  -3  333.74   10.49   0
  -5 -11  -3  316.70   10.18   0
   5 -11   3  331.87   10.12   0
   7  11   3    7.90    9.94   0
  -7 -11  -3    6.15    9.71   0
   7 -11   3    7.18   13.31   0
  -7 -11  -3    7.29   11.67   0
  -7  11  -3    0.85    9.02   0
   9  11   3  228.98   10.68   0
  -9  11  -3  181.13    9.97   0
  -9 -11  -3  172.32   10.28   0
   9 -11   3  193.74   12.76   0
  -9 -11  -3  210.30   10.71   0
  11  11   3    6.36   10.34   0
  11 -11   3    6.38   11.98   0
 -11  11  -3    0.57    9.68   0
 -11 -11  -3    8.52   10.61   0
 -11 -11  -3    1.98   10.03   0
 -13 -11  -3  192.83   11.47   0
 -13  11  -3  193.05   12.67   0
  13  11   3  218.86   11.34   0
 -13  11  -3  260.85   11.16   0
  13 -11   3  209.28   15.45   0
 -13 -11  -3  228.15   13.70   0
 -15  11  -3    5.73   10.46   0
 -15 -11  -3   13.29   11.04   0
  15  11   3   -3.22   10.89   0
 -15  11  -3   17.46   13.11   0
  15 -11   3   -1.58   13.47   0
 -15 -11  -3   13.87   11.40   0
  17 -11   3  217.05   15.07   0
 -17  11  -3  186.53   14.32   0
 -17 -11  -3  220.24   12.26   0
  17  11   3  183.57   12.12   0
 -17  11  -3  265.25   12.34   0
 -17 -11  -3  232.31   15.08   0
  17  11   3  244.58   12.52   0
 -16 -12   3    0.52   13.92   0
  16  12  -3    7.02   11.29   0
  16  12  -3   12.56   11.87   0
 -16 -12   3   27.31   11.90   0
 -16  12   3    7.18   16.26   0
  16 -12  -3   12.77   11.36   0
 -16  12   3    4.37   16.81   0
 -14 -12   3   17.39   11.32   0
  14  12  -3   20.24   11.09   0
  14  12  -3    1.87   13.47   0
 -14  12   3   15.69   15.17   0
 -14 -12   3    8.90   11.35   0
 -14  12   3   16.17   16.04   0
  14 -12  -3    8.28   10.59   0
  12 -12  -3   -0.25   10.35   0
 -12 -12   3   -2.80   10.47   0
  12  12  -3    3.17   11.36   0
 -12 -12   3   22.57   10.92   0
  12  12  -3    1.44   13.07   0
 -12  12   3    1.86   13.30   0
 -10 -12   3   30.64   10.47   0
  10  12  -3   62.64   10.50   0
 -10 -12   3   50.55   10.50   0
 -10  12   3   39.42   13.19   0
   8  12  -3   33.10   10.49   0
  -8  12   3   27.38   12.62   0
  -8 -12   3   20.59   12.56   0
  -8 -12   3   26.94   10.47   0
   8 -12  -3   24.00   12.17   0
  -6 -12   3  252.52   13.18   0
  -6  12   3  283.75   13.61   0
   6  12  -3  287.52   10.84   0
   6 -12  -3  252.37   12.88   0
  -6 -12   3  252.56   10.82   0
  -4  12   3   27.12   12.23   0
  -4 -12   3    9.12   11.82   0
  -4 -12   3   19.79   11.84   0
   4 -12  -3   28.40    9.55   0
   4  12  -3   30.40    9.76   0
  -2 -12   3  372.48   10.96   0
  -2  12   3  436.28   11.86   0
  -2 -12   3  363.04   13.37   0
   2 -12  -3  400.51   13.27   0
   2  12  -3  389.81   11.01   0
   0  12   3   69.77   12.47   0
   0 -12   3   56.41   13.88   0
   0 -12  -3   58.59    9.87   0
   0 -12  -3   55.69    9.25   0
   0 -12   3   61.58   11.87   0
   0  12  -3   74.36    9.99   0
   2 -12   3  142.49    9.94   0
  -2  12  -3  151.25    9.83   0
   2  12   3  164.82   10.84   0
   2 -12   3  133.68   14.30   0
  -2 -12  -3  119.29    9.73   0
  -2 -12  -3  145.51   10.28   0
  -4  12  -3   90.36   11.67   0
   4  12   3   97.74   12.63   0
   4 -12   3   75.17    9.46   0
  -4 -12  -3   83.46    9.52   0
   4 -12   3   83.28   12.24   0
  -4 -12  -3   89.90   12.26   0
  -6 -12  -3   74.57   12.41   0
  -6  12  -3   55.60   11.88   0
   6 -12   3   59.17   11.80   0
   6  12   3   67.40   10.48   0
  -6 -12  -3   57.82    9.74   0
   8  12   3   39.50   10.48   0
  -8 -12  -3   22.53    9.81   0
   8 -12   3   19.87   12.42   0
  -8 -12  -3   15.22   12.56   0
  -8  12  -3   21.71    9.80   0
 -10 -12  -3   23.34   10.79   0
 -10 -12  -3   37.07   10.39   0
 -10  12  -3   20.06   10.15   0
  10 -12   3   31.04   14.42   0
  10  12   3   55.71   10.80   0
 -12 -12  -3   -0.83   13.13   0
  12 -12   3   17.86   13.07   0
  12  12   3   11.92   10.98   0
 -12  12  -3   13.48   10.54   0
 -12 -12  -3    9.64   10.84   0
 -14 -12  -3   21.88   11.24   0
  14  12   3   37.62   11.36   0
  14 -12   3   34.13   13.96   0
 -14  12  -3   42.87   11.13   0
 -14  12  -3   28.90   11.01   0
 -14 -12  -3   33.42   13.93   0
  16 -12   3   22.42   14.41   0
  16  12   3    3.40   14.70   0
 -16  12  -3   25.10   14.17   0
 -16 -12  -3   26.87   11.52   0
 -16  12  -3   11.21   11.43   0
 -16 -12  -3    8.40   12.11   0
  15 -13  -3   20.50   14.17   0
 -15 -13   3    7.30   11.86   0
 -15 -13   3   13.16   12.36   0
  15  13  -3    8.02   11.98   0
  15  13  -3   13.46   14.49   0
 -15  13   3   15.73   16.57   0
 -15  13   3    9.48   17.46   0
 -13 -13   3   21.48   13.79   0
  13  13  -3   21.40   11.61   0
 -13 -13   3   14.13   11.69   0
 -13  13   3   17.19   16.60   0
  13 -13  -3   17.71   13.46   0
 -11 -13   3   20.01   13.41   0
  11  13  -3    6.05   11.38   0
 -11 -13   3    4.80   13.65   0
 -11  13   3    3.43   16.03   0
  -9 -13   3   45.19   10.98   0
  -9 -13   3   53.89   13.41   0
   9  13  -3   41.69   10.85   0
  -9  13   3   52.47   13.57   0
  -7 -13   3   15.10   12.81   0
   7 -13  -3    1.75   12.32   0
  -7  13   3   -0.55   13.00   0
   7  13  -3    2.36   10.62   0
  -7 -13   3   -3.90   10.57   0
  -5 -13   3  100.06   12.87   0
  -5  13   3  111.00   13.04   0
   5 -13  -3  100.17   10.51   0
  -5 -13   3  111.08   10.52   0
   5  13  -3  100.33   10.64   0
   3 -13  -3    7.19   12.16   0
  -3 -13   3    0.91   12.32   0
  -3  13   3   13.63   10.42   0
  -3 -13   3   10.27   10.31   0
   3  13  -3    9.19   12.38   0
  -1  13   3   68.62   13.21   0
  -1 -13   3   65.12   10.18   0
   1 -13  -3   51.20    9.66   0
   1  13  -3   63.04   10.13   0
   1 -13  -3   45.10   12.30   0
  -1 -13   3   52.80   12.51   0
   1  13   3  109.83   13.26   0
   1 -13   3   89.92   12.77   0
  -1 -13  -3   86.11   10.47   0
  -1 -13  -3   88.80   11.97   0
   1 -13   3  100.56   10.11   0
  -1  13  -3  104.37   10.18   0
  -3  13  -3   -2.36    9.53   0
   3  13   3    2.51   10.47   0
  -3 -13  -3    5.43   10.11   0
   3 -13   3    4.06   12.30   0
  -3 -13  -3   12.41   11.66   0
   3 -13   3   -7.75   11.88   0
  -5  13  -3  177.98   10.73   0
  -5 -13  -3  183.40   10.84   0
   5 -13   3  170.69   12.69   0
  -5 -13  -3  152.31   10.37   0
   5 -13   3  144.32   13.27   0
   5  13   3  184.02   11.37   0
  -7 -13  -3   21.64   12.97   0
   7  13   3    7.92   13.56   0
  -7  13  -3   13.66   12.23   0
  -7 -13  -3   17.64   10.42   0
   7 -13   3   13.71   14.69   0
  -9  13  -3    3.50   10.23   0
  -9 -13  -3    5.47   10.41   0
   9  13   3    1.97   10.72   0
   9 -13   3   11.57   13.28   0
  -9 -13  -3    7.58   11.11   0
  11 -13   3   27.24   13.67   0
 -11  13  -3   15.60   13.19   0
 -11 -13  -3   23.11   10.85   0
  11  13   3   18.55   11.07   0
 -11 -13  -3    8.39   11.49   0
  13  13   3  122.85   11.87   0
 -13 -13  -3  107.69   14.51   0
  13 -13   3  112.78   14.70   0
 -13  13  -3  112.45   11.38   0
 -13 -13  -3   96.16   11.87   0
  15 -13   3   -3.72   14.80   0
  15  13   3   12.01   12.08   0
 -15 -13  -3   -0.33   15.03   0
 -15  13  -3    1.04   11.86   0
 -15  13  -3   -0.75   11.73   0
 -15 -13  -3   -5.81   12.07   0
 -14 -14   3   92.08   12.52   0
  14  14  -3  128.78   12.63   0
 -12 -14   3   46.34   14.35   0
  12  14  -3   56.07   12.43   0
 -12 -14   3   63.22   14.94   0
 -12  14   3   59.46   17.37   0
  12 -14  -3   67.46   13.77   0
 -10 -14   3  142.59   14.61   0
  10  14  -3  180.54   12.22   0
 -10  14   3  148.54   17.07   0
 -10 -14   3  150.84   12.05   0
  -8  14   3    9.98   13.84   0
  -8 -14   3   11.64   11.36   0
   8  14  -3   23.14   11.17   0
  -8 -14   3    0.46   11.31   0
   8 -14  -3   10.10   13.39   0
  -6 -14   3  171.60   11.55   0
  -6 -14   3  166.51   14.07   0
   6 -14  -3  169.09   13.77   0
  -6  14   3  188.66   14.52   0
   6  14  -3  205.30   11.57   0
  -4 -14   3    3.31   13.17   0
   4 -14  -3    0.83   12.58   0
  -4  14   3    4.75   10.82   0
   4  14  -3   12.71   12.94   0
  -4 -14   3   -2.29   12.98   0
  -2 -14   3  545.26   15.22   0
  -2  14   3  656.73   13.68   0
  -2 -14   3  570.06   12.27   0
   2 -14  -3  523.06   14.03   0
   2  14  -3  599.23   12.16   0
   2 -14  -3  546.56   14.73   0
   0 -14   3    7.23   13.06   0
   0 -14  -3    8.67   10.15   0
   0  14   3   11.07   11.15   0
   0  14  -3    9.17   10.41   0
   0 -14  -3    7.26   10.36   0
   0 -14   3   -3.87   12.62   0
  -2  14  -3 1037.77   15.63   0
   2  14   3 1145.86   14.79   0
   2 -14   3  917.26   17.01   0
  -2 -14  -3  890.51   13.21   0
  -2 -14  -3  991.38   16.04   0
   2 -14   3  992.23   15.49   0
  -4  14  -3    5.46   10.38   0
   4 -14   3    5.62   10.11   0
  -4 -14  -3    5.39   10.59   0
  -4 -14  -3   13.81   12.71   0
   4 -14   3    3.32   12.94   0
   4  14   3    6.40   11.23   0
  -6  14  -3  298.67   13.91   0
   6  14   3  360.55   12.29   0
   6 -14   3  288.28   13.83   0
  -6 -14  -3  319.54   14.36   0
   6 -14   3  267.73   14.29   0
  -6 -14  -3  257.29   11.53   0
   8  14   3   75.23   11.41   0
  -8 -14  -3   54.54   13.61   0
  -8  14  -3   48.52   13.26   0
  -8 -14  -3   48.23   10.85   0
   8 -14   3   36.74   15.92   0
   8 -14   3   54.95   13.85   0
 -10 -14  -3   21.32   11.52   0
  10  14   3   24.46   11.73   0
 -10 -14  -3   25.25   11.13   0
 -10  14  -3   10.14   13.88   0
  10 -14   3   19.52   13.90   0
 -12 -14  -3   79.85   12.24   0
 -12 -14  -3   78.62   11.97   0
 -12  14  -3   63.10   11.66   0
  12  14   3   57.13   12.08   0
  12 -14   3   66.65   14.87   0
 -11 -15   3  119.71   15.58   0
 -11  15   3  143.62   18.18   0
 -11 -15   3  133.15   12.82   0
  11  15  -3  147.39   15.68   0
  -9 -15   3   -0.86   14.59   0
  -9  15   3    1.08   14.97   0
   9  15  -3   -3.65   12.02   0
  -9 -15   3   -7.90   11.98   0
  -7 -15   3  339.01   12.54   0
  -7 -15   3  307.15   13.02   0
  -7  15   3  345.38   15.70   0
   7  15  -3  361.58   12.60   0
   7 -15  -3  308.16   15.15   0
  -5  15   3   53.66   14.48   0
  -5 -15   3   43.71   11.36   0
  -5 -15   3   60.91   14.32   0
   5 -15  -3   54.23   13.78   0
   5  15  -3   63.72   11.45   0
  -3 -15   3  181.84   11.79   0
  -3  15   3  211.14   14.87   0
  -3 -15   3  163.46   14.43   0
   3 -15  -3  181.74   13.80   0
   3  15  -3  188.87   11.75   0
   3 -15  -3  170.60   11.78   0
   1 -15  -3   93.64   13.74   0
  -1 -15   3   85.34   14.24   0
  -1  15   3  121.30   14.41   0
   1 -15  -3   95.15   13.40   0
  -1 -15   3  106.77   11.22   0
   1  15  -3  100.97   13.53   0
   1 -15   3  124.17   11.55   0
   1  15   3  134.73   11.82   0
   1 -15   3  107.52   14.33   0
  -1 -15  -3  116.31   13.47   0
  -1 -15  -3  126.69   11.57   0
  -1  15  -3  123.50   10.96   0
   3 -15   3    8.85   13.69   0
  -3 -15  -3    6.26   13.26   0
  -3 -15  -3   15.36   13.43   0
  -3  15  -3    6.65   13.34   0
   3 -15   3    4.89   11.00   0
   3  15   3    0.15   11.49   0
   5  15   3  364.41   13.10   0
  -5 -15  -3  319.69   14.26   0
  -5 -15  -3  358.38   15.09   0
   5 -15   3  284.23   15.25   0
  -5  15  -3  346.57   12.15   0
   5 -15   3  299.15   12.08   0
   7 -15   3   -9.41   16.24   0
  -7  15  -3    4.36   11.14   0
   7  15   3    5.08   11.61   0
  -7 -15  -3    0.19   11.75   0
  -7 -15  -3   12.83   13.48   0
   7 -15   3    2.76   14.11   0
  -9  15  -3  315.96   15.15   0
  -9 -15  -3  356.00   15.98   0
  -9 -15  -3  254.97   12.59   0
   9  15   3  405.01   13.25   0
   9 -15   3  258.53   15.70   0
   9 -15   3  333.22   15.96   0
  -6 -16   3  169.55   15.73   0
  -6 -16   3  191.05   12.46   0
   6 -16  -3  165.37   15.22   0
   6  16  -3  198.39   12.83   0
  -6  16   3  198.54   16.00   0
   4  16  -3   36.47   11.89   0
  -4  16   3   37.41   12.61   0
   4 -16  -3   38.25   11.54   0
  -4 -16   3   24.91   11.94   0
   4 -16  -3   32.02   14.49   0
  -4 -16   3   32.36   14.87   0
   2 -16  -3  136.31   12.28   0
  -2 -16   3  131.10   14.82   0
  -2  16   3  151.95   15.55   0
   2 -16  -3  126.40   14.29   0
  -2 -16   3  132.78   14.61   0
   2  16  -3  172.78   14.90   0
   0 -16   3    5.88   11.53   0
   0  16   3   15.14   12.21   0
   0 -16   3   17.71   14.78   0
   0 -16  -3    8.26   11.46   0
   0  16  -3   12.25   11.33   0
   0 -16  -3    2.63   14.31   0
   2  16   3   43.33   14.81   0
   2 -16   3   30.88   14.74   0
  -2 -16  -3   37.11   11.32   0
   2 -16   3   38.89   14.44   0
  -2 -16  -3   37.43   14.67   0
  -2  16  -3   30.84   11.77   0
   4  16   3   35.08   12.38   0
   4 -16   3   28.61   11.82   0
  -4 -16  -3   22.24   14.09   0
  -4  16  -3   42.41   11.81   0
   4 -16   3   32.62   14.72   0
  -4 -16  -3   34.54   12.11   0
   6  16   3   38.18   12.59   0
  -6 -16  -3   20.05   11.82   0
  -6 -16  -3   31.39   12.18   0
   6 -16   3   21.40   17.31   0
  -6  16  -3   26.81   11.96   0
   6 -16   3   21.93   15.02   0
  24   0  -4  188.60   11.82   0
  24   0  -4  221.93   14.97   0
 -24   0   4  201.92   11.96   0
 -24   0   4  203.85   16.33   0
  22   0  -4   83.34   10.76   0
 -22   0   4   92.14   10.86   0
  22   0  -4  106.34   13.28   0
 -22   0   4   99.43   14.27   0
  20   0  -4  211.28   10.36   0
 -20   0   4  213.13   10.47   0
  20   0  -4  252.32   13.08   0
 -20   0   4  218.73   14.06   0
  18   0  -4  516.58   10.90   0
 -18   0   4  534.54   15.07   0
  18   0  -4  604.08   14.34   0
 -18   0   4  529.52   11.01   0
 -16   0   4  375.13    9.94   0
  16   0  -4  373.28    9.87   0
  16   0  -4  430.40   13.33   0
 -16   0   4  400.99   14.24   0
  14   0  -4 1715.25   19.09   0
 -14   0   4 1549.52   20.24   0
 -14   0   4 1487.31   13.27   0
  14   0  -4 1448.03   14.56   0
 -12   0   4 1258.56   19.27   0
 -12   0   4 1121.85   13.69   0
  12   0  -4 1370.68   18.20   0
  12   0  -4 1107.26   12.46   0
  10   0  -4 3420.65   27.96   0
 -10   0   4 2844.16   17.44   0
 -10   0   4 3003.69   26.02   0
  10   0  -4 2728.47   17.19   0
   8   0  -4 3400.13   31.67   0
  -8   0   4 3331.51   28.21   0
   8   0  -4 3072.13   19.27   0
   6   0  -4  542.30   11.20   0
  -6   0   4  505.50   16.07   0
   6   0  -4  600.91   17.17   0
   4   0  -4 2300.34   25.12   0
   4   0  -4 2364.28   19.79   0
  -4   0   4 2215.61   24.04   0
   2   0  -4  223.18   11.90   0
   0   0  -4  756.66   14.56   0
  -2   0  -4  458.81   13.77   0
  -2   0  -4  609.56   13.33   0
  -4   0  -4 2753.21   23.35   0
   4   0   4 2865.22   24.41   0
   4   0   4 3622.34   21.37   0
  -4   0  -4 3709.01   20.95   0
  -6   0  -4 2349.39   20.35   0
   6   0   4 2422.38   20.74   0
   6   0   4 2863.60   18.39   0
  -6   0  -4 2910.02   18.60   0
   8   0   4 2506.73   18.86   0
  -8   0  -4 2701.83   20.25   0
   8   0   4 2897.98   17.71   0
  -8   0  -4 2960.68   18.05   0
 -10   0  -4 1240.26   14.76   0
  10   0   4 1114.23   13.35   0
 -10   0  -4 1439.94   13.29   0
  10   0   4 1447.02   13.15   0
  12   0   4  238.79   11.71   0
 -12   0  -4  251.16    9.51   0
  12   0   4  296.97    9.27   0
 -12   0  -4  313.48    9.68   0
 -14   0  -4  471.01   12.42   0
  14   0   4  463.54   12.46   0
  14   0   4  512.00   10.48   0
 -14   0  -4  553.00   10.74   0
 -16   0  -4   -8.42   11.25   0
 -16   0  -4    1.05    9.11   0
  16   0   4   -0.05    8.81   0
  16   0   4    5.90    9.24   0
 -18   0  -4  212.30   10.29   0
 -18   0  -4  264.94   12.62   0
  18   0   4  204.83   10.35   0
  18   0   4  231.00   10.21   0
 -20   0  -4   35.36   12.18   0
  20   0   4   26.97   10.28   0
 -20   0  -4   38.38   10.56   0
  20   0   4   57.54   12.44   0
 -22   0  -4  139.09   11.52   0
 -22   0  -4  143.37   11.71   0
  22   0   4  123.94   11.30   0
  22   0   4  143.85   11.11   0
  25  -1  -4   44.14   12.02   0
  25   1  -4   60.41   12.11   0
  25  -1  -4   56.61   14.62   0
  25   1  -4   55.78   12.05   0
 -25   1   4   51.51   16.31   0
 -25  -1   4   45.98   16.16   0
 -25  -1   4   52.65   12.27   0
 -23  -1   4   52.88   14.79   0
  23   1  -4   54.60   13.27   0
 -23   1   4   40.63   11.25   0
  23  -1  -4   39.07   11.03   0
  23  -1  -4   67.38   13.62   0
  23   1  -4   54.68   13.54   0
 -23  -1   4   46.79   13.81   0
 -23   1   4   41.09   15.04   0
  21  -1  -4   75.21    9.99   0
 -21   1   4   59.68   12.52   0
  21   1  -4   72.22   10.04   0
  21  -1  -4   85.97   12.45   0
 -21  -1   4   71.65   13.87   0
 -21   1   4   69.56   14.15   0
  21   1  -4   80.74   12.83   0
 -21  -1   4   82.99   10.39   0
  19   1  -4   18.77    9.45   0
  19  -1  -4   19.22    9.40   0
 -19  -1   4   11.64    9.63   0
  19  -1  -4   16.88   11.64   0
 -19   1   4   13.40    9.54   0
 -19   1   4   15.58   12.95   0
 -19  -1   4   17.73   12.81   0
  19   1  -4   17.56   11.82   0
  17  -1  -4  231.13    9.72   0
  17   1  -4  217.30    9.84   0
  17  -1  -4  265.35   12.66   0
 -17   1   4  251.78   13.89   0
  17   1  -4  245.25   12.36   0
 -17  -1   4  237.99   10.02   0
 -17  -1   4  243.23   13.47   0
 -17   1   4  226.60    9.80   0
  15   1  -4   43.08   10.87   0
 -15  -1   4   35.04   11.54   0
  15  -1  -4   34.97    8.75   0
  15   1  -4   39.96    8.48   0
 -15  -1   4   25.78   11.14   0
 -15   1   4   36.93   14.03   0
  15  -1  -4   38.08   12.64   0
 -15   1   4   43.92    8.71   0
  13  -1  -4  781.87   11.16   0
  13   1  -4  917.98   15.20   0
  13   1  -4  764.94   10.92   0
  13  -1  -4  942.04   17.26   0
 -13   1   4  733.83   10.89   0
 -13   1   4  835.93   17.74   0
 -13  -1   4  787.98   11.24   0
 -13  -1   4  814.01   15.37   0
  11   1  -4   39.11    8.19   0
  11   1  -4   52.94   10.94   0
 -11   1   4   43.22   12.75   0
  11  -1  -4   54.79   12.06   0
 -11  -1   4   47.87   10.93   0
  11  -1  -4   44.86    9.98   0
 -11  -1   4   48.52    8.39   0
  -9  -1   4 1414.56   14.97   0
   9  -1  -4 1675.87   25.26   0
  -9  -1   4 1472.37   18.57   0
  -9   1   4 1461.55   23.47   0
   9   1  -4 1609.18   19.32   0
   9  -1  -4 1341.16   13.68   0
   9   1  -4 1357.55   13.58   0
   7   1  -4   11.34    8.07   0
   7  -1  -4   12.65   15.42   0
  -7   1   4   15.23   14.50   0
  -7  -1   4   12.79    9.90   0
   7   1  -4   13.51   10.31   0
   7  -1  -4   15.96    8.05   0
  -7  -1   4   20.93    7.89   0
   5   1  -4 1672.39   17.72   0
   5   1  -4 1745.47   20.25   0
   5  -1  -4 1784.98   29.37   0
  -5  -1   4 1540.72   19.08   0
   5  -1  -4 1677.86   16.30   0
   3   1  -4  217.42   11.59   0
   3   1  -4  205.82   11.37   0
   3  -1  -4  208.92   13.51   0
   3  -1  -4  254.66   13.74   0
  -3  -1   4  192.48    9.75   0
   1  -1  -4  664.24   14.91   0
   1   1  -4  524.96   12.10   0
   1   1   4  994.95   14.72   0
  -1  -1  -4  997.87   14.77   0
  -3   1  -4  313.20   13.12   0
  -3  -1  -4  302.62   12.46   0
  -3   1  -4  420.06   10.45   0
   3   1   4  371.55   10.76   0
  -3  -1  -4  386.93   10.69   0
  -5   1  -4   18.18   10.23   0
  -5  -1  -4   13.28    8.24   0
   5  -1   4   18.54   11.52   0
   5   1   4   19.79    8.22   0
   5   1   4   22.76    8.21   0
  -5   1  -4   24.00    7.92   0
  -5  -1  -4   20.18    8.13   0
  -7   1  -4  813.79   14.55   0
  -7  -1  -4  738.06   12.41   0
   7  -1   4  741.45   13.15   0
   7   1   4  730.44   12.14   0
  -7  -1  -4  920.29   12.14   0
   7   1   4  886.05   13.39   0
  -7   1  -4 1015.27   12.38   0
  -9  -1  -4  223.45   11.22   0
   9  -1   4  218.66   11.07   0
  -9  -1  -4  257.45    9.54   0
   9   1   4  233.80    9.29   0
  -9   1  -4  239.37    9.78   0
   9   1   4  258.81    9.25   0
  -9   1  -4  267.46    9.36   0
 -11  -1  -4  856.12   11.50   0
 -11   1  -4  745.30   11.86   0
 -11  -1  -4  786.38   13.27   0
  11  -1   4  766.21   12.17   0
  11   1   4  716.89   13.20   0
  11  -1   4  861.00   11.50   0
  11   1   4  821.20   12.64   0
 -11   1  -4  867.28   13.07   0
 -13   1  -4   14.32    8.43   0
 -13  -1  -4   14.30    8.80   0
  13   1   4   14.21   10.49   0
  13  -1   4   23.77    8.78   0
 -13   1  -4   16.54    8.48   0
 -13  -1  -4   13.09    8.80   0
  13  -1   4   22.21    8.18   0
  13   1   4   22.17    8.70   0
 -15   1  -4   52.05    8.92   0
 -15  -1  -4   46.18    9.27   0
  15  -1   4   47.51   11.07   0
  15   1   4   44.45   11.22   0
 -15   1  -4   45.09    9.03   0
  15  -1   4   65.39    8.91   0
 -15  -1  -4   64.30    9.28   0
  15   1   4   48.32   11.00   0
 -17   1  -4    1.50    9.41   0
 -17   1  -4    2.99    9.43   0
 -17  -1  -4   -2.45    9.27   0
 -17  -1  -4    9.86   10.03   0
  17   1   4    2.74    9.22   0
  17  -1   4   -0.11    9.47   0
  17   1   4    1.35    9.24   0
 -19  -1  -4   -0.75   10.29   0
  19  -1   4    9.91    9.56   0
  19   1   4    5.17   11.89   0
  19   1   4    4.04    9.88   0
 -19  -1  -4    6.18    9.90   0
 -19   1  -4    3.18    9.82   0
 -19   1  -4    9.44    9.78   0
  21  -1   4   10.33   10.52   0
 -21   1  -4    5.70   11.04   0
 -21   1  -4    9.13   10.77   0
 -21  -1  -4   10.90   12.97   0
  21   1   4    3.08   10.45   0
  21   1   4    6.94   13.10   0
 -21  -1  -4    0.47   11.25   0
 -23  -1  -4  141.65   11.71   0
 -23   1  -4  152.01   12.17   0
 -23  -1  -4  146.74   12.60   0
  23  -1   4  130.00   11.83   0
  23   1   4  124.40   11.68   0
  23   1   4  151.49   14.53   0
 -23   1  -4  129.04   11.98   0
 -24  -2   4    8.39   15.46   0
  24  -2  -4   -3.07   11.36   0
  24   2  -4   11.88   11.28   0
  24   2  -4   11.43   14.14   0
 -24   2   4    3.23   18.05   0
 -24  -2   4    9.30   11.50   0
  22  -2  -4   -0.51   10.39   0
  22   2  -4    2.44   12.97   0
 -22  -2   4   16.07   11.03   0
 -22   2   4   17.28   16.79   0
  22   2  -4   24.45   12.94   0
 -22  -2   4    5.47   14.35   0
  20  -2  -4   18.42   11.79   0
  20   2  -4   21.75   11.97   0
  20   2  -4   12.70    9.82   0
 -20  -2   4   26.22   12.38   0
  20  -2  -4   22.52   13.85   0
 -20  -2   4   19.26   10.69   0
 -20   2   4   15.34   15.66   0
  18  -2  -4   28.51    9.12   0
  18   2  -4   21.91    9.47   0
  18  -2  -4   34.67   13.20   0
 -18   2   4   31.95   14.72   0
 -18  -2   4   20.96   12.42   0
 -18  -2   4   20.85    9.65   0
  18   2  -4   18.79   11.56   0
  16   2  -4   92.88   11.52   0
  16  -2  -4   77.28    8.93   0
  16   2  -4   72.56    8.98   0
 -16  -2   4   95.66   12.22   0
  16  -2  -4   94.38   12.94   0
 -16   2   4   83.34   14.66   0
 -16  -2   4   83.45    9.23   0
  14  -2  -4    7.58    8.43   0
  14   2  -4    4.75   10.25   0
 -14  -2   4   -4.56   10.92   0
  14   2  -4    9.00   10.76   0
  14  -2  -4    4.51   12.00   0
 -14   2   4    4.78   14.79   0
 -14  -2   4   14.55    8.62   0
  12  -2  -4   24.48    8.23   0
  12   2  -4   21.57    8.19   0
  12   2  -4   30.28   11.03   0
 -12  -2   4   31.53    8.82   0
 -12  -2   4   28.71    8.45   0
  12  -2  -4   36.55   13.04   0
 -12   2   4   30.42   14.11   0
 -10  -2   4    3.50   10.64   0
 -10   2   4    5.59   15.67   0
  10   2  -4   -0.72    7.89   0
  10   2  -4   -0.53   10.76   0
  10  -2  -4    3.62   13.58   0
 -10  -2   4    2.90    8.10   0
  10  -2  -4    8.82    8.27   0
   8   2  -4    0.86    7.60   0
  -8  -2   4    7.60    7.64   0
  -8  -2   4   -0.39    8.19   0
   8   2  -4    2.19   10.17   0
   8  -2  -4    9.53    8.05   0
   6   2  -4   84.96    9.90   0
  -6  -2   4   81.26    8.45   0
   6   2  -4   86.61    9.09   0
   6  -2  -4   78.28    8.69   0
  -6  -2   4   80.13    8.87   0
   4   2  -4   24.87    9.63   0
   4  -2  -4   26.14   16.05   0
   4  -2  -4   34.34   14.92   0
   4   2  -4   29.18   10.46   0
  -4  -2   4   27.38    8.49   0
  -4  -2   4   31.82   10.01   0
   2   2  -4   17.85    8.55   0
   2   2  -4   20.09   11.17   0
  -2  -2   4   19.07    8.50   0
   2  -2  -4   23.31   11.39   0
   0   2  -4  309.75   10.41   0
   0  -2  -4  396.10   12.68   0
   0   2   4  402.03   12.82   0
   0   2  -4  363.97   18.64   0
  -2  -2  -4   41.34    8.57   0
  -2   2  -4   27.38    8.35   0
  -2  -2  -4   31.43    8.66   0
   2   2   4   40.56    8.55   0
  -2   2  -4   32.25   15.24   0
  -4  -2  -4  499.61   10.92   0
  -4   2  -4  449.87   16.29   0
  -4   2  -4  566.22   10.83   0
  -4  -2  -4  395.72   12.23   0
   4  -2   4  415.05   16.27   0
   4   2   4  498.96   12.47   0
  -6   2  -4   12.74   11.47   0
  -6  -2  -4   15.23    8.12   0
   6  -2   4    7.11   10.23   0
  -6  -2  -4    9.84    8.08   0
   6   2   4   10.06    8.14   0
  -6   2  -4   13.57    7.88   0
   6   2   4    8.80    8.09   0
  -8  -2  -4   27.35    8.31   0
   8  -2   4   23.19   10.66   0
  -8   2  -4   26.29   10.29   0
   8   2   4   25.86    8.34   0
  -8  -2  -4   17.44    8.46   0
  -8   2  -4   30.45    8.15   0
   8   2   4   25.72    8.40   0
 -10  -2  -4   20.62    8.31   0
 -10  -2  -4   14.64    8.50   0
  10  -2   4   14.68   10.34   0
  10   2   4    8.06    8.28   0
  10   2   4   13.28    8.19   0
 -10   2  -4   11.88    9.90   0
 -10   2  -4   15.84   10.06   0
 -12   2  -4  149.18   10.87   0
 -12  -2  -4  171.73   11.17   0
  12  -2   4  143.81    9.34   0
 -12  -2  -4  133.43   10.92   0
  12   2   4  182.63    9.07   0
 -12   2  -4  181.43    8.88   0
  12   2   4  145.93    9.21   0
 -14   2  -4   82.23   10.92   0
 -14  -2  -4   86.54    9.37   0
 -14  -2  -4   83.17    9.24   0
  14   2   4   75.31   11.07   0
  14   2   4   88.12    9.18   0
  14  -2   4   66.82    9.15   0
 -14   2  -4   92.86   10.94   0
 -16   2  -4    3.52    9.18   0
 -16  -2  -4    8.83   11.70   0
  16  -2   4    7.54   11.41   0
  16   2   4   -3.86   10.89   0
  16   2   4    3.50    9.11   0
 -16  -2  -4   -3.40    8.89   0
 -16   2  -4    6.47    8.68   0
 -18   2  -4   67.49   12.16   0
 -18   2  -4   59.27    9.72   0
 -18  -2  -4   55.39   11.94   0
  18   2   4   63.50    9.86   0
  18  -2   4   63.98   12.11   0
  18   2   4   68.35    9.54   0
 -18  -2  -4   72.60   10.40   0
 -20   2  -4   27.12   10.28   0
  20   2   4   28.11   10.45   0
 -20  -2  -4   15.42   12.59   0
 -20  -2  -4   25.81   10.70   0
  20  -2   4   10.53   10.58   0
  20   2   4   17.55    9.95   0
 -20   2  -4   23.11   10.15   0
 -22  -2  -4   49.61   11.27   0
 -22   2  -4   57.76   11.35   0
 -22  -2  -4   64.42   14.15   0
  22  -2   4   46.00   11.40   0
  22   2   4   44.72   10.90   0
  22   2   4   57.40   11.02   0
 -22   2  -4   57.99   11.40   0
  23   3  -4   29.37   11.09   0
  23  -3  -4   38.15   10.95   0
 -23  -3   4   39.47   11.38   0
 -23  -3   4   16.21   14.79   0
 -23   3   4   22.42   17.47   0
  23   3  -4   26.51   13.50   0
  21  -3  -4   17.01   12.46   0
  21   3  -4   13.69   10.31   0
  21   3  -4   13.16   12.77   0
 -21   3   4   21.47   16.40   0
 -21  -3   4   12.28   12.93   0
 -21  -3   4   21.62   10.90   0
  19   3  -4  197.63   10.34   0
 -19  -3   4  196.00   13.56   0
  19  -3  -4  216.92   12.47   0
 -19  -3   4  194.85   10.63   0
  19   3  -4  250.53   10.81   0
 -19   3   4  219.32   16.69   0
  17  -3  -4   66.13    9.35   0
  17   3  -4   82.57   11.68   0
  17   3  -4   62.93    9.17   0
 -17  -3   4   63.09    9.54   0
 -17   3   4   63.27   14.83   0
 -17  -3   4   59.75   10.36   0
  15  -3  -4  171.34   11.16   0
  15   3  -4  203.90   10.20   0
  15   3  -4  184.36    9.15   0
 -15  -3   4  188.53    9.37   0
 -15  -3   4  188.42   12.53   0
 -15   3   4  202.37   16.74   0
  13  -3  -4  334.72    9.91   0
 -13  -3   4  353.94   10.95   0
  13   3  -4  339.62    9.64   0
 -13  -3   4  309.61    9.67   0
 -13   3   4  375.22   18.98   0
  13   3  -4  387.43   12.81   0
 -11  -3   4  125.32    8.95   0
 -11   3   4  155.29   21.73   0
 -11  -3   4  139.90    9.47   0
  11   3  -4  161.63   11.44   0
  11   3  -4  143.85    8.67   0
  11  -3  -4  136.91    8.94   0
  -9  -3   4  497.39   12.16   0
   9   3  -4  470.16   10.60   0
  -9  -3   4  501.27   12.82   0
   9  -3  -4  517.17   10.40   0
   9   3  -4  582.38   11.76   0
  -7  -3   4    2.04    8.08   0
  -7  -3   4    2.41    7.73   0
   7   3  -4    7.37    8.12   0
   7   3  -4    5.13    9.29   0
   5   3  -4  219.20    9.74   0
   5   3  -4  205.03   10.86   0
  -5  -3   4  218.21   11.20   0
  -5  -3   4  221.01    9.55   0
   3   3  -4  189.76   11.74   0
  -3  -3   4  195.11   13.07   0
   3   3  -4  201.25    9.78   0
  -3  -3   4  178.13    9.46   0
  -3   3   4  226.02   14.55   0
   3  -3  -4  258.25   16.91   0
   1   3  -4  697.62   12.39   0
   1  -3  -4  871.40   16.57   0
   1   3  -4  722.07   23.22   0
  -1  -3   4  702.48   12.29   0
  -1   3   4  804.70   15.96   0
  -1  -3  -4  150.45   11.06   0
  -1   3  -4  120.80    8.88   0
   1   3   4  146.20    9.34   0
  -3  -3  -4 1002.84   13.63   0
  -3  -3  -4  829.79   12.47   0
  -3   3  -4  794.97   12.05   0
   3   3   4  902.26   13.01   0
  -3   3  -4  895.31   30.34   0
  -5  -3  -4  254.42    9.67   0
   5  -3   4  209.77   15.16   0
  -5  -3  -4  198.30    9.40   0
  -5   3  -4  236.63   13.73   0
   5   3   4  237.53    9.45   0
  -7   3  -4  712.07   14.83   0
   7  -3   4  671.88   15.33   0
  -7  -3  -4  628.55   13.03   0
   7   3   4  615.37   11.38   0
  -7   3  -4  842.99   11.52   0
  -7  -3  -4  794.01   11.72   0
   7   3   4  760.29   11.55   0
  -9   3  -4   16.50    9.78   0
  -9  -3  -4   15.91    8.41   0
  -9  -3  -4   15.99    8.53   0
   9   3   4   16.60    8.56   0
  -9   3  -4   23.00    8.26   0
   9  -3   4   12.61   10.68   0
   9   3   4   18.85    8.35   0
 -11   3  -4 1464.24   16.27   0
 -11  -3  -4 1648.03   13.99   0
 -11  -3  -4 1331.60   14.81   0
  11  -3   4 1347.94   16.26   0
  11   3   4 1434.96   13.78   0
 -11   3  -4 1782.34   14.03   0
  11   3   4 1560.78   15.05   0
  13  -3   4   86.56    9.22   0
 -13  -3  -4   96.91    8.97   0
 -13  -3  -4  108.80    9.41   0
  13   3   4   88.39    9.12   0
 -13   3  -4  101.63   10.76   0
  13   3   4  122.44    9.29   0
 -13   3  -4  114.23    8.93   0
 -15  -3  -4 1049.61   12.19   0
 -15  -3  -4 1270.94   13.42   0
  15  -3   4 1033.82   13.31   0
 -15   3  -4 1260.24   12.66   0
  15   3   4 1045.98   12.35   0
 -15   3  -4 1084.34   13.09   0
  15   3   4 1243.08   12.93   0
  17   3   4   28.53    9.61   0
 -17  -3  -4   39.48    9.54   0
  17  -3   4   35.46    9.91   0
 -17   3  -4   32.58    9.47   0
 -17  -3  -4   39.78    9.99   0
  17   3   4   41.08    9.70   0
 -17   3  -4   49.38   11.53   0
 -19  -3  -4  213.56   10.64   0
  19   3   4  167.56   10.60   0
  19  -3   4  181.83   13.04   0
 -19  -3  -4  219.14   11.17   0
 -19   3  -4  197.08   10.78   0
 -19   3  -4  214.54   10.71   0
  19   3   4  230.96   12.89   0
 -21  -3  -4    2.23   10.68   0
 -21   3  -4    3.40   10.72   0
 -21  -3  -4    6.94   11.05   0
  21   3   4   -0.13   10.70   0
 -21   3  -4    6.49   10.61   0
  21  -3   4   -4.11   10.70   0
  21   3   4  -14.20   10.64   0
 -23   3  -4   23.94   14.57   0
 -23  -3  -4   16.83   11.58   0
 -23  -3  -4   46.90   12.19   0
  23   3   4   18.03   11.75   0
  23  -3   4   15.02   12.07   0
  23   3   4   19.52   11.62   0
 -23   3  -4   19.66   11.87   0
 -24  -4   4  125.90   16.01   0
  24  -4  -4  128.43   11.73   0
 -24   4   4  145.59   21.35   0
  24   4  -4  150.76   15.01   0
  24   4  -4  120.11   11.63   0
 -24  -4   4  152.80   11.76   0
 -22  -4   4   37.69   11.76   0
 -22  -4   4   34.04   10.81   0
  22   4  -4   31.49   12.95   0
  22  -4  -4   40.24   11.02   0
  22   4  -4   57.64   13.35   0
 -22   4   4   53.65   17.47   0
  20   4  -4  606.18   11.59   0
 -20  -4   4  638.74   13.24   0
  20   4  -4  689.15   12.81   0
  20  -4  -4  639.41   11.57   0
 -20   4   4  711.22   21.56   0
 -20  -4   4  607.74   11.78   0
 -18  -4   4   34.34   12.65   0
  18  -4  -4   28.49   11.61   0
  18   4  -4   23.53    9.47   0
 -18   4   4   24.13   17.26   0
  18   4  -4   28.05    9.97   0
 -18  -4   4   17.80    9.84   0
 -16  -4   4 1161.62   12.61   0
  16  -4  -4 1161.57   12.53   0
 -16  -4   4 1213.42   16.21   0
  16   4  -4 1263.52   15.87   0
  16   4  -4 1108.19   13.92   0
 -16   4   4 1284.04   23.66   0
  14   4  -4    6.79   11.34   0
 -14  -4   4    0.62    9.38   0
  14   4  -4    8.46    8.39   0
 -14  -4   4    2.91   10.52   0
 -14   4   4   -0.88   15.50   0
  14  -4  -4   -1.80    8.77   0
 -14   4   4    1.58   16.59   0
 -12  -4   4  656.85   11.96   0
  12   4  -4  624.26   12.31   0
  12   4  -4  722.80   13.77   0
 -12   4   4  619.55   26.96   0
 -12  -4   4  634.55   10.95   0
 -12   4   4  700.65   29.61   0
  12  -4  -4  633.97   10.96   0
  10   4  -4   90.65    8.94   0
 -10  -4   4   76.78    8.91   0
 -10  -4   4   82.01   10.21   0
  10   4  -4   76.15    8.29   0
  10  -4  -4  100.04   10.42   0
   8   4  -4  585.55   11.22   0
  -8  -4   4  578.00   12.81   0
  -8  -4   4  615.60   11.69   0
   8  -4  -4  605.71   10.94   0
   8   4  -4  647.45   11.97   0
   6   4  -4  548.19   11.41   0
   6   4  -4  497.69   12.92   0
  -6  -4   4  485.13   10.91   0
  -6  -4   4  499.96   12.53   0
  -4  -4   4 2152.03   21.75   0
   4  -4  -4 2479.39   34.10   0
  -4  -4   4 2045.04   17.98   0
   4   4  -4 2162.87   22.15   0
   4   4  -4 2211.90   18.86   0
  -4   4   4 2382.65   32.92   0
  -2  -4   4    4.72   12.75   0
   2   4  -4    4.57   11.57   0
   2  -4  -4    8.20   11.94   0
   2   4  -4    3.09    8.33   0
  -2  -4   4    1.00    8.25   0
  -2   4   4    3.68   11.34   0
   0   4  -4 1771.86   15.65   0
   0  -4  -4 2243.49   21.45   0
   0  -4   4 1631.77   15.32   0
   0   4   4 1977.79   20.10   0
  -2  -4  -4    6.55    8.26   0
  -2  -4  -4    5.92    8.10   0
  -2   4  -4    5.00    7.87   0
   2   4   4    5.52    7.87   0
  -4  -4  -4  656.66   11.64   0
   4  -4   4  555.12   23.87   0
   4   4   4  600.08   11.20   0
  -4  -4  -4  513.27   10.85   0
  -4   4  -4  535.18   10.52   0
  -6   4  -4  154.30    8.64   0
   6  -4   4  170.81   14.86   0
  -6  -4  -4  149.85    9.18   0
  -6  -4  -4  176.49    9.29   0
   6   4   4  169.84   11.02   0
   8  -4   4  355.04   14.42   0
  -8  -4  -4  435.83   10.37   0
   8   4   4  426.61   10.12   0
   8   4   4  364.63    9.99   0
  -8  -4  -4  343.72   10.07   0
  -8   4  -4  448.83   10.20   0
  -8   4  -4  381.44   12.43   0
 -10  -4  -4  137.82    9.02   0
 -10  -4  -4  104.18    8.99   0
  10   4   4  105.21    9.01   0
  10  -4   4  106.11   11.21   0
 -10   4  -4  111.85   10.67   0
 -10   4  -4  134.17   10.59   0
  10   4   4  124.97    8.94   0
  12  -4   4  173.47   11.47   0
 -12  -4  -4  208.83    9.64   0
 -12  -4  -4  178.79   11.29   0
 -12   4  -4  188.49   11.14   0
  12   4   4  172.92    9.60   0
 -12   4  -4  217.76    9.22   0
  12   4   4  204.90    9.57   0
 -14  -4  -4  365.15   10.40   0
  14  -4   4  363.16   12.63   0
 -14  -4  -4  483.31   10.75   0
  14   4   4  373.03   10.24   0
 -14   4  -4  459.61   10.34   0
  14   4   4  436.79   12.29   0
 -14   4  -4  399.16   12.31   0
 -16   4  -4  160.43   11.89   0
 -16  -4  -4  147.89   11.95   0
  16   4   4  148.82    9.94   0
  16   4   4  173.39   10.14   0
 -16  -4  -4  205.69   10.30   0
 -16   4  -4  165.56   11.82   0
  16  -4   4  149.53   11.97   0
 -18  -4  -4  487.68   11.36   0
  18  -4   4  489.62   11.92   0
 -18  -4  -4  587.70   12.24   0
  18   4   4  464.22   11.46   0
 -18   4  -4  532.28   13.68   0
  18   4   4  600.80   11.78   0
 -18   4  -4  590.33   13.55   0
  20  -4   4  135.88   11.22   0
 -20  -4  -4  121.44   10.77   0
 -20  -4  -4  159.65   11.34   0
  20   4   4  172.33   13.30   0
 -20   4  -4  144.55   11.02   0
 -20   4  -4  168.80   11.18   0
  20   4   4  114.12   11.09   0
 -22   4  -4  166.76   14.47   0
 -22  -4  -4  160.82   11.61   0
  22  -4   4  151.00   12.00   0
 -22  -4  -4  185.80   12.46   0
  22   4   4  147.80   11.75   0
 -22   4  -4  153.53   14.42   0
  22   4   4  180.73   11.79   0
  23   5  -4  -17.48   11.21   0
  23  -5  -4   -3.24   11.16   0
 -23   5   4   -4.76   17.79   0
  23   5  -4   -5.89   14.03   0
 -23  -5   4    4.37   12.21   0
 -23   5   4    4.64   16.14   0
 -23  -5   4    0.49   11.63   0
 -21  -5   4   85.37   13.65   0
  21   5  -4   89.75   13.44   0
 -21  -5   4   84.39   11.88   0
  21  -5  -4  103.33   10.60   0
  21   5  -4   87.82   10.91   0
 -21   5   4  102.35   19.52   0
 -21   5   4   83.00   15.25   0
 -19  -5   4    4.80   10.10   0
  19  -5  -4   14.45   10.06   0
  19   5  -4    8.38   12.40   0
  19   5  -4   13.93    9.94   0
 -19  -5   4   14.40   13.45   0
 -19   5   4   11.23   17.48   0
 -19   5   4    7.29   15.40   0
  17  -5  -4  111.41   11.78   0
 -17  -5   4  115.60   10.72   0
  17   5  -4  104.19   10.29   0
 -17   5   4   94.46   15.35   0
  17   5  -4  111.59    9.63   0
 -17  -5   4  105.77    9.92   0
 -17   5   4  114.74   17.41   0
  15  -5  -4    5.95    9.25   0
 -15  -5   4   14.61    8.95   0
 -15  -5   4    9.25   12.09   0
  15   5  -4   18.50    9.57   0
  15   5  -4    5.81    8.98   0
 -15   5   4   10.63   18.56   0
 -15   5   4   14.09   15.35   0
  13   5  -4  287.34   11.38   0
 -13  -5   4  301.05   10.53   0
 -13  -5   4  294.71   10.05   0
  13   5  -4  345.84   10.83   0
 -13   5   4  342.32   25.34   0
 -13   5   4  288.07   23.75   0
  13  -5  -4  298.67   10.11   0
  11   5  -4  220.26    9.42   0
 -11  -5   4  199.81   11.61   0
  11   5  -4  234.17   11.76   0
 -11  -5   4  211.25    9.64   0
  11  -5  -4  220.69    9.38   0
  -9  -5   4  343.65    9.91   0
   9   5  -4  329.67    9.74   0
   9   5  -4  393.02   10.51   0
  -9  -5   4  364.23   10.26   0
   9  -5  -4  352.73    9.82   0
  -7  -5   4  163.14   10.51   0
  -7  -5   4  172.21   11.17   0
   7   5  -4  179.02    9.23   0
   7   5  -4  154.72    9.08   0
   5  -5  -4  872.95   22.03   0
   5   5  -4  828.90   12.61   0
   5   5  -4  779.93   14.90   0
  -5   5   4  864.45   22.91   0
  -5  -5   4  753.85   15.03   0
  -5  -5   4  738.74   13.55   0
  -3   5   4   81.61   12.38   0
  -3  -5   4   68.44   10.34   0
   3   5  -4   77.23    8.76   0
   3   5  -4   66.06   10.51   0
  -3  -5   4   70.57   11.98   0
   3  -5  -4   80.27   12.63   0
  -1  -5   4 2205.18   30.94   0
  -1  -5   4 2153.37   16.47   0
   1  -5  -4 2628.82   23.56   0
   1   5  -4 2189.30   16.88   0
  -1   5   4 2482.95   22.77   0
  -1   5  -4  360.67    9.88   0
   1  -5   4  407.59    9.99   0
   1   5   4  433.04   10.99   0
  -1  -5  -4  453.35   11.58   0
  -3  -5  -4 1994.37   16.70   0
  -3  -5  -4 1452.06   14.43   0
   3   5   4 1870.62   16.39   0
  -3   5  -4 1544.86   14.28   0
   5  -5   4  257.35   16.83   0
  -5   5  -4  227.87   10.81   0
  -5  -5  -4  299.41    9.93   0
  -5  -5  -4  248.29    9.36   0
   5   5   4  281.41   11.64   0
  -7   5  -4  410.70   10.05   0
   7  -5   4  445.13   15.24   0
  -7  -5  -4  535.97   12.54   0
  -7  -5  -4  419.70   11.78   0
   7   5   4  518.05   10.64   0
  -9   5  -4  143.63   10.44   0
   9  -5   4  155.22   11.59   0
  -9  -5  -4  160.79   10.88   0
  -9  -5  -4  194.41    9.38   0
  -9   5  -4  203.32    9.09   0
   9   5   4  160.29    9.24   0
   9   5   4  200.25    9.42   0
 -11  -5  -4  304.88   11.64   0
 -11  -5  -4  364.68   12.31   0
  11  -5   4  291.04   12.31   0
  11   5   4  285.60    9.76   0
 -11   5  -4  363.25   11.55   0
 -11   5  -4  286.82   11.17   0
  11   5   4  350.94   12.10   0
  13  -5   4    9.63   11.22   0
 -13  -5  -4   23.37    9.33   0
 -13  -5  -4   18.22    9.09   0
 -13   5  -4    9.71   10.66   0
  13   5   4   16.51   11.14   0
 -13   5  -4    7.50    8.76   0
  13   5   4   12.48    9.05   0
 -15  -5  -4  277.05   10.23   0
  15  -5   4  265.01   12.70   0
 -15   5  -4  294.00   10.45   0
 -15  -5  -4  352.16   10.86   0
  15   5   4  274.73   12.43   0
 -15   5  -4  329.03   12.32   0
  15   5   4  311.43   10.54   0
 -17  -5  -4   -2.64   10.38   0
 -17   5  -4   -3.32    9.61   0
 -17  -5  -4   -9.06   12.09   0
  17   5   4    6.41    9.69   0
  17   5   4    7.51   10.16   0
  17  -5   4   -3.17   11.98   0
 -17   5  -4    4.08   11.56   0
 -19  -5  -4  148.71   10.60   0
  19  -5   4  136.64   13.54   0
 -19  -5  -4  184.98   11.33   0
  19   5   4  152.45   13.05   0
  19   5   4  168.53   13.12   0
 -19   5  -4  175.10   11.08   0
 -19   5  -4  177.95   10.73   0
 -21   5  -4   29.76   13.42   0
 -21  -5  -4   12.73   10.97   0
  21  -5   4   24.65   11.04   0
 -21  -5  -4   30.06   11.69   0
  21   5   4   16.45   13.50   0
 -21   5  -4   15.80   11.05   0
  21   5   4   21.65   10.95   0
 -22  -6   4   -1.58   11.20   0
  22   6  -4    0.78   11.59   0
  22   6  -4   10.61   11.12   0
 -22   6   4    3.45   17.87   0
 -22   6   4    4.56   21.62   0
  22  -6  -4    0.12   10.99   0
 -22  -6   4    1.65   11.93   0
 -20  -6   4   23.41   10.55   0
  20  -6  -4   13.51   10.61   0
  20   6  -4   14.90   10.72   0
 -20  -6   4   13.34   11.33   0
  20   6  -4   12.52   10.13   0
 -20   6   4   14.01   16.29   0
 -20   6   4   11.72   20.25   0
 -18  -6   4    1.82    9.55   0
 -18  -6   4    6.03   12.80   0
  18   6  -4   -4.71   10.36   0
 -18   6   4    2.80   16.66   0
 -18   6   4    1.93   18.66   0
  18  -6  -4    0.19   12.13   0
  18   6  -4   -0.19    9.56   0
 -16   6   4   14.50   17.63   0
  16  -6  -4   12.23    9.61   0
 -16  -6   4   19.94   10.22   0
  16   6  -4   13.17    9.98   0
  16   6  -4   24.39    9.23   0
 -16   6   4   21.12   19.48   0
 -16  -6   4   22.76   11.55   0
 -14  -6   4   14.31    9.18   0
 -14  -6   4   10.69    9.65   0
  14   6  -4   11.01    9.39   0
 -14   6   4    6.64   21.97   0
 -14   6   4    7.39   19.39   0
  14   6  -4   11.95    8.84   0
  14  -6  -4    1.23    8.86   0
 -12  -6   4   26.99    8.90   0
 -12  -6   4   38.66   11.36   0
 -12   6   4   38.35   26.06   0
  12   6  -4   46.59    9.38   0
 -12   6   4   35.61   25.49   0
  12  -6  -4   33.25   10.89   0
  12   6  -4   37.90    8.69   0
  10   6  -4  100.43    8.86   0
 -10  -6   4  100.67    9.29   0
  10  -6  -4  106.75   10.79   0
  10   6  -4  107.39    9.20   0
 -10  -6   4   97.49    8.96   0
  -8  -6   4   30.45   10.36   0
   8   6  -4   26.20    8.41   0
  -8   6   4   29.79   18.50   0
  -8  -6   4   28.37    8.65   0
   8   6  -4   24.09    8.82   0
  -6  -6   4  403.08   12.66   0
   6  -6  -4  439.63   17.00   0
   6   6  -4  399.78   10.77   0
  -6   6   4  494.85   18.77   0
  -6  -6   4  449.99   10.68   0
   6   6  -4  478.03   10.74   0
  -4  -6   4  496.40   10.63   0
  -4  -6   4  531.35   13.91   0
   4   6  -4  530.13   10.82   0
  -4   6   4  579.37   17.03   0
   4  -6  -4  564.08   16.12   0
   4   6  -4  498.14   14.76   0
  -2  -6   4 1197.75   20.78   0
  -2   6   4 1449.99   19.16   0
   2   6  -4 1360.23   13.79   0
  -2  -6   4 1288.89   13.33   0
   2  -6  -4 1423.32   18.55   0
   0   6   4 1591.46   17.23   0
   0  -6   4 1417.19   26.87   0
   0  -6   4 1422.48   13.75   0
   0  -6  -4 1658.51   18.35   0
   0   6  -4 1416.12   13.87   0
  -2   6  -4  597.80   10.89   0
   2   6   4  651.78   11.98   0
   2  -6   4  561.46   24.72   0
   2  -6   4  657.44   25.01   0
  -2  -6  -4  728.32   13.65   0
  -2  -6  -4  620.42   11.19   0
   2  -6   4  580.44   10.89   0
   4   6   4   75.00    9.00   0
  -4   6  -4   63.22    8.30   0
  -4  -6  -4   85.31    9.04   0
  -4  -6  -4   68.30    8.50   0
   4  -6   4   75.02   15.46   0
   6  -6   4   40.96   11.85   0
  -6  -6  -4   40.08    8.48   0
  -6  -6  -4   51.77   10.66   0
   6   6   4   58.86   10.69   0
  -6   6  -4   37.57    8.19   0
   8   6   4  121.34    9.15   0
   8  -6   4   99.49   11.17   0
  -8   6  -4   92.55    8.58   0
  -8  -6  -4  114.52    9.16   0
  -8  -6  -4   99.22    8.86   0
  10  -6   4   11.54   12.58   0
 -10  -6  -4    5.39    9.01   0
 -10  -6  -4   15.92   10.96   0
  10   6   4   12.97    8.78   0
 -10   6  -4    9.95   10.42   0
  10   6   4   18.43    8.83   0
 -10   6  -4   12.04    8.37   0
 -12  -6  -4   89.34    9.61   0
 -12  -6  -4  126.88   11.54   0
 -12   6  -4  101.80    8.85   0
  12   6   4  105.08    9.44   0
 -12   6  -4  129.99    9.17   0
  12   6   4  109.89   11.46   0
  12  -6   4  117.61   11.67   0
  14  -6   4   59.11   11.69   0
 -14   6  -4   51.90    8.81   0
 -14  -6  -4   65.44   11.94   0
  14   6   4   62.28    9.61   0
 -14  -6  -4   64.63    9.88   0
  14   6   4   64.00   11.82   0
 -14   6  -4   78.80    9.18   0
 -16  -6  -4   19.86   10.01   0
  16  -6   4   21.56   12.03   0
 -16  -6  -4   32.36   10.40   0
  16   6   4   31.36   10.07   0
 -16   6  -4   26.48    9.74   0
 -16   6  -4   29.77    9.47   0
  16   6   4   33.15   10.07   0
 -18   6  -4   43.96   10.10   0
 -18  -6  -4   50.38   10.49   0
 -18  -6  -4   68.31   10.93   0
  18  -6   4   61.31   10.36   0
  18   6   4   53.44   10.64   0
 -18   6  -4   68.30   12.83   0
  18   6   4   60.05   10.58   0
 -20  -6  -4    3.92   10.71   0
  20  -6   4   11.30   13.88   0
 -20  -6  -4   18.52   13.68   0
  20   6   4   -8.76   11.09   0
 -20   6  -4   13.08   10.63   0
  20   6   4   -1.00   10.91   0
 -20   6  -4   12.17   13.26   0
 -22   6  -4   19.03   14.53   0
  22  -6   4    8.21   15.11   0
 -22   6  -4    7.38   14.22   0
 -22  -6  -4   28.33   14.38   0
 -22  -6  -4   13.38   12.27   0
  22   6   4   -7.31   11.69   0
  22   6   4   22.79   11.82   0
 -21  -7   4   24.22   13.87   0
  21   7  -4   29.56   14.08   0
 -21  -7   4   22.53   12.10   0
  21   7  -4   23.23   10.77   0
 -21   7   4   27.29   22.97   0
 -21   7   4   18.73   21.03   0
  21  -7  -4   25.68   11.00   0
  19  -7  -4   -0.46   10.38   0
  19   7  -4    4.79   10.72   0
 -19  -7   4   14.65   13.53   0
  19   7  -4    9.24   12.46   0
 -19  -7   4    2.81   10.50   0
 -19   7   4   10.45   21.69   0
 -19   7   4    8.12   19.56   0
  17  -7  -4  202.43   10.57   0
 -17  -7   4  183.92   12.75   0
  17   7  -4  220.74   13.47   0
  17   7  -4  197.72   10.14   0
 -17   7   4  225.72   23.37   0
 -17  -7   4  206.67   11.40   0
 -17   7   4  191.01   21.40   0
 -15  -7   4   59.67    9.63   0
 -15  -7   4   71.19   10.29   0
 -15   7   4   78.67   20.74   0
  15   7  -4   66.18   12.29   0
  15   7  -4   69.80    9.31   0
  15  -7  -4   60.79    9.49   0
 -15   7   4   65.66   19.84   0
 -13   7   4  579.61   26.71   0
 -13   7   4  655.63   27.29   0
 -13  -7   4  589.82   11.53   0
  13   7  -4  547.96   10.99   0
  13   7  -4  656.01   12.12   0
  13  -7  -4  604.93   11.25   0
 -13  -7   4  545.75   11.26   0
 -11  -7   4    5.46   10.89   0
  11   7  -4    4.51   10.72   0
 -11  -7   4    0.52    8.90   0
  11   7  -4    4.04    8.95   0
 -11   7   4    3.78   18.26   0
 -11   7   4    3.52   19.91   0
  11  -7  -4    6.74    8.67   0
  -9  -7   4  183.78   11.26   0
  -9  -7   4  201.33    9.74   0
  -9   7   4  211.39   17.93   0
   9   7  -4  229.24    9.76   0
   9   7  -4  187.59   11.16   0
  -7  -7   4   91.44    9.03   0
  -7   7   4  105.52   15.33   0
   7   7  -4   97.23   10.64   0
   7  -7  -4   93.16   13.67   0
  -7  -7   4  104.41    8.99   0
   7   7  -4   96.40    9.11   0
   5   7  -4    7.57    8.54   0
   5  -7  -4   -0.93   11.70   0
  -5  -7   4   -2.47   10.47   0
  -5   7   4    2.19   12.74   0
   5   7  -4    6.35   10.18   0
  -5  -7   4    2.73    8.43   0
   3   7  -4    4.16    8.65   0
  -3  -7   4    9.48    8.34   0
   3  -7  -4    2.82   10.69   0
  -3   7   4    5.79   11.20   0
  -3  -7   4    6.27   12.16   0
  -1   7   4  501.73   14.18   0
  -1  -7   4  426.39   16.68   0
   1   7  -4  455.81   12.18   0
  -1  -7   4  482.33   10.55   0
   1  -7  -4  483.77   11.77   0
   1   7   4    0.46   10.69   0
   1  -7   4   15.64    8.33   0
   1  -7   4    4.32   13.07   0
  -1   7  -4    5.98    8.42   0
  -1  -7  -4   -4.15   10.51   0
  -3   7  -4  730.42   11.25   0
   3   7   4  862.78   14.18   0
   3  -7   4  764.28   12.80   0
   3  -7   4  730.60   21.48   0
  -3  -7  -4  716.70   11.20   0
  -3  -7  -4  879.60   14.26   0
   3  -7   4  848.55   20.69   0
   5   7   4    6.39    8.76   0
  -5   7  -4   -1.01    8.30   0
  -5  -7  -4    5.59    8.37   0
  -5  -7  -4    2.38    8.75   0
   5  -7   4    4.99   12.96   0
   7   7   4  102.08    9.21   0
  -7  -7  -4  111.02    9.00   0
   7  -7   4  103.39   12.65   0
  -7  -7  -4  114.14    9.25   0
  -7   7  -4   94.86    8.48   0
   9  -7   4    6.83   10.59   0
   9   7   4    6.58    9.03   0
  -9   7  -4    6.49    8.29   0
  -9  -7  -4    3.13    8.94   0
  -9  -7  -4   15.55    8.85   0
  11  -7   4   55.68   13.00   0
 -11   7  -4   52.43    8.86   0
 -11  -7  -4   51.90    9.28   0
 -11  -7  -4   80.20    9.44   0
  11   7   4   62.74    9.35   0
 -11   7  -4   58.55    8.92   0
  11   7   4   55.23   11.30   0
  13  -7   4    0.59   11.56   0
 -13  -7  -4    6.96    9.54   0
 -13  -7  -4    9.46    9.78   0
  13   7   4   11.94    9.55   0
 -13   7  -4    0.04    8.82   0
 -13   7  -4    6.44    9.17   0
  13   7   4    5.01    9.71   0
  15  -7   4  219.63   12.91   0
 -15  -7  -4  283.77   13.24   0
  15   7   4  222.51   12.70   0
 -15   7  -4  251.24   10.39   0
 -15   7  -4  201.27   12.04   0
 -15  -7  -4  226.97   12.57   0
  15   7   4  245.33   10.66   0
 -17   7  -4   20.13   11.91   0
  17  -7   4   12.77   12.86   0
 -17  -7  -4   11.88   12.51   0
 -17  -7  -4   27.91   10.82   0
  17   7   4   19.40   10.15   0
 -17   7  -4   22.48   10.25   0
  17   7   4    9.13   10.60   0
 -19  -7  -4  134.04   11.27   0
  19  -7   4  130.09   14.33   0
 -19   7  -4  136.90   10.88   0
 -19  -7  -4  172.24   11.98   0
  19   7   4  125.72   11.23   0
  19   7   4  140.79   11.43   0
 -19   7  -4  173.20   13.56   0
  21  -7   4   14.45   12.22   0
 -21   7  -4   -5.63   11.55   0
  21   7   4   12.70   11.56   0
 -21  -7  -4    1.65   12.03   0
  21   7   4    8.82   13.96   0
 -21  -7  -4    5.10   11.61   0
 -21   7  -4    0.75   11.60   0
 -22  -8   4   27.86   11.73   0
  22   8  -4   26.55   12.28   0
  22   8  -4   26.16   11.58   0
 -20  -8   4  151.26   14.02   0
  20   8  -4  180.35   11.96   0
 -20  -8   4  157.40   12.17   0
  20   8  -4  152.13   10.99   0
 -20   8   4  147.36   24.24   0
 -20   8   4  183.04   26.01   0
  20  -8  -4  158.97   11.27   0
 -18  -8   4  105.80   10.75   0
  18   8  -4  122.80   11.24   0
 -18  -8   4  118.14   11.40   0
 -18   8   4  107.71   22.35   0
  18   8  -4   98.95   12.76   0
 -18   8   4  130.13   24.04   0
  18  -8  -4  122.14   10.62   0
 -16  -8   4  386.93   11.17   0
 -16   8   4  390.10   24.10   0
 -16   8   4  479.31   25.49   0
 -16  -8   4  419.68   11.99   0
  16   8  -4  461.96   11.97   0
  16   8  -4  384.23   11.05   0
  16  -8  -4  393.99   10.98   0
 -14  -8   4   63.87   10.13   0
 -14  -8   4   67.54    9.85   0
 -14   8   4   74.86   20.17   0
  14   8  -4   48.31    9.54   0
  14   8  -4   74.21   10.12   0
 -14   8   4   61.12   20.34   0
  14  -8  -4   73.94   11.65   0
 -12  -8   4  239.42   10.09   0
 -12   8   4  309.00   19.59   0
 -12  -8   4  268.13   10.28   0
  12   8  -4  253.94   11.87   0
  12  -8  -4  279.05   10.14   0
  12   8  -4  314.64   10.58   0
 -12   8   4  284.10   20.80   0
  10   8  -4  109.37   11.19   0
  10   8  -4  126.20    9.56   0
 -10   8   4  109.46   17.54   0
 -10   8   4  129.74   16.05   0
 -10  -8   4  106.04    9.98   0
 -10  -8   4  108.37    9.33   0
   8   8  -4  339.23   11.94   0
  -8   8   4  384.96   16.50   0
  -8  -8   4  366.45   10.47   0
  -8  -8   4  340.08   12.05   0
   8   8  -4  360.00   10.36   0
  -6  -8   4  244.81   11.85   0
  -6   8   4  279.05   14.91   0
   6   8  -4  243.34   11.77   0
   6  -8  -4  262.18   14.06   0
  -6  -8   4  266.05    9.98   0
   6   8  -4  280.16    9.90   0
   4   8  -4 1066.60   12.50   0
  -4  -8   4 1068.53   12.20   0
  -4  -8   4  933.40   15.88   0
  -4   8   4 1094.68   17.69   0
   4  -8  -4 1086.52   16.67   0
   2  -8  -4  186.46   11.56   0
   2   8  -4  194.43    9.36   0
  -2  -8   4  157.73   12.08   0
  -2   8   4  190.89   12.14   0
  -2  -8   4  164.08    9.11   0
   0   8   4  413.91   12.99   0
   0  -8   4  335.18   14.82   0
   0  -8   4  353.39   10.04   0
   0   8  -4  374.00   10.06   0
   0  -8  -4  408.16   10.73   0
   2   8   4  261.13   10.29   0
   2  -8   4  200.84   15.22   0
  -2  -8  -4  199.74    9.31   0
  -2   8  -4  213.95    9.18   0
   2  -8   4  217.98    9.29   0
  -2  -8  -4  248.24    9.98   0
   4   8   4   50.14   11.12   0
   4  -8   4   46.23    8.63   0
  -4  -8  -4   47.88    8.70   0
   4  -8   4   43.55   13.69   0
  -4  -8  -4   44.84    9.32   0
  -4   8  -4   41.88    8.60   0
   4  -8   4   48.48   13.74   0
  -6  -8  -4  264.23    9.80   0
   6   8   4  298.34   10.11   0
  -6   8  -4  268.92    9.46   0
  -6  -8  -4  324.43   10.15   0
   6  -8   4  285.88   14.38   0
  -8  -8  -4  312.04   10.10   0
   8   8   4  350.78   10.15   0
  -8  -8  -4  365.63   12.21   0
  -8   8  -4  299.80    9.55   0
   8  -8   4  318.22   14.36   0
  10  -8   4   61.79   11.48   0
 -10  -8  -4   65.32    9.49   0
  10   8   4   67.62    9.44   0
 -10  -8  -4   77.78    9.41   0
 -10   8  -4   67.56   10.91   0
  12  -8   4  289.63   13.01   0
  12   8   4  323.06   10.70   0
 -12  -8  -4  286.43   10.74   0
 -12  -8  -4  339.29   12.81   0
  12   8   4  269.75   10.36   0
 -12   8  -4  355.68   12.37   0
 -12   8  -4  270.70   11.78   0
 -14   8  -4   94.75   11.79   0
 -14  -8  -4   88.67   10.39   0
 -14  -8  -4  104.23   10.57   0
  14   8   4   98.56   12.61   0
 -14   8  -4  100.23    9.87   0
  14  -8   4   93.97   12.27   0
  14   8   4  103.19   12.47   0
  16  -8   4   72.31   12.97   0
 -16  -8  -4   58.36   10.78   0
 -16   8  -4   61.27    9.98   0
 -16  -8  -4   81.69   13.22   0
  16   8   4   56.03   10.75   0
 -16   8  -4   83.45   10.03   0
  16   8   4   78.94   12.88   0
 -18  -8  -4  257.88   13.74   0
  18  -8   4  272.15   14.69   0
 -18   8  -4  247.67   11.26   0
  18   8   4  268.97   14.34   0
 -18  -8  -4  341.03   12.13   0
 -18   8  -4  294.75   13.76   0
  18   8   4  294.77   11.68   0
 -20  -8  -4   38.13   11.56   0
  20  -8   4   25.25   14.82   0
  20   8   4   20.97   11.30   0
 -20   8  -4   30.95   13.95   0
 -20  -8  -4   22.37   12.35   0
  20   8   4   37.33   11.97   0
 -20   8  -4   29.97   11.31   0
 -21  -9   4   67.21   12.15   0
  21  -9  -4   41.94   11.93   0
 -21  -9   4   68.53   12.64   0
  21   9  -4   68.66   11.83   0
  21   9  -4   62.83   12.37   0
  19  -9  -4   64.29   11.26   0
 -19   9   4   54.56   26.84   0
  19   9  -4   53.17   11.25   0
  19   9  -4   68.34   11.57   0
 -19  -9   4   62.87   13.59   0
 -19   9   4   65.11   27.57   0
 -19  -9   4   47.62   14.49   0
 -17  -9   4   57.54   10.55   0
 -17   9   4   58.09   23.00   0
  17   9  -4   53.83   11.03   0
  17  -9  -4   46.25   12.60   0
  17   9  -4   37.88   10.43   0
 -17   9   4   49.92   22.65   0
 -17  -9   4   57.18   11.28   0
 -15   9   4   12.12   20.39   0
 -15  -9   4   17.91    9.94   0
  15  -9  -4   21.28    9.91   0
  15   9  -4   21.06   12.65   0
  15   9  -4   12.60    9.89   0
 -15  -9   4   27.34   10.34   0
 -15   9   4   16.83   21.39   0
 -13  -9   4   79.83    9.92   0
 -13  -9   4   90.25   10.17   0
  13   9  -4   99.43   10.22   0
  13   9  -4   83.02   10.09   0
 -13   9   4   94.84   18.70   0
 -13   9   4   96.96   18.60   0
  13  -9  -4   86.18    9.92   0
 -11  -9   4   77.46   11.75   0
  11   9  -4   89.71   11.75   0
 -11  -9   4   90.31    9.98   0
  11   9  -4   96.22    9.95   0
 -11   9   4   89.31   16.26   0
 -11   9   4   96.38   15.40   0
  -9  -9   4  110.76   11.45   0
   9   9  -4  114.67   11.43   0
  -9   9   4  123.13   14.62   0
  -9  -9   4  109.76    9.78   0
   9   9  -4  129.87    9.87   0
  -7  -9   4  246.70   12.07   0
   7  -9  -4  258.72   12.71   0
  -7   9   4  272.26   13.75   0
   7   9  -4  248.64   11.83   0
   7   9  -4  256.14   12.19   0
  -7  -9   4  237.23   12.15   0
  -5  -9   4  408.03   10.58   0
  -5  -9   4  332.70   12.80   0
  -5   9   4  421.39   14.28   0
   5  -9  -4  394.98   14.51   0
   5   9  -4  424.12   10.70   0
  -3  -9   4   75.13   12.84   0
  -3  -9   4   70.49   11.02   0
  -3   9   4   85.78   11.58   0
   3  -9  -4   74.81   11.25   0
   3   9  -4   72.26    9.22   0
   1   9  -4 1692.45   14.20   0
  -1   9   4 1766.58   16.90   0
  -1  -9   4 1595.26   15.36   0
  -1  -9   4 1518.78   20.68   0
   1  -9  -4 1840.73   17.82   0
  -1   9  -4   10.54    8.79   0
  -1  -9  -4   19.99   10.93   0
   1  -9   4   12.22    8.63   0
   1   9   4   29.12   11.53   0
  -1  -9  -4   18.12    8.69   0
   1  -9   4   11.41   12.41   0
   3  -9   4 1068.96   12.33   0
   3  -9   4 1007.66   19.23   0
  -3  -9  -4 1017.91   12.43   0
  -3   9  -4 1117.05   12.43   0
   3   9   4 1189.78   13.82   0
  -3  -9  -4 1213.01   15.24   0
   5   9   4    1.57    8.96   0
  -5  -9  -4    0.58   10.88   0
  -5  -9  -4    4.81   11.08   0
  -5   9  -4    0.70    8.74   0
   5  -9   4    6.38   13.85   0
   7   9   4   78.44    9.50   0
  -7  -9  -4   76.37   11.15   0
  -7  -9  -4   79.71   11.49   0
  -7   9  -4   73.85    8.94   0
   7  -9   4   75.37   13.03   0
   9   9   4   61.60    9.33   0
   9  -9   4   60.72   13.38   0
  -9  -9  -4   65.80    9.69   0
  -9   9  -4   50.95    9.12   0
  -9  -9  -4   64.57    9.59   0
  11  -9   4   48.15   12.06   0
  11   9   4   54.25    9.73   0
 -11   9  -4   51.18    9.28   0
 -11  -9  -4   51.64    9.91   0
 -11  -9  -4   49.11    9.73   0
  13   9   4  151.82   10.71   0
  13  -9   4  140.56   13.15   0
 -13  -9  -4  130.00   10.69   0
 -13  -9  -4  149.16   10.73   0
 -13   9  -4  119.88    9.88   0
 -13   9  -4  167.76   12.27   0
  15  -9   4  203.87   13.81   0
 -15  -9  -4  189.70   11.32   0
  15   9   4  211.77   11.00   0
  15   9   4  217.27   13.54   0
 -15  -9  -4  233.33   11.15   0
 -15   9  -4  215.29   12.87   0
 -15   9  -4  182.52   12.97   0
  17   9   4   49.31   11.15   0
  17  -9   4   53.95   13.84   0
 -17  -9  -4   53.72   11.22   0
  17   9   4   55.15   11.58   0
 -17  -9  -4   54.52   11.54   0
 -17   9  -4   73.18   13.10   0
 -17   9  -4   48.40   10.54   0
  19  -9   4   97.66   15.20   0
  19   9   4   83.39   12.07   0
 -19  -9  -4   85.23   14.44   0
 -19  -9  -4  124.25   12.22   0
 -19   9  -4  121.36   11.96   0
  19   9   4  118.81   12.03   0
 -19   9  -4   90.06   11.41   0
 -20 -10   4  118.16   12.36   0
  20  10  -4  163.61   12.72   0
 -20 -10   4  132.20   12.87   0
  20  10  -4  120.96   11.91   0
  18 -10  -4    7.35   10.88   0
 -18 -10   4   19.17   11.18   0
  18  10  -4   11.74   11.57   0
 -18  10   4   11.80   25.67   0
 -18 -10   4   11.63   11.68   0
  18  10  -4   15.18   11.21   0
 -18  10   4    8.28   27.11   0
 -16 -10   4  153.85   11.11   0
 -16  10   4  171.99   23.05   0
 -16 -10   4  150.79   11.87   0
  16  10  -4  164.54   11.08   0
 -16  10   4  157.49   22.71   0
  16  10  -4  149.26   11.63   0
  16 -10  -4  154.18   13.20   0
 -14 -10   4    6.20   12.41   0
  14  10  -4   10.20   10.60   0
 -14 -10   4    5.34   13.18   0
  14  10  -4   -5.61   10.52   0
  14 -10  -4    6.72    9.86   0
 -14  10   4    0.70   19.05   0
 -14  10   4    2.79   17.36   0
 -12 -10   4   16.46   12.06   0
  12  10  -4   13.41    9.83   0
  12  10  -4   18.00   11.86   0
 -12 -10   4   20.20   10.03   0
 -12  10   4    8.79   16.53   0
  12 -10  -4    5.44    9.41   0
 -12  10   4    4.88   16.96   0
 -10 -10   4   28.54   11.72   0
  10  10  -4   27.16    9.42   0
 -10  10   4   25.29   14.42   0
 -10 -10   4   27.18   12.04   0
  10  10  -4   26.23    9.93   0
  -8 -10   4   89.78   11.69   0
  -8  10   4   94.98   12.99   0
   8  10  -4   88.54    9.58   0
   8  10  -4   95.14   10.06   0
  -8 -10   4   90.30    9.70   0
   8 -10  -4   90.60   13.60   0
  -6 -10   4   88.10    9.59   0
  -6 -10   4  102.42   11.82   0
  -6  10   4  108.06   14.43   0
   6 -10  -4   89.09   11.69   0
   6  10  -4  108.04    9.66   0
  -4  10   4    7.97   11.94   0
  -4 -10   4   10.99   11.46   0
  -4 -10   4   19.76    9.02   0
   4  10  -4   11.26    9.15   0
   4 -10  -4   11.70   11.14   0
   2  10  -4   42.53    9.34   0
  -2 -10   4   30.49   11.44   0
  -2  10   4   41.42   11.73   0
   2 -10  -4   35.43   11.11   0
  -2 -10   4   23.07    9.18   0
   0 -10  -4  269.64   12.24   0
   0  10   4  248.58   12.72   0
   0 -10   4  225.60   14.20   0
   0  10  -4  244.66   10.11   0
   0 -10  -4  230.44    9.75   0
   0 -10   4  221.43   11.96   0
  -2 -10  -4    1.39    9.13   0
   2  10   4    9.99    9.51   0
  -2  10  -4    4.56   11.01   0
   2 -10   4    5.13   12.67   0
  -2 -10  -4    2.19    9.03   0
   2 -10   4    9.62    8.91   0
   4 -10   4   38.37    8.72   0
   4  10   4   55.51    9.68   0
  -4 -10  -4   53.50    9.05   0
   4 -10   4   39.61   13.06   0
  -4  10  -4   52.81   10.79   0
  -4 -10  -4   52.83    9.43   0
   6  10   4   68.26    9.70   0
  -6 -10  -4   49.48    9.57   0
  -6  10  -4   58.83    9.06   0
  -6 -10  -4   69.83    9.85   0
   6 -10   4   65.25   13.66   0
   8  10   4   14.72    9.61   0
   8 -10   4    7.68   13.35   0
  -8 -10  -4    9.31    9.53   0
  -8  10  -4   -2.08    8.63   0
  -8 -10  -4    9.79    9.57   0
  10  10   4   61.75   10.02   0
  10 -10   4   62.40   12.26   0
 -10  10  -4   53.71    9.42   0
 -10 -10  -4   66.50    9.90   0
 -10 -10  -4   62.08   10.12   0
  12  10   4   39.94   10.37   0
  12 -10   4   34.17   12.55   0
 -12  10  -4   15.59    9.68   0
 -12 -10  -4   35.73   10.45   0
 -12 -10  -4   33.56   10.06   0
 -14 -10  -4   19.53   10.66   0
 -14  10  -4   18.29   10.32   0
  14 -10   4   15.91   12.90   0
 -14  10  -4   26.20   12.53   0
 -14 -10  -4   13.69   10.69   0
  14  10   4   22.31   10.82   0
  16 -10   4   23.89   13.96   0
 -16 -10  -4   19.42   11.57   0
 -16  10  -4   34.31   13.08   0
 -16 -10  -4   22.86   11.52   0
 -16  10  -4   24.22   13.15   0
  16  10   4   36.10   11.29   0
  18 -10   4    7.56   15.10   0
 -18 -10  -4   22.08   11.67   0
 -18  10  -4   21.20   11.12   0
  18  10   4   19.80   11.76   0
 -18 -10  -4   18.04   12.16   0
 -18  10  -4    6.64   14.15   0
  18  10   4   26.43   11.90   0
  17 -11  -4    3.57   10.98   0
 -17 -11   4   18.74   11.32   0
 -17  11   4    5.30   23.54   0
  17  11  -4    2.47   12.00   0
 -17 -11   4    3.42   11.85   0
  17  11  -4   10.97   11.25   0
 -17  11   4    6.77   24.92   0
 -15 -11   4   25.43   10.83   0
 -15  11   4   28.22   19.04   0
  15 -11  -4   29.63   10.63   0
  15  11  -4   31.04   11.26   0
 -15 -11   4   30.24   13.82   0
  15  11  -4   18.96   13.40   0
 -15  11   4   24.33   20.47   0
  13  11  -4    6.74   10.54   0
  13  11  -4   10.25   10.15   0
 -13 -11   4    5.91   12.90   0
 -13  11   4    3.81   17.96   0
 -13  11   4    4.36   16.57   0
  13 -11  -4   -1.75   10.00   0
 -13 -11   4   12.75   12.71   0
  11  11  -4  128.85   13.28   0
  11  11  -4  113.58   10.36   0
 -11  11   4  125.49   16.12   0
 -11 -11   4  130.01   10.75   0
 -11 -11   4  123.03   10.36   0
  -9  11   4   43.17   14.72   0
   9  11  -4   32.24   11.98   0
   9  11  -4   33.86   10.11   0
  -9 -11   4   44.14   10.11   0
  -9 -11   4   35.87   12.15   0
   7 -11  -4   98.15   12.04   0
  -7 -11   4  113.01   12.41   0
  -7  11   4  123.98   13.22   0
   7  11  -4  120.26   10.25   0
  -7 -11   4  127.97   10.14   0
  -5 -11   4   14.92    9.70   0
  -5 -11   4   22.78   11.85   0
   5 -11  -4   20.12   11.44   0
  -5  11   4   15.44   12.45   0
   5  11  -4   20.06   11.89   0
  -3 -11   4   43.81   12.04   0
  -3 -11   4   49.33    9.67   0
  -3  11   4   47.86   12.32   0
   3  11  -4   47.41    9.70   0
   3 -11  -4   45.79   11.59   0
  -1  11   4    6.42   11.95   0
   1  11  -4    9.21    9.38   0
  -1 -11   4    1.14   13.68   0
   1 -11  -4    2.52    9.34   0
  -1 -11   4   -0.69    9.41   0
  -1 -11  -4  107.61    9.69   0
  -1  11  -4   94.94    9.62   0
   1 -11   4   95.23    9.44   0
   1  11   4   94.64   12.31   0
   1 -11   4   87.65   12.17   0
  -1 -11  -4   85.15    9.37   0
  -3 -11  -4   25.41   12.00   0
   3  11   4   33.14   12.07   0
  -3  11  -4   29.49   11.39   0
   3 -11   4   20.74   13.57   0
  -3 -11  -4    9.82   11.31   0
   3 -11   4   32.34   11.45   0
   5 -11   4   99.45    9.54   0
  -5 -11  -4  111.85    9.94   0
  -5 -11  -4  130.12   10.40   0
  -5  11  -4  115.40    9.61   0
   5  11   4  122.58   12.40   0
   5 -11   4  101.83   14.14   0
   5 -11   4  108.52   14.22   0
   7  11   4   -4.88   10.17   0
  -7 -11  -4   -2.20    9.70   0
  -7  11  -4    7.67    9.23   0
  -7 -11  -4    2.00   10.07   0
   7 -11   4    2.68   15.14   0
   9 -11   4   12.29   14.02   0
   9  11   4   15.02    9.99   0
  -9 -11  -4   13.47    9.91   0
  -9  11  -4   24.14    9.23   0
  -9 -11  -4   20.34    9.92   0
  11  11   4   61.85   10.51   0
 -11 -11  -4   48.87   10.46   0
  11 -11   4   45.34   14.71   0
 -11 -11  -4   53.39   10.55   0
 -11  11  -4   49.90    9.92   0
  13 -11   4    1.48   13.20   0
 -13 -11  -4  -10.06   10.84   0
 -13  11  -4    7.68   10.42   0
  13  11   4    2.12   10.51   0
 -13  11  -4    7.42   12.54   0
 -13 -11  -4   11.74   10.69   0
  15 -11   4   28.76   14.04   0
 -15  11  -4   22.39   13.38   0
 -15  11  -4   22.67   11.12   0
 -15 -11  -4   24.12   11.40   0
 -15 -11  -4   13.21   11.57   0
  15  11   4   24.24   11.33   0
  17 -11   4    7.37   17.10   0
 -17  11  -4    7.69   11.22   0
 -17 -11  -4   -7.31   12.12   0
 -17  11  -4   -9.70   11.63   0
 -17 -11  -4    7.62   12.31   0
  17  11   4   14.60   14.50   0
  16 -12  -4   62.81   11.61   0
  16  12  -4   61.20   12.18   0
 -16  12   4   69.05   20.50   0
 -16 -12   4   53.03   12.35   0
  16  12  -4   68.55   11.62   0
 -16  12   4   66.58   22.29   0
 -16 -12   4   49.51   14.34   0
  14 -12  -4   -9.66   10.66   0
 -14 -12   4   -8.24   13.54   0
  14  12  -4    5.85   13.62   0
  14  12  -4    0.39   10.97   0
 -14 -12   4   -8.67   11.31   0
 -14  12   4    6.81   18.64   0
 -14  12   4    3.57   17.15   0
 -12 -12   4  112.09   11.21   0
  12  12  -4  148.72   11.37   0
 -12  12   4  129.46   16.99   0
  12  12  -4  125.42   13.51   0
  12 -12  -4  110.65   12.84   0
 -12 -12   4  132.08   13.73   0
 -10 -12   4   98.34   13.05   0
 -10  12   4   83.37   15.97   0
  10  12  -4   87.80   10.85   0
 -10 -12   4   81.87   10.72   0
  -8 -12   4  213.53   13.21   0
   8 -12  -4  213.37   13.46   0
  -8  12   4  247.80   14.38   0
   8  12  -4  241.58   11.30   0
  -8 -12   4  232.14   11.00   0
  -6 -12   4  101.83   12.71   0
  -6 -12   4   90.37   12.77   0
  -6  12   4  110.79   15.25   0
   6 -12  -4   89.04   11.97   0
   6  12  -4   93.04   10.48   0
   4 -12  -4  159.18   10.42   0
  -4 -12   4  148.04   13.28   0
  -4 -12   4  151.13   10.43   0
  -4  12   4  193.06   13.55   0
   4  12  -4  179.07   10.41   0
  -2  12   4   25.07   12.38   0
  -2 -12   4   10.59    9.73   0
   2  12  -4   17.99    9.69   0
   2 -12  -4   24.64   11.90   0
  -2 -12   4   17.79   12.31   0
   0  12  -4   60.03    9.79   0
   0  12   4   66.01   12.80   0
   0 -12   4   63.60   14.10   0
   0 -12  -4   67.96   10.03   0
   0 -12  -4   44.96    9.57   0
   0 -12   4   52.58    9.79   0
  -2 -12  -4  110.55   10.22   0
   2  12   4  120.73   12.83   0
   2 -12   4   92.29   14.46   0
  -2 -12  -4   93.75   10.00   0
   2 -12   4  109.86    9.90   0
  -2  12  -4  103.21   10.10   0
  -4  12  -4  123.66    9.80   0
   4  12   4  134.43   13.28   0
  -4 -12  -4   98.31   10.01   0
   4 -12   4  111.98   14.97   0
   4 -12   4  128.90    9.93   0
  -4 -12  -4  132.25   10.63   0
   6  12   4  325.03   13.57   0
  -6 -12  -4  268.36   10.78   0
  -6  12  -4  276.98   10.52   0
   6 -12   4  244.41   15.76   0
  -6 -12  -4  328.02   13.59   0
   6 -12   4  294.71   16.00   0
   8 -12   4  240.98   15.67   0
   8  12   4  263.94   13.57   0
  -8 -12  -4  231.63   10.85   0
  -8  12  -4  248.87   12.71   0
  -8 -12  -4  266.23   11.51   0
  10 -12   4  196.95   15.83   0
  10  12   4  202.43   11.34   0
 -10 -12  -4  175.64   11.11   0
 -10  12  -4  166.93   12.86   0
 -10 -12  -4  200.02   11.31   0
  12  12   4   79.21   11.53   0
  12 -12   4   68.62   13.64   0
 -12 -12  -4   68.18   11.15   0
 -12  12  -4   67.15   10.95   0
 -12 -12  -4   70.52   11.35   0
  14  12   4  119.10   11.74   0
  14 -12   4  108.91   14.55   0
 -14 -12  -4   88.19   11.60   0
 -14  12  -4  116.69   11.70   0
 -14  12  -4   86.49   11.48   0
 -14 -12  -4  126.80   11.95   0
 -16 -12  -4   -1.22   12.39   0
 -16  12  -4    4.81   11.73   0
  16  12   4   12.51   12.15   0
 -15 -13   4   13.36   14.88   0
  15  13  -4   17.43   12.29   0
  15 -13  -4    8.61   11.62   0
 -15  13   4    9.74   20.61   0
  15  13  -4    4.11   14.60   0
 -15 -13   4    6.10   15.43   0
 -15  13   4   11.78   18.98   0
 -13 -13   4  337.28   12.79   0
  13  13  -4  393.38   12.91   0
 -13  13   4  355.15   21.48   0
  13  13  -4  335.26   15.04   0
 -13  13   4  401.87   19.99   0
 -13 -13   4  334.82   12.82   0
  13 -13  -4  372.06   12.24   0
 -11 -13   4   29.56   13.70   0
  11  13  -4   27.65   11.12   0
 -11  13   4   29.00   16.66   0
 -11 -13   4   28.18   13.78   0
  -9 -13   4  369.66   14.49   0
  -9  13   4  433.28   16.35   0
   9  13  -4  445.20   12.42   0
  -9 -13   4  384.69   12.16   0
  -7 -13   4   41.83   10.63   0
  -7  13   4   57.68   13.67   0
   7 -13  -4   36.34   14.78   0
   7  13  -4   37.90   10.77   0
  -7 -13   4   31.76   13.03   0
  -5 -13   4  257.85   11.21   0
  -5  13   4  283.96   14.63   0
   5 -13  -4  268.78   13.63   0
  -5 -13   4  263.59   14.19   0
   5  13  -4  270.91   11.34   0
  -3 -13   4   24.53   14.96   0
  -3 -13   4   35.79   10.45   0
  -3  13   4   37.82   12.95   0
   3  13  -4   30.32   12.71   0
   3 -13  -4   35.69   10.25   0
  -1 -13   4  247.77   14.06   0
  -1  13   4  297.18   13.93   0
   1 -13  -4  258.13   10.80   0
   1 -13  -4  275.93   13.45   0
  -1 -13   4  261.56   13.41   0
   1  13  -4  289.57   11.23   0
  -1  13  -4    6.81    9.98   0
   1 -13   4   13.75    9.82   0
   1  13   4    2.72   10.67   0
   1 -13   4    4.62   12.69   0
  -1 -13  -4    2.33   10.19   0
  -1 -13  -4    7.27    9.85   0
  -3  13  -4  324.00   11.29   0
   3  13   4  314.16   11.96   0
  -3 -13  -4  292.02   11.46   0
   3 -13   4  251.93   10.97   0
   3 -13   4  257.91   15.93   0
  -3 -13  -4  243.09   10.63   0
  -5 -13  -4   11.14   10.85   0
   5 -13   4    8.37   10.05   0
   5  13   4    7.31   10.71   0
  -5  13  -4    7.16   10.14   0
  -5 -13  -4   12.30    9.93   0
   5 -13   4    3.98   14.72   0
   5 -13   4    7.80   14.71   0
  -7 -13  -4  244.39   11.81   0
   7  13   4  246.72   13.92   0
  -7  13  -4  189.54   10.91   0
  -7 -13  -4  203.97   11.20   0
   7 -13   4  180.49   16.05   0
   7 -13   4  215.03   15.89   0
   9 -13   4   -3.01   15.41   0
  -9 -13  -4    8.06   11.05   0
   9  13   4   10.91   11.11   0
  -9 -13  -4   20.78   12.83   0
  -9  13  -4    3.06   10.25   0
  11 -13   4   98.31   16.34   0
  11  13   4   98.95   11.68   0
 -11 -13  -4   77.21   11.46   0
 -11  13  -4   94.21   11.09   0
 -11 -13  -4  103.23   11.74   0
  13  13   4   20.07   11.68   0
  13 -13   4   28.76   14.73   0
 -13 -13  -4   35.44   14.56   0
 -13 -13  -4   40.98   11.78   0
 -13  13  -4   26.28   11.41   0
 -12 -14   4   22.19   11.82   0
 -12  14   4   13.16   18.06   0
  12 -14  -4   24.16   11.61   0
  12  14  -4   29.01   12.38   0
 -12 -14   4    3.25   12.45   0
 -10 -14   4    8.01   14.30   0
  10  14  -4   21.10   11.67   0
 -10 -14   4   27.30   14.39   0
 -10  14   4   15.84   14.95   0
  -8 -14   4   50.50   11.49   0
  -8 -14   4   45.74   14.03   0
  -8  14   4   56.69   16.87   0
   8 -14  -4   51.95   13.69   0
   8  14  -4   72.21   11.37   0
  -6 -14   4   51.67   10.96   0
   6 -14  -4   45.43   13.20   0
  -6 -14   4   36.68   13.80   0
  -6  14   4   49.82   14.10   0
   6  14  -4   38.06   11.03   0
  -4 -14   4  106.14   13.81   0
   4 -14  -4   99.27   13.58   0
  -4  14   4  114.56   14.45   0
  -4 -14   4  110.34   11.11   0
   4  14  -4  126.97   11.08   0
  -2 -14   4   81.76   14.02   0
   2 -14  -4   96.67   10.93   0
   2 -14  -4   67.88   10.81   0
  -2 -14   4  101.81   10.97   0
  -2  14   4   95.89   13.91   0
   2  14  -4   81.04   13.23   0
   0 -14   4  128.00   10.85   0
   0  14   4  126.03   11.88   0
   0 -14   4  102.92   15.77   0
   0  14  -4  111.45   13.15   0
   0 -14  -4   93.46   10.53   0
   0 -14  -4  120.63   13.46   0
  -2  14  -4   91.53   10.74   0
   2  14   4  116.76   14.07   0
   2 -14   4   95.34   15.72   0
  -2 -14  -4  104.08   11.39   0
  -2 -14  -4   81.51   10.46   0
   2 -14   4   96.81   13.06   0
  -4  14  -4   70.51   10.86   0
   4  14   4   82.43   11.67   0
  -4 -14  -4   65.64   13.72   0
   4 -14   4   59.71   15.66   0
  -4 -14  -4   57.78   10.70   0
   4 -14   4   57.09   13.14   0
   6  14   4   79.90   11.86   0
  -6 -14  -4   84.29   11.62   0
  -6  14  -4   65.15   10.99   0
  -6 -14  -4   88.72   13.19   0
   6 -14   4   72.32   15.83   0
   6 -14   4   83.74   14.08   0
  -8 -14  -4   79.39   11.71   0
   8  14   4   81.88   11.75   0
  -8  14  -4   93.40   11.17   0
  -8 -14  -4   74.93   11.36   0
   8 -14   4   59.26   16.38   0
   8 -14   4   68.58   16.38   0
  10  14   4   44.61   14.59   0
 -10 -14  -4   45.55   11.55   0
 -10  14  -4   47.90   11.29   0
  10 -14   4   49.84   16.65   0
 -10 -14  -4   66.59   12.00   0
 -12 -14  -4   84.34   12.29   0
  12  14   4   81.63   12.46   0
 -12  14  -4   86.44   11.91   0
 -12 -14  -4  108.75   12.75   0
  -9 -15   4    7.55   15.00   0
  -9 -15   4    2.85   14.93   0
  -9  15   4    7.37   17.61   0
   9  15  -4    9.17   12.12   0
  -7 -15   4   21.52   11.75   0
  -7 -15   4   12.68   14.38   0
  -7  15   4   16.17   15.22   0
   7  15  -4   26.01   11.86   0
   7 -15  -4   15.55   14.08   0
  -5 -15   4   10.11   14.50   0
  -5  15   4   10.89   14.99   0
  -5 -15   4   10.97   11.41   0
   5  15  -4   11.82   14.15   0
   5 -15  -4    9.74   13.91   0
   3 -15  -4    8.52   11.24   0
  -3 -15   4    2.66   14.14   0
  -3  15   4   20.51   14.56   0
   3 -15  -4   13.38   11.06   0
  -3 -15   4   12.88   11.28   0
   3  15  -4   23.70   11.26   0
  -1 -15   4    2.11   14.15   0
  -1  15   4    2.52   14.31   0
   1 -15  -4    6.07   13.57   0
   1 -15  -4    7.00   13.09   0
   1  15  -4   11.72   11.25   0
  -1 -15   4  -14.64   11.10   0
  -1  15  -4   -0.88   10.77   0
   1  15   4    3.28   11.86   0
   1 -15   4   16.36   15.95   0
   1 -15   4   -2.85   10.90   0
  -1 -15  -4   -2.73   13.37   0
  -1 -15  -4    3.07   13.80   0
   3  15   4    0.08   14.45   0
  -3  15  -4   16.32   11.10   0
   3 -15   4   11.36   13.77   0
   3 -15   4   15.56   16.14   0
  -3 -15  -4    8.13   11.23   0
  -3 -15  -4    9.56   11.32   0
  -5  15  -4    0.87   13.70   0
   5  15   4   19.21   11.77   0
  -5 -15  -4    6.31   11.52   0
  -5 -15  -4   15.93   10.99   0
   5 -15   4   11.28   16.50   0
   5 -15   4    6.60   13.91   0
   5 -15   4   10.33   16.43   0
   7  15   4   13.31   14.66   0
  -7  15  -4   25.33   11.44   0
  -7 -15  -4   19.29   12.08   0
  -7 -15  -4   23.12   11.33   0
   7 -15   4    8.39   16.85   0
   7 -15   4   14.32   16.68   0
   9 -15   4   47.19   17.57   0
   9  15   4   51.35   12.44   0
  -9 -15  -4   29.34   12.45   0
  -9  15  -4   31.44   11.83   0
  -9 -15  -4   20.15   11.78   0
   9 -15   4   25.60   17.49   0
   6  16  -4   33.22   12.23   0
   6 -16  -4   26.72   14.98   0
  -4 -16   4   60.61   15.45   0
  -4  16   4   57.19   15.84   0
   4 -16  -4   38.89   11.81   0
   4 -16  -4   55.75   14.69   0
  -4 -16   4   51.25   12.36   0
   4  16  -4   66.87   14.86   0
   2 -16  -4   34.60   12.20   0
  -2 -16   4   28.90   17.65   0
  -2  16   4   28.69   15.33   0
  -2 -16   4   33.08   14.52   0
   2 -16  -4   40.45   14.15   0
   2  16  -4   41.40   11.74   0
   0 -16  -4   24.30   14.55   0
   0  16   4   30.64   15.06   0
   0 -16   4   27.96   15.28   0
   0 -16   4   23.16   11.95   0
   0 -16  -4   23.28   11.56   0
   0  16  -4   25.09   14.77   0
   2 -16   4   63.15   12.05   0
   2  16   4   75.09   15.50   0
   2 -16   4   53.42   17.44   0
  -2 -16  -4   46.77   11.85   0
  -2 -16  -4   59.98   12.32   0
  -2  16  -4   54.60   11.65   0
  -4  16  -4   41.42   12.15   0
   4  16   4   59.37   12.69   0
   4 -16   4   44.03   17.46   0
   4 -16   4   32.37   12.11   0
  -4 -16  -4   24.72   11.71   0
  -4 -16  -4   40.46   12.25   0
 -23   1   5   80.60   17.89   0
 -23  -1   5   82.90   15.63   0
 -23  -1   5   71.47   13.99   0
  23  -1  -5   79.32   11.33   0
  23  -1  -5  100.26   16.00   0
  23   1  -5   68.81   11.13   0
  23   1  -5   93.42   14.27   0
  21  -1  -5   16.24   10.24   0
  21   1  -5   16.44   10.26   0
 -21  -1   5   21.49   14.60   0
 -21   1   5   37.23   16.83   0
  21  -1  -5   33.85   12.86   0
  21   1  -5   26.59   14.92   0
 -21  -1   5   29.72   12.67   0
 -19   1   5   47.56   15.88   0
 -19  -1   5   41.06   13.45   0
  19  -1  -5   35.97    9.56   0
  19   1  -5   32.78    9.78   0
  19  -1  -5   33.59   13.95   0
 -19  -1   5   30.53    9.98   0
  19   1  -5   44.35   12.40   0
  17   1  -5   65.49   11.73   0
 -17  -1   5   60.16   12.69   0
  17   1  -5   66.25    9.23   0
  17  -1  -5   75.59    9.30   0
 -17   1   5   66.56   14.95   0
  17  -1  -5   83.31   13.73   0
 -17  -1   5   63.62    9.62   0
  15  -1  -5  179.00    9.45   0
  15   1  -5  205.15   12.42   0
  15   1  -5  191.13   11.00   0
 -15   1   5  188.73   14.62   0
 -15  -1   5  182.60   12.73   0
  15  -1  -5  224.82   13.93   0
 -15  -1   5  180.20    9.50   0
  13  -1  -5  110.83    8.54   0
  13   1  -5  107.36    8.77   0
  13   1  -5  124.66   12.01   0
  13  -1  -5  122.36   14.41   0
 -13  -1   5  107.69   11.81   0
 -13   1   5  100.09   14.60   0
 -13  -1   5  100.43    8.88   0
  11  -1  -5 1382.41   13.32   0
  11  -1  -5 1734.98   24.59   0
  11   1  -5 1483.11   13.55   0
  11   1  -5 1594.30   20.31   0
 -11  -1   5 1345.48   18.18   0
 -11   1   5 1471.01   23.36   0
 -11  -1   5 1376.86   13.45   0
   9   1  -5  158.16   10.49   0
   9  -1  -5  180.88   15.50   0
   9  -1  -5  159.89    9.08   0
   9   1  -5  185.03   13.48   0
  -9   1   5  155.12   14.09   0
  -9  -1   5  152.43   11.31   0
  -9  -1   5  156.72   10.58   0
   7   1  -5 3443.32   20.25   0
  -7  -1   5 3235.99   24.70   0
   7  -1  -5 3808.83   37.31   0
   7  -1  -5 3383.39   19.66   0
   7   1  -5 3348.98   26.36   0
   5   1  -5   54.96   10.22   0
  -5  -1   5   53.35   10.03   0
   5   1  -5   53.86    7.90   0
   5  -1  -5   58.58   13.43   0
   3   1  -5 1007.91   15.53   0
   3  -1  -5  962.98   18.26   0
   3   1  -5 1040.16   16.30   0
   3  -1  -5 1235.49   18.28   0
   1   1  -5  264.70    9.90   0
   1  -1  -5  335.12   11.80   0
  -1  -1  -5  236.11   10.94   0
  -3   1  -5   10.94   10.28   0
  -3  -1  -5    8.98    9.73   0
   3   1   5    7.77    8.01   0
  -3   1  -5   16.58    9.83   0
  -3  -1  -5   10.92    8.01   0
  -5   1  -5 1460.60   19.11   0
  -5  -1  -5 1373.53   15.31   0
   5  -1   5 1369.72   19.22   0
   5   1   5 1686.64   15.06   0
  -5   1  -5 1772.97   14.91   0
  -5  -1  -5 1716.06   15.02   0
  -7   1  -5  520.08   13.49   0
  -7  -1  -5  647.57   10.77   0
  -7  -1  -5  524.15   12.31   0
   7  -1   5  523.75   13.64   0
   7   1   5  541.90   10.88   0
   7   1   5  624.77   12.26   0
  -7   1  -5  646.01   10.88   0
  -9  -1  -5  853.03   13.82   0
  -9   1  -5  886.77   14.42   0
  -9  -1  -5 1012.78   13.37   0
   9  -1   5  793.87   14.42   0
   9   1   5  803.00   12.23   0
   9   1   5  966.25   11.78   0
  -9   1  -5 1037.22   12.06   0
 -11  -1  -5   33.89    8.54   0
 -11   1  -5   22.88    8.51   0
 -11  -1  -5   22.50    8.69   0
 -11   1  -5   21.95   10.53   0
  11  -1   5   24.46   10.58   0
  11   1   5   23.68   10.97   0
  11   1   5   30.09   10.30   0
 -13  -1  -5  275.56    9.76   0
 -13   1  -5  232.80   11.52   0
 -13  -1  -5  224.29    9.70   0
  13  -1   5  230.53   11.97   0
  13   1   5  208.00    9.84   0
  13   1   5  268.65    9.61   0
 -13   1  -5  271.72    9.83   0
 -15   1  -5  292.17   10.30   0
 -15  -1  -5  345.66   10.53   0
 -15  -1  -5  284.87   10.32   0
  15  -1   5  267.02   12.35   0
  15   1   5  277.05   10.61   0
  15   1   5  354.48   10.22   0
 -15   1  -5  329.55   10.11   0
 -17   1  -5  212.31   12.17   0
 -17   1  -5  187.12   12.40   0
 -17  -1  -5  177.20   12.44   0
 -17  -1  -5  191.70   10.49   0
  17  -1   5  161.39   10.39   0
  17   1   5  160.70   12.62   0
  17   1   5  191.24   10.31   0
 -19   1  -5  244.11   10.74   0
 -19  -1  -5  228.25   13.02   0
 -19  -1  -5  298.58   11.08   0
  19  -1   5  227.39   10.79   0
  19   1   5  195.58   11.22   0
 -19   1  -5  234.45   10.71   0
  19   1   5  248.39   10.65   0
 -21   1  -5  112.82   11.28   0
 -21   1  -5  145.42   11.32   0
 -21  -1  -5  151.36   11.33   0
 -21  -1  -5  111.75   11.71   0
  21  -1   5  114.94   11.48   0
  21   1   5  111.33   13.45   0
  21   1   5  143.52   10.97   0
 -23  -1  -5   11.38   11.90   0
 -23  -1  -5   31.25   12.15   0
  23   1   5   14.41   11.81   0
 -23   1  -5   15.44   11.98   0
 -24   2   5    9.33   18.46   0
 -24  -2   5    5.50   15.65   0
  24  -2  -5    9.57   11.74   0
 -24  -2   5    2.48   11.92   0
  24   2  -5    9.47   11.17   0
  24   2  -5    5.95   14.19   0
 -22   2   5  221.79   18.82   0
 -22  -2   5  229.77   15.34   0
  22  -2  -5  210.35   11.33   0
  22   2  -5  232.18   13.28   0
 -22  -2   5  226.83   11.40   0
  22   2  -5  242.10   14.05   0
 -20   2   5   22.06   16.35   0
  20  -2  -5   22.08   11.98   0
 -20  -2   5   15.79   13.67   0
  20   2  -5    7.83    9.92   0
 -20  -2   5   33.63   10.23   0
  20   2  -5   19.54   12.42   0
 -18   2   5   20.03   16.53   0
  18   2  -5   25.99   11.77   0
  18  -2  -5   19.84   11.49   0
 -18  -2   5   30.32   13.18   0
  18   2  -5   18.18    9.38   0
  18  -2  -5   22.45   13.38   0
 -18  -2   5   34.04    9.76   0
  16  -2  -5   89.19    9.19   0
  16   2  -5  102.97   11.77   0
  16   2  -5   86.44    8.98   0
 -16   2   5   94.10   16.26   0
 -16  -2   5   86.46   12.31   0
  16  -2  -5  103.27   15.03   0
 -16  -2   5   85.27   11.04   0
  14  -2  -5  135.77    9.18   0
  14   2  -5  162.03   12.09   0
 -14  -2   5  140.69   12.09   0
 -14   2   5  139.54   16.66   0
 -14  -2   5  140.93    9.11   0
  14  -2  -5  156.14   14.57   0
  14   2  -5  133.82    8.82   0
  12   2  -5  154.55    8.74   0
  12   2  -5  176.50   11.87   0
 -12  -2   5  157.44   11.71   0
 -12  -2   5  152.05    8.94   0
 -12   2   5  164.10   18.59   0
  12  -2  -5  193.42   17.26   0
  12  -2  -5  170.07    9.05   0
  10   2  -5  887.08   11.80   0
 -10  -2   5  909.59   11.87   0
  10   2  -5 1091.83   16.04   0
 -10  -2   5  940.18   15.26   0
  10  -2  -5 1096.03   35.81   0
  10  -2  -5  946.71   11.83   0
   8   2  -5   74.95    7.94   0
   8   2  -5   80.83   11.03   0
   8  -2  -5   80.95   10.00   0
  -8  -2   5   70.46   10.77   0
  -8  -2   5   80.20    9.83   0
   6   2  -5 1731.08   16.34   0
   6  -2  -5 2002.48   39.64   0
  -6  -2   5 1680.12   16.93   0
   6  -2  -5 2188.73   38.85   0
   6   2  -5 1973.23   19.02   0
   4   2  -5  110.40   10.19   0
  -4  -2   5  116.80   10.23   0
   4   2  -5  119.08   10.40   0
   4  -2  -5  109.19   12.78   0
   4  -2  -5  140.56   12.80   0
   2   2  -5 1147.35   14.05   0
   2  -2  -5 1343.01   19.67   0
  -2  -2   5 1081.35   13.86   0
   2   2  -5 1262.78   19.93   0
   0   2  -5  633.80   12.95   0
   0   2   5  789.85   14.62   0
   0  -2  -5  842.64   14.30   0
  -2   2  -5  678.91   20.15   0
  -2   2  -5  693.21   11.65   0
  -2  -2  -5  651.01   13.34   0
   2   2   5  784.83   13.81   0
  -2  -2  -5  793.79   12.32   0
  -4   2  -5 1178.18   22.14   0
  -4  -2  -5 1080.33   14.73   0
  -4   2  -5 1405.12   14.01   0
   4   2   5 1353.82   13.80   0
  -4  -2  -5 1452.14   14.06   0
  -6   2  -5  662.90   14.86   0
  -6  -2  -5  605.18   12.44   0
   6  -2   5  607.47   16.01   0
  -6   2  -5  777.54   11.30   0
   6   2   5  753.08   11.54   0
  -6  -2  -5  748.64   11.45   0
  -8  -2  -5 1753.13   14.13   0
  -8   2  -5 1432.55   17.60   0
  -8  -2  -5 1447.09   15.31   0
   8  -2   5 1381.07   17.95   0
   8   2   5 1337.17   13.80   0
   8   2   5 1640.20   13.85   0
  -8   2  -5 1667.44   14.06   0
 -10  -2  -5  562.32   10.46   0
 -10   2  -5  503.98   11.19   0
 -10  -2  -5  489.67   12.44   0
  10  -2   5  493.80   13.08   0
  10   2   5  451.07   10.68   0
  10   2   5  557.62   10.36   0
 -10   2  -5  570.96   10.37   0
 -12   2  -5  501.66   10.98   0
 -12  -2  -5  588.75   10.86   0
 -12  -2  -5  510.11   12.43   0
  12  -2   5  454.61   13.12   0
  12   2   5  470.70   10.71   0
  12   2   5  568.30   10.49   0
 -12   2  -5  588.89   10.70   0
 -14  -2  -5   82.63    9.42   0
 -14  -2  -5   68.50    9.01   0
  14  -2   5   74.23   11.49   0
  14   2   5   66.44    9.29   0
 -14   2  -5   68.70   11.17   0
  14   2   5   87.71    9.19   0
 -14   2  -5   83.16   11.14   0
 -16   2  -5   89.86   11.83   0
 -16  -2  -5   79.57    9.54   0
 -16  -2  -5  120.44   12.01   0
  16  -2   5  100.43    9.97   0
  16   2   5   88.32   11.80   0
  16   2   5  114.40    9.63   0
 -16   2  -5  109.86    9.55   0
 -18   2  -5    4.73    9.89   0
 -18   2  -5    2.64   10.09   0
 -18  -2  -5   14.46   10.00   0
 -18  -2  -5   -0.20   10.20   0
  18  -2   5   12.28   12.49   0
  18   2   5    1.47    9.76   0
  18   2   5    4.06   10.09   0
 -20   2  -5  158.33   10.97   0
 -20  -2  -5  136.73   11.17   0
 -20  -2  -5  150.23   11.27   0
  20  -2   5  127.20   13.56   0
 -20   2  -5  140.66   11.37   0
  20   2   5  129.35   11.28   0
  20   2   5  148.16   11.13   0
 -22  -2  -5   32.66   11.47   0
 -22   2  -5   18.37   11.68   0
 -22  -2  -5   28.81   11.87   0
  22  -2   5   31.38   14.03   0
  22   2   5   32.10   11.42   0
  22   2   5   28.95   11.54   0
 -22   2  -5   31.32   11.60   0
 -23   3   5  129.46   18.92   0
  23   3  -5  133.33   11.46   0
  23  -3  -5  152.61   14.12   0
 -23  -3   5  123.36   15.70   0
 -23  -3   5  114.45   14.38   0
  23   3  -5  141.23   11.95   0
 -21   3   5   43.81   18.99   0
  21  -3  -5   42.25   10.59   0
 -21  -3   5   46.85   14.29   0
  21   3  -5   37.15   10.35   0
 -21  -3   5   54.74   10.76   0
  21   3  -5   49.50   12.90   0
  19   3  -5  578.29   12.53   0
  19  -3  -5  527.53   13.32   0
 -19   3   5  548.50   22.13   0
 -19  -3   5  536.78   15.60   0
  19   3  -5  482.63   11.16   0
 -19  -3   5  496.96   11.68   0
  17   3  -5    5.64   11.76   0
 -17   3   5    5.98   17.15   0
  17   3  -5   11.94   11.09   0
 -17  -3   5    8.75    9.99   0
 -17  -3   5    7.62    9.20   0
  17  -3  -5    8.97    9.29   0
  15  -3  -5  891.02   11.72   0
  15   3  -5  866.99   11.59   0
  15   3  -5 1018.07   13.91   0
 -15  -3   5  931.06   15.44   0
 -15   3   5  957.25   26.68   0
 -15  -3   5  878.38   11.78   0
  13  -3  -5    4.88    8.55   0
  13   3  -5    7.97    8.23   0
  13   3  -5    8.12   11.05   0
 -13  -3   5   12.06   10.85   0
 -13  -3   5   16.96   10.23   0
  11   3  -5 1053.36   12.36   0
 -11  -3   5 1087.38   13.99   0
  11   3  -5 1184.63   15.70   0
  11  -3  -5 1149.20   12.45   0
 -11  -3   5 1074.63   14.19   0
   9  -3  -5   25.50    8.43   0
   9   3  -5   20.39    7.68   0
   9   3  -5   17.49    8.39   0
  -9  -3   5   19.49    8.38   0
  -9  -3   5   13.24    9.77   0
  -7  -3   5  999.56   14.69   0
   7   3  -5 1105.63   14.11   0
  -7  -3   5 1017.73   13.24   0
   7   3  -5  974.06   12.92   0
   5   3  -5    6.28    8.06   0
   5  -3  -5    7.01   19.38   0
  -5  -3   5    4.24    7.92   0
   5  -3  -5    5.70   17.01   0
   5   3  -5    7.17    7.93   0
  -5  -3   5    4.60   10.07   0
   3  -3  -5 1076.65   20.27   0
  -3  -3   5  873.39   13.57   0
   3   3  -5  886.18   17.29   0
   3   3  -5  845.55   14.11   0
   1  -3  -5   33.62   10.22   0
   1   3  -5   27.72   14.19   0
  -1  -3   5   25.53    8.16   0
   1   3  -5   29.65    8.27   0
  -1   3   5   38.34   10.13   0
  -1  -3  -5 1178.81   15.23   0
  -1   3  -5  883.42   13.78   0
   1   3   5 1077.00   15.31   0
  -3   3  -5    9.16   17.77   0
  -3  -3  -5   11.52    7.96   0
  -3   3  -5    5.36    8.03   0
  -3  -3  -5    6.34    8.10   0
   3   3   5    9.28    7.70   0
  -5  -3  -5  803.14   13.23   0
  -5   3  -5  721.81   18.99   0
  -5   3  -5  666.55   10.92   0
  -5  -3  -5  671.89   11.53   0
   5  -3   5  693.46   18.95   0
  -5   3  -5  857.17   11.73   0
   5   3   5  769.89   11.62   0
  -7   3  -5   39.41   11.61   0
  -7  -3  -5   56.37    8.65   0
  -7  -3  -5   34.11    8.47   0
   7  -3   5   38.54   12.39   0
   7   3   5   44.61    8.59   0
  -7   3  -5   49.72    8.38   0
   7   3   5   43.96    8.08   0
  -9  -3  -5  385.15   11.73   0
  -9   3  -5  337.67   13.57   0
  -9  -3  -5  311.87   10.11   0
   9  -3   5  324.91   12.78   0
   9   3   5  320.61   10.01   0
  -9   3  -5  410.93   11.65   0
   9   3   5  380.78    9.83   0
 -11  -3  -5   63.56    8.96   0
  11  -3   5   64.42   11.36   0
 -11   3  -5   69.17   10.50   0
  11   3   5   62.94    8.80   0
  11   3   5   77.05    8.90   0
 -11   3  -5   75.55    8.81   0
 -11  -3  -5   74.88    9.21   0
 -13   3  -5  336.86   12.30   0
 -13  -3  -5  385.81   12.14   0
 -13  -3  -5  288.05    9.98   0
  13  -3   5  303.65   12.63   0
  13   3   5  280.24    9.91   0
  13   3   5  374.04   10.06   0
 -13   3  -5  387.44   10.14   0
 -15  -3  -5   14.99   11.65   0
 -15   3  -5    0.21   11.25   0
 -15  -3  -5    3.86    9.18   0
  15  -3   5    7.90   11.67   0
  15   3   5    0.31    9.12   0
  15   3   5    1.44    9.27   0
 -15   3  -5   -5.78    9.29   0
 -17  -3  -5  207.78   10.19   0
 -17   3  -5  240.44   12.57   0
  17  -3   5  211.92   12.77   0
  17   3   5  219.90   10.41   0
  17   3   5  268.11   10.66   0
 -17   3  -5  271.72   12.43   0
 -17  -3  -5  273.41   11.11   0
 -19   3  -5   32.63   10.20   0
 -19  -3  -5   20.41   10.42   0
 -19  -3  -5   16.13   10.74   0
  19  -3   5   31.97   13.12   0
  19   3   5   30.52   10.21   0
  19   3   5   32.89   12.72   0
 -19   3  -5   27.74   10.54   0
 -21   3  -5  107.81   11.79   0
 -21  -3  -5   85.01   11.29   0
 -21  -3  -5  110.83   14.60   0
  21  -3   5   71.42   14.34   0
  21   3   5   74.47   11.50   0
  21   3   5  105.51   13.93   0
 -21   3  -5   83.47   11.63   0
  24   4  -5    8.04   14.68   0
 -24  -4   5   23.54   12.37   0
 -22  -4   5    3.21   11.13   0
  22  -4  -5    2.81   11.03   0
 -22   4   5    6.38   21.30   0
 -22  -4   5    1.47   14.77   0
  22   4  -5   -4.36   10.85   0
 -22   4   5    8.61   18.95   0
  22   4  -5   -6.73   11.07   0
  20  -4  -5   97.28   10.85   0
 -20   4   5   86.24   21.97   0
  20   4  -5   76.03   10.24   0
 -20   4   5   79.03   19.68   0
 -20  -4   5   87.38   14.09   0
  20   4  -5   89.56   13.11   0
 -20  -4   5   76.49   10.38   0
  18   4  -5   75.39   10.37   0
 -18   4   5   63.06   22.54   0
 -18  -4   5   62.24   13.47   0
  18   4  -5   65.87    9.62   0
 -18   4   5   55.82   19.37   0
  18  -4  -5   54.04   11.99   0
 -18  -4   5   60.63   10.00   0
  16   4  -5   -4.55    9.91   0
  16   4  -5    0.80    8.87   0
 -16  -4   5    0.49   12.21   0
  16  -4  -5    3.99    9.24   0
 -16  -4   5    3.38    9.58   0
  14   4  -5   72.31    8.80   0
 -14  -4   5   75.71    9.13   0
 -14  -4   5   65.96    9.65   0
  14   4  -5   83.74   11.76   0
  14  -4  -5   69.90    9.07   0
  12   4  -5   71.54   10.57   0
 -12  -4   5   63.48   11.15   0
 -12  -4   5   68.10    8.71   0
  12  -4  -5   75.18   10.79   0
  12   4  -5   76.23    9.23   0
  10   4  -5    3.39    9.89   0
  10  -4  -5    3.72    8.14   0
 -10  -4   5   -1.24    8.93   0
  10   4  -5    7.08   10.94   0
 -10  -4   5   -1.53    8.32   0
   8   4  -5   51.12    8.14   0
  -8  -4   5   56.02    8.59   0
   8   4  -5   63.45   10.34   0
  -8  -4   5   48.90    8.06   0
   6   4  -5    4.82    8.24   0
  -6  -4   5    2.84    8.22   0
   6   4  -5    0.48   10.07   0
  -6  -4   5    4.83    8.30   0
   4   4  -5  300.01   13.80   0
   4   4  -5  311.89    9.87   0
   4  -4  -5  346.38   17.27   0
  -4   4   5  353.59   16.46   0
  -4  -4   5  283.92    9.64   0
  -4  -4   5  312.65   12.46   0
   2   4  -5    2.88   13.21   0
   2  -4  -5    1.83   12.06   0
  -2  -4   5    4.69    7.96   0
  -2   4   5    5.58   11.10   0
   2   4  -5   -2.30    8.21   0
   0  -4  -5   63.57   10.50   0
   0   4  -5   49.11    8.46   0
   0  -4   5   47.56    8.34   0
   0   4   5   55.65   10.17   0
  -2  -4  -5    9.08    9.84   0
  -2  -4  -5    7.34    8.08   0
   2   4   5    2.46    9.57   0
  -2   4  -5    4.76    9.72   0
  -4  -4  -5   40.39   10.02   0
  -4  -4  -5   34.93    8.49   0
  -4   4  -5   37.36    8.14   0
   4   4   5   41.78    8.11   0
  -6  -4  -5   32.31   10.43   0
  -6  -4  -5   30.09    8.69   0
   6  -4   5   27.52   14.50   0
  -6   4  -5   36.61   12.60   0
  -6   4  -5   31.21    8.25   0
   6   4   5   31.36    8.47   0
  -8  -4  -5  200.08    9.32   0
  -8  -4  -5  142.54    9.04   0
   8  -4   5  149.62   13.36   0
  -8   4  -5  170.89   12.71   0
   8   4   5  153.81   10.83   0
  -8   4  -5  196.83    9.02   0
  -8   4  -5  149.62    8.87   0
   8   4   5  172.72    9.16   0
 -10  -4  -5   33.02    8.87   0
 -10  -4  -5   24.26    8.78   0
  10  -4   5   34.31   11.62   0
  10   4   5   25.87    8.64   0
 -10   4  -5   28.82    8.48   0
  10   4   5   25.20    8.82   0
 -10   4  -5   32.02   10.42   0
 -12  -4  -5  132.83    9.69   0
 -12  -4  -5  108.03   11.41   0
 -12   4  -5  113.15   11.29   0
  12   4   5  105.04    9.33   0
 -12   4  -5  129.12    9.21   0
  12   4   5  128.87    9.40   0
  12  -4   5  104.73   11.89   0
 -14  -4  -5   -2.01    9.47   0
 -14  -4  -5   -1.14   11.08   0
  14  -4   5    2.40    9.42   0
  14   4   5    2.80    8.79   0
  14   4   5    1.13    9.17   0
 -14   4  -5    3.43    9.03   0
 -14   4  -5    4.71   10.81   0
 -16  -4  -5   40.61    9.82   0
 -16  -4  -5   52.36   10.16   0
  16  -4   5   37.94   12.14   0
  16   4   5   35.08    9.91   0
 -16   4  -5   42.15    9.78   0
  16   4   5   51.42   12.11   0
 -16   4  -5   46.92    9.69   0
 -18  -4  -5    9.62   10.32   0
 -18  -4  -5    6.91   10.31   0
  18  -4   5    2.73   12.60   0
  18   4   5    2.63   10.39   0
  18   4   5   -3.14   12.54   0
 -18   4  -5   15.52   12.15   0
 -18   4  -5    9.32   12.53   0
 -20  -4  -5   33.15   11.23   0
  20  -4   5   28.47   13.60   0
  20   4   5   27.95   10.89   0
  20   4   5   44.90   11.23   0
 -20  -4  -5   36.09   10.60   0
 -20   4  -5   35.16   10.79   0
 -20   4  -5   54.60   10.98   0
 -22   4  -5   17.72   14.27   0
  22  -4   5    9.35   14.79   0
 -22  -4  -5   -0.22   12.07   0
 -22  -4  -5   -5.01   14.48   0
  22   4   5    1.46   11.72   0
  22   4   5    8.44   11.88   0
 -22   4  -5    0.12   11.76   0
  23   5  -5   34.44   14.42   0
  23  -5  -5   33.54   11.41   0
 -23  -5   5   24.87   12.88   0
 -23   5   5   20.47   28.87   0
  23   5  -5   29.72   11.45   0
 -23   5   5   19.84   25.99   0
 -23  -5   5   29.75   12.02   0
  21   5  -5   70.27   10.89   0
 -21  -5   5   61.39   12.03   0
  21   5  -5   47.69   13.29   0
 -21   5   5   70.29   29.22   0
 -21   5   5   63.36   24.66   0
 -21  -5   5   74.49   11.30   0
  21  -5  -5   65.20   10.85   0
  19  -5  -5  222.06   10.78   0
  19   5  -5  240.89   11.76   0
 -19  -5   5  200.90   14.44   0
  19   5  -5  213.38   10.63   0
 -19  -5   5  214.55   13.09   0
  17  -5  -5  134.40   12.05   0
 -17  -5   5  127.96    9.99   0
  17   5  -5  147.15   13.08   0
  17   5  -5  103.85    9.85   0
 -17  -5   5  109.86   10.85   0
 -15  -5   5  172.59    9.81   0
  15   5  -5  177.72    9.87   0
  15   5  -5  201.54   12.73   0
 -15  -5   5  177.37   10.59   0
  15  -5  -5  176.20    9.97   0
 -13  -5   5   22.95    9.22   0
  13   5  -5   29.15    9.07   0
 -13  -5   5   25.87   11.51   0
  13   5  -5   39.24    9.44   0
  13  -5  -5   45.43   10.77   0
 -11  -5   5   55.19    8.75   0
  11   5  -5   61.49    8.66   0
 -11  -5   5   53.88    9.11   0
  11   5  -5   59.93    9.29   0
  11  -5  -5   60.06    8.71   0
   9   5  -5   90.52   10.53   0
  -9  -5   5   93.51   10.64   0
  -9  -5   5   88.98    9.24   0
   9   5  -5   89.46    9.20   0
  -7  -5   5   82.23   10.46   0
   7   5  -5   83.83   10.59   0
   7   5  -5   95.71    8.93   0
  -7  -5   5   84.39   10.58   0
  -5  -5   5  860.09   15.34   0
   5   5  -5  964.73   12.77   0
  -5  -5   5  892.98   12.43   0
   5  -5  -5 1019.31   24.09   0
   5   5  -5  856.72   15.57   0
  -5   5   5 1015.99   24.41   0
  -3  -5   5    6.81   11.43   0
   3   5  -5    2.33   11.71   0
   3   5  -5    3.46    8.44   0
   3  -5  -5    4.21   12.13   0
  -3  -5   5    4.02   10.13   0
  -3   5   5    1.88   11.53   0
   1  -5  -5 3083.21   26.07   0
  -1  -5   5 2649.99   16.96   0
   1   5  -5 2512.25   17.11   0
  -1   5   5 2865.77   23.23   0
  -1   5  -5   33.11    8.12   0
   1  -5   5   30.38    8.12   0
  -1  -5  -5   34.58   10.51   0
   1   5   5   31.57    8.47   0
   3   5   5  179.73    8.83   0
  -3  -5  -5  191.39   10.93   0
  -3  -5  -5  146.04    9.00   0
  -3   5  -5  150.37    9.09   0
  -5   5  -5   -1.69    8.13   0
  -5  -5  -5    5.79    8.41   0
  -5  -5  -5    2.58    8.44   0
   5   5   5   12.68    8.14   0
   5  -5   5    1.23   21.13   0
  -7   5  -5   10.56    8.05   0
  -7  -5  -5    8.97    8.65   0
   7  -5   5    0.92   13.53   0
  -7  -5  -5    0.51    8.24   0
   7   5   5   -2.25    8.44   0
  -9  -5  -5   36.55    8.80   0
   9  -5   5   35.99   12.93   0
  -9  -5  -5   28.00    8.76   0
   9   5   5   29.67    8.68   0
  -9   5  -5   42.49    8.60   0
  -9   5  -5   33.47    8.38   0
   9   5   5   37.25    8.85   0
 -11  -5  -5   13.24    9.30   0
 -11  -5  -5   16.12    8.85   0
  11   5   5   19.51    9.06   0
 -11   5  -5   11.50    8.53   0
 -11   5  -5   11.55    8.55   0
  11   5   5   14.26   11.20   0
 -11   5  -5   16.33   12.30   0
  11  -5   5   18.37   11.42   0
 -13  -5  -5   53.42    9.15   0
  13  -5   5   53.91   11.78   0
 -13  -5  -5   63.39    9.69   0
 -13   5  -5   57.48   11.10   0
  13   5   5   37.75    9.39   0
 -13   5  -5   68.15    8.99   0
  13   5   5   57.07    9.52   0
 -15  -5  -5   -2.53    9.54   0
  15  -5   5    9.70   12.00   0
 -15  -5  -5   -2.82    9.75   0
  15   5   5    0.78    9.46   0
  15   5   5    3.01    9.48   0
 -15   5  -5    1.54    9.47   0
 -15   5  -5    1.09    9.32   0
  17  -5   5  -11.22   12.74   0
 -17  -5  -5   -4.71   12.91   0
  17   5   5    6.43   10.14   0
 -17   5  -5    4.78   12.13   0
 -17  -5  -5   13.75   10.25   0
  17   5   5    8.88   12.59   0
 -17   5  -5    9.67    9.90   0
 -19  -5  -5    4.11   10.85   0
  19  -5   5    9.34   11.08   0
 -19   5  -5   11.99   12.81   0
 -19  -5  -5   27.89   11.08   0
  19   5   5   16.38   13.32   0
  19   5   5   15.45   10.79   0
 -19   5  -5   14.99   10.66   0
 -21   5  -5   21.46   11.56   0
 -21  -5  -5   11.81   11.32   0
  21  -5   5   12.30   14.41   0
 -21  -5  -5   16.43   12.22   0
  21   5   5   18.03   11.45   0
 -21   5  -5   15.55   14.05   0
  21   5   5    1.75   11.47   0
  22   6  -5  107.47   11.97   0
  22  -6  -5   85.89   11.53   0
  22   6  -5   85.87   11.26   0
 -22  -6   5   94.36   11.61   0
 -22  -6   5   87.54   15.56   0
  20  -6  -5   68.01   13.08   0
  20   6  -5   72.44   13.84   0
 -20  -6   5   63.66   11.84   0
  20   6  -5   58.67   10.56   0
 -20  -6   5   69.62   10.96   0
  18  -6  -5  456.70   11.36   0
  18   6  -5  517.58   15.04   0
  18   6  -5  429.84   10.97   0
 -18  -6   5  481.95   15.21   0
 -18  -6   5  456.16   11.53   0
 -16  -6   5  330.65   12.58   0
  16   6  -5  296.11   10.29   0
  16   6  -5  367.45   11.53   0
 -16  -6   5  305.24   11.58   0
  16  -6  -5  348.61   12.39   0
 -14  -6   5  622.37   14.14   0
 -14  -6   5  588.19   13.36   0
  14   6  -5  585.68   11.24   0
  14   6  -5  705.83   12.48   0
  14  -6  -5  654.69   11.42   0
  12   6  -5  208.06    9.87   0
  12   6  -5  228.21   10.68   0
 -12  -6   5  217.49   12.46   0
 -12  -6   5  200.73    9.92   0
  12  -6  -5  219.78    9.60   0
 -10  -6   5  111.01   10.84   0
  10   6  -5  114.42   10.79   0
 -10  -6   5  117.51    9.40   0
  10   6  -5  133.78    9.20   0
  10  -6  -5  119.96    9.13   0
  -8  -6   5  120.61   10.78   0
   8   6  -5  123.11   10.81   0
   8   6  -5  144.82    9.29   0
  -8  -6   5  123.03    9.08   0
   6   6  -5  111.90   10.97   0
  -6  -6   5  113.12    8.93   0
   6   6  -5  112.06   11.05   0
  -6   6   5  130.14   17.09   0
   6  -6  -5  118.79   16.84   0
  -6  -6   5  117.27   11.04   0
   4  -6  -5 1717.21   24.07   0
   4   6  -5 1609.63   14.37   0
  -4  -6   5 1575.70   20.45   0
   4   6  -5 1511.58   19.37   0
  -4  -6   5 1500.78   14.02   0
  -4   6   5 1726.74   23.09   0
  -2  -6   5 4075.80   21.17   0
  -2  -6   5 4465.58   36.93   0
  -2   6   5 4886.75   29.69   0
   2   6  -5 4276.15   20.75   0
   2  -6  -5 4823.18   31.08   0
   0   6   5 2193.93   19.54   0
   0  -6  -5 2403.71   20.87   0
   0   6  -5 1978.57   15.14   0
   0  -6   5 1915.72   14.94   0
  -2   6  -5 5045.52   21.79   0
  -2  -6  -5 6035.72   27.25   0
  -2  -6  -5 4834.54   21.64   0
   2  -6   5 5225.89   21.95   0
   2   6   5 5522.96   26.87   0
  -4  -6  -5  470.71   12.44   0
  -4  -6  -5  363.07    9.92   0
  -4   6  -5  391.30    9.85   0
   4   6   5  432.94   10.47   0
   6  -6   5  112.98   18.76   0
  -6  -6  -5  140.48    9.26   0
  -6  -6  -5  107.15   10.85   0
   6   6   5  129.89   11.01   0
  -6   6  -5  102.94    8.66   0
   8  -6   5  643.27   18.62   0
  -8  -6  -5  771.54   11.44   0
  -8   6  -5  582.07   10.37   0
  -8  -6  -5  611.66   10.90   0
   8   6   5  734.43   11.45   0
 -10   6  -5   66.33   10.68   0
  10  -6   5   62.87   13.72   0
 -10  -6  -5   62.41   11.29   0
 -10  -6  -5   89.68    9.62   0
 -10   6  -5   80.95    9.06   0
  10   6   5   75.00    9.56   0
  12  -6   5 1040.69   18.22   0
 -12  -6  -5 1002.58   12.68   0
 -12  -6  -5 1269.81   13.40   0
 -12   6  -5 1002.12   11.73   0
  12   6   5 1014.84   12.63   0
 -12   6  -5 1266.19   12.71   0
  12   6   5 1201.29   13.18   0
 -14   6  -5  108.78   11.45   0
 -14  -6  -5  115.13   10.39   0
  14  -6   5  129.05   12.54   0
 -14  -6  -5  149.13   10.20   0
  14   6   5  125.44   12.33   0
 -14   6  -5  135.63   11.73   0
  14   6   5  131.77   12.30   0
 -16  -6  -5  293.17   11.14   0
  16  -6   5  312.02   14.05   0
 -16  -6  -5  394.15   11.55   0
  16   6   5  296.95   11.22   0
 -16   6  -5  405.59   10.81   0
  16   6   5  393.07   11.39   0
 -16   6  -5  311.76   12.69   0
 -18  -6  -5  217.54   11.30   0
  18  -6   5  219.85   13.83   0
 -18  -6  -5  265.48   11.66   0
  18   6   5  201.23   13.58   0
 -18   6  -5  221.28   10.80   0
  18   6   5  246.45   11.34   0
 -18   6  -5  274.61   11.34   0
 -20  -6  -5   75.02   11.58   0
  20  -6   5   70.54   11.99   0
 -20  -6  -5  104.17   14.39   0
  20   6   5   59.29   11.38   0
  20   6   5   78.69   13.91   0
 -20   6  -5   87.26   11.33   0
 -20   6  -5   49.75   11.37   0
  21   7  -5   18.70   11.49   0
  21  -7  -5   25.65   11.07   0
 -21  -7   5   13.85   12.15   0
  21   7  -5    4.82   10.94   0
 -21  -7   5    0.17   11.29   0
 -19  -7   5  370.63   11.94   0
  19  -7  -5  331.63   11.20   0
  19   7  -5  398.16   14.84   0
  19   7  -5  332.72   13.44   0
 -19  -7   5  341.08   12.65   0
  17  -7  -5   69.47   10.12   0
 -17  -7   5   64.35   10.36   0
  17   7  -5   61.56   13.22   0
  17   7  -5   65.26   10.18   0
 -17  -7   5   71.66   10.93   0
 -15  -7   5  236.99   10.52   0
  15   7  -5  244.46   10.21   0
  15   7  -5  280.04   11.18   0
 -15  -7   5  251.42   13.23   0
  15  -7  -5  254.63   10.30   0
  13   7  -5    5.54    9.17   0
  13   7  -5    2.05   12.15   0
 -13  -7   5   -0.51    9.57   0
 -13  -7   5    4.69    9.16   0
  13  -7  -5    1.88    9.17   0
 -11  -7   5  199.03    9.97   0
  11   7  -5  204.49   11.58   0
 -11  -7   5  197.04    9.76   0
  11   7  -5  225.14   12.62   0
  11  -7  -5  229.18   11.56   0
  -9  -7   5  163.07   11.46   0
   9   7  -5  145.08    9.39   0
   9   7  -5  165.75    9.61   0
  -9  -7   5  150.32    9.42   0
  -7  -7   5  707.14   11.52   0
  -7   7   5  813.46   23.55   0
  -7  -7   5  715.83   14.15   0
   7   7  -5  691.27   14.04   0
   7   7  -5  768.43   11.83   0
   7  -7  -5  736.18   22.40   0
  -5   7   5   28.52   12.51   0
  -5  -7   5   27.60   10.72   0
   5   7  -5   32.83    8.77   0
  -5  -7   5   27.87    8.65   0
   5   7  -5   25.83   10.57   0
   5  -7  -5   26.25   12.01   0
   3  -7  -5 1478.66   19.04   0
  -3   7   5 1475.73   18.99   0
  -3  -7   5 1351.44   21.06   0
   3   7  -5 1391.82   13.54   0
   3   7  -5 1284.63   20.03   0
  -3  -7   5 1316.43   13.21   0
  -1  -7   5   11.38   15.66   0
  -1  -7   5   12.14    8.35   0
  -1   7   5    7.56    8.82   0
   1   7  -5   17.85    8.42   0
   1  -7  -5    6.79   10.73   0
   1   7   5 1262.70   16.00   0
   1  -7   5 1093.84   13.85   0
  -1  -7  -5 1320.38   15.17   0
  -1   7  -5 1132.65   12.42   0
   3   7   5    0.31    8.80   0
  -3   7  -5    4.28    9.94   0
  -3  -7  -5    0.61    8.88   0
  -3  -7  -5    1.72    8.50   0
   5   7   5  823.91   11.99   0
   5  -7   5  784.56   35.81   0
  -5   7  -5  728.63   11.10   0
  -5  -7  -5  714.46   11.34   0
  -5  -7  -5  882.86   12.29   0
   7  -7   5   11.90   15.35   0
  -7  -7  -5   14.79    8.82   0
  -7  -7  -5   14.05    8.90   0
  -7   7  -5    9.46    8.53   0
   7   7   5    8.63    8.88   0
  -9   7  -5  351.71    9.85   0
   9  -7   5  353.09   15.55   0
  -9  -7  -5  347.38   10.42   0
  -9  -7  -5  437.38   10.58   0
   9   7   5  395.90   10.70   0
  11  -7   5   51.95   13.79   0
 -11  -7  -5   44.53   11.75   0
 -11   7  -5   48.78    9.00   0
 -11  -7  -5   66.45   11.72   0
 -11   7  -5   62.43    8.75   0
  11   7   5   60.24   11.47   0
  13  -7   5  318.21   15.52   0
 -13  -7  -5  315.84   12.66   0
 -13  -7  -5  392.06   11.04   0
  13   7   5  302.56   12.70   0
 -13   7  -5  326.82   10.23   0
 -13   7  -5  385.21   10.53   0
  13   7   5  352.68   10.72   0
 -15  -7  -5  100.07   10.47   0
  15  -7   5  104.21   15.02   0
 -15  -7  -5  129.19   10.77   0
  15   7   5  108.98   10.41   0
 -15   7  -5  106.15    9.70   0
 -15   7  -5  122.07   12.29   0
  15   7   5  123.34   10.41   0
 -17   7  -5  429.30   11.42   0
 -17  -7  -5  480.87   12.16   0
  17  -7   5  492.33   17.02   0
 -17  -7  -5  591.52   12.50   0
  17   7   5  489.75   12.07   0
 -17   7  -5  595.24   12.09   0
  17   7   5  521.78   12.14   0
 -19  -7  -5   32.40   11.43   0
 -19   7  -5   33.29   10.76   0
  19  -7   5   32.68   14.59   0
 -19  -7  -5   36.37   11.73   0
  19   7   5   36.89   11.35   0
  19   7   5   49.30   11.53   0
 -19   7  -5   49.14   11.01   0
 -20  -8   5   30.90   13.85   0
  20  -8  -5   11.52   11.13   0
 -20  -8   5   27.41   12.18   0
  20   8  -5   17.90   10.87   0
  20   8  -5    9.59   14.31   0
  18  -8  -5   23.97   10.47   0
 -18  -8   5   11.53   10.74   0
  18   8  -5    8.81   11.10   0
  18   8  -5   17.21   10.65   0
 -18  -8   5   15.72   11.36   0
 -16  -8   5   54.29    9.94   0
  16   8  -5   47.28   10.99   0
  16   8  -5   41.76    9.66   0
 -16  -8   5   59.82   11.11   0
  16  -8  -5   55.72   10.02   0
 -14  -8   5   91.66   12.32   0
  14   8  -5   95.71    9.79   0
  14   8  -5  121.99   10.42   0
 -14  -8   5  106.96   10.49   0
  14  -8  -5  122.28    9.65   0
 -12  -8   5  209.59   12.28   0
  12   8  -5  189.63   12.14   0
  12  -8  -5  220.48   10.11   0
  12   8  -5  235.28   10.60   0
 -12  -8   5  208.45   10.44   0
  10   8  -5  451.51   12.74   0
  10   8  -5  511.70   11.17   0
 -10  -8   5  474.10   10.97   0
 -10  -8   5  427.94   11.12   0
  -8   8   5  254.46   18.38   0
   8   8  -5  216.85   12.06   0
  -8  -8   5  208.16   12.13   0
   8   8  -5  230.43   11.97   0
  -8  -8   5  236.54   10.04   0
  -6  -8   5  465.07   13.56   0
  -6  -8   5  475.94   10.56   0
  -6   8   5  541.80   18.54   0
   6  -8  -5  486.62   17.43   0
   6   8  -5  448.72   13.17   0
   6   8  -5  490.97   12.64   0
  -4  -8   5   82.19   13.07   0
   4   8  -5   98.18    9.37   0
  -4   8   5   93.91   13.64   0
  -4  -8   5   85.78    9.12   0
   4  -8  -5   87.88   11.58   0
   2  -8  -5   35.51   12.50   0
  -2  -8   5   34.69   14.01   0
   2   8  -5   37.80    8.78   0
  -2  -8   5   28.20    8.73   0
  -2   8   5   42.77   11.63   0
   0   8   5   88.05   11.43   0
   0  -8   5   76.75   16.99   0
   0  -8   5   79.58    9.08   0
   0   8  -5   77.67   10.49   0
   0  -8  -5   84.72   11.09   0
   2  -8   5    4.61   23.22   0
   2   8   5   -0.13    8.91   0
   2  -8   5    3.95   23.31   0
  -2  -8  -5    1.78    8.58   0
   2  -8   5    2.34    8.54   0
  -2  -8  -5    8.83   10.93   0
  -2   8  -5    2.38    8.64   0
  -4   8  -5  120.40    9.02   0
   4  -8   5  128.99   25.56   0
   4   8   5  136.42    9.72   0
  -4  -8  -5  133.47   11.05   0
  -4  -8  -5  147.43    9.66   0
   6   8   5   46.62    9.22   0
   6  -8   5   35.59   16.54   0
  -6   8  -5   25.87    8.89   0
  -6  -8  -5   31.74    8.94   0
  -6  -8  -5   39.58    9.20   0
   8   8   5   86.76   11.48   0
   8  -8   5   80.96   14.83   0
  -8  -8  -5   79.93    9.22   0
  -8   8  -5   69.51    8.81   0
  -8  -8  -5   89.03   11.50   0
  10  -8   5   61.36   13.72   0
 -10  -8  -5   61.98    9.57   0
 -10  -8  -5   80.70    9.58   0
 -10   8  -5   53.95   10.91   0
  10   8   5   72.47    9.71   0
  12   8   5   65.61    9.71   0
  12  -8   5   51.84   14.44   0
 -12  -8  -5   63.47    9.88   0
 -12   8  -5   41.39    9.22   0
 -12  -8  -5   64.73    9.68   0
 -12   8  -5   60.56   11.61   0
 -14   8  -5   -2.33    9.53   0
  14  -8   5    6.07   14.49   0
 -14  -8  -5    4.63   10.44   0
 -14  -8  -5   12.49   10.24   0
  14   8   5   -4.56   10.25   0
 -14   8  -5    5.22    9.67   0
  14   8   5    0.87    9.99   0
 -16  -8  -5   58.57   10.88   0
  16  -8   5   51.94   13.81   0
 -16   8  -5   61.26   10.21   0
 -16  -8  -5   66.41   11.01   0
  16   8   5   78.69   10.94   0
 -16   8  -5   86.77   10.48   0
  16   8   5   55.30   10.75   0
  18  -8   5   28.18   14.46   0
 -18  -8  -5    9.07   11.22   0
 -18   8  -5    5.14   10.97   0
 -18  -8  -5   25.94   11.63   0
  18   8   5   42.02   11.49   0
 -18   8  -5   24.72   10.95   0
  18   8   5   34.30   11.26   0
 -19  -9   5   59.35   14.04   0
  19   9  -5   79.24   12.10   0
  19   9  -5   50.76   10.94   0
 -19  -9   5   63.94   11.95   0
  19  -9  -5   57.03   11.33   0
  17   9  -5   30.65   11.33   0
 -17  -9   5   29.19   10.86   0
  17   9  -5   20.44   12.93   0
 -17  -9   5   31.18   11.53   0
  17  -9  -5   29.09   10.45   0
 -15  -9   5   28.47   10.35   0
  15  -9  -5   32.62   12.15   0
  15   9  -5   24.69   12.95   0
  15   9  -5   32.80   12.22   0
 -15  -9   5   23.49   10.75   0
 -13  -9   5   81.91   12.37   0
  13   9  -5   69.82    9.74   0
  13   9  -5   82.81   10.39   0
 -13  -9   5   64.89   10.33   0
  13  -9  -5   59.25   10.07   0
 -11  -9   5    5.20    9.60   0
  11   9  -5    7.21    9.43   0
  11   9  -5    2.87    9.57   0
 -11  -9   5   15.13   11.72   0
  -9  -9   5   15.90   11.65   0
  -9   9   5   18.01   17.45   0
   9   9  -5   11.92    9.38   0
   9   9  -5   20.63   11.63   0
  -9  -9   5   20.78    9.41   0
  -7  -9   5  110.75    9.67   0
  -7  -9   5   92.46   11.97   0
   7  -9  -5  104.22   14.85   0
  -7   9   5  121.03   16.27   0
   7   9  -5   99.14   11.52   0
   7   9  -5  119.15    9.64   0
   5   9  -5    5.48    9.22   0
  -5  -9   5    4.52   11.48   0
  -5   9   5   17.40   11.95   0
  -5  -9   5    8.95   11.21   0
   5  -9  -5   13.18   12.80   0
   3   9  -5  289.31   10.10   0
  -3  -9   5  263.65   14.58   0
  -3   9   5  311.89   13.61   0
   3  -9  -5  295.42   12.83   0
  -3  -9   5  273.77    9.95   0
  -1  -9   5   20.41    8.92   0
  -1   9   5   23.74    9.55   0
  -1  -9   5   24.16   14.11   0
   1   9  -5   21.28    9.06   0
   1  -9  -5   15.03   11.20   0
   1   9   5  329.55   10.97   0
   1  -9   5  285.41   18.28   0
  -1   9  -5  308.56   10.01   0
  -1  -9  -5  290.80    9.83   0
   1  -9   5  323.91   10.00   0
  -1  -9  -5  342.82   10.58   0
   3   9   5    3.26   11.39   0
   3  -9   5    3.46   19.07   0
   3  -9   5    1.96    8.95   0
  -3  -9  -5    4.72   10.92   0
  -3   9  -5    6.50    9.12   0
  -3  -9  -5    2.74   11.29   0
   3  -9   5    0.97   18.36   0
  -5   9  -5  214.69    9.35   0
   5   9   5  228.49   10.13   0
   5  -9   5  208.39   19.60   0
  -5  -9  -5  195.01   11.41   0
   5  -9   5  191.27   20.06   0
  -5  -9  -5  230.94   10.27   0
   7   9   5    0.13    9.34   0
   7  -9   5    3.58   15.69   0
  -7  -9  -5   -2.05    9.19   0
  -7  -9  -5    7.08    9.16   0
  -7   9  -5    8.67    8.73   0
   9   9   5   71.33    9.73   0
   9  -9   5   55.05   13.77   0
  -9   9  -5   52.48    9.26   0
  -9  -9  -5   65.62    9.69   0
  -9  -9  -5   72.99   11.73   0
  11  -9   5   31.62   14.41   0
 -11  -9  -5   35.34    9.89   0
 -11   9  -5   22.28    9.39   0
 -11  -9  -5   28.98   12.00   0
  11   9   5   38.99    9.87   0
  13  -9   5   27.12   14.74   0
 -13  -9  -5   20.71   10.32   0
 -13  -9  -5   35.62   10.36   0
 -13   9  -5   32.19    9.77   0
 -13   9  -5   11.81   11.83   0
  13   9   5   20.76   10.26   0
  15  -9   5   29.16   15.55   0
 -15  -9  -5   41.52   10.90   0
 -15  -9  -5   49.94   11.02   0
 -15   9  -5   33.25   10.37   0
 -15   9  -5   37.58   10.29   0
  15   9   5   28.97   10.68   0
 -17  -9  -5   17.88   11.52   0
  17  -9   5   21.77   16.51   0
 -17  -9  -5   37.45   11.50   0
  17   9   5   22.46   11.49   0
 -17   9  -5   31.50   13.40   0
  17   9   5   40.31   11.28   0
 -17   9  -5   21.28   13.31   0
 -19  -9  -5   -2.22   12.20   0
  19   9   5   22.45   14.81   0
  18  10  -5   22.55   12.04   0
  18  10  -5   16.87   11.35   0
 -18 -10   5   24.83   12.24   0
 -18 -10   5   16.62   11.68   0
  18 -10  -5   18.63   11.04   0
 -16 -10   5   36.58   13.47   0
  16  10  -5   30.67   11.26   0
  16  10  -5   30.56   10.88   0
 -16 -10   5   38.90   14.10   0
  16 -10  -5   28.21   10.96   0
  14 -10  -5  260.41   12.78   0
 -14 -10   5  243.93   11.46   0
  14  10  -5  263.59   13.66   0
  14  10  -5  238.82   13.20   0
 -14 -10   5  244.15   11.42   0
 -12  10   5  118.14   25.79   0
 -12 -10   5  114.77   12.54   0
 -12  10   5  109.73   28.19   0
  12  10  -5  101.47   10.28   0
  12  10  -5  110.36   10.55   0
 -12 -10   5   88.85   12.85   0
  12 -10  -5   97.07   10.03   0
 -10 -10   5  612.38   14.28   0
 -10  10   5  748.55   25.29   0
  10  10  -5  623.05   14.21   0
  10  10  -5  710.76   12.47   0
 -10 -10   5  615.48   13.96   0
  -8 -10   5   71.25   12.04   0
  -8  10   5   82.82   17.06   0
   8  10  -5   70.10   11.79   0
   8  10  -5   71.89   12.38   0
  -8 -10   5   56.65    9.97   0
   8 -10  -5   69.85   15.52   0
  -6 -10   5  143.30   10.21   0
  -6  10   5  160.56   15.47   0
   6 -10  -5  143.94   12.34   0
   6  10  -5  151.31   10.10   0
  -6 -10   5  141.18   12.13   0
   4  10  -5  119.76    9.77   0
  -4 -10   5  103.31   12.28   0
  -4  10   5  125.51   14.84   0
  -4 -10   5  101.96    9.62   0
   4 -10  -5  112.87   12.14   0
   2  10  -5   -4.70    9.25   0
  -2  10   5    8.13    9.64   0
  -2 -10   5    3.24   13.28   0
   2 -10  -5   -0.35   11.38   0
  -2 -10   5    4.78    9.12   0
   0 -10  -5  132.61   11.84   0
   0  10   5  125.40   10.26   0
   0 -10   5  105.45   15.62   0
   0  10  -5  119.27    9.33   0
   0 -10   5  107.89    9.44   0
   2  10   5    1.30   11.54   0
   2 -10   5    5.14   16.20   0
   2 -10   5    9.69   11.18   0
  -2  10  -5   -0.60    9.13   0
  -2 -10  -5    8.93    8.97   0
  -2 -10  -5    7.52    9.18   0
   4  10   5   28.34    9.56   0
   4 -10   5   31.39    8.98   0
  -4 -10  -5   20.79    9.21   0
  -4  10  -5   28.04    9.13   0
   4 -10   5   25.28   17.17   0
  -4 -10  -5   28.77   11.93   0
   4 -10   5   22.74   16.43   0
   6 -10   5   73.41   16.71   0
   6  10   5   73.63    9.63   0
  -6 -10  -5   66.47    9.65   0
   6 -10   5   65.58   16.68   0
  -6 -10  -5   86.89    9.42   0
  -6  10  -5   67.95    9.53   0
   8 -10   5   44.95   15.66   0
   8  10   5   47.11    9.92   0
  -8 -10  -5   36.87   11.64   0
  -8 -10  -5   42.64   10.03   0
  -8  10  -5   38.86    9.39   0
  10 -10   5  283.12   17.77   0
 -10  10  -5  251.92   12.26   0
  10  10   5  295.00   11.15   0
 -10 -10  -5  258.09   11.02   0
 -10 -10  -5  332.26   11.29   0
  12 -10   5  112.92   15.62   0
 -12  10  -5  110.79    9.99   0
 -12 -10  -5  113.95   10.73   0
 -12  10  -5  167.81   12.48   0
 -12 -10  -5  153.56   10.56   0
  12  10   5  130.35   10.63   0
  14 -10   5  168.98   14.57   0
 -14 -10  -5  170.69   11.57   0
 -14  10  -5  162.28   10.93   0
  14  10   5  207.69   13.56   0
 -14 -10  -5  208.24   11.47   0
 -14  10  -5  229.78   13.34   0
  16 -10   5   65.87   17.11   0
 -16 -10  -5   70.54   11.68   0
 -16  10  -5   52.34   13.34   0
 -16 -10  -5   59.41   11.68   0
 -16  10  -5   90.27   11.32   0
  16  10   5   73.03   11.51   0
 -17 -11   5   60.18   14.36   0
  17  11  -5   82.15   12.27   0
  17  11  -5   67.22   11.84   0
 -17 -11   5   62.76   15.16   0
  17 -11  -5   67.03   11.79   0
 -15 -11   5   84.19   11.45   0
  15  11  -5   90.26   11.62   0
  15  11  -5   74.72   13.77   0
 -15 -11   5   65.94   11.76   0
  15 -11  -5   84.39   13.10   0
 -13  11   5   12.84   27.91   0
 -13 -11   5    8.38   10.85   0
  13  11  -5   25.92   10.78   0
  13  11  -5   19.30   10.69   0
 -13 -11   5   -0.83   10.80   0
  13 -11  -5   14.33   10.38   0
 -13  11   5   15.98   25.38   0
 -11  11   5  514.19   23.46   0
  11  11  -5  450.57   14.12   0
  11  11  -5  476.58   12.09   0
 -11 -11   5  435.77   14.30   0
 -11 -11   5  430.22   12.02   0
  -9 -11   5    0.63   12.27   0
  -9  11   5    3.69   18.03   0
   9  11  -5    3.37   12.18   0
   9  11  -5    2.18   10.08   0
  -9 -11   5    4.89   10.31   0
   7 -11  -5  764.83   18.02   0
  -7 -11   5  759.39   12.14   0
  -7 -11   5  745.38   15.12   0
  -7  11   5  863.90   19.92   0
   7  11  -5  874.16   12.56   0
   5 -11  -5    3.33   11.61   0
  -5 -11   5    0.03   12.05   0
  -5  11   5    6.54   12.69   0
  -5 -11   5   10.90    9.82   0
   5  11  -5   11.15    9.79   0
  -3 -11   5  294.16   15.47   0
  -3 -11   5  322.27   10.78   0
   3 -11  -5  321.84   13.22   0
   3  11  -5  341.66   10.98   0
  -3  11   5  371.56   14.16   0
  -1 -11   5  157.83   10.54   0
   1  11  -5  171.63   10.18   0
  -1  11   5  202.04   13.06   0
  -1 -11   5  158.86   15.04   0
   1 -11  -5  188.02   12.55   0
  -1 -11  -5  242.28   13.01   0
   1  11   5  245.08   11.08   0
  -1  11  -5  245.58   10.20   0
  -1 -11  -5  210.27   10.41   0
   1 -11   5  228.14   10.35   0
   1 -11   5  217.11   16.53   0
   3 -11   5  535.26   19.01   0
   3  11   5  544.85   13.83   0
   3 -11   5  481.70   20.29   0
  -3  11  -5  525.84   11.13   0
  -3 -11  -5  481.67   11.01   0
   3 -11   5  506.95   11.14   0
  -3 -11  -5  582.73   12.16   0
   5 -11   5  601.56   20.90   0
   5  11   5  620.10   12.12   0
   5 -11   5  537.25   20.96   0
  -5 -11  -5  540.39   11.23   0
  -5  11  -5  571.04   11.31   0
  -5 -11  -5  680.41   12.57   0
   7  11   5   14.74   10.18   0
   7 -11   5   19.09   17.12   0
  -7 -11  -5   31.19    9.95   0
   7 -11   5   15.50   16.06   0
  -7  11  -5   18.55    9.51   0
  -7 -11  -5   24.29   10.32   0
   9 -11   5  576.76   19.61   0
  -9 -11  -5  518.02   11.56   0
   9  11   5  619.56   12.08   0
  -9 -11  -5  663.51   12.62   0
  -9  11  -5  544.35   11.47   0
  11  11   5  112.04   11.00   0
 -11  11  -5  104.40   12.69   0
  11 -11   5   89.26   15.87   0
 -11 -11  -5   90.89   10.89   0
 -11 -11  -5  112.26   10.96   0
 -13  11  -5  284.90   11.56   0
  13 -11   5  304.58   17.64   0
 -13 -11  -5  290.09   11.77   0
  13  11   5  361.89   12.34   0
 -13  11  -5  372.54   11.80   0
 -13 -11  -5  336.32   12.05   0
  15 -11   5   11.05   16.45   0
 -15  11  -5   10.87   13.36   0
 -15 -11  -5   20.83   11.65   0
  15  11   5    9.77   13.96   0
 -15  11  -5    5.10   11.17   0
 -15 -11  -5   17.77   11.43   0
 -16 -12   5   -1.95   14.39   0
  16 -12  -5    5.27   14.09   0
  16  12  -5    9.34   12.33   0
  16  12  -5    3.82   11.80   0
 -16 -12   5    1.79   12.46   0
 -14  12   5  110.09   32.01   0
 -14 -12   5   82.58   14.11   0
  14  12  -5  104.58   11.98   0
  14  12  -5   81.18   14.27   0
 -14 -12   5  100.58   14.67   0
  14 -12  -5  115.29   11.27   0
 -12 -12   5    9.27   13.47   0
 -12  12   5    9.14   20.95   0
  12  12  -5   10.97   11.11   0
  12  12  -5    3.06   13.45   0
 -12  12   5    2.50   18.59   0
 -12 -12   5    0.05   11.16   0
 -10 -12   5   16.39   13.13   0
 -10  12   5   19.95   16.92   0
  10  12  -5   20.41   10.71   0
 -10 -12   5   24.49   10.68   0
  -8 -12   5   -1.47   10.31   0
  -8 -12   5    4.16   12.70   0
  -8  12   5    8.81   16.18   0
   8 -12  -5    2.09   14.53   0
   8  12  -5    1.28   10.41   0
  -6 -12   5   14.79   12.60   0
  -6  12   5   13.54   13.42   0
  -6 -12   5   26.11   10.21   0
   6 -12  -5   14.28   12.09   0
   6  12  -5   10.09   10.25   0
  -4 -12   5   81.81   14.95   0
  -4  12   5  103.00   15.73   0
  -4 -12   5   84.81   10.52   0
   4  12  -5   87.48   10.48   0
   4 -12  -5   79.24   12.36   0
   2  12  -5  125.16   10.44   0
  -2 -12   5  117.68   13.05   0
  -2  12   5  153.17   13.57   0
   2 -12  -5  117.78   10.84   0
  -2 -12   5  120.31   10.38   0
   0  12  -5  304.17   11.16   0
   0 -12   5  289.99   16.54   0
   0 -12  -5  321.14   13.35   0
   0 -12   5  300.23   11.00   0
   0  12   5  333.62   11.77   0
   0 -12  -5  286.93   12.57   0
   2 -12   5  152.04   10.16   0
   2  12   5  169.32   13.19   0
  -2 -12  -5  165.34   10.71   0
  -2  12  -5  158.50   12.48   0
   2 -12   5  155.94   17.35   0
  -2 -12  -5  130.49   10.47   0
   4  12   5  256.98   13.56   0
   4 -12   5  208.72   10.44   0
  -4 -12  -5  270.11   13.60   0
   4 -12   5  207.25   17.23   0
  -4  12  -5  236.16   12.61   0
  -4 -12  -5  212.33   10.77   0
   4 -12   5  237.98   19.08   0
   6 -12   5   25.26   16.23   0
   6  12   5   24.34   10.43   0
  -6 -12  -5   11.27   10.08   0
   6 -12   5   22.12   16.29   0
  -6  12  -5   26.31   10.18   0
  -6 -12  -5   18.72   10.72   0
   8  12   5   89.70   13.10   0
   8 -12   5   80.23   17.25   0
  -8 -12  -5   84.67   10.63   0
   8 -12   5   70.32   19.24   0
  -8 -12  -5   95.90   11.10   0
  -8  12  -5   71.13   10.33   0
  10  12   5    2.72   10.79   0
 -10 -12  -5    3.78   10.64   0
  10 -12   5    8.36   15.32   0
 -10  12  -5    9.80   10.22   0
 -10 -12  -5    8.36   10.92   0
  12  12   5   87.50   11.58   0
  12 -12   5   83.37   16.60   0
 -12 -12  -5   88.77   11.53   0
 -12 -12  -5   88.97   11.61   0
 -12  12  -5   75.62   13.41   0
  14 -12   5   60.26   17.42   0
 -14 -12  -5   58.81   12.09   0
 -14  12  -5   58.42   11.84   0
 -14 -12  -5   68.77   12.08   0
  14  12   5   59.79   11.68   0
 -14  12  -5   48.45   14.07   0
 -13 -13   5   29.79   14.52   0
 -13  13   5   35.71   24.41   0
  13  13  -5   38.53   11.89   0
  13  13  -5   25.37   14.39   0
 -13  13   5   38.88   20.11   0
 -13 -13   5   34.86   12.01   0
  13 -13  -5   31.09   11.21   0
 -11 -13   5   20.68   13.99   0
 -11  13   5   34.05   19.73   0
  11  13  -5   39.06   11.51   0
 -11 -13   5   27.74   11.38   0
  -9 -13   5   29.75   11.00   0
  -9 -13   5   19.99   13.40   0
  -9  13   5   26.90   17.31   0
   9  13  -5   27.91   11.06   0
  -7 -13   5   44.81   13.51   0
  -7 -13   5   53.85   11.19   0
  -7  13   5   54.92   14.77   0
   7 -13  -5   56.77   15.18   0
   7  13  -5   54.35   11.21   0
  -5 -13   5   64.59   13.52   0
  -5  13   5   81.87   16.10   0
   5 -13  -5   61.38   12.90   0
  -5 -13   5   64.10   10.95   0
   5  13  -5   74.05   10.81   0
  -3 -13   5    1.06   14.97   0
  -3  13   5   -0.81   13.57   0
  -3 -13   5   -6.74   10.43   0
   3 -13  -5    5.60   12.99   0
   3  13  -5   11.20   10.48   0
   1  13  -5   -2.00   12.64   0
  -1 -13   5   -0.79   10.22   0
  -1  13   5   10.93   13.39   0
  -1 -13   5    0.33   15.10   0
   1 -13  -5    8.98   12.69   0
   1 -13  -5   -9.88    9.98   0
  -1  13  -5   -4.73   12.42   0
   1  13   5    9.32   12.94   0
   1 -13   5    4.53   15.10   0
  -1 -13  -5   11.68   12.48   0
  -1 -13  -5   18.73   10.02   0
   1 -13   5    6.90   10.29   0
   3  13   5    9.59   10.63   0
  -3 -13  -5    5.85   12.96   0
  -3  13  -5    7.85   10.05   0
   3 -13   5    8.93   10.08   0
   3 -13   5    4.04   18.91   0
  -3 -13  -5    9.03   12.25   0
  -5 -13  -5   67.07   13.65   0
   5 -13   5   50.35   17.46   0
   5  13   5   56.41   11.31   0
  -5  13  -5   72.56   10.58   0
  -5 -13  -5   65.26   10.67   0
   5 -13   5   55.47   18.63   0
  -7 -13  -5   18.40   11.08   0
   7 -13   5   15.17   17.06   0
   7  13   5   13.12   10.93   0
  -7 -13  -5   17.28   10.65   0
  -7  13  -5    8.31   10.58   0
   7 -13   5   10.76   17.27   0
   9  13   5   30.10   11.41   0
   9 -13   5   14.75   18.00   0
  -9 -13  -5    6.11   10.93   0
   9 -13   5   12.67   17.73   0
  -9  13  -5   11.25   10.76   0
  -9 -13  -5   21.36   11.36   0
  11  13   5    1.88   11.52   0
  11 -13   5    6.92   18.74   0
 -11 -13  -5   15.46   11.57   0
 -11 -13  -5    2.38   13.99   0
 -11  13  -5  -11.57   13.41   0
  13  13   5   18.10   11.95   0
  13 -13   5   10.51   17.63   0
 -13 -13  -5    4.56   12.08   0
 -13  13  -5   -5.38   14.48   0
 -13 -13  -5   19.93   12.16   0
 -12 -14   5   18.62   15.13   0
 -12 -14   5   31.86   12.23   0
 -12  14   5   47.47   21.64   0
  12  14  -5   31.16   12.25   0
 -10 -14   5  172.28   12.23   0
 -10 -14   5  163.56   14.91   0
 -10  14   5  175.91   19.37   0
  10  14  -5  174.92   12.00   0
  -8 -14   5   50.52   14.11   0
  -8 -14   5   32.33   11.74   0
  -8  14   5   57.77   17.73   0
   8 -14  -5   53.69   16.04   0
   8  14  -5   68.64   11.75   0
  -6 -14   5  159.65   14.67   0
  -6  14   5  187.57   15.60   0
  -6 -14   5  174.21   11.97   0
   6  14  -5  173.75   11.88   0
   6 -14  -5  165.34   14.25   0
  -4 -14   5   72.36   16.13   0
   4 -14  -5   74.29   13.61   0
  -4  14   5   93.34   14.87   0
  -4 -14   5   73.78   11.45   0
   4  14  -5   83.55   11.26   0
  -2 -14   5   95.29   11.20   0
  -2 -14   5   98.32   16.33   0
  -2  14   5  120.71   14.62   0
   2 -14  -5   87.38   10.72   0
   2 -14  -5   95.55   13.90   0
   2  14  -5  107.52   11.12   0
   0  14  -5   73.23   10.92   0
   0  14   5   81.41   14.31   0
   0 -14   5   64.52   16.18   0
   0 -14   5   57.40   10.83   0
   0 -14  -5   69.61   11.35   0
   0 -14  -5   55.97   10.74   0
  -2  14  -5   80.78   10.78   0
   2  14   5   86.06   14.27   0
   2 -14   5   72.56   18.41   0
   2 -14   5   71.60   13.08   0
  -2 -14  -5   86.55   13.67   0
  -2 -14  -5   79.24   13.30   0
   4  14   5   65.03   11.68   0
   4 -14   5   53.17   10.92   0
  -4  14  -5   53.48   10.91   0
  -4 -14  -5   59.11   11.41   0
   4 -14   5   49.47   18.38   0
  -4 -14  -5   49.62   13.14   0
   4 -14   5   62.32   16.06   0
   6 -14   5   91.38   20.08   0
   6  14   5   95.82   11.92   0
  -6 -14  -5   96.08   14.38   0
  -6  14  -5   94.04   11.20   0
   6 -14   5   81.01   18.82   0
  -6 -14  -5   62.32   11.60   0
   8 -14   5   68.81   20.71   0
  -8 -14  -5   63.98   12.26   0
   8  14   5   62.06   14.56   0
  -8 -14  -5   71.04   11.40   0
  -8  14  -5   73.71   11.59   0
   8 -14   5   61.60   19.27   0
  10  14   5   73.26   12.40   0
  10 -14   5   58.77   19.83   0
 -10 -14  -5   57.88   14.29   0
 -10  14  -5   51.34   14.24   0
  10 -14   5   46.53   21.59   0
 -10 -14  -5   48.78   15.10   0
  -9 -15   5   -4.45   15.25   0
  -9 -15   5   11.15   12.29   0
  -9  15   5   11.27   19.08   0
   9  15  -5   20.64   12.27   0
  -7 -15   5  125.37   15.60   0
  -7  15   5  143.97   18.78   0
  -7 -15   5  125.95   12.57   0
   7 -15  -5  103.71   15.10   0
   7  15  -5  159.37   12.35   0
  -5 -15   5    1.50   16.97   0
  -5  15   5    9.39   17.72   0
  -5 -15   5   14.51   11.64   0
   5 -15  -5    6.95   14.30   0
   5  15  -5    7.12   11.62   0
   3 -15  -5  165.82   12.21   0
  -3 -15   5  148.61   15.21   0
  -3  15   5  187.35   15.91   0
  -3 -15   5  184.40   12.21   0
   3 -15  -5  144.73   11.67   0
   3  15  -5  164.86   12.00   0
  -1  15   5    0.19   12.39   0
  -1 -15   5    7.57   17.14   0
  -1 -15   5    7.27   13.89   0
   1 -15  -5    0.17   11.53   0
   1 -15  -5   10.77   13.82   0
   1  15  -5   -4.32   13.75   0
  -1  15  -5  204.65   12.11   0
   1  15   5  193.01   12.90   0
   1 -15   5  186.26   18.26   0
  -1 -15  -5  171.07   11.69   0
  -1 -15  -5  189.33   14.87   0
   1 -15   5  188.81   12.04   0
  -3  15  -5    1.42   13.88   0
   3  15   5   16.29   12.11   0
   3 -15   5    4.19   19.06   0
  -3 -15  -5   -9.08   14.42   0
  -3 -15  -5   -3.53   13.65   0
   3 -15   5    5.17   11.25   0
   5  15   5  226.61   12.86   0
  -5  15  -5  179.59   14.63   0
  -5 -15  -5  185.93   12.83   0
   5 -15   5  167.14   20.31   0
  -5 -15  -5  163.59   11.94   0
   5 -15   5  188.14   20.26   0
  -7 -15  -5   -1.87   15.10   0
  -7  15  -5    3.53   11.71   0
  -7 -15  -5   10.70   11.73   0
   7 -15   5    1.27   19.83   0
   7 -15   5    3.47   19.46   0
   7  15   5    8.11   12.08   0
   2 -16  -5   47.81   11.73   0
   2  16  -5   61.45   12.43   0
   0  16   5   15.40   15.60   0
   0 -16  -5   16.75   11.93   0
   0  16  -5   10.08   11.95   0
  24   0  -6  267.26   14.57   0
 -24   0   6  271.25   20.03   0
  24   0  -6  306.85   16.30   0
  22   0  -6   81.12   10.66   0
 -22   0   6   74.23   17.48   0
  22   0  -6   85.55   15.96   0
  20   0  -6  142.13   10.39   0
 -20   0   6  156.88   16.62   0
  20   0  -6  163.54   13.70   0
  18   0  -6  492.42   10.88   0
 -18   0   6  499.50   17.48   0
  18   0  -6  593.69   16.63   0
  16   0  -6   58.13    9.09   0
 -16   0   6   67.24   14.21   0
  16   0  -6   78.18   14.06   0
  14   0  -6  779.00   11.07   0
  14   0  -6  885.27   17.76   0
 -14   0   6  723.13   17.02   0
  12   0  -6  349.47   11.21   0
 -12   0   6  343.54   14.37   0
  12   0  -6  401.69   15.77   0
  10   0  -6  589.74   12.30   0
  10   0  -6  699.02   17.15   0
 -10   0   6  597.81   15.57   0
  -8   0   6 1444.77   19.81   0
   8   0  -6 1661.65   21.97   0
   8   0  -6 1532.74   15.53   0
   6   0  -6  394.67   13.39   0
   6   0  -6  406.60    9.98   0
   4   0  -6 1645.53   20.11   0
   2   0  -6 1146.39   15.98   0
   0   0  -6  340.28    9.81   0
  -2   0  -6 1370.39   17.97   0
  -2   0  -6 1787.24   15.34   0
  -4   0  -6  523.07   13.48   0
  -4   0  -6  648.30   11.16   0
  -6   0  -6  340.85   12.11   0
  -6   0  -6  422.28   10.04   0
  -8   0  -6  177.37    9.66   0
   8   0   6  173.31    9.68   0
  -8   0  -6  215.75    9.19   0
 -10   0  -6  162.08    9.49   0
  10   0   6  155.23    9.47   0
 -10   0  -6  183.53    9.25   0
 -12   0  -6   10.29    8.77   0
  12   0   6    1.27    8.92   0
 -12   0  -6    4.38   10.65   0
 -14   0  -6  127.01    9.51   0
 -14   0  -6  117.04   11.69   0
  14   0   6  108.49   11.96   0
 -16   0  -6   22.80   12.01   0
 -16   0  -6   24.34    9.68   0
  16   0   6   34.67   10.22   0
 -18   0  -6   93.02   12.61   0
 -18   0  -6   91.28   10.46   0
  18   0   6   74.28   10.45   0
 -20   0  -6  123.22   11.30   0
 -20   0  -6  134.21   11.50   0
  20   0   6  110.86   11.53   0
 -22   0  -6  182.04   12.38   0
 -22   0  -6  183.65   15.44   0
  22   0   6  135.33   15.11   0
  23  -1  -6   26.26   11.01   0
  23   1  -6   27.11   11.12   0
 -23  -1   6   32.08   18.27   0
 -23   1   6   23.57   17.89   0
  23  -1  -6   36.46   16.22   0
  23   1  -6   30.86   14.11   0
  21  -1  -6   63.54   10.59   0
  21   1  -6   63.04   10.45   0
 -21  -1   6   55.53   16.64   0
 -21   1   6   72.02   18.76   0
 -21  -1   6   76.98   10.76   0
  21  -1  -6   83.72   15.64   0
  21   1  -6   81.55   13.52   0
  19  -1  -6   27.65    9.86   0
  19   1  -6   20.85    9.71   0
 -19  -1   6   19.24   13.38   0
 -19   1   6   17.96   16.91   0
  19  -1  -6   22.62   14.07   0
 -19  -1   6   17.66   11.93   0
  19   1  -6   35.87   14.30   0
  17   1  -6  156.47   12.40   0
  17  -1  -6  136.52    9.55   0
  17   1  -6  137.09    9.56   0
 -17  -1   6  135.57   13.11   0
 -17   1   6  133.83   14.77   0
  17  -1  -6  156.68   14.12   0
 -17  -1   6  120.05   11.51   0
  15  -1  -6   65.89    8.90   0
  15   1  -6   66.16   10.60   0
  15   1  -6   75.67   13.78   0
 -15  -1   6   64.72   11.81   0
 -15   1   6   65.01   14.89   0
  15  -1  -6   71.84   14.66   0
 -15  -1   6   56.94    9.00   0
  13  -1  -6  276.01   15.73   0
  13  -1  -6  255.70    9.84   0
  13   1  -6  229.71    9.15   0
  13   1  -6  277.54   13.10   0
 -13   1   6  220.39   16.17   0
 -13  -1   6  224.16   12.44   0
  11  -1  -6    2.36    8.16   0
  11   1  -6    4.58    8.03   0
 -11  -1   6    5.52   10.84   0
  11  -1  -6    5.77   13.95   0
 -11   1   6    8.80   12.96   0
  11   1  -6   12.35   11.31   0
   9   1  -6  305.92    9.34   0
   9  -1  -6  339.95   18.11   0
  -9  -1   6  273.35   12.22   0
   9   1  -6  350.52   12.90   0
   9  -1  -6  304.03    9.56   0
   7   1  -6  182.04   10.32   0
   7  -1  -6  189.94   15.02   0
   7   1  -6  199.81   11.76   0
  -7  -1   6  184.09   11.13   0
   7  -1  -6  172.61   10.61   0
   5  -1  -6  454.91   15.04   0
  -5  -1   6  413.06   11.09   0
   5  -1  -6  564.63   14.28   0
   5   1  -6  453.04   12.93   0
   5   1  -6  508.22   12.43   0
   3   1  -6    6.23    9.83   0
   3   1  -6    3.70    7.77   0
   3  -1  -6    5.71    9.43   0
   3  -1  -6    4.58    9.68   0
   1   1  -6 1467.75   16.25   0
   1  -1  -6 1767.19   18.03   0
  -1   1  -6   68.26    8.10   0
  -1  -1  -6   64.67    9.76   0
  -1   1  -6   50.94    9.69   0
  -3   1  -6 1938.54   21.55   0
  -3  -1  -6 1839.30   18.68   0
  -3   1  -6 2491.25   16.79   0
  -3  -1  -6 2303.59   16.82   0
  -5   1  -6   -1.22   10.21   0
  -5  -1  -6    3.82    9.95   0
   5   1   6    2.77    8.07   0
  -5   1  -6    4.35    8.06   0
  -5  -1  -6    5.59    9.98   0
  -7   1  -6 1355.09   17.21   0
  -7  -1  -6 1620.00   13.85   0
  -7  -1  -6 1304.74   15.73   0
   7  -1   6 1322.07   17.17   0
   7   1   6 1546.86   13.56   0
  -7   1  -6 1600.16   13.73   0
  -9   1  -6   27.04   10.49   0
  -9  -1  -6   22.24   10.65   0
   9  -1   6   19.15   10.57   0
   9   1   6   22.88    8.61   0
   9   1   6   25.44    8.44   0
  -9   1  -6   27.03    8.49   0
  -9  -1  -6   25.55    8.55   0
 -11  -1  -6  417.17   10.09   0
 -11   1  -6  357.04   12.10   0
 -11  -1  -6  351.72   12.25   0
 -11   1  -6  416.85   10.22   0
  11  -1   6  339.33   12.38   0
  11   1   6  331.36   12.25   0
  11   1   6  414.32    9.98   0
 -13  -1  -6  221.25    9.74   0
 -13   1  -6  184.59   11.69   0
 -13  -1  -6  191.52    9.83   0
  13  -1   6  180.29   10.30   0
  13   1   6  167.29   10.01   0
  13   1   6  215.86    9.51   0
 -13   1  -6  231.92    9.68   0
 -15   1  -6   46.68   11.51   0
 -15  -1  -6   51.99    9.60   0
 -15  -1  -6   43.27   11.55   0
  15  -1   6   38.91    9.83   0
  15   1   6   35.75    9.81   0
  15   1   6   40.79    9.36   0
 -15   1  -6   31.41    9.43   0
 -17   1  -6  357.44   10.82   0
 -17   1  -6  297.78   11.05   0
 -17  -1  -6  307.83   10.95   0
 -17  -1  -6  323.86   10.94   0
  17  -1   6  273.36   11.20   0
  17   1   6  252.23   11.17   0
  17   1   6  346.05   10.75   0
 -19   1  -6   76.32   10.73   0
 -19   1  -6   67.44   10.77   0
 -19  -1  -6   60.01   13.30   0
 -19  -1  -6   89.33   11.11   0
  19  -1   6   61.89   11.16   0
  19   1   6   71.44   13.49   0
  19   1   6   59.84   10.75   0
 -21   1  -6   64.13   11.70   0
 -21  -1  -6   59.42   14.14   0
 -21   1  -6   73.97   11.54   0
 -21  -1  -6   91.80   12.00   0
  21  -1   6   69.23   11.65   0
  21   1   6   64.97   11.70   0
  24   2  -6   -0.38   14.42   0
 -24  -2   6   10.26   11.91   0
  22   2  -6    1.20   13.78   0
  22  -2  -6    4.92   13.28   0
  22   2  -6   -2.97   10.74   0
 -22  -2   6    1.08   15.50   0
 -22   2   6    4.85   18.64   0
 -22  -2   6    2.19   10.73   0
  20  -2  -6  106.51   10.70   0
  20   2  -6  107.26   10.22   0
  20   2  -6  117.21   12.98   0
 -20  -2   6  101.59   14.25   0
 -20   2   6  103.89   19.39   0
 -20  -2   6   94.30   10.52   0
  18   2  -6   97.21   12.44   0
  18  -2  -6   83.11    9.91   0
  18   2  -6   85.13   11.78   0
 -18  -2   6   72.09   13.26   0
 -18   2   6   82.74   17.64   0
 -18  -2   6   81.91    9.69   0
  16  -2  -6  408.88   10.51   0
 -16   2   6  405.12   20.39   0
  16   2  -6  403.65   10.22   0
  16   2  -6  500.01   14.30   0
 -16  -2   6  432.69   10.75   0
 -16  -2   6  428.35   14.27   0
  16  -2  -6  509.02   20.55   0
  14  -2  -6   40.62    8.92   0
  14   2  -6   24.31    8.41   0
 -14   2   6   24.09   19.90   0
  14   2  -6   33.04   11.75   0
 -14  -2   6   29.39   11.68   0
  14  -2  -6   38.58   19.66   0
 -14  -2   6   23.10   10.91   0
  12   2  -6  367.61   11.38   0
  12   2  -6  444.33   13.50   0
 -12  -2   6  372.53   12.78   0
 -12  -2   6  349.27    9.96   0
  12  -2  -6  386.98    9.98   0
  10   2  -6    2.15    8.01   0
 -10  -2   6    6.23   10.26   0
 -10  -2   6   12.12    8.24   0
  10  -2  -6    1.59    8.32   0
  10   2  -6    5.50   10.71   0
   8   2  -6   59.14    7.98   0
   8   2  -6   61.21   10.58   0
   8  -2  -6   67.91   23.25   0
  -8  -2   6   59.22   10.34   0
   8  -2  -6   69.78   21.40   0
   8  -2  -6   70.91    8.44   0
   6   2  -6   80.83    9.97   0
   6   2  -6   73.87    9.00   0
  -6  -2   6   79.38   10.08   0
   6  -2  -6   87.06   15.08   0
   6  -2  -6   96.91   14.35   0
   4   2  -6   53.05   10.27   0
  -4  -2   6   55.08    9.92   0
   4  -2  -6   55.18   11.68   0
   4   2  -6   60.50   10.24   0
   4  -2  -6   70.35   11.62   0
   2   2  -6  313.12   11.22   0
   2  -2  -6  357.29   12.29   0
   2   2  -6  328.29   13.70   0
   0   2  -6  427.96   10.23   0
   0  -2  -6  537.86   12.42   0
  -2   2  -6   30.18    7.95   0
  -2   2  -6   32.38   13.10   0
  -2  -2  -6   30.68    8.14   0
   2   2   6   31.53    9.72   0
  -2  -2  -6   36.02    7.73   0
  -4   2  -6  181.78   13.30   0
  -4  -2  -6  173.95   10.55   0
  -4   2  -6  206.54    9.10   0
   4   2   6  205.90    9.17   0
  -4  -2  -6  199.84   10.91   0
  -6   2  -6   93.96   12.49   0
  -6  -2  -6   91.20    8.38   0
   6   2   6  111.56    8.62   0
  -6   2  -6  112.08    8.49   0
  -6  -2  -6  103.03    8.65   0
  -8  -2  -6   72.39    8.47   0
  -8   2  -6   60.37   10.81   0
  -8  -2  -6   45.19   10.88   0
   8  -2   6   57.63   10.93   0
   8   2   6   74.95    8.57   0
  -8   2  -6   68.95    8.53   0
 -10   2  -6   -0.73   10.55   0
 -10  -2  -6    2.71   10.63   0
 -10  -2  -6    0.59    8.54   0
  10  -2   6    7.40   10.91   0
  10   2   6    7.44    8.83   0
  10   2   6    4.28    8.44   0
 -10   2  -6   -3.29    8.61   0
 -12   2  -6   21.21   10.83   0
 -12  -2  -6   28.58    8.95   0
 -12  -2  -6   24.72   10.98   0
  12  -2   6   24.07   11.25   0
  12   2   6   16.41   11.11   0
  12   2   6   24.09    8.75   0
 -12   2  -6   24.50    8.87   0
 -14   2  -6   -0.07   11.33   0
 -14  -2  -6   16.25   11.50   0
 -14  -2  -6    9.46   11.59   0
 -14   2  -6   -5.80    9.55   0
  14  -2   6    3.12   11.90   0
  14   2   6    1.93   11.81   0
  14   2   6   -1.30    9.21   0
 -16   2  -6    9.64    9.68   0
 -16  -2  -6   10.23   10.20   0
 -16  -2  -6    5.19    9.76   0
  16  -2   6    8.01   10.07   0
  16   2   6   13.25   10.06   0
  16   2   6    8.63    9.68   0
 -16   2  -6    3.83    9.47   0
 -18   2  -6    2.81   10.00   0
 -18   2  -6    4.97   10.32   0
 -18  -2  -6   -0.54   12.47   0
 -18  -2  -6   -0.79   10.62   0
  18  -2   6    0.72   12.93   0
  18   2   6   11.27   10.62   0
  18   2   6    1.96   10.45   0
 -20   2  -6   20.42   11.40   0
 -20   2  -6   28.03   10.93   0
 -20  -2  -6   21.81   10.83   0
 -20  -2  -6   36.40   13.78   0
  20  -2   6   11.96   11.46   0
  20   2   6   26.22   13.45   0
  20   2   6   15.87   13.08   0
 -22  -2  -6    9.83   11.60   0
  22  -2   6   -0.37   14.84   0
  22   2   6   -4.39   11.68   0
 -22   2  -6   10.48   12.00   0
  23  -3  -6   38.24   11.73   0
  23   3  -6   25.47   11.41   0
 -23  -3   6   42.50   15.98   0
 -23   3   6   35.10   24.99   0
 -23  -3   6   41.39   11.54   0
  23   3  -6   51.20   14.17   0
  21   3  -6   18.41   12.95   0
  21  -3  -6   21.70   10.56   0
  21   3  -6   12.51   10.31   0
 -21  -3   6   14.66   14.60   0
 -21   3   6   12.85   22.56   0
 -21  -3   6    5.44   10.79   0
  19  -3  -6   16.95    9.86   0
  19   3  -6   11.35   12.60   0
 -19   3   6   10.10   25.23   0
  19   3  -6    8.97    9.73   0
 -19  -3   6   24.26   13.47   0
 -19  -3   6    4.92   10.07   0
  17  -3  -6   39.53   11.48   0
  17   3  -6   45.72   12.22   0
  17   3  -6   32.93   11.23   0
 -17  -3   6   30.96   12.67   0
 -17  -3   6   35.97    9.43   0
  15  -3  -6   19.87    9.03   0
  15   3  -6   19.03    8.82   0
  15   3  -6   17.79    9.72   0
 -15  -3   6   16.66   11.69   0
 -15  -3   6   13.96    9.10   0
  13   3  -6  131.38    9.00   0
  13   3  -6  158.26   10.17   0
 -13  -3   6  129.97    9.93   0
 -13  -3   6  137.82    9.17   0
  13  -3  -6  137.11    9.32   0
  11   3  -6   32.64   10.16   0
 -11  -3   6   31.83    8.48   0
  11   3  -6   27.32   10.85   0
 -11  -3   6   30.85   10.63   0
  11  -3  -6   33.59    8.46   0
   9   3  -6  130.23    8.56   0
  -9  -3   6  132.07    9.05   0
   9   3  -6  138.79   11.19   0
  -9  -3   6  135.41   10.55   0
   9  -3  -6  134.95    8.93   0
   7   3  -6  129.44    8.82   0
   7   3  -6  112.73   10.30   0
  -7  -3   6  113.65    8.65   0
   5   3  -6  565.28   13.30   0
   5  -3  -6  702.27   20.74   0
   5  -3  -6  542.27   18.43   0
  -5  -3   6  531.84   12.13   0
   5   3  -6  564.15   11.15   0
   3  -3  -6  484.56   13.93   0
   3   3  -6  428.29   14.46   0
  -3  -3   6  384.24   11.39   0
   3   3  -6  419.11   11.75   0
   1   3  -6 1656.70   25.52   0
   1   3  -6 1506.96   15.82   0
  -1   3   6 1836.69   19.28   0
   1  -3  -6 1853.60   19.13   0
  -1   3  -6   76.99    8.37   0
  -1   3  -6   81.75   19.40   0
   1   3   6   96.87   10.12   0
  -1  -3  -6  108.19   10.09   0
  -1   3  -6   91.08   17.91   0
  -3  -3  -6  822.70   11.86   0
  -3   3  -6  678.50   24.49   0
  -3   3  -6  655.33   10.85   0
  -3  -3  -6  641.32   11.06   0
   3   3   6  761.57   11.52   0
  -5   3  -6   54.34   14.38   0
  -5  -3  -6   55.97    8.52   0
  -5  -3  -6   52.02    8.44   0
  -5   3  -6   50.94    8.24   0
  -5   3  -6   65.11    8.47   0
   5   3   6   61.47    8.43   0
  -7   3  -6  198.66   13.17   0
  -7  -3  -6  214.77    9.25   0
  -7  -3  -6  181.02    9.44   0
   7  -3   6  173.14   13.38   0
  -7   3  -6  221.64    9.16   0
   7   3   6  227.02    9.22   0
  -9   3  -6   45.36   12.34   0
  -9  -3  -6   50.58    8.76   0
  -9  -3  -6   34.89    8.83   0
   9  -3   6   37.06   12.80   0
   9   3   6   32.67    8.77   0
   9   3   6   45.57    8.33   0
  -9   3  -6   44.50    8.68   0
 -11   3  -6  177.76   11.67   0
 -11  -3  -6  223.16    9.92   0
 -11  -3  -6  199.16   11.78   0
  11  -3   6  172.99   12.29   0
  11   3   6  159.29   11.69   0
  11   3   6  212.91   11.45   0
 -11   3  -6  244.85    9.69   0
 -13   3  -6    4.95   11.02   0
 -13  -3  -6    7.01    9.41   0
 -13  -3  -6    1.43    9.34   0
  13  -3   6    5.03   11.74   0
  13   3   6   -8.91   11.45   0
  13   3   6    3.26    9.31   0
 -13   3  -6   -1.76    9.07   0
 -15   3  -6  122.38   10.04   0
 -15  -3  -6  132.23   10.17   0
 -15  -3  -6  114.94    9.75   0
  15  -3   6  101.41   12.69   0
  15   3   6  111.59   10.28   0
  15   3   6  117.07    9.80   0
 -15   3  -6  140.62    9.91   0
 -17  -3  -6    8.32   10.30   0
 -17   3  -6   -9.41    9.94   0
 -17  -3  -6   -2.71   10.46   0
  17  -3   6   -3.36   12.91   0
  17   3   6  -10.79   10.28   0
  17   3   6   10.20   10.05   0
 -17   3  -6    3.50   12.26   0
 -19   3  -6   53.05   10.72   0
 -19  -3  -6   45.38   10.85   0
 -19  -3  -6   40.52   11.28   0
  19  -3   6   38.86   14.14   0
  19   3   6   59.49   11.24   0
  19   3   6   44.83   10.86   0
 -19   3  -6   42.69   11.18   0
 -21   3  -6   28.32   11.55   0
 -21  -3  -6   23.69   11.42   0
 -21  -3  -6   28.27   11.88   0
  21  -3   6   24.50   14.48   0
  21   3   6   16.91   14.29   0
  21   3   6   17.52   11.63   0
 -21   3  -6   27.43   14.25   0
  22   4  -6   42.39   13.97   0
  22  -4  -6   38.84   11.28   0
  22   4  -6   37.44   10.92   0
 -22  -4   6   29.60   15.60   0
 -22  -4   6   32.72   11.39   0
  20  -4  -6  436.68   11.78   0
  20   4  -6  474.08   14.96   0
  20   4  -6  425.96   11.61   0
 -20  -4   6  429.18   13.52   0
 -20  -4   6  431.66   11.81   0
  18  -4  -6    6.33    9.54   0
  18   4  -6    9.52   10.25   0
  18   4  -6    3.18    9.62   0
 -18  -4   6   -3.45   13.07   0
 -18  -4   6    8.27    9.90   0
  16  -4  -6  526.69   11.15   0
 -16  -4   6  536.09   11.31   0
  16   4  -6  530.38   11.05   0
  16   4  -6  622.46   14.55   0
 -16  -4   6  524.62   13.98   0
  14   4  -6   -1.11   10.81   0
  14   4  -6    9.72   11.59   0
 -14  -4   6   -1.83    9.45   0
 -14  -4   6    7.36   11.04   0
  14  -4  -6   -6.01    9.17   0
  12   4  -6  394.69   10.23   0
  12   4  -6  434.89   13.14   0
 -12  -4   6  408.39   11.07   0
  12  -4  -6  446.42   10.47   0
 -12  -4   6  401.71   10.40   0
 -10  -4   6  116.71   10.80   0
  10   4  -6  109.93   10.54   0
  10   4  -6  118.92    9.43   0
  10  -4  -6  121.58    9.13   0
 -10  -4   6  105.44   11.01   0
   8   4  -6  813.43   12.44   0
   8   4  -6  769.43   13.27   0
  -8  -4   6  802.25   13.55   0
  -8  -4   6  745.46   12.16   0
   6   4  -6  481.58   12.72   0
   6   4  -6  492.46   12.19   0
  -6  -4   6  507.12   12.98   0
  -6  -4   6  484.09   10.43   0
   4   4  -6 1106.32   18.31   0
  -4  -4   6 1027.40   12.67   0
   4  -4  -6 1389.96   22.26   0
   4   4  -6 1138.68   14.72   0
  -2  -4   6 1109.40   14.39   0
   2   4  -6 1233.81   23.57   0
   2  -4  -6 1526.37   19.39   0
  -2   4   6 1372.09   18.29   0
   2   4  -6 1133.84   13.04   0
   0  -4  -6  671.83   13.91   0
   0   4  -6  534.17   10.75   0
   0   4   6  632.32   13.35   0
  -2  -4  -6 1865.45   16.38   0
  -2  -4  -6 1506.05   14.53   0
   2   4   6 1755.09   16.95   0
  -2   4  -6 1521.71   13.78   0
  -4  -4  -6  382.49   11.68   0
  -4  -4  -6  304.37    9.85   0
  -4   4  -6  305.47    9.48   0
   4   4   6  359.62    9.82   0
  -6  -4  -6  601.67   11.01   0
  -6  -4  -6  447.13   10.47   0
  -6   4  -6  634.64   10.72   0
  -6   4  -6  465.84   10.04   0
   6   4   6  495.53   12.09   0
  -6   4  -6  506.23   19.05   0
  -8  -4  -6  147.82    9.12   0
  -8  -4  -6  129.15   10.87   0
   8  -4   6  125.69   14.55   0
  -8   4  -6  115.37    8.83   0
  -8   4  -6  160.77    9.20   0
   8   4   6  141.05   10.86   0
  -8   4  -6  132.04   12.75   0
 -10  -4  -6  125.47    9.27   0
 -10  -4  -6   97.33    9.22   0
  10  -4   6  103.50   13.65   0
  10   4   6   99.60    9.28   0
 -10   4  -6  135.76    9.38   0
  10   4   6  117.23    8.91   0
 -10   4  -6  114.16   12.75   0
 -12  -4  -6    6.45   11.67   0
 -12  -4  -6   16.48    9.09   0
  12  -4   6   12.22   13.38   0
  12   4   6   12.05   11.27   0
  12   4   6   14.14    9.19   0
 -12   4  -6   12.32    9.09   0
 -12   4  -6   10.44   11.06   0
 -14  -4  -6  378.05   10.86   0
 -14  -4  -6  284.82   10.81   0
  14  -4   6  275.01   13.67   0
  14   4   6  266.80   10.66   0
  14   4   6  316.88   12.38   0
 -14   4  -6  344.33   10.33   0
 -14   4  -6  301.16   12.95   0
 -16  -4  -6   23.50   10.09   0
 -16  -4  -6   47.49   10.49   0
  16  -4   6   40.43   12.62   0
  16   4   6   24.01   10.34   0
  16   4   6   38.74   10.23   0
 -16   4  -6   32.02    9.77   0
 -16   4  -6   35.43   12.15   0
 -18   4  -6  401.33   14.22   0
 -18  -4  -6  358.05   11.57   0
 -18  -4  -6  476.19   12.14   0
  18  -4   6  337.82   14.78   0
 -18   4  -6  440.27   11.60   0
  18   4   6  337.30   14.08   0
  18   4   6  387.72   11.67   0
 -20   4  -6   12.22   13.49   0
 -20  -4  -6   12.55   11.23   0
 -20  -4  -6    5.75   11.79   0
  20  -4   6   -0.74   14.44   0
  20   4   6   19.81   11.57   0
  20   4   6   16.99   11.49   0
 -20   4  -6   10.02   13.97   0
  23   5  -6    2.91   14.67   0
 -23  -5   6    3.43   12.00   0
  21  -5  -6  245.59   11.64   0
  21   5  -6  271.39   14.82   0
 -21  -5   6  262.72   11.94   0
  21   5  -6  242.66   11.61   0
 -21  -5   6  227.43   15.78   0
  19  -5  -6   22.79   10.41   0
  19   5  -6   32.10   13.25   0
  19   5  -6   10.76   10.25   0
 -19  -5   6   30.22   13.80   0
 -19  -5   6   23.38   10.68   0
  17  -5  -6  281.29   10.92   0
  17   5  -6  266.97   10.63   0
  17   5  -6  317.84   13.72   0
 -17  -5   6  277.55   11.51   0
 -17  -5   6  259.36   13.09   0
  15   5  -6   25.22    9.35   0
  15   5  -6   33.61   10.06   0
 -15  -5   6   27.21    9.93   0
 -15  -5   6   27.49    9.54   0
  15  -5  -6   37.11    9.33   0
  13   5  -6  293.08   10.15   0
  13  -5  -6  343.51   10.21   0
  13   5  -6  365.59   12.92   0
 -13  -5   6  303.54   10.75   0
 -13  -5   6  304.51   10.45   0
  11   5  -6    7.83   10.53   0
  11   5  -6    8.27    8.97   0
 -11  -5   6    2.62    9.22   0
  11  -5  -6   -6.02    8.84   0
 -11  -5   6    0.48    8.61   0
  -9  -5   6  587.28   12.87   0
   9   5  -6  602.80   12.95   0
   9   5  -6  645.01   11.74   0
  -9  -5   6  598.19   11.36   0
   7   5  -6   21.69    8.77   0
  -7  -5   6   19.76   10.34   0
   7   5  -6   19.85   10.33   0
  -7  -5   6   22.81    8.65   0
   5   5  -6 1415.36   19.50   0
   5   5  -6 1498.92   14.40   0
  -5  -5   6 1395.93   13.93   0
  -5  -5   6 1405.53   19.23   0
   5  -5  -6 1705.12   28.27   0
   3   5  -6    3.12   13.15   0
  -3  -5   6    1.94    8.37   0
   3  -5  -6    5.68   10.71   0
   3   5  -6   -2.82    8.34   0
  -3   5   6    1.94   11.53   0
   1  -5  -6 1627.88   19.03   0
   1   5  -6 1262.38   13.13   0
   1   5  -6   93.15   17.16   0
  -1  -5   6 1245.95   13.07   0
  -1   5   6 1501.35   17.76   0
  -1  -5  -6   41.15    8.85   0
  -1   5  -6   37.62    8.37   0
   1   5   6   43.85   10.16   0
  -3  -5  -6  551.49   12.65   0
  -3  -5  -6  437.87   10.15   0
  -3   5  -6  421.86    9.99   0
   3   5   6  522.01   10.63   0
  -5  -5  -6   38.35    8.70   0
  -5   5  -6   21.51    8.34   0
  -5  -5  -6   26.12    8.50   0
   5   5   6   29.63    8.32   0
  -7  -5  -6  888.32   13.63   0
  -7  -5  -6  694.52   11.28   0
   7  -5   6  724.03   22.62   0
   7   5   6  830.18   11.51   0
  -7   5  -6  687.53   10.88   0
  -9  -5  -6   71.79    9.36   0
  -9  -5  -6   56.05   10.88   0
   9  -5   6   60.20   12.95   0
  -9   5  -6   62.32    9.24   0
  -9   5  -6   54.85    8.87   0
   9   5   6   59.80    9.00   0
 -11  -5  -6 1280.56   13.29   0
 -11  -5  -6  976.28   14.03   0
  11  -5   6  987.78   17.51   0
 -11   5  -6 1239.65   12.77   0
 -11   5  -6  974.95   12.01   0
  11   5   6 1191.66   13.01   0
 -11   5  -6 1073.09   18.37   0
 -13   5  -6    4.92    9.23   0
 -13  -5  -6   12.33    9.61   0
 -13  -5  -6   23.15    9.60   0
  13  -5   6    6.33   14.12   0
  13   5   6    3.40   11.64   0
 -13   5  -6   -9.81    9.36   0
  13   5   6    4.84    9.39   0
 -13   5  -6    5.76   11.41   0
 -15  -5  -6  409.08   13.27   0
 -15  -5  -6  547.39   11.74   0
  15  -5   6  413.40   14.32   0
  15   5   6  408.12   11.36   0
  15   5   6  505.01   11.62   0
 -15   5  -6  523.30   11.32   0
 -15   5  -6  455.51   13.62   0
 -17  -5  -6    3.08   10.44   0
 -17  -5  -6    9.33   10.66   0
  17  -5   6   -3.83   13.05   0
  17   5   6    0.53   12.95   0
 -17   5  -6   15.05   12.52   0
  17   5   6    3.45   10.57   0
 -17   5  -6   13.63   10.50   0
 -19  -5  -6   59.08   11.05   0
 -19  -5  -6   70.12   11.76   0
  19  -5   6   66.27   14.47   0
  19   5   6   57.47   13.85   0
  19   5   6   80.88   11.42   0
 -19   5  -6   69.28   13.90   0
 -19   5  -6   98.57   13.21   0
 -21  -5  -6   23.67   11.86   0
  21   5   6   31.25   12.05   0
 -21   5  -6   20.78   14.64   0
  22  -6  -6    7.54   14.49   0
  22   6  -6    9.91   11.63   0
  22   6  -6   10.59   14.04   0
 -22  -6   6   -6.92   15.84   0
 -22  -6   6    3.26   11.92   0
  20  -6  -6   13.79   10.94   0
  20   6  -6    2.67   11.42   0
  20   6  -6   14.26   10.71   0
 -20  -6   6    6.08   12.02   0
 -20  -6   6   10.94   11.06   0
  18  -6  -6    2.96   10.24   0
  18   6  -6   13.76   13.24   0
  18   6  -6    5.84   10.12   0
 -18  -6   6   11.19   10.99   0
 -18  -6   6    1.20   10.46   0
  16   6  -6   52.79   12.16   0
  16   6  -6   54.41   10.54   0
 -16  -6   6   53.31   12.78   0
 -16  -6   6   61.97   12.41   0
  16  -6  -6   51.48   10.01   0
  14   6  -6   14.02    9.39   0
  14   6  -6   17.51   10.06   0
 -14  -6   6   13.50    9.80   0
  14  -6  -6   11.40    9.42   0
 -14  -6   6   13.87   11.68   0
  12   6  -6  179.17    9.82   0
  12   6  -6  205.19   12.14   0
 -12  -6   6  179.97   10.28   0
  12  -6  -6  200.08    9.78   0
 -12  -6   6  184.23    9.99   0
 -10  -6   6  167.17   11.51   0
  10   6  -6  206.46   11.96   0
  10   6  -6  175.01    9.57   0
 -10  -6   6  164.42    9.74   0
  -8  -6   6   90.59    9.16   0
   8   6  -6   86.43    9.17   0
   8   6  -6  114.73    9.12   0
  -8  -6   6  100.10   11.00   0
   6   6  -6  565.12   10.90   0
   6   6  -6  524.81   13.80   0
  -6  -6   6  512.09   10.62   0
  -6  -6   6  523.90   13.67   0
   6  -6  -6  573.45   24.21   0
  -4  -6   6   16.81   11.77   0
   4   6  -6   15.32    8.51   0
   4   6  -6   16.55   12.05   0
  -4   6   6   18.29   13.15   0
   4  -6  -6   18.21   12.27   0
  -4  -6   6   16.53    8.38   0
   2  -6  -6  279.58   14.37   0
   2   6  -6  266.51    9.53   0
  -2  -6   6  249.55    9.43   0
  -2   6   6  271.07   12.05   0
   0  -6  -6  109.27   11.46   0
   0  -6   6   87.44    8.62   0
   0   6   6   94.76    8.87   0
   0   6  -6   82.15    8.71   0
  -2   6  -6    2.14    8.34   0
  -2  -6  -6   16.60   10.60   0
  -2  -6  -6    6.36    8.49   0
   2   6   6   14.31    8.51   0
  -4  -6  -6   26.36    8.76   0
  -4  -6  -6   22.26   10.15   0
  -4   6  -6   14.32    8.36   0
   4   6   6   26.73    8.63   0
  -6   6  -6   10.26   10.31   0
  -6  -6  -6   17.65    8.54   0
  -6  -6  -6    7.51    8.66   0
   6   6   6   10.36    8.49   0
  -8  -6  -6  414.70   10.51   0
  -8   6  -6  312.50    9.83   0
  -8  -6  -6  320.11   10.01   0
   8  -6   6  332.29   19.64   0
   8   6   6  390.90   10.28   0
 -10  -6  -6  334.21   10.56   0
 -10  -6  -6  273.67   10.07   0
  10  -6   6  287.92   16.54   0
 -10   6  -6  348.65   10.29   0
  10   6   6  323.20   10.08   0
 -10   6  -6  286.68    9.98   0
 -12   6  -6  466.10   10.39   0
 -12  -6  -6  492.29   11.10   0
 -12  -6  -6  621.37   11.63   0
  12  -6   6  454.67   16.55   0
 -12   6  -6  591.75   13.03   0
  12   6   6  575.82   11.40   0
 -14  -6  -6  200.07   10.61   0
 -14  -6  -6  252.06   10.94   0
  14  -6   6  198.00   15.35   0
  14   6   6  201.76   10.72   0
 -14   6  -6  251.62   10.48   0
  14   6   6  232.10   10.66   0
 -14   6  -6  193.74    9.88   0
 -16  -6  -6  182.68   10.82   0
 -16   6  -6  179.67   10.56   0
  16  -6   6  188.71   16.06   0
 -16  -6  -6  237.17   11.42   0
  16   6   6  180.05   11.09   0
  16   6   6  238.61   11.25   0
 -16   6  -6  238.56   10.82   0
[truncated: 4,106,284 more chars]
